# Supplementary material for: Stereoselective synthesis of difunctionalized succinimides from aza-1,6-enynes by radical cascade reaction
Source: Royal Society of Chemistry journal article supplement (doi:10.1039/d3cc01391j), 2023-01-01
Supplement: d3cc01391j1.pdf [file d3cc01391j1.pdf]

## Supporting Information

### Stereoselective Synthesis of Difunctionalized Succinimides from Aza-1,6-Enynes by Radical Cascade Reaction

Shivam A. Meena, Poonam Sharma\*, and Akhilesh K. Verma\*

Email: averma@acbr.du.ac.in

#### Table of Contents

|                                                                                                     |                  |
|-----------------------------------------------------------------------------------------------------|------------------|
| <b>1. General Information.....</b>                                                                  | <b>S2</b>        |
| <b>2. Synthesis of Substrates 1(1a-1k).....</b>                                                     | <b>S2-S4</b>     |
| <b>3. General procedure for the synthesis of Sulfonothioates 2 (2a-2n).....</b>                     | <b>S4-S6</b>     |
| <b>4. General procedure for the synthesis of sulfonoselenates 4 .....</b>                           | <b>S6</b>        |
| <b>5. General procedure for the Radical cascade sulfonation and thiolation.....</b>                 | <b>S7</b>        |
| <b>6. Standardization of reaction conditions.....</b>                                               | <b>S7-S9</b>     |
| <b>7. Control Experiments.....</b>                                                                  | <b>S9</b>        |
| <b>8. Characterization Data of the Products 1, 2, 3, 5.....</b>                                     | <b>S9-S37</b>    |
| <b>9. Copies of <sup>1</sup>H NMR, <sup>13</sup>C NMR, <sup>19</sup>F NMR and Mass Spectra.....</b> | <b>S38-186</b>   |
| <b>10. GCMS data.....</b>                                                                           | <b>S187-S188</b> |
| <b>11. X-Ray Crystallographic Data of 3aa and 5e.....</b>                                           | <b>S188-S191</b> |
| <b>12. References.....</b>                                                                          | <b>S191</b>      |

## (1) General Information.

All reagents were purchased (unless specified) at highest commercial quality and used as received. Reaction mixtures were stirred magnetically. All required temperatures for reactions were achieved using a IKA heating plate and oil bath.

**Rf:** LC analysis was performed on commercially prepared 60 F<sub>254</sub> silica gel plates and visualized by either UV irradiation or by staining with I<sub>2</sub>. Column chromatography was performed using 100- 200 mesh silica gel.

**Melting Point:** Melting points were measured on a Kofler hot-stage melting point apparatus and are uncorrected.

**<sup>1</sup>H NMR:** Spectra were recorded on JEOL ECS (400 MHz) instruments. Chemical shifts ( $\delta$  H) are quoted in parts per million (ppm) was used. Spin-spin coupling constants (*J*) are reported in Hertz (Hz).

**<sup>13</sup>C NMR:** Spectra were recorded on JEOL ECS (100 MHz) instruments. Chemical shifts ( $\delta$  C) are quoted in parts per million (ppm) and referenced to the appropriate solvent peak(s). Spin-spin coupling constants (*J*) are reported in Hertz (Hz).

**HRMS:** High resolution mass spectra were recorded on an Agilent 6500 series B5125 mass spectrometer (ESI-TOF).

## (2) Synthesis of Substrates 1:

Substrates **1(1a-1k)** were prepared following the reported procedure.<sup>1</sup>

### (i) Amide coupling for the synthesis of N-arylpropiolamides (S1):

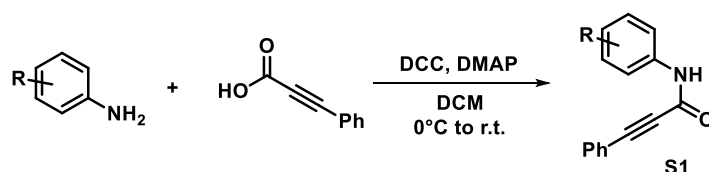

Phenylpropionic acid (1 equiv) and DMAP (10 mol%) were charged into an oven-dried round-bottom flask, which was then purged with nitrogen gas for 10 minutes. After dissolving the mixture in DCM, amine (1.1 equiv) was added. The mixture was cooled to 0°C and a saturated solution of DCC (1.0 equiv) in DCM was added dropwise. After addition the reaction mixture was warmed to the room temperature and stirred for approximately 12 hours (overnight). The contents of the flask were then filtered using a plug of Celite. The filtrate obtained was then concentrated under reduced pressure while adsorbing onto silica gel. The obtained adsorbed silica plug was then purified using silica gel column chromatography (PE:EA=19:1) to afford pure product **S1**.

**(ii) Methallylation of S1**

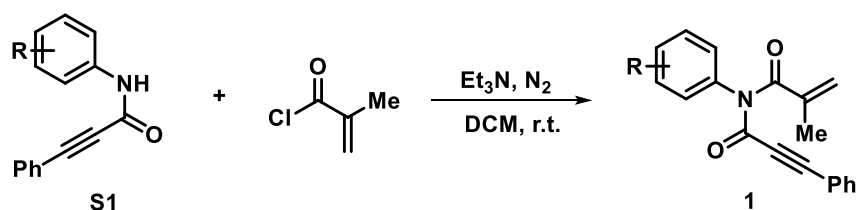

An oven-dried round-bottom flask equipped with a magnetic stir bar was charged with **S1** (1.0 equiv) then sealed with septum and purged with nitrogen gas for 10 minutes. Afterwards DCM were added. Then, Methacryloyl chloride (1.5 equiv) and  $\text{Et}_3\text{N}$  (2.0 equiv) were added successively in dropwise manner while stirring the reaction mixture. The reaction mixture was then stirred at room temperature for 6 h until **S1** was consumed completely. The solvent was removed under reduced pressure while adsorbing the filtrate onto silica gel. The crude residue was purified by silica gel column chromatography (PE:EA=0.5:9.5) to afford pure product **1**. The prepared substrates (**1a-1k**) are as follows:

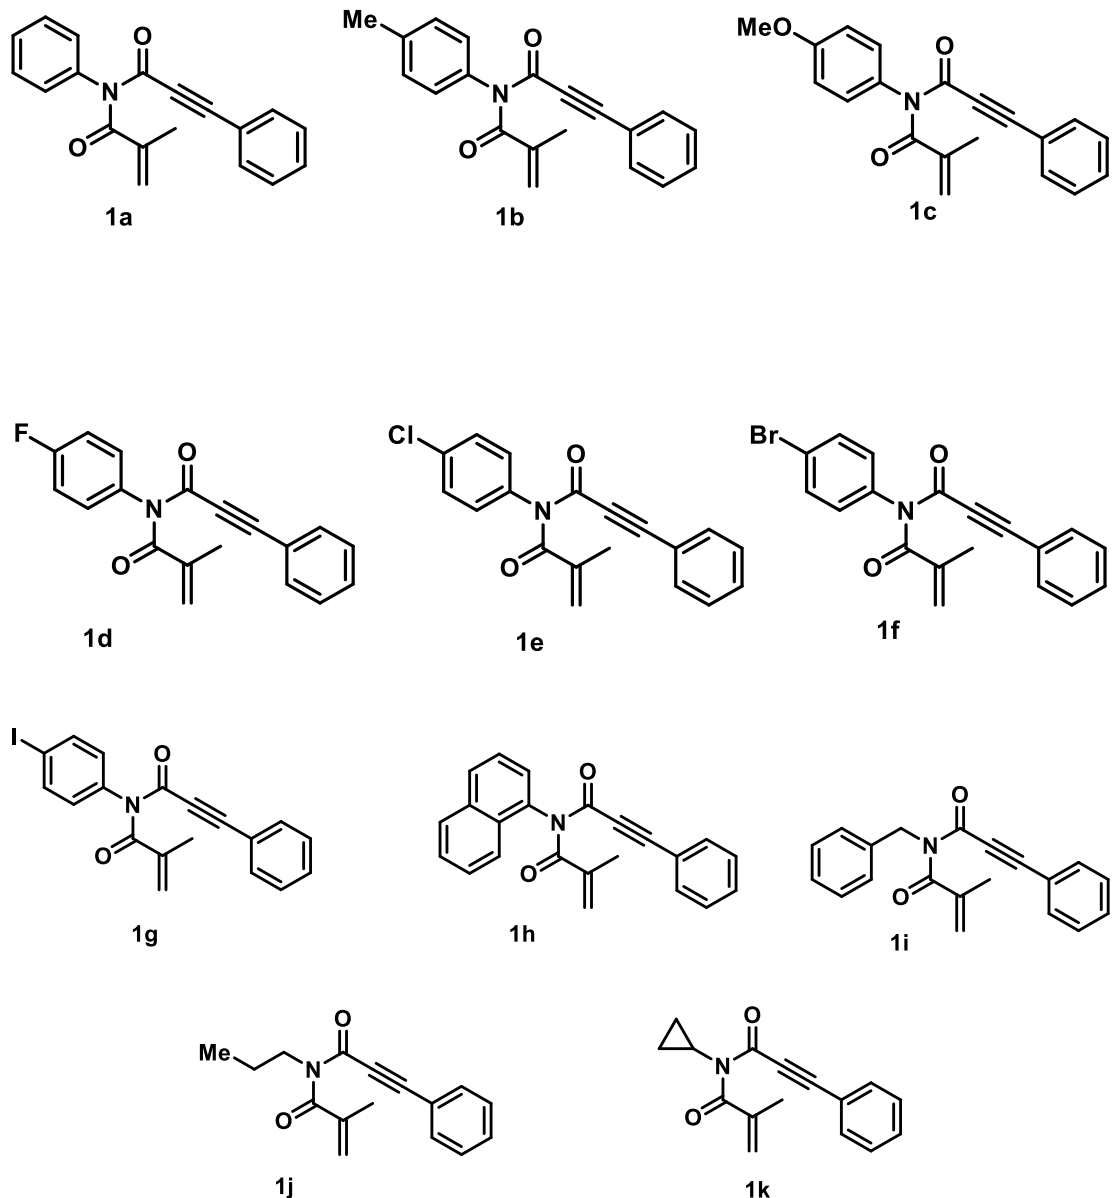

### (3) General procedure for the synthesis of sulfonothioates:

Sulfonothioates were prepared following the reported procedure.<sup>2,3</sup>

#### (i) Synthesis of S-phenyl arene/heteroarenesulfonothioates S-Aryl arenesulfonothioates:

*p*-methyl benzenesulfinate salt (1.0 g, 6.4 mmol) was mixed with diphenyl disulfide (0.437 g, 2.0 mmol) in CH<sub>2</sub>Cl<sub>2</sub> (10 mL), I<sub>2</sub> (1.015 g, 4.0 mmol) was added while mixing. The mixture was stirred until the disulfide was consumed completely (2 hours). Then aqueous Na<sub>2</sub>S<sub>2</sub>O<sub>3</sub>

was added. The organic layer was concentrated under reduced pressure. The product was purified by column chromatography system using silica applying a PE: EtOAc gradient (95: 5). S-phenyl benzenethiosulfonate was obtained in 96% (0.966 g) yield. Yellow solid, m.p.: 45-47 °C.

**(ii) Synthesis of S-alkyl arenesulfonothioates:**

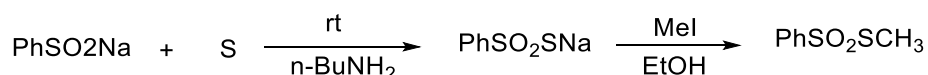

A mixture of PhSO<sub>2</sub>Na (6.56 g, 40 mmol) and S (1.28 g, 40 mmol) in n-BuNH<sub>2</sub> (40 mL) was stirred at room temperature for 0.5 h, after removal of the solvent under reduced pressure, the residue was washed by Et<sub>2</sub>O to obtain a white solid PhSO<sub>2</sub>SNa. Then PhSO<sub>2</sub>SNa was dissolved in EtOH (40 mL), then CH<sub>3</sub>I (11.36 g, 80 mmol) was added to the solution. The reaction mixture was stirred at 40-45 °C for 24 h. After removal of the solvent under reduced pressure, the reaction mixture was poured on a solution of Na<sub>2</sub>S<sub>2</sub>O<sub>3</sub> and CH<sub>2</sub>Cl<sub>2</sub> (30 mL). The precipitate was filtered and dried by anhydrous Na<sub>2</sub>SO<sub>4</sub>, the residue was purified through column chromatography (PE:EA = 20:1) afforded the desired product 3a (3.1 g, 40% yield) as a yellow oil.

**(iii) S-(pent-4-yn-1-yl) 4-methylbenzenesulfonothioate:**

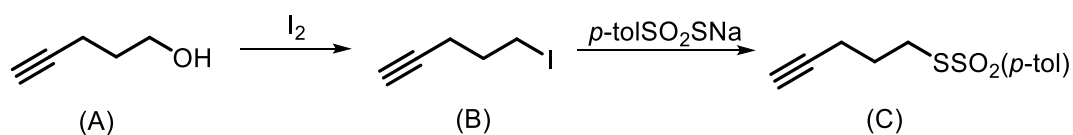

To a solution of imidazole (1.64 g, 24 mmol), PPh<sub>3</sub> (6.3 g, 24 mmol) and **A** (1.4 g, 20 mmol) in dry DCM (30 mL) was added I<sub>2</sub> (6.1 g, 24 mmol) slowly at 0 °C and stirred for 1 h at RT. The reaction mixture was quenched with saturated aqueous Na<sub>2</sub>S<sub>2</sub>O<sub>3</sub>, diluted with EtOAc, washed with water and brine, dried over Na<sub>2</sub>SO<sub>4</sub> and concentrated under reduced pressure. The crude product was purified by silica column chromatography to afford compound **B**. Then PhSO<sub>2</sub>SNa (20 mmol) was dissolved in EtOH (40 mL), **B** was added to the solution. The reaction mixture was stirred at 40-45 °C overnight. After removal of the solvent under

reduced pressure, the reaction mixture was quenched with saturated aqueous  $\text{Na}_2\text{S}_2\text{O}_3$ , diluted with DCM, dried over  $\text{Na}_2\text{SO}_4$  and the residue was purified through column chromatography (PE:EA = 30:1) afforded the desired product **C** (1.4 g, 30% yield) as a yellow oil.

The prepared sulfonylthioates (**2a-2n**) are as follows:

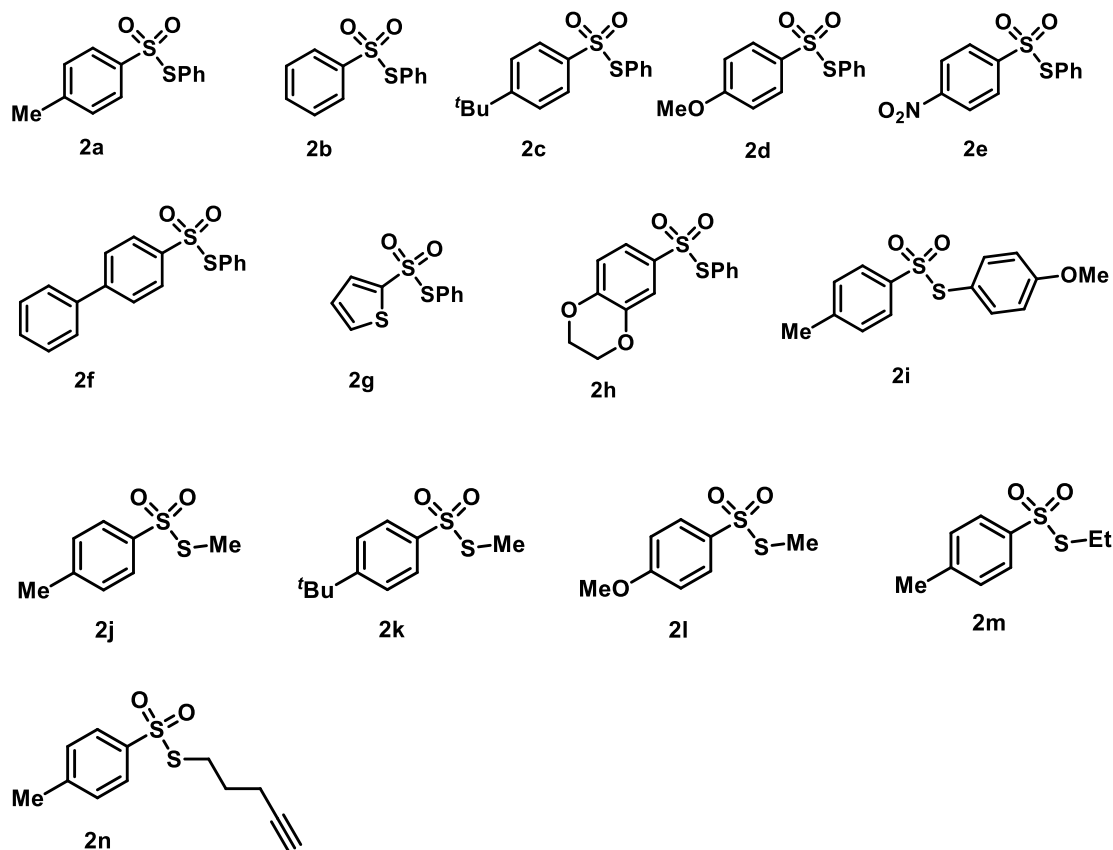

#### (4) General procedure for the synthesis of Sulfonylthioates:

Sulfonylthioates were prepared following the reported procedure.<sup>4</sup> A mixture of sulfinic acid sodium salt (4.0 mmol), diselenide (1.0 mmol), and NBS (2.0 mmol, 356 mg) in MeCN was stirred at room temperature. After the completion of the reaction, as monitored by TLC, the reaction mixture was washed with water and extracted with ethyl acetate. The organic phase was separated, dried over anhydrous  $\text{Na}_2\text{SO}_4$ , and then filtered. The filtrate was concentrated under reduced pressure and the resulting residue was purified by column chromatography to provide **4** in 90% yield as a white solid.

**(5) General procedure for the Radical cascade sulfonation and thiolation:**

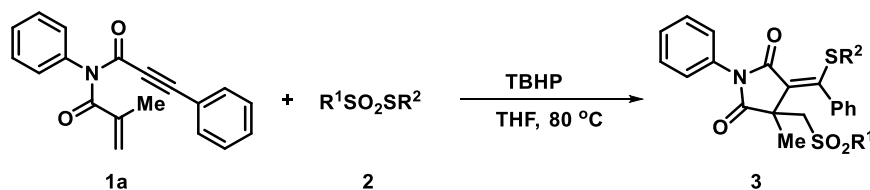

An oven-dried seal tube equipped with a magnetic stir bar was charged with **1a** (100 mg, 0.346 mmol) and **2** (0.692 mmol), then THF (10 mL) was added before adding 70% TBHP in water (133  $\mu$ L, 1.038 mmol). The reaction mixture was then stirred at 80 °C oil bath for 3hrs (monitored reactions by TLC). Afterwards the solvent was removed under reduced pressure and the resulting residue was purified by silica gel column chromatography to afford pure product **3**.

**(6) Standardization of reaction conditions**

We initiated our investigation using *N*-phenyl-*N*-(3-phenylpropioloyl)acrylamide **1a** and *S*-phenyl 4-methylbenzenesulfonothioate **2a** as a model substrate (Table 1). In the reaction of **1a** with **2a** (3.0 equiv) using 3.0 equiv of TBHP in dioxane at 80 °C for 3 h, the desired product **3aa** was obtained in 76% yield (Table 1, entry 1). The reaction showed high diastereoselectivity as the sole *E*-isomer of **3aa** was formed. The structure of **3aa** was further confirmed by single-crystal XRD.

**Table S1.** Optimization of Reaction Conditions<sup>a</sup>

| Entry | TolSO <sub>2</sub> SPh<br>(x equiv) | Oxidant | Solvent          | Yield <sup>b</sup> (%) |
|-------|-------------------------------------|---------|------------------|------------------------|
| 1     | 3                                   | TBHP    | Dioxane          | 76%                    |
| 2     | 3                                   | TBHP    | ACN              | 62%                    |
| 3     | 3                                   | TBHP    | EtOH             | 46%                    |
| 4     | 3                                   | TBHP    | THF              | 87%                    |
| 5     | 3                                   | TBHP    | DMF              | traces                 |
| 6     | 3                                   | TBHP    | DMSO             | NR                     |
| 7     | 3                                   | TBHP    | H <sub>2</sub> O | 45%                    |

|          |          |                                              |            |                                                     |
|----------|----------|----------------------------------------------|------------|-----------------------------------------------------|
| <b>8</b> | <b>2</b> | <b>TBHP</b>                                  | <b>THF</b> | <b>87%</b>                                          |
| 9        | 1.5      | TBHP                                         | THF        | 75%                                                 |
| 10       | 1.2      | TBHP                                         | THF        | 70%                                                 |
| 11       | 2        | TBHP                                         | THF        | 58 <sup>c</sup> , 37 <sup>d</sup> , 82 <sup>e</sup> |
| 12       | 2        | TBHP                                         | THF        | 67 <sup>f</sup> , 75 <sup>g</sup>                   |
| 13       | 2        | DTBP                                         | THF        | 68                                                  |
| 14       | 2        | K <sub>2</sub> S <sub>2</sub> O <sub>8</sub> | THF        | 72                                                  |
| 15       | 2        | PIDA                                         | THF        | 53                                                  |
| 16       | 2        | TBHP                                         | THF        | 81 <sup>h</sup>                                     |
| 17       | 2        | -                                            | THF        | NR                                                  |
| 18       | 2        | TBHP                                         | THF        | 72 <sup>i</sup> , 54 <sup>j</sup>                   |

<sup>a</sup>Reaction Conditions: **1a** (1.0 equiv), TolSO<sub>2</sub>SPh (**2a**) and Oxidant in solvent at 80 °C for 3 h under air atmosphere. <sup>b</sup>Isolated yield of **3aa**, <sup>c</sup>60 °C, <sup>d</sup>40 °C, <sup>e</sup>100 °C, <sup>f</sup>2 h, <sup>g</sup>6 h, <sup>h</sup>N<sub>2</sub> atmosphere. <sup>i</sup>2 & <sup>j</sup>1 equiv. of TBHP used.

From entries 2-7 in table 1, it is apparent that the solvent has a substantial role in the success of the reaction. THF was found to be the most appropriate solvent for the reaction, as product **3aa** obtained in 87% yield (Table 1, entry 4). A highly polar solvent such as DMF and DMSO was found unsuitable for the reaction (Table 1, entries 5,6). Decreasing the amount of sulfonothioate **2a** from 3.0 equiv to 2.0 equiv did not affect the yield of the reaction and afforded product **3aa** in 87% yield (Table 1, entry 8). Furthermore, decreasing the amount of **2a** to 1.5 and 1.2 equivalents resulted in a decreased yield of the product i.e., 75% and 70% respectively (Table 1, entries 9,10). Lowering the temperature from 80°C to 60°C and 40°C led to incomplete conversion of substrates and provided the desired product **3aa** in 58% and 37% respectively however, elevation in temperature up to 100 °C gave the product in slightly lower amount (Table 1, entry 11). When the reaction was performed for 2 h, the formation of product **3aa** was observed in a lower yield (67%); while running the reaction for 6 h resulted the product in a 75% yield (Table 1, entry 12). Screening of other oxidants such as DTBP, K<sub>2</sub>S<sub>2</sub>O<sub>8</sub>, and PIDA was found inferior for the reaction



(Table 1, entries 13-15). Performing the reaction in an inert atmosphere (nitrogen atmosphere) did not affect the yield of product **3aa** (Table 1, entry 16). In the absence of an oxidant, no product was formed (Table 1, entry 17). Lowering the amount of TBHP to 2.0 equiv and 1.0 equiv yielded the product in lower yields, 72 % and 54 % respectively (Table 1, entry 18).

### (7) Control Experiments:

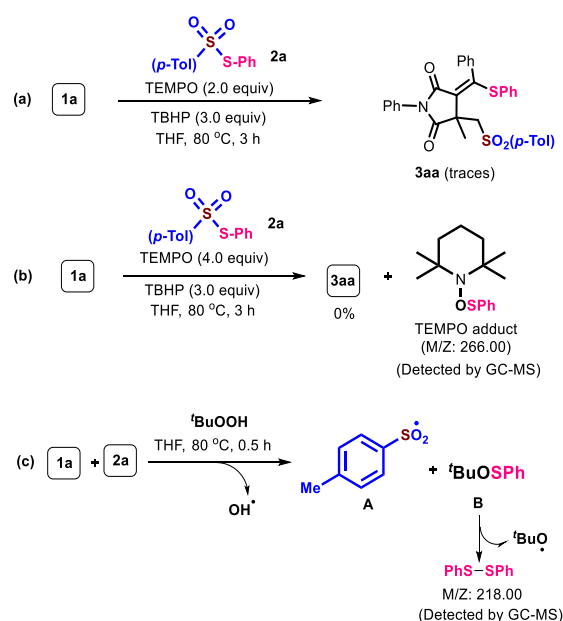

**Scheme S1.** Control Experiments

### (8) Characterization Data for the Products 1,2,3,5:

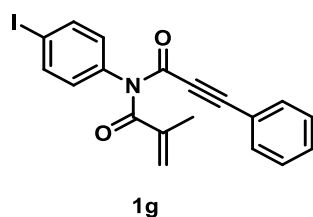

**N-(4-iodophenyl)-N-(3-phenylpropioloyl)methacrylamide (1g):** Purification by silica gel chromatography (PE:EA=95:5) afforded the desired **1g** as yellow solid in 60% yield (1.87 g), mp 90-92 °C;  $^1\text{H-NMR}$  (100 MHz,  $\text{CDCl}_3$ )  $\delta$  7.98 (dd,  $J = 8.0, 1.4$  Hz, 1H), 7.47 (td,  $J = 7.6, 1.4$  Hz, 1H), 7.42-7.34 (m, 2H), 7.31-7.27 (m, 2H), 7.22-7.15 (m, 3H), 5.77 (s, 1H), 5.48 (d,  $J = 2.1$  Hz, 1H), 2.14 (q,  $J = 0.8$  Hz, 3H);  $^{13}\text{C-NMR}$  (100 MHz,  $\text{CDCl}_3$ )  $\delta$  171.9, 154.0, 141.5,

140.8, 140.1, 133.1, 131.1, 130.8, 129.5, 128.7, 121.2, 119.4, 100.4, 94.7, 82.8, 19.3; **MS** (ESI)  $m/z$  416  $[M+H]^+$ ; HRMS Calculated for  $C_{19}H_{15}INO_2^+$  416.0142; Found: 416.0143.  $[M+H]^+$ .

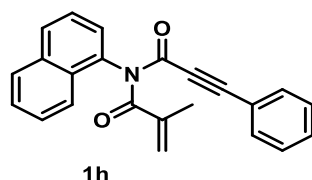

***N*-(naphthalen-1-yl)-*N*-(3-phenylpropioloyl)methacrylamide (1h):** Purification by silica gel chromatography (PE:EA=95:5) afforded the desired **1h** as yellow liquid in 70% yield (1.79 g); **<sup>1</sup>H-NMR** (400 MHz,  $CDCl_3$ )  $\delta$  7.97-7.91 (m, 3H), 7.60-7.47 (m, 4H), 7.33-7.29 (m, 1H), 7.21-7.17 (m, 2H), 7.01-6.99 (m, 2H), 5.78 (s, 1H), 5.50 (d,  $J = 1.5$  Hz, 1H), 2.12-2.16 (3H); **<sup>13</sup>C-NMR** (100 MHz,  $CDCl_3$ )  $\delta$  173.2, 155.2, 141.5, 134.6, 132.9, 131.3, 130.9, 130.0, 128.7, 128.5, 127.7, 127.6, 126.8, 125.6, 122.4, 121.4, 119.4, 94.3, 83.0, 19.3; **MS** (ESI)  $m/z$  340  $[M+H]^+$ ; HRMS Calculated for  $C_{23}H_{18}NO_2^+$  340.1332; Found: 340.1332.  $[M+H]^+$ .

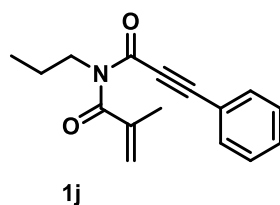

***N*-(3-phenylpropioloyl)-*N*-propylmethacrylamide (1j):** Purification by silica gel chromatography (PE:EA=98:2) afforded the desired **1j** as colourless oil in 85% yield (1.63 g); **<sup>1</sup>H-NMR** (400 MHz,  $CDCl_3$ )  $\delta$  7.51-7.48 (m, 2H), 7.45-7.41 (m, 1H), 7.38-7.34 (m, 2H), 5.47-5.46 (m, 2H), 3.83-3.80 (m, 2H), 2.06 (t,  $J = 1.2$  Hz, 3H), 1.72-1.62 (m, 2H), 0.94 (t,  $J = 7.4$  Hz, 3H); **<sup>13</sup>C-NMR** (100 MHz,  $CDCl_3$ )  $\delta$  174.6, 155.2, 142.7, 132.5, 130.8, 128.8, 121.8, 93.7, 83.1, 46.8, 22.1, 19.0, 11.5; **MS** (ESI)  $m/z$  256  $[M+H]^+$ ; HRMS Calculated for  $C_{16}H_{18}NO_2^+$  256.1332; Found: 256.1343.  $[M+H]^+$ .

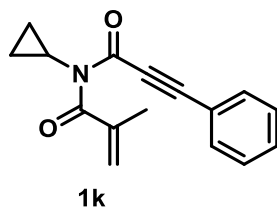

***N*-cyclopropyl-*N*-(3-phenylpropioloyl)methacrylamide (1k):** Purification by silica gel chromatography (PE:EA=98:2) afforded the desired **1k** as yellow semisolid in 80% yield (1.52 g); **<sup>1</sup>H-NMR** (400 MHz, CDCl<sub>3</sub>)  $\delta$  7.53-7.51 (m, 2H), 7.45-7.41 (m, 1H), 7.38-7.34 (m, 2H), 5.54-5.52 (m, 2H), 2.91-2.86 (m, 1H), 2.01 (s, 3H), 1.07 (q,  $J$  = 6.8 Hz, 2H), 0.75-0.71 (m, 2H); **<sup>13</sup>C-NMR** (100 MHz, CDCl<sub>3</sub>)  $\delta$  175.3, 155.7, 142.4, 132.7, 130.8, 128.7, 123.2, 120.0, 93.3, 82.8, 28.1, 18.3, 9.2; **MS** (ESI)  $m/z$  254 [M+H]<sup>+</sup>; HRMS Calculated for C<sub>16</sub>H<sub>16</sub>NO<sub>2</sub><sup>+</sup> 254.1176; Found: 254.1197. [M+H]<sup>+</sup>.

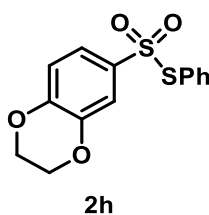

***S*-phenyl 2,3-dihydrobenzo[*b*][1,4]dioxine-6-sulfonothioate (2h):** Purification by silica gel chromatography (PE:EA=95:5) afforded the desired **2h** as white solid in 75% yield (1.48 g), mp 92-94 °C; **<sup>1</sup>H-NMR** (400 MHz, CDCl<sub>3</sub>)  $\delta$  7.50-7.45 (m, 1H), 7.41-7.33 (m, 4H), 7.12 (d,  $J$  = 2.2 Hz, 1H), 7.00 (dd,  $J$  = 8.6, 2.3 Hz, 1H), 6.82 (d,  $J$  = 8.7 Hz, 1H), 4.32-4.30 (m, 2H), 4.27-4.25 (m, 2H); **<sup>13</sup>C-NMR** (100 MHz, CDCl<sub>3</sub>)  $\delta$  148.4, 143.3, 136.7, 135.6, 131.5, 129.5, 128.2, 121.6, 117.3, 117.3, 64.7, 64.2; **MS** (ESI)  $m/z$  326 [M+NH<sub>4</sub>]<sup>+</sup>; HRMS Calculated for C<sub>14</sub>H<sub>16</sub>NO<sub>4</sub>S<sub>2</sub><sup>+</sup> 326.0515; Found: 326.0528. [M + NH<sub>4</sub>]<sup>+</sup>.

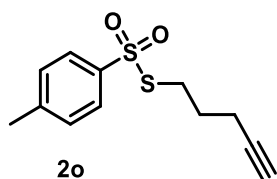

**S-(pent-4-yn-1-yl) 4-methylbenzenesulfonothioate (2n):** Purification by silica gel chromatography (PE:EA=95:5) afforded the desired **2o** as colourless oil in 70% yield (3.56 g); <sup>1</sup>H-NMR (400 MHz, CDCl<sub>3</sub>) δ 7.74 (d, *J* = 8.2 Hz, 2H), 7.28 (d, *J* = 8.0 Hz, 2H), 3.03 (t, *J* = 7.3 Hz, 2H), 2.37 (s, 3H), 2.17 (td, *J* = 6.8, 2.6 Hz, 2H), 1.92 (t, *J* = 2.7 Hz, 1H), 1.80-1.73 (m, 2H); <sup>13</sup>C-NMR (101 MHz, CDCl<sub>3</sub>) δ 145.0, 141.8, 130.0, 127.1, 82.4, 34.7, 27.5, 21.7, 17.3; MS (ESI) *m/z* 255 [M+H]<sup>+</sup>; HRMS Calculated for C<sub>12</sub>H<sub>15</sub>O<sub>2</sub>S<sub>2</sub><sup>+</sup> 255.0508; Found: 255.1176. [M+H]<sup>+</sup>.

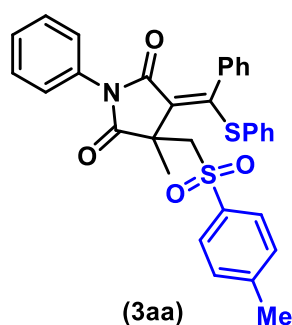

**(E)-3-methyl-1-phenyl-4-(phenyl(phenylthio)methylene)-3-tosylmethylpyrrolidine-2,5-dione (3aa):** Purification by silica gel chromatography (PE:EA=88:12) afforded the desired **3aa** as white solid in 87% yield (166.5 mg), mp 201-203 °C; <sup>1</sup>H-NMR (400 MHz, CDCl<sub>3</sub>) δ 7.87 (d, *J* = 8.4 Hz, 2H), 7.43-7.38 (m, 8H), 7.36-7.31 (m, 2H), 7.23 (s, 1H), 7.15-7.08 (m, 6H), 4.84 (d, *J* = 13.9 Hz, 1H), 3.93 (d, *J* = 14.0 Hz, 1H), 2.46 (s, 3H), 1.84 (s, 3H); <sup>13</sup>C-NMR (125 MHz, CDCl<sub>3</sub>) δ 177.5, 165.1, 157.4, 145.0, .1378, 135.4, 135.2, 132.2, 130.1, 129.2, 128.9, 128.8, 128.7, 128.5, 128.4, 127.9, 127.4, 127.0, 123.1, 57.8, 46.5, 24.3, 21.7. MS (ESI) *m/z* 554 [M+H]<sup>+</sup>; HRMS Calculated for C<sub>32</sub>H<sub>28</sub>NO<sub>4</sub>S<sub>2</sub><sup>+</sup> 554.1454; Found: 554.1454. [M+H]<sup>+</sup>.

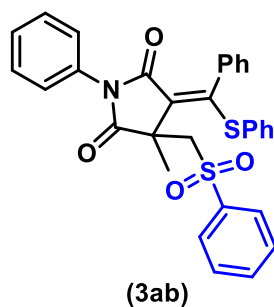

**(E)-3-methyl-1-phenyl-4-(phenyl(phenylthio)methylene)-3-**

**((phenylsulfonyl)methyl)pyrrolidine-2,5-dione (3ab):** Purification by silica gel chromatography (PE:EA=88:12) afforded the desired **3ab** as white solid in 84% yield (157 mg), mp 198-200 °C; <sup>1</sup>H-NMR (400 MHz, CDCl<sub>3</sub>) δ 8.01 (d, *J* = 8.0 Hz, 2H), 7.70-7.66 (m, 1H), 7.61-7.57 (m, 2H), 7.44-7.40 (m, 6H), 7.36-7.32 (m, 1H), 7.23-7.11 (m, 8H), 4.87 (d, *J* = 14 Hz, 1H), 3.95 (d, *J* = 14 Hz, 1H), 1.85 (s, 3H). <sup>13</sup>C-NMR (100 MHz, CDCl<sub>3</sub>) δ 177.5, 165.1, 157.5, 140.7, 135.3, 135.2, 133.9, 132.2, 129.5, 129.1, 128.9, 128.8, 128.7, 128.5, 128.4, 127.8, 127.5, 127.0, 123.1, 57.7, 46.5, 24.3. MS (ESI) *m/z* 540 [M+H]<sup>+</sup>; HRMS Calculated for C<sub>31</sub>H<sub>26</sub>NO<sub>4</sub>S<sub>2</sub><sup>+</sup> 540.1303; Found: 540.1298. [M+H]<sup>+</sup>.

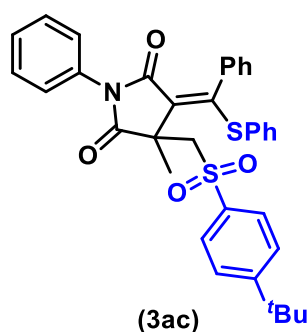

**(E)-3-(((4-(tert-butyl)phenyl)sulfonyl)methyl)-3-methyl-1-phenyl-4-**

**(phenyl(phenylthio)methylene)pyrrolidine-2,5-dione (3ac):** Purification by silica gel chromatography (PE:EA=88:12) afforded the desired **3ac** as white solid in 82% yield (169 mg), mp 200-202 °C; <sup>1</sup>H NMR (400 MHz, CDCl<sub>3</sub>) δ 7.91 (d, *J* = 6.7 Hz, 2H), 7.58 (d, *J* = 8.7 Hz, 2H), 7.41-7.30 (m, 8H), 7.23 (d, *J* = 15.1 Hz, 1H), 7.16-7.06 (m, 6H), 4.85 (d, *J* = 14.0 Hz, 1H), 3.94 (d, *J* = 14.2 Hz, 1H), 1.84 (s, 3H), 1.35 (s, 9H); <sup>13</sup>C NMR (100 MHz, CDCl<sub>3</sub>) δ 177.6, 165.2, 157.9, 157.4, 137.7, 135.4, 135.2, 132.3, 129.2, 128.9, 128.9, 128.7, 128.6, 128.5, 127.8, 127.5, 127.1, 126.5, 123.2, 57.8, 46.5, 35.4, 31.2, 24.4. MS (ESI) *m/z* 596 [M+H]<sup>+</sup>; HRMS Calculated for C<sub>35</sub>H<sub>34</sub>NO<sub>4</sub>S<sub>2</sub><sup>+</sup> 596.1924; Found: 596.1910. [M+H]<sup>+</sup>.

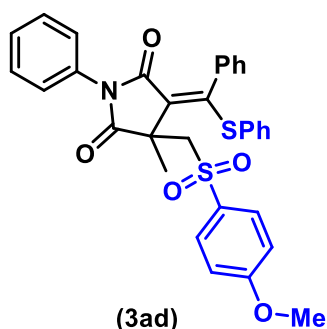

**(E)-3-(((4-methoxyphenyl)sulfonyl)methyl)-3-methyl-1-phenyl-4-**

**(phenyl(phenylthio)methylene)pyrrolidine-2,5-dione (3ad):** Purification by silica gel chromatography (PE:EA=88:12) afforded the desired **3ad** as yellow solid in 87% yield (171 mg), mp 168-170 °C; <sup>1</sup>H-NMR (400 MHz, CDCl<sub>3</sub>) δ 7.93-7.89 (m, 2H), 7.43-7.38 (m, 7H), 7.34-7.30 (m, 1H), 7.23 (s, 1H), 7.14-7.07 (m, 6H), 7.02 (dd, *J* = 6.9, 2.1 Hz, 2H), 4.83 (d, *J* = 14.0 Hz, 1H), 3.92 (d, *J* = 14.0 Hz, 1H), 3.86 (s, 3H), 1.84 (s, 3H); <sup>13</sup>C-NMR (100 MHz, CDCl<sub>3</sub>) δ 177.6, 165.2, 164.0, 157.5, 135.5, 135.2, 132.3, 130.1, 129.3, 129.1, 128.9, 128.9, 128.8, 128.6, 128.5, 127.5, 127.0, 123.2, 114.7, 58.1, 55.8, 46.6, 24.4. MS (ESI) *m/z* 570 [M+H]<sup>+</sup>; HRMS Calculated for C<sub>32</sub>H<sub>28</sub>NO<sub>5</sub>S<sub>2</sub><sup>+</sup> 570.1403; Found: 570.1392. [M+H]<sup>+</sup>.

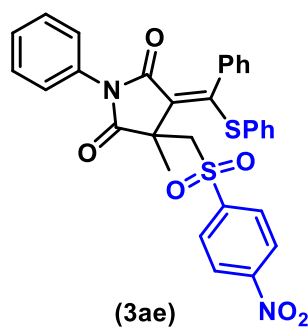

**(E)-3-methyl-3-(((4-nitrophenyl)sulfonyl)methyl)-1-phenyl-4-**

**(phenyl(phenylthio)methylene)pyrrolidine-2,5-dione (3ae):** Purification by silica gel chromatography (PE:EA=88:12) afforded the desired **3ae** as white solid in 81% yield (164 mg), mp 213-215 °C; <sup>1</sup>H-NMR (400 MHz, CDCl<sub>3</sub>) δ 8.42 (d, *J* = 8.8 Hz, 2H), 8.19 (d, *J* = 8.8 Hz, 2H), 7.44-7.32 (m, 8H), 7.19-7.17 (m, 1H), 7.16-7.08 (m, 6H), 4.97 (d, *J* = 14.0 Hz, 1H), 3.97 (d, *J* = 14.0 Hz, 1H), 1.86 (s, 3H); <sup>13</sup>C-NMR (100 MHz, CDCl<sub>3</sub>) δ 177.3, 164.8, 157.9, 151.0, 146.0, 135.1, 132.1, 129.5, 129.4, 129.2, 129.0, 128.9, 128.8, 128.7, 128.6, 127.5,

126.8, 124.7, 122.8, 57.8, 46.6, 24.2. MS (ESI)  $m/z$  585  $[M+H]^+$ ; HRMS Calculated for  $C_{31}H_{25}N_2O_6S_2^+$  585.1149; Found: 585.1141.  $[M+H]^+$ .

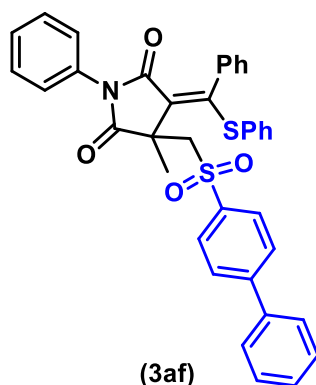

**(E)-3-(((1,1'-biphenyl)-4-ylsulfonyl)methyl)-3-methyl-4-phenyl-1-phenyl-4-(phenyl(phenylthio)methylene)pyrrolidine-2,5-dione (3af):** Purification by silica gel chromatography (PE:EA=88:12) afforded the desired **3af** as white solid in 86% yield (183 mg), mp 130-132 °C;  $^1H$ -NMR (400 MHz,  $CDCl_3$ )  $\delta$  8.05 (d,  $J$  = 8.5 Hz, 2H), 7.78 (d,  $J$  = 8.4 Hz, 2H), 7.61 (d,  $J$  = 8.4 Hz, 2H), 7.52-7.39 (m, 10H), 7.35-7.32 (m, 1H), 7.22 (s, 1H), 7.15-7.08 (m, 6H), 4.91 (d,  $J$  = 14.0 Hz, 1H), 4.00 (d,  $J$  = 14.0 Hz, 1H), 1.87 (s, 3H);  $^{13}C$ -NMR (100 MHz,  $CDCl_3$ )  $\delta$  177.4, 165.0, 157.5, 147.0, 139.2, 136.5, 135.3, 135.2, 132.2, 130.0, 129.1, 128.87, 128.83, 128.74, 128.68, 128.5, 128.4, 128.1, 127.5, 127.0, 123.1, 57.9, 46.5, 24.3. MS (ESI)  $m/z$  616  $[M+H]^+$ ; HRMS Calculated for  $C_{37}H_{30}NO_4S_2^+$  616.1611; Found: 616.1600.  $[M+H]^+$ .

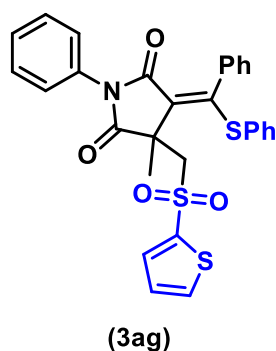

**(E)-3-methyl-1-phenyl-4-(phenyl(phenylthio)methylene)-3-((thiophen-2-ylsulfonyl)methyl)pyrrolidine-2,5-dione (3ag) :** Purification by silica gel chromatography

(PE:EA=88:12) afforded the desired **3ag** as white solid in 78% yield (147 mg), mp 210-212 °C; <sup>1</sup>H-NMR (400 MHz, CDCl<sub>3</sub>) δ 7.78-7.73 (m, 2H), 7.43-7.31 (m, 8H), 7.17 (dd, *J* = 4.9, 3.8 Hz, 2H), 7.15-7.08 (m, 6H), 5.00 (d, *J* = 13.9 Hz, 1H), 4.10 (d, *J* = 14.0 Hz, 1H), 1.87 (s, 3H); <sup>13</sup>C-NMR (100 MHz, CDCl<sub>3</sub>) δ 177.2, 165.0, 157.8, 141.8, 135.4, 135.2, 134.4, 134.2, 132.2, 129.6, 129.1, 128.9, 128.8, 128.6, 128.5, 128.2, 127.5, 127.0, 122.9, 59.2, 46.6, 24.4. **MS** (ESI) *m/z* 546 [M+H]<sup>+</sup>; HRMS Calculated for C<sub>29</sub>H<sub>24</sub>NO<sub>4</sub>S<sub>3</sub><sup>+</sup> 546.0862; Found: 546.0879 [M+H]<sup>+</sup>.

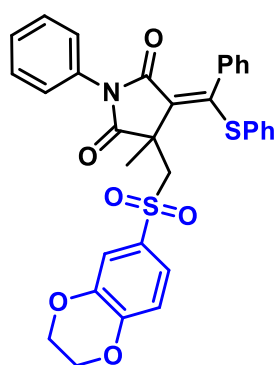

(3ah)

**(E)-3-(((2,3-dihydrobenzo[b][1,4]dioxin-6-yl)sulfonyl)methyl) 3-methyl-1-phenyl-4-(phenyl(phenylthio)methylene)pyrrolidine-2,5-dione (3ah):** Purification by silica gel chromatography (PE:EA=88:12) afforded the desired **3ah** as white solid in 82% yield (169 mg), mp 209-211 °C; <sup>1</sup>H-NMR (400 MHz, CDCl<sub>3</sub>) δ 7.48-7.39 (m, 2H), 7.36-7.23 (m, 8H), 7.19-7.15 (m, 1H), 7.09-7.01 (m, 6H), 6.94 (d, *J* = 8.4 Hz, 1H), 4.75 (d, *J* = 14.0 Hz, 1H), 4.28-4.21 (m, 4H), 3.84 (d, *J* = 14.0 Hz, 1H), 1.76 (s, 3H); <sup>13</sup>C-NMR (100 MHz, CDCl<sub>3</sub>) δ 177.4, 165.1, 157.4, 148.5, 143.8, 135.4, 135.2, 133.1, 132.2, 129.2, 128.83, 128.8, 128.7, 128.5, 128.4, 127.4, 127.0, 123.1, 121.5, 118.2, 117.5, 64.6, 64.1, 57.8, 46.4, 24.3. **MS** (ESI) *m/z* 598 [M+H]<sup>+</sup>; HRMS Calculated for C<sub>33</sub>H<sub>28</sub>NO<sub>6</sub>S<sub>2</sub><sup>+</sup> 598.1353; Found: 598.1340 [M+H]<sup>+</sup>.



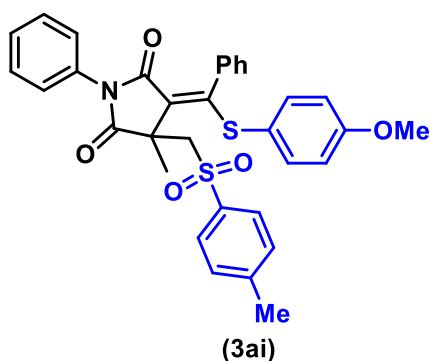

**(E)-4-(((4-methoxyphenyl)thio)(phenyl)methylene)-3-methyl-1-phenyl-3-**

**(tosylmethyl)pyrrolidine-2,5-dione (3ai):** Purification by silica gel chromatography (PE:EA=88:12) afforded the desired **3ai** as white solid in 87% yield (176 mg), mp 192-194 °C; <sup>1</sup>H-NMR (400 MHz, CDCl<sub>3</sub>) δ 7.86 (d, *J* = 8.2 Hz, 2H), 7.42-7.29 (m, 10H), 7.17 (s, 1H), 7.09 (d, *J* = 5.2 Hz, 4H), 6.64-6.60 (m, 2H), 4.86 (d, *J* = 14.0 Hz, 1H), 3.91 (d, *J* = 14.0 Hz, 1H), 3.69 (s, 3H), 2.45 (s, 3H), 1.82 (s, 3H); <sup>13</sup>C-NMR (100 MHz, CDCl<sub>3</sub>) δ 177.7, 165.1, 160.3, 158.6, 145.0, 137.9, 137.1, 135.6, 132.3, 130.1, 128.9, 128.4, 127.9, 127.6, 127.0, 122.5, 119.6, 114.3, 57.7, 55.3, 46.5, 24.3, 21.8. MS (ESI) *m/z* 584 [M+H]<sup>+</sup>; HRMS Calculated for C<sub>33</sub>H<sub>28</sub>NO<sub>6</sub>S<sub>2</sub><sup>+</sup> 584.1560; Found: 584.1546. [M+H]<sup>+</sup>.

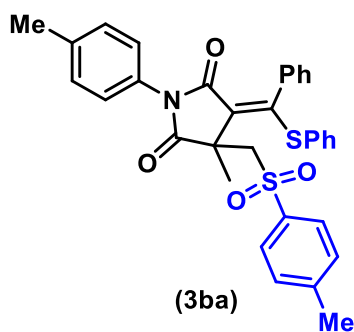

**(E)-3-methyl-4-(phenyl(phenylthio)methylene)-1-(p-tolyl)-3-(tosylmethyl)pyrrolidine-**

**2,5-dione (3ba):** Purification by silica gel chromatography (PE:EA=88:12) afforded the desired **3ba** as yellow solid in 84% yield (165 mg), mp 208-210 °C; <sup>1</sup>H-NMR (400 MHz, CDCl<sub>3</sub>) δ 7.85 (d, *J* = 8.2 Hz, 2H), 7.39-7.34 (m, 4H), 7.26-7.18 (m, 6H), 7.13-7.06 (m, 6H), 4.82 (d, *J* = 14.0 Hz, 1H), 3.91 (d, *J* = 14.0 Hz, 1H), 2.44 (s, 3H), 2.32 (s, 3H), 1.81 (s, 3H); <sup>13</sup>C-NMR (100 MHz, CDCl<sub>3</sub>) δ 177.6, 165.2, 157.1, 144.9, 138.3, 137.8, 135.4, 135.1, 130.0,

129.6, 129.5, 129.3, 128.8, 128.6, 128.4, 127.8, 127.4, 126.7, 123.3, 57.8, 46.5, 24.3, 21.7, 21.2. **MS** (ESI)  $m/z$  568 [M+H]<sup>+</sup>; HRMS Calculated for C<sub>33</sub>H<sub>30</sub>NO<sub>4</sub>S<sub>2</sub><sup>+</sup> 568.1611; Found: 568.1597 [M+H]<sup>+</sup>.

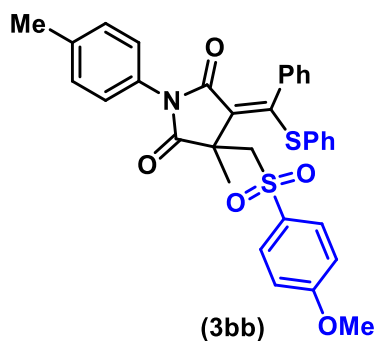

**(E)-3-(((4-methoxyphenyl)sulfonyl)methyl)-3-methyl-4-(phenyl(phenylthio)methylene)-1-(p-tolyl)pyrrolidine-2,5-dione (3bb):** Purification by silica gel chromatography (PE:EA=88:12) afforded the desired **3bb** as yellow solid in 87% yield (176 mg), mp 202-204 °C; <sup>1</sup>H-NMR (400 MHz, CDCl<sub>3</sub>) δ 7.90 (dd,  $J$  = 6.9, 2.0 Hz, 2H), 7.40-7.38 (m, 2H), 7.28-7.19 (m, 6H), 7.14-7.07 (m, 6H), 7.03-6.99 (m, 2H), 4.82 (d,  $J$  = 14.2 Hz, 1H), 3.92 (d,  $J$  = 14.2 Hz, 1H), 3.87 (s, 3H), 2.33 (s, 3H), 1.83 (s, 3H); <sup>13</sup>C-NMR (100 MHz, CDCl<sub>3</sub>) δ 177.7, 165.3, 164.0, 157.1, 138.4, 135.5, 135.2, 132.4, 130.1, 129.7, 129.6, 129.4, 128.8, 128.7, 128.5, 127.5, 126.8, 123.4, 114.7, 58.1, 55.8, 46.6, 24.4, 21.3. **MS** (ESI)  $m/z$  584 [M+H]<sup>+</sup>; HRMS Calculated for C<sub>33</sub>H<sub>30</sub>NO<sub>5</sub>S<sub>2</sub><sup>+</sup> 584.1560; Found: 584.1544 [M+H]<sup>+</sup>.

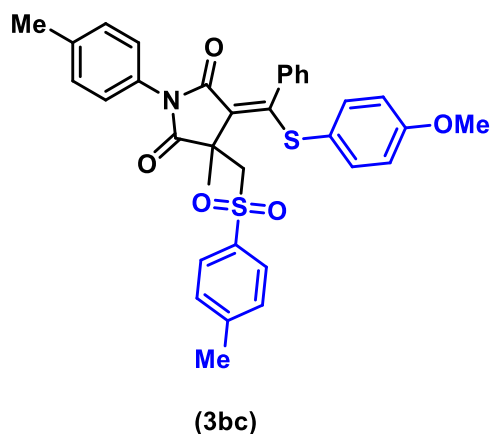

**(E)-4-(((4-methoxyphenyl)thio)(phenyl)methylene)-3-methyl-1-(p-tolyl)-3-(tosylmethyl)pyrrolidine-2,5-dione (3bc):** Purification by silica gel chromatography

(PE:EA=88:12) afforded the desired **3bc** as white solid in 86% yield (178 mg), mp 226-228 °C; **<sup>1</sup>H-NMR** (400 MHz, CDCl<sub>3</sub>) δ 7.86 (d, *J* = 8.2 Hz, 2H), 7.36 (d, *J* = 8.1 Hz, 2H), 7.32-7.28 (m, 2H), 7.24 (d, *J* = 6.6 Hz, 3H), 7.19 (d, *J* = 8.4 Hz, 3H), 7.10-7.05 (m, 3H), 6.62 (d, *J* = 8.8 Hz, 2H), 4.85 (d, *J* = 14.0 Hz, 1H), 3.90 (d, *J* = 14.0 Hz, 1H), 3.68 (d, *J* = 8.7 Hz, 3H), 2.45 (s, 3H), 2.32 (s, 3H), 1.81 (s, 3H); **<sup>13</sup>C-NMR** (100 MHz, CDCl<sub>3</sub>) δ 177.7, 165.2, 160.2, 158.1, 144.9, 138.3, 137.9, 137.0, 135.6, 130.0, 129.6, 129.5, 128.3, 127.8, 127.5, 126.7, 122.6, 119.6, 114.2, 57.7, 55.2, 46.4, 24.2, 21.7, 21.2; **MS** (ESI) *m/z* 598 [M+H]<sup>+</sup>; HRMS Calculated for C<sub>34</sub>H<sub>32</sub>NO<sub>5</sub>S<sub>2</sub><sup>+</sup> 598.1716; Found: 598.1703 [M+H]<sup>+</sup>.

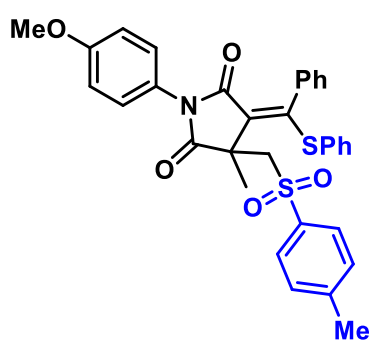

(**3bd**)

**(E)-1-(4-methoxyphenyl)-3-methyl-4-(phenyl(phenylthio)methylene)-3-**

**(tosylmethyl)pyrrolidine-2,5-dione (3bd):** Purification by silica gel chromatography (PE:EA=88:12) afforded the desired **3bd** as white solid in 87% yield (176 mg), mp 185-187 °C; **<sup>1</sup>H-NMR** (400 MHz, CDCl<sub>3</sub>) δ 7.89-7.85 (m, 2H), 7.41-7.35 (m, 4H), 7.33-7.29 (m, 2H), 7.22 (s, 1H), 7.16-7.04 (m, 7H), 6.94-6.90 (m, 2H), 4.82 (d, *J* = 14.0 Hz, 1H), 3.91 (d, *J* = 14.0 Hz, 1H), 3.77 (s, 3H), 2.45 (s, 3H), 1.82 (s, 3H); **<sup>13</sup>C-NMR** (100 MHz, CDCl<sub>3</sub>) δ 177.8, 165.4, 159.5, 157.2, 145.0, 137.9, 135.5, 135.2, 130.1, 129.3, 128.9, 128.7, 128.5, 128.2, 127.9, 127.5, 125.0, 123.3, 114.3, 57.9, 55.6, 46.5, 24.4, 21.8. **MS** (ESI) *m/z* 584 [M+H]<sup>+</sup>; HRMS Calculated for C<sub>33</sub>H<sub>30</sub>NO<sub>5</sub>S<sub>2</sub><sup>+</sup> 584.1560; Found: 584.1543 [M+H]<sup>+</sup>.

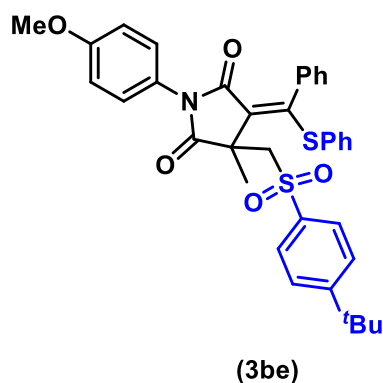

**(E)-3-(((4-(tert-butyl)phenyl)sulfonyl)methyl)-1-(4-methoxyphenyl)-3-methyl-4-(phenyl(phenylthio)methylene)pyrrolidine-2,5-dione (3be):** Purification by silica gel chromatography (PE:EA=88:12) afforded the desired **3be** as white solid in 84% yield (182 mg), mp 262-264 °C; <sup>1</sup>H-NMR (400 MHz, CDCl<sub>3</sub>) δ 7.91 (d, *J* = 8.0 Hz, 2H), 7.59 (d, *J* = 8H, 2H), 7.39 (d, *J* = 4.0 Hz, 2H), 7.32 (d, *J* = 8.0 Hz, 2H), 7.21-7.08 (m, 8H), 6.93 (d, *J* = 8.0 Hz, 2H), 4.84 (d, *J* = 16 Hz, 1H), 3.94 (d, *J* = 16 Hz, 1H), 3.79 (s, 3H), 1.84 (s, 3H), 1.36 (s, 9H); <sup>13</sup>C-NMR (100 MHz, CDCl<sub>3</sub>) δ 177.7, 165.3, 159.4, 157.9, 157.0, 137.7, 135.4, 135.1, 129.2, 128.8, 128.7, 128.4, 128.2, 127.7, 127.4, 126.5, 125.0, 123.3, 114.2, 57.9, 55.5, 46.4, 35.3, 31.1, 24.2; **MS** (ESI) *m/z* 626 [M+H]<sup>+</sup>; HRMS Calculated for C<sub>36</sub>H<sub>36</sub>NO<sub>5</sub>S<sub>2</sub><sup>+</sup> 626.2029; Found: 626.2023 [M+H]<sup>+</sup>.

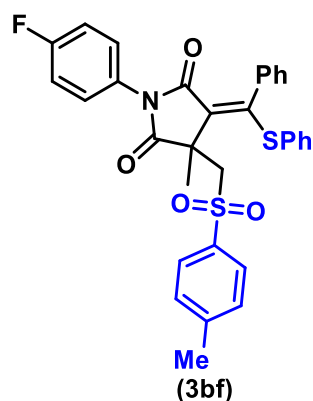

**(E)-1-(4-fluorophenyl)-3-methyl-4-(phenyl(phenylthio)methylene)-3-(tosylmethyl)pyrrolidine-2,5-dione (3bf):** Purification by silica gel chromatography (PE:EA=88:12) afforded the desired **3bf** as white solid in 80% yield (158 mg), mp 150-152 °C; <sup>1</sup>H-NMR (400 MHz, CDCl<sub>3</sub>) δ 7.87 (d, *J* = 8.2 Hz, 2H), 7.41-7.37 (m, 6H), 7.22 (s, 1H),

7.16-7.08 (m, 9H), 4.84 (d,  $J = 14.0$  Hz, 1H), 3.91 (d,  $J = 14.0$  Hz, 1H), 2.47 (s, 3H), 1.84 (s, 3H);  $^{13}\text{C-NMR}$  (100 MHz,  $\text{CDCl}_3$ )  $\delta$  177.6, 165.1, 162.3 (d,  $J = 247.3$  Hz), 158.0, 145.2, 137.7, 135.4, 135.3, 130.2, 129.1, 129.0, 128.97 (d,  $J = 8.7$  Hz), 128.8, 128.6, 128.21 ( $J = 1.9$  Hz), 127.9, 127.6, 122.9, 115.9 ( $J = 23.0$  Hz), 57.8, 46.5, 24.3, 21.8;  $^{19}\text{F NMR}$  (376 MHz,  $\text{CDCl}_3$ )  $\delta$ -112.9 (s, 1F); **MS** (ESI)  $m/z$  572  $[\text{M}+\text{H}]^+$ ; HRMS Calculated for  $\text{C}_{32}\text{H}_{27}\text{NO}_4\text{FS}_2^+$  572.1360; Found: 572.1351  $[\text{M}+\text{H}]^+$ .

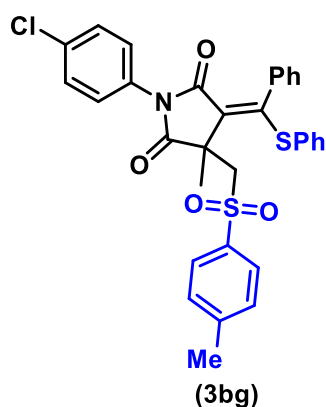

**(E)-1-(4-chlorophenyl)-3-methyl-4-(phenyl(phenylthio)methylene)-3-**

**(tosylmethyl)pyrrolidine-2,5-dione (3bg):** Purification by silica gel chromatography (PE:EA=88:12) afforded the desired **3bg** as white solid in 85% yield (173 mg), mp 192-194 °C;  $^1\text{H-NMR}$  (400 MHz,  $\text{CDCl}_3$ )  $\delta$  7.87 (d,  $J = 8.2$  Hz, 2H), 7.57 (t,  $J = 1.8$  Hz, 1H), 7.48-7.46 (m, 1H), 7.41-7.38 (m, 5H), 7.29 (t,  $J = 8.0$  Hz, 1H), 7.23 (s, 1H), 7.17-7.10 (m, 7H), 4.85 (d,  $J = 14.0$  Hz, 1H), 3.91 (d,  $J = 14.0$  Hz, 1H), 2.47 (s, 3H), 1.84 (s, 3H);  $^{13}\text{C-NMR}$  (100 MHz,  $\text{CDCl}_3$ )  $\delta$  177.3, 164.7, 158.4, 145.2, 137.7, 135.3, 133.5, 131.6, 130.2, 130.1, 129.1, 129.0, 128.8, 128.7, 127.9, 127.6, 125.8, 122.6, 122.2, 57.7, 46.5, 24.4, 21.8. **MS** (ESI)  $m/z$  588  $[\text{M}+\text{H}]^+$ ; HRMS Calculated for  $\text{C}_{32}\text{H}_{27}\text{NO}_4\text{ClS}_2^+$  588.1065; Found: 588.1048  $[\text{M}+\text{H}]^+$ .

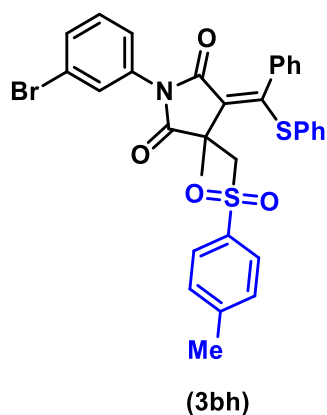

**(E)-1-(3-bromophenyl)-3-methyl-4-(phenyl(phenylthio)methylene)-3-**

**(tosylmethyl)pyrrolidine-2,5-dione (3bh):** Purification by silica gel chromatography (PE:EA=88:12) afforded the desired **3bh** as white solid in 83% yield (181 mg), mp 246-248 °C; <sup>1</sup>H-NMR (400 MHz, CDCl<sub>3</sub>) δ 7.86 (d, *J* = 8.2 Hz, 2H), 7.41-7.34 (m, 8H), 7.26 (s, 1H), 7.17-7.08 (m, 7H), 4.84 (d, *J* = 13.9 Hz, 1H), 3.90 (d, *J* = 14.0 Hz, 1H), 2.46 (s, 3H), 1.83 (s, 3H); <sup>13</sup>C-NMR (100 MHz, CDCl<sub>3</sub>) δ 177.4, 164.9, 158.3, 145.2, 137.7, 135.3, 135.2, 134.2, 130.8, 130.2, 129.1, 129.0, 128.8, 128.7, 128.4, 127.9, 127.6, 122.7, 57.8, 46.5, 24.3, 21.8. **MS** (ESI) *m/z* 632 [M+H]<sup>+</sup>; HRMS Calculated for C<sub>32</sub>H<sub>27</sub>NO<sub>4</sub>BrS<sub>2</sub><sup>+</sup> 632.0559; Found: 632.0545 [M+H]<sup>+</sup>.

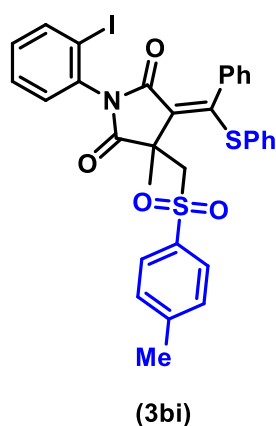

**(E)-1-(2-iodophenyl)-3-methyl-4-(phenyl(phenylthio)methylene)-3-**

**(tosylmethyl)pyrrolidine-2,5-dione (3bi):** Purification by silica gel chromatography (PE:EA=88:12) afforded the desired **3bi** as white solid in 77% yield (181 mg), mp 236-238

°C;  $^1\text{H-NMR}$  (400 MHz,  $\text{CDCl}_3$ )  $\delta$  7.85 (d,  $J = 8.0$  Hz, 3H), 7.51 (d,  $J = 7.8$  Hz, 1H), 7.43 (t,  $J = 7.6$  Hz, 1H), 7.37 (t,  $J = 5.9$  Hz, 4H), 7.21 (s, 1H), 7.14-7.07 (m, 8H), 4.81 (d,  $J = 14.0$  Hz, 1H), 3.95 (d,  $J = 14.3$  Hz, 1H), 2.46 (s, 3H), 1.94 (s, 3H);  $^{13}\text{C-NMR}$  (100 MHz,  $\text{CDCl}_3$ )  $\delta$  176.6, 164.3, 157.7, 145.0, 139.2, 138.0, 135.6, 135.2, 135.2, 130.8, 130.1, 130.0, 129.6, 129.3, 128.9, 128.7, 128.6, 127.9, 127.5, 123.4, 98.0, 58.3, 47.1, 23.7, 21.8. **MS** (ESI)  $m/z$  680  $[\text{M}+\text{H}]^+$ ; HRMS Calculated for  $\text{C}_{32}\text{H}_{27}\text{NO}_4\text{BrS}_2^+$  680.0421; Found: 680.0425  $[\text{M}+\text{H}]^+$ .

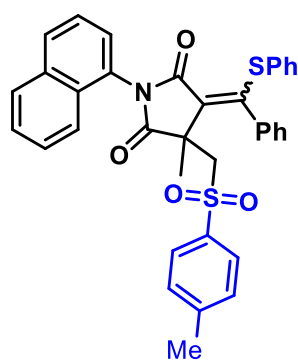

(3bj)

**(Z)/(E)-3-methyl-1-(naphthalen-1-yl)-4-(phenyl(phenylthio)methylene)-3-**

**(tosylmethyl)pyrrolidine-2,5-dione (3bj):** Purification by silica gel chromatography (PE:EA=88:12) afforded the desired **3bj** as white solid in 87% yield (182 mg), mp 188-190 °C;  $^1\text{H-NMR}$  (400 MHz,  $\text{CDCl}_3$ )  $\delta$  8.418-8.397 (d,  $J = 8.4, 0.51$ ), 7.92-7.85 (m, 6H), 7.59-7.52 (m, 2H), 7.50-7.44 (m, 5H), 7.36 (dd,  $J = 12.1, 8.1$  Hz, 2H), 7.16-7.13 (m, 3H), 7.07 (d,  $J = 7.8$  Hz, 3H), 4.97 (d, 0.29H), 4.91 (d,  $J = 14.2$  Hz, 1H), 4.05 (d,  $J = 14.2$  Hz, 0.48H), 4.01 (d,  $J = 13.9$  Hz, 1H), 2.46 (s, 3H), 2.44 (s, 1.12H), 2.01 (s, 3H), 1.90 (s, 1.21H);  $^{13}\text{C-NMR}$  (100 MHz,  $\text{CDCl}_3$ )  $\delta$  178.1, 178.0, 171.3, 165.7, 165.6, 157.6, 157.3, 145.1, 138.2, 138.0, 135.5, 135.3, 135.2, 135.2, 134.5, 134.3, 130.5, 130.2, 130.0, 129.9, 129.6, 129.4, 129.3, 129.1, 128.9, 128.8, 128.7, 128.6, 128.0, 127.9, 127.9, 127.6, 127.5, 127.4, 127.0, 126.8, 126.7, 126.3, 126.1, 125.8, 125.0, 124.1, 123.7, 123.5, 122.0, 60.5, 58.1, 57.5, 47.5, 47.1, 25.2, 24.7, 21.8, 21.2, 14.3; **MS** (ESI)  $m/z$  604  $[\text{M}+\text{H}]^+$ ; HRMS Calculated for  $\text{C}_{36}\text{H}_{30}\text{NO}_4\text{S}_2^+$  604.1611; Found: 604.1623  $[\text{M}+\text{H}]^+$ .

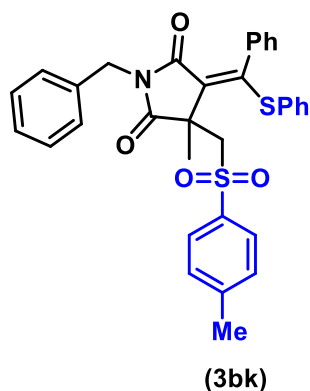

**(E)-1-benzyl-3-methyl-4-(phenyl(phenylthio)methylene)-3-(tosylmethyl)pyrrolidine-2,5-dione (3bk):** Purification by silica gel chromatography (PE:EA=88:12) afforded the desired **3bk** as white solid in 86% yield (169 mg), mp 175-177 °C; <sup>1</sup>H-NMR (400 MHz, CDCl<sub>3</sub>) δ 7.70 (d, *J* = 8.0 Hz, 2H), 7.30-7.27 (m, 6H), 7.21-7.15 (m, 5H), 7.04 - 6.99 (m, 6H), 4.70 (d, *J* = 12 Hz, 1H), 4.61-4.53 (m, 2H), 3.78 (d, *J* = 12 Hz, 1H), 2.38 (s, 3H), 1.58 (s, 3H); <sup>13</sup>C-NMR (100 MHz, CDCl<sub>3</sub>) δ 177.7, 165.5, 156.1, 144.9, 137.7, 136.0, 135.4, 135.0, 130.0, 129.4, 129.0, 128.7, 128.63, 128.61, 128.6, 128.5, 127.9, 127.6, 127.4, 123.6, 57.4, 46.5, 42.6, 30.9, 30.9, 24.4, 21.7; MS (ESI) *m/z* 568 [M+H]<sup>+</sup>; HRMS Calculated for C<sub>33</sub>H<sub>30</sub>NO<sub>4</sub>S<sub>2</sub><sup>+</sup> 568.1611; Found: 568.1614 [M+H]<sup>+</sup>.

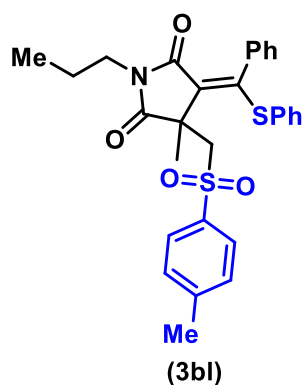

**(E)-3-methyl-4-(phenyl(phenylthio)methylene)-1-propyl-3-(tosylmethyl)pyrrolidine-2,5-dione (3bl):** Purification by silica gel chromatography (PE:EA=88:12) afforded the desired **3bl** as white solid in 88% yield (158 mg), mp 285-287 °C; <sup>1</sup>H-NMR (400 MHz, CDCl<sub>3</sub>) δ 7.84 (d, *J* = 8.0 Hz, 2H), 7.40-7.38 (m, 4H), 7.23-7.16 (m, 8H), 4.75 (d, *J* = 14.0 Hz, 1H), 3.86 (d, *J* = 14.0 Hz, 1H), 3.51-3.44 (m, 2H), 2.45 (s, 3H), 1.73 (s, 3H), 1.69-1.64 (m, 2H),



0.91 (t,  $J = 7.2$  Hz, 3H);  $^{13}\text{C-NMR}$  (100 MHz,  $\text{CDCl}_3$ )  $\delta$  178.0, 166.0, 156.0, 144.9, 137.8, 135.5, 135.1, 130.0, 129.3, 128.7, 128.6, 128.5, 127.8, 127.4, 123.8, 57.5, 46.3, 40.7, 24.4, 21.7, 20.8, 11.4. **MS** (ESI)  $m/z$  520  $[\text{M}+\text{H}]^+$ ; HRMS Calculated for  $\text{C}_{29}\text{H}_{30}\text{NO}_4\text{S}_2^+$  520.1611; Found: 520.1624  $[\text{M}+\text{H}]^+$ .

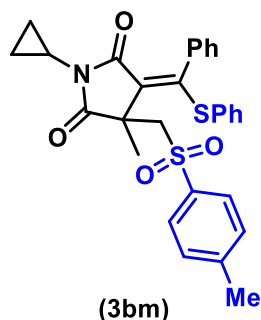

**(E)-1-cyclopropyl-3-methyl-4-(phenyl(phenylthio)methylene)-3-**

**(tosylmethyl)pyrrolidine-2,5-dione (3bm):** Purification by silica gel chromatography (PE:EA=88:12) afforded the desired **3bm** as yellow solid in 89% yield (159 mg), mp 178-180 °C;  $^1\text{H-NMR}$  (400 MHz,  $\text{CDCl}_3$ )  $\delta$  7.74 (d,  $J = 8.0$  Hz, 2H), 7.28 (t,  $J = 8$  Hz, 4H), 7.10-7.00 (m, 8H), 4.62 (d,  $J = 14$  Hz, 1H), 3.72 (d,  $J = 14$  Hz, 1H), 2.515 (q,  $J = 4$  Hz, 1H), 2.4 (s, 3H), 1.6 (s, 3H), 1.03-0.99 (m, 1H), 0.83 (t,  $J = 4$  Hz, 3H);  $^{13}\text{C-NMR}$  (100 MHz,  $\text{CDCl}_3$ )  $\delta$  178.5, 166.5, 155.7, 144.9, 137.8, 135.4, 135.1, 130.0, 129.3, 128.7, 128.6, 128.4, 127.8, 127.4, 123.4, 57.8, 45.9, 24.1, 22.4, 21.7, 5.3, 5.0; **MS** (ESI)  $m/z$  518  $[\text{M}+\text{H}]^+$ ; HRMS Calculated for  $\text{C}_{29}\text{H}_{28}\text{NO}_4\text{S}_2^+$  518.1454; Found: 518.1461  $[\text{M}+\text{H}]^+$ .

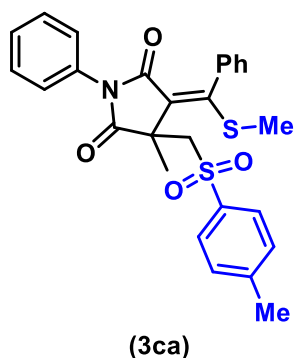

**(E)-3-methyl-4-((methylthio)(phenyl)methylene)-1-phenyl-3-(tosylmethyl)pyrrolidine-**

**2,5-dione (3ca):** Purification by silica gel chromatography (PE:EA=93:7) afforded the desired

**3ca** as white solid in 85% yield (144 mg), mp 282-284 °C;  $^1\text{H-NMR}$  (400 MHz,  $\text{CDCl}_3$ )  $\delta$  7.82 (d,  $J = 8.0$  Hz, 2H), 7.42-7.30 (m, 12H), 4.74 (d,  $J = 16$  Hz, 1H), 3.84 (d,  $J = 16$  Hz, 1H), 2.44 (s, 3H), 1.96 (s, 3H), 1.73 (s, 3H);  $^{13}\text{C-NMR}$  (100 MHz,  $\text{CDCl}_3$ )  $\delta$  177.6, 165.0, 157.8, 144.9, 137.9, 135.9, 132.2, 130.0, 128.9, 128.8, 128.4, 128.3, 127.8, 126.9, 123.7, 57.4, 46.4, 23.9, 21.7, 15.2; **MS** (ESI)  $m/z$  492  $[\text{M}+\text{H}]^+$ ; HRMS Calculated for  $\text{C}_{27}\text{H}_{26}\text{NO}_4\text{S}_2^+$  492.1298; Found: 492.1316  $[\text{M}+\text{H}]^+$ .

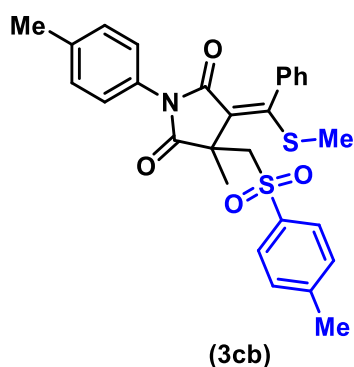

**(E)-3-methyl-4-((methylthio)(phenyl)methylene)-1-(p-tolyl)-3-(tosylmethyl)pyrrolidine-2,5-dione (3cb):** Purification by silica gel chromatography (PE:EA=93:7) afforded the desired **3cb** as white solid in 83% yield (145 mg), mp 234-236 °C;  $^1\text{H-NMR}$  (400 MHz,  $\text{CDCl}_3$ )  $\delta$  7.81 (d,  $J = 8.0$  Hz, 2H), 7.40-7.33 (m, 7H), 7.24-7.18 (m, 4H), 4.74 (d,  $J = 12.0$  Hz, 1H), 3.86 (d,  $J = 12.0$  Hz, 1H), 2.44 (s, 3H), 2.33 (s, 3H), 1.95 (s, 3H), 1.72 (s, 3H);  $^{13}\text{C-NMR}$  (100 MHz,  $\text{CDCl}_3$ )  $\delta$  177.7, 165.2, 157.5, 144.8, 138.3, 137.9, 135.9, 130.0, 129.6, 129.5, 128.8, 128.4, 127.8, 126.7, 123.9, 57.4, 46.4, 23.9, 21.7, 21.2, 15.2. **MS** (ESI)  $m/z$  506  $[\text{M}+\text{H}]^+$ ; HRMS Calculated for  $\text{C}_{28}\text{H}_{28}\text{NO}_4\text{S}_2^+$  506.1454; Found: 506.1440  $[\text{M}+\text{H}]^+$ .

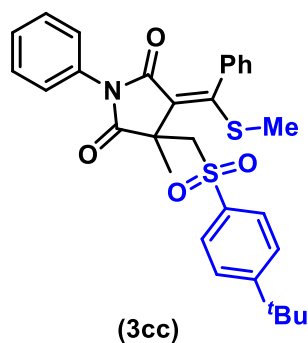

**(E)-3-(((4-(tert-butyl)phenyl)sulfonyl)methyl)-3-methyl-4-**

**((methylthio)(phenyl)methylene)-1-phenylpyrrolidine-2,5-dione (3cc):** Purification by silica gel chromatography (PE:EA=93:7) afforded the desired **3cc** as white solid in 82% yield (151 mg), mp 238-240 °C; <sup>1</sup>H-NMR (400 MHz, CDCl<sub>3</sub>) δ 7.86 (d, *J* = 8.8, 2.1 Hz, 2H), 7.56 (d, *J* = 8.8, 2.0 Hz, 2H), 7.44-7.30 (m, 10H), 4.76 (d, *J* = 14.0 Hz, 1H), 3.88 (d, *J* = 14.2 Hz, 1H), 1.95 (s, 3H), 1.73 (s, 3H), 1.34 (s, 9H); <sup>13</sup>C-NMR (100 MHz, CDCl<sub>3</sub>) δ 177.7, 165.1, 157.8, 137.8, 135.9, 132.3, 128.9, 128.5, 128.4, 127.7, 127.0, 126.5, 123.7, 57.3, 46.4, 35.4, 31.1, 23.9, 15.3. MS (ESI) *m/z* 534 [M+H]<sup>+</sup>; HRMS Calculated for C<sub>30</sub>H<sub>32</sub>NO<sub>4</sub>S<sub>2</sub><sup>+</sup> 534.1767; Found: 534.1760 [M+H]<sup>+</sup>.

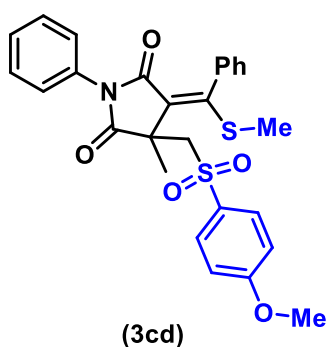

**(E)-3-(((4-methoxyphenyl)sulfonyl)methyl)-3-methyl-4-((methylthio)(phenyl)methylene)-1-phenylpyrrolidine-2,5-dione (3cd):** Purification by silica gel chromatography (PE:EA=93:7) afforded the desired **3cd** as brown solid in 88% yield (154 mg), mp 238-240 °C; <sup>1</sup>H-NMR (400 MHz, CDCl<sub>3</sub>) δ 7.86 (d, *J* = 8.0 Hz, 2H), 7.41-7.29 (m, 10H), 7.00 (d, *J* = 8.0 Hz, 2H), 4.73 (d, *J* = 12.0 Hz, 1H), 3.86 (s, 3H), 3.85 (d, *J* = 12.0 Hz, 1H), 1.96 (s, 3H), 1.73 (s, 3H); <sup>13</sup>C-NMR (100 MHz, CDCl<sub>3</sub>) δ 177.7, 165.1, 163.9, 157.8, 135.9, 132.4, 132.2, 130.0, 128.9, 128.8, 128.4, 128.3, 126.9, 123.7, 114.5, 57.6, 55.7, 46.4, 23.8, 15.23. MS (ESI) *m/z* 508 [M+H]<sup>+</sup>; HRMS Calculated for C<sub>27</sub>H<sub>26</sub>NO<sub>5</sub>S<sub>2</sub><sup>+</sup> 508.1247; Found: 508.1234 [M+H]<sup>+</sup>.

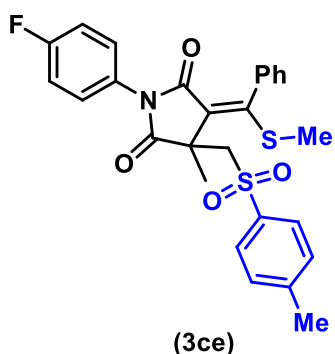

**(E)-1-(4-fluorophenyl)-3-methyl-4-((methylthio)(phenyl)methylene)-3-**

**(tosylmethyl)pyrrolidine-2,5-dione (3ce):** Purification by silica gel chromatography (PE:EA=93:7) afforded the desired **3ce** as pale yellow solid in 81% yield (143 mg), mp 218-220 °C; <sup>1</sup>H-NMR (400 MHz, CDCl<sub>3</sub>) δ 7.80 (d, *J* = 8.4 Hz, 2H), 7.46-7.30 (m, 9H), 7.10-7.04 (m, 2H), 4.72 (d, *J* = 14.0 Hz, 1H), 3.83 (d, *J* = 14.0 Hz, 1H), 2.44 (s, 3H), 1.95 (s, 3H), 1.72 (s, 3H); <sup>13</sup>C-NMR (100 MHz, CDCl<sub>3</sub>) δ 177.8, 165.1, 162.3 (*J* = 246.3), 158.4, 145.0, 137.8, 135.8, 130.1, 129.0, 128.9 (*J* = 8.7 Hz), 128.6, 128.2 (*J* = 2.3 Hz) 127.8, 123.4, 115.9, (*J* = 22 Hz), 57.4, 46.4, 23.8, 21.8, 15.3; <sup>19</sup>F NMR (376 MHz, CDCl<sub>3</sub>) δ -112.9 (s, 1F); MS (ESI) *m/z* 510 [M+H]<sup>+</sup>; HRMS Calculated for C<sub>27</sub>H<sub>25</sub>FNO<sub>4</sub>S<sub>2</sub><sup>+</sup> 510.1204; Found: 510.1222 [M+H]<sup>+</sup>.

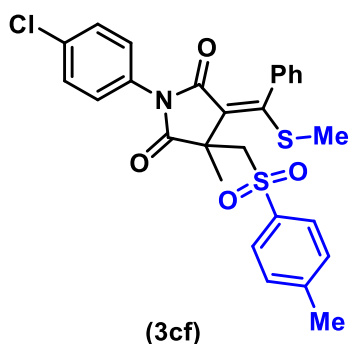

**(E)-1-(4-chlorophenyl)-3-methyl-4-((methylthio)(phenyl)methylene)-3-**

**(tosylmethyl)pyrrolidine-2,5-dione (3cf):** Purification by silica gel chromatography (PE:EA=93:7) afforded the desired **3cf** as pale yellow solid in 84% yield (153 mg), mp 219-221 °C; <sup>1</sup>H-NMR (400 MHz, CDCl<sub>3</sub>) δ 7.83 (d, *J* = 8.0 Hz, 2H), 7.40 (m, 11H), 4.76 (d, *J* = 12 Hz, 1H), 3.86 (d, *J* = 16 Hz, 1H), 2.47 (s, 3H), 1.98 (s, 3H), 1.75 (s, 3H); <sup>13</sup>C-NMR (100 MHz, CDCl<sub>3</sub>) δ 177.4, 165.7, 158.5, 145.0, 137.8, 135.8, 134.1, 130.8, 130.3, 130.0, 129.0,

128.5, 128.2, 127.8, 123.3, 57.4, 46.3, 23.8, 21.7, 15.2; **MS** (ESI)  $m/z$  526  $[M+H]^+$ ; HRMS

Calculated for  $C_{27}H_{25}ClNO_4S_2^+$  526.0908; Found: 526.0921  $[M+H]^+$ .

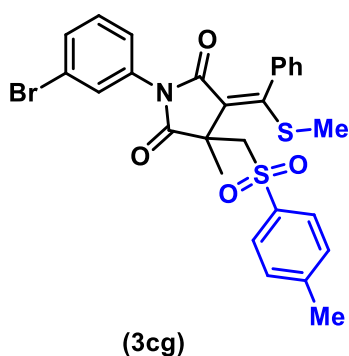

**(E)-1-(3-bromophenyl)-3-methyl-4-((methylthio)(phenyl)methylene)-3-**

**(tosylmethyl)pyrrolidine-2,5-dione (3cg):** Purification by silica gel chromatography

(PE:EA=93:7) afforded the desired **3cg** as white solid in 85% yield (167 mg), mp 212-214 °C;

**<sup>1</sup>H-NMR** (400 MHz,  $CDCl_3$ )  $\delta$  7.75 (d,  $J$  = 8.2 Hz, 2H), 7.45 (t,  $J$  = 1.9 Hz, 1H), 7.40-7.25 (m, 8H), 7.25-7.18 (m, 2H), 4.66 (d,  $J$  = 14.0 Hz, 1H), 3.77 (d,  $J$  = 14.0 Hz, 1H), 2.38 (s, 3H),

1.90 (s, 3H), 1.66 (s, 3H); **<sup>13</sup>C-NMR** (100 MHz,  $CDCl_3$ )  $\delta$  177.3, 164.6, 158.6, 145.0, 137.7, 135.8, 133.4, 131.5, 130.0, 130.0, 129.0, 128.5, 127.8, 125.7, 123.2, 122.1, 57.3, 46.4, 23.8,

21.7, 15.3. **MS** (ESI)  $m/z$  570  $[M+H]^+$ ; HRMS Calculated for  $C_{27}H_{25}BrNO_4S_2^+$  570.0403;

Found: 570.0414  $[M+H]^+$ .

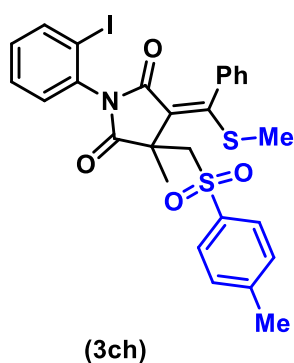

**(E)-1-(2-iodophenyl)-3-methyl-4-((methylthio)(phenyl)methylene)-3-**

**(tosylmethyl)pyrrolidine-2,5-dione (3ch):** Purification by silica gel chromatography

(PE:EA=93:7) afforded the desired **3ch** as white solid in 80% yield (171 mg), mp 265-267 °C;

**<sup>1</sup>H-NMR** (400 MHz,  $CDCl_3$ )  $\delta$  7.84 (dd,  $J$  = 13.5, 8.0 Hz, 3H), 7.48-7.35 (m, 9H), 7.09 (t,  $J$  =

6.9 Hz, 1H), 4.73 (d,  $J = 14.0$  Hz, 1H), 3.89 (d,  $J = 14.0$  Hz, 1H), 2.46 (s, 3H), 1.97 (s, 3H), 1.84 (s, 3H);  $^{13}\text{C-NMR}$  (100 MHz,  $\text{CDCl}_3$ )  $\delta$  176.6, 164.1, 158.0, 144.8, 139.1, 138.0, 135.7, 135.6, 130.6, 130.0, 129.9, 129.5, 128.9, 128.4, 127.7, 123.9, 97.9, 57.8, 46.9, 23.3, 21.7, 15.2; **MS** (ESI)  $m/z$  618  $[\text{M}+\text{H}]^+$ ; HRMS Calculated for  $\text{C}_{27}\text{H}_{25}\text{INO}_4\text{S}_2^+$  618.0264; Found: 618.0282  $[\text{M}+\text{H}]^+$ .

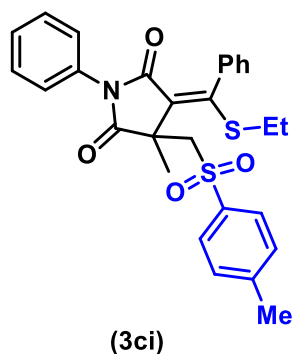

**(E)-4-((ethylthio)(phenyl)methylene)-3-methyl-1-phenyl-3-(tosylmethyl)pyrrolidine-2,5-dione (3ci):** Purification by silica gel chromatography (PE:EA=93:7) afforded the desired **3ci** as brown solid in 85% yield (149 mg), mp 190-192 °C;  $^1\text{H-NMR}$  (400 MHz,  $\text{CDCl}_3$ )  $\delta$  7.82 (d,  $J = 8.0$  Hz, 2H), 7.42-7.30 (m, 12H), 4.735 (d,  $J = 12$  Hz, 1H), 3.835 (d,  $J = 12$  Hz, 1H), 2.51-2.45 (m, 1H), 2.45 (s, 3H), 2.40-2.34 (m, 1H), 1.75 (s, 3H), 1.17 (t,  $J = 8.0$  Hz, 3H);  $^{13}\text{C-NMR}$  (100 MHz,  $\text{CDCl}_3$ )  $\delta$  177.6, 166.1, 157.7, 144.9, 137.9, 136.2, 132.3, 130.1, 129.0, 128.9, 128.4, 128.3, 127.9, 127.0, 123.5, 57.7, 46.4, 27.0, 23.9, 21.7, 14.7; **MS** (ESI)  $m/z$  506  $[\text{M}+\text{H}]^+$ ; HRMS Calculated for  $\text{C}_{28}\text{H}_{28}\text{NO}_4\text{S}_2^+$  506.1454; Found: 506.1460  $[\text{M}+\text{H}]^+$ .

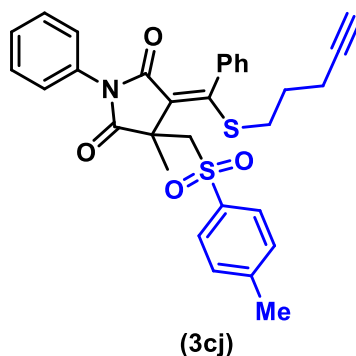

**(E)-3-methyl-4-((pent-4-yn-1-ylthio)(phenyl)methylene)-1-phenyl-3-**

**(tosylmethyl)pyrrolidine-2,5-dione (3cj):** Purification by silica gel chromatography (PE:EA=93:7) afforded the desired **3cj** as brown solid in 85% yield (160 mg), mp 158-160 °C; <sup>1</sup>H-NMR (400 MHz, CDCl<sub>3</sub>) δ 7.81 (d, *J* = 8.2 Hz, 2H), 7.41-7.29 (m, 12H), 4.69 (d, *J* = 14.0 Hz, 1H), 3.82 (d, *J* = 13.9 Hz, 1H), 2.61-2.49 (m, 2H), 2.44 (s, 3H), 2.26-2.15 (m, 2H), 1.91 (t, *J* = 2.6 Hz, 1H), 1.73 (s, 3H), 1.69 (qd, *J* = 7.0, 2.5 Hz, 2H); <sup>13</sup>C-NMR (100 MHz, CDCl<sub>3</sub>) δ 177.5, 165.0, 157.1, 144.9, 137.8, 135.7, 132.2, 130.0, 129.2, 129.0, 128.8, 128.4, 127.8, 127.0, 123.8, 82.8, 69.3, 57.6, 46.3, 31.3, 28.3, 23.9, 21.7, 17.4; **MS** (ESI) *m/z* 544 [M+H]<sup>+</sup>; HRMS Calculated for C<sub>29</sub>H<sub>28</sub>NO<sub>4</sub>S<sub>2</sub><sup>+</sup> 544.1611; Found: 544.1620 [M+H]<sup>+</sup>.

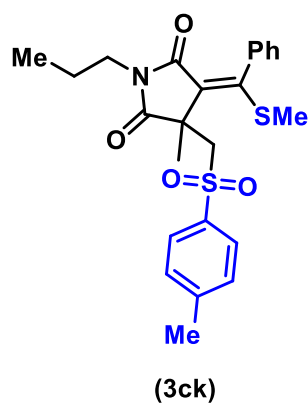

**(E)-3-methyl-4-((methylthio)(phenyl)methylene)-1-propyl-3-(tosylmethyl)pyrrolidine-**

**2,5-dione (3ck):** Purification by silica gel chromatography (PE:EA=93:7) afforded the desired **3ck** as pale yellow solid in 80% yield (127 mg), mp 153-155 °C; <sup>1</sup>H-NMR (400 MHz, CDCl<sub>3</sub>) δ 7.79 (d, *J* = 8.0 Hz, 2H), 7.46-7.44 (m, 3H), 7.37 (d, *J* = 7.6 Hz, 4H), 4.66 (d, *J* = 14.0 Hz, 1H), 3.80 (d, *J* = 14.0 Hz, 1H), 3.49-3.37 (m, 2H), 2.47 (s, 3H), 1.95 (s, 3H), 1.66-1.59 (m, 2H), 0.89 (t, *J* = 7.2 Hz, 3H); <sup>13</sup>C-NMR (100 MHz, CDCl<sub>3</sub>) δ 178.2, 165.9, 155.9, 144.8, 137.9, 136.0, 129.9, 128.9, 128.3, 127.8, 124.3, 57.02, 46.2, 40.6, 24.01, 21.6, 20.7, 15.1, 11.3; **MS** (ESI) *m/z* 458 [M+H]<sup>+</sup>; HRMS Calculated for C<sub>29</sub>H<sub>28</sub>NO<sub>4</sub>S<sub>2</sub><sup>+</sup> 458.1454; Found: 458.1471 [M+H]<sup>+</sup>.

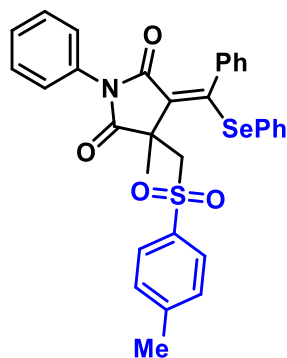

(5a)

**(E)-3-methyl-1-phenyl-4-(phenyl(phenylselanyl)methylene)-3-(tosylmethyl)pyrrolidine-2,5-dione (5a):** Purification by silica gel chromatography (PE:EA=88:12) afforded the desired **5a** as white solid in 80% yield (166 mg), mp 238-240 °C; <sup>1</sup>H-NMR (400 MHz, CDCl<sub>3</sub>) δ 7.90 (d, *J* = 8.0 Hz, 2H), 7.43-7.33 (m, 10H), 7.17 (t, *J* = 7.2 Hz, 2H), 7.08 (t, *J* = 7.4 Hz, 5H), 4.92 (d, *J* = 14.0 Hz, 1H), 3.91 (d, *J* = 14.2 Hz, 1H), 2.46 (s, 3H), 1.84 (s, 3H); <sup>13</sup>C-NMR (100 MHz, CDCl<sub>3</sub>) δ 177.6, 164.7, 157.5, 145.2, 137.9, 137.5, 136.6, 132.3, 130.2, 129.0, 128.9, 128.5, 128.2, 127.9, 127.4, 127.1, 126.8, 125.7, 57.7, 47.1, 24.8, 21.8; MS (ESI) *m/z* 602 [M+H]<sup>+</sup>; HRMS Calculated for C<sub>32</sub>H<sub>28</sub>NO<sub>4</sub>SSe<sup>+</sup> 602.0899; Found: 602.0893 [M+H]<sup>+</sup>.

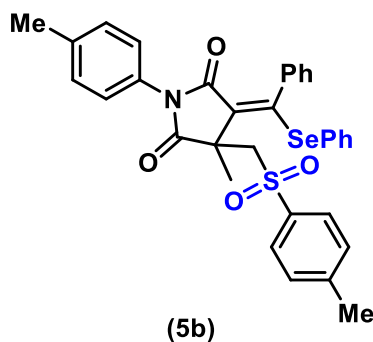

(5b)

**(E)-3-methyl-4-(phenyl(phenylselanyl)methylene)-1-(p-tolyl)-3-(tosylmethyl)pyrrolidine-2,5-dione (5b):** Purification by silica gel chromatography (PE:EA=88:12) afforded the desired **5b** as brown solid in 83% yield (177 mg), mp 238-240 °C; <sup>1</sup>H-NMR (400 MHz, CDCl<sub>3</sub>) δ 7.86 (d, *J* = 8.1 Hz, 2H), 7.40-7.35 (m, 4H), 7.24 (d, *J* = 3.8 Hz, 2H), 7.20-7.13 (m, 5H), 7.08-6.99 (m, 5H), 4.88 (d, *J* = 14.2 Hz, 1H), 3.88 (d, *J* = 14.0 Hz, 1H), 2.45 (s, 3H),



2.32 (s, 3H), 1.80 (s, 3H);  $^{13}\text{C-NMR}$  (100 MHz,  $\text{CDCl}_3$ )  $\delta$  177.7, 164.8, 157.2, 145.1, 138.5, 137.9, 137.5, 136.5, 130.1, 129.9, 129.6, 129.3, 128.8, 128.2, 128.1, 127.9, 127.4, 126.8, 125.8, 57.6, 47.1, 24.8, 21.8, 21.3 **MS** (ESI)  $m/z$  616  $[\text{M}+\text{H}]^+$ ; HRMS Calculated for  $\text{C}_{33}\text{H}_{30}\text{NO}_4\text{SSe}^+$  616.1055; Found: 616.1060  $[\text{M}+\text{H}]^+$ .

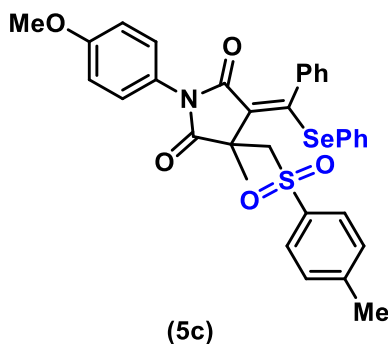

**(E)-1-(4-methoxyphenyl)-3-methyl-4-(phenyl(phenylselanyl)methylene)-3-**

**(tosylmethyl)pyrrolidine-2,5-dione (5c):** Purification by silica gel chromatography (PE:EA=88:12) afforded the desired **5c** as pale yellow solid in 88% yield (192 mg), mp 236-238 °C;  $^1\text{H-NMR}$  (400 MHz,  $\text{CDCl}_3$ )  $\delta$  7.86 (d,  $J = 8.4$  Hz, 2H), 7.37 (t,  $J = 8.2$  Hz, 5H), 7.29 (dd,  $J = 6.9, 2.2$  Hz, 2H), 7.17-7.12 (m, 2H), 7.07-6.99 (m, 5H), 6.91 (dd,  $J = 6.9, 2.2$  Hz, 2H), 4.88 (d,  $J = 14.0$  Hz, 1H), 3.87 (d,  $J = 14.6$  Hz, 1H), 3.77 (s, 3H), 2.45 (s, 3H), 1.80 (s, 3H);  $^{13}\text{C-NMR}$  (100 MHz,  $\text{CDCl}_3$ )  $\delta$  177.8, 164.9, 159.5, 157.0, 145.0, 137.9, 137.8, 137.5, 136.5, 130.1, 128.8, 128.5, 128.2, 127.9, 127.4, 126.8, 125.8, 125.0, 114.3, 57.7, 55.6, 47.0, 24.7, 21.8. **MS** (ESI)  $m/z$  632  $[\text{M}+\text{H}]^+$ ; HRMS Calculated for  $\text{C}_{33}\text{H}_{30}\text{NO}_5\text{SSe}^+$  632.1004; Found: 632.1019  $[\text{M}+\text{H}]^+$ .

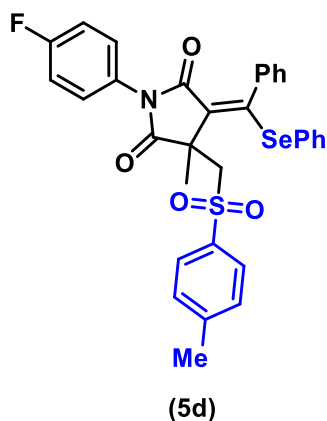

**(E)-1-(4-fluorophenyl)-3-methyl-4-(phenyl(phenylselanyl)methylene)-3-**

**(tosylmethyl)pyrrolidine-2,5-dione(5d):** Purification by silica gel chromatography (PE:EA=88:12) afforded the desired **5d** as white solid in 85% yield (182 mg), mp 204-206 °C; <sup>1</sup>H-NMR (400 MHz, CDCl<sub>3</sub>) δ 7.86 (d, *J* = 8.1 Hz, 2H), 7.39-7.37 (m, 6H), 7.17-7.04 (m, 10H), 4.89 (d, *J* = 14.0 Hz, 1H), 3.86 (d, *J* = 14.0 Hz, 1H), 2.46 (s, 3H), 1.81 (s, 3H); <sup>13</sup>C-NMR (100 MHz, CDCl<sub>3</sub>) δ 177.6, 164.6, 162.3 (d, *J* = 246.3Hz), 158.0, 145.2, 137.7, 137.4, 136.6, 130.2, 129.0, 128.9, 128.7, 128.2, 128.1, 127.9, 127.4, 126.6, 125.4, 115.9 (d, *J* = 23.0 Hz), 57.6, 47.0, 24.7, 21.8; 19F NMR (376 MHz, CDCl<sub>3</sub>) δ -112.9 (s, 1F); MS (ESI) *m/z* 620 [M+H]<sup>+</sup>; HRMS Calculated for C<sub>32</sub>H<sub>28</sub>NO<sub>4</sub>S<sup>+</sup> 620.0805; Found: 620.0824 [M+H]<sup>+</sup>.

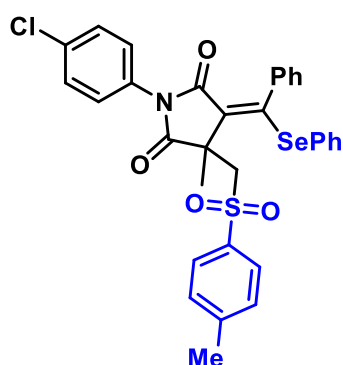

(5e)

**(E)-1-(4-chlorophenyl)-3-methyl-4-(phenyl(phenylselanyl)methylene)-3-**

**(tosylmethyl)pyrrolidine-2,5-dione (5e):** Purification by silica gel chromatography (PE:EA=88:12) afforded the desired **3l** as pale yellow solid in 84% yield (185 mg), mp 201-203 °C; <sup>1</sup>H-NMR (400 MHz, CDCl<sub>3</sub>) δ 7.87 (d, *J* = 8.3 Hz, 2H), 7.40-7.35 (m, 9H), 7.17 (t, *J* = 7.4 Hz, 2H), 7.07 (t, *J* = 7.4 Hz, 5H), 4.91 (d, *J* = 14.0 Hz, 1H), 3.87 (d, *J* = 13.9 Hz, 1H), 2.47 (s, 3H), 1.82 (s, 3H); <sup>13</sup>C-NMR (100 MHz, CDCl<sub>3</sub>) δ 177.3, 164.3, 158.1, 145.1, 137.7, 137.3, 136.5, 134.2, 130.7, 130.1, 129.0, 128.8, 128.3, 128.2, 127.8, 127.4, 126.6, 125.2, 121.8, 57.5, 47.0, 24.6, 21.7 MS (ESI) *m/z* 636 [M+H]<sup>+</sup>; HRMS Calculated for C<sub>32</sub>H<sub>28</sub>NO<sub>4</sub>S<sup>+</sup> 636.0509; Found: 636.0513 [M+H]<sup>+</sup>.

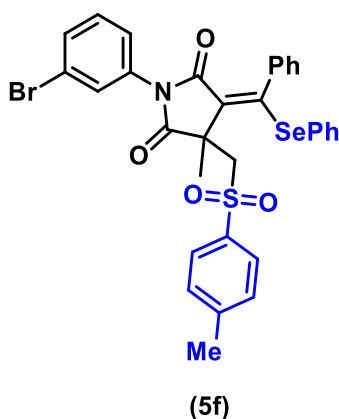

**(E)-1-(3-bromophenyl)-3-methyl-4-(phenyl(phenylselanyl)methylene)-3-**

**(tosylmethyl)pyrrolidine-2,5-dione (5f):** Purification by silica gel chromatography (PE:EA=88:12) afforded the desired **5f** as white solid in 85% yield (199 mg), mp 232-235 °C; <sup>1</sup>H-NMR (400 MHz, CDCl<sub>3</sub>) δ 7.87 (d, *J* = 8.1 Hz, 2H), 7.55 (s, 1H), 7.47 (d, *J* = 8.0 Hz, 1H), 7.40-7.37 (m, 6H), 7.29 (d, *J* = 8.1 Hz, 1H), 7.12 (*dt*, *J* = 36.7, 7.4 Hz, 7H), 4.90 (d, *J* = 14.0 Hz, 1H), 3.87 (*d*, *J* = 14.0 Hz, 1H), 2.47 (s, 3H), 1.82 (s, 3H); <sup>13</sup>C-NMR (100 MHz, CDCl<sub>3</sub>) δ 177.3, 164.2, 158.5, 145.2, 137.8, 137.7, 137.4, 136.6, 133.4, 131.6, 130.2, 130.0, 128.9, 128.3, 128.2, 127.9, 127.5, 126.6, 125.8, 125.1, 122.2, 57.5, 47.1, 24.7, 21.8 **MS** (ESI) *m/z* 680 [M+H]<sup>+</sup>; HRMS Calculated for C<sub>32</sub>H<sub>27</sub>NO<sub>4</sub>BrSSe<sup>+</sup> 680.0004; Found: 680.0020 [M+H]<sup>+</sup>.

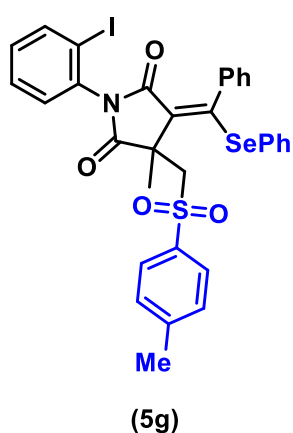

**(E)-1-(2-iodophenyl)-3-methyl-4-(phenyl(phenylselanyl)methylene)-3-**

**(tosylmethyl)pyrrolidine-2,5-dione (5g):** Purification by silica gel chromatography (PE:EA=88:12) afforded the desired **5g** as white solid in 80% yield (201 mg), mp 232-234 °C;

**<sup>1</sup>H-NMR** (400 MHz, CDCl<sub>3</sub>)  $\delta$  7.87-7.83 (m, 3H), 7.49 (dd,  $J$  = 7.9, 1.6 Hz, 1H), 7.44-7.36 (m, 5H), 7.19-6.99 (m, 9H), 4.86 (d,  $J$  = 14.0 Hz, 1H), 3.91 (d,  $J$  = 14.0 Hz, 1H), 2.46 (s, 3H), 1.92 (s, 3H) **<sup>13</sup>C-NMR** (100 MHz, CDCl<sub>3</sub>)  $\delta$  176.6, 163.8, 157.6, 145.1, 139.2, 138.0, 137.3, 136.5, 135.6, 130.8, 130.1, 129.9, 129.6, 128.9, 128.2, 127.9, 127.4, 126.7, 125.9, 97.9, 58.2, 47.6, 24.1, 21.8; **MS** (ESI)  $m/z$  727 [M+H]<sup>+</sup>; **HRMS** Calculated for C<sub>32</sub>H<sub>27</sub>NO<sub>4</sub>ISse<sup>+</sup> 727.9865; Found: 727.9844 [M+H]<sup>+</sup>.

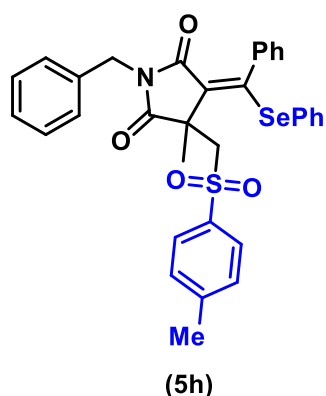

**(E)-1-benzyl-3-methyl-4-(phenyl(phenylselanyl)methylene)-3-(tosylmethyl)pyrrolidine-2,5-dione (5i):** Purification by silica gel chromatography (PE:EA=88:12) afforded the desired **3i** as white solid in 86% yield (183 mg), mp 165-167 °C; **<sup>1</sup>H-NMR** (400 MHz, CDCl<sub>3</sub>)  $\delta$  7.77 (d,  $J$  = 8.2 Hz, 2H), 7.37-7.32 (m, 6H), 7.28-7.20 (m, 4H), 7.17-7.11 (m, 2H), 7.10-7.02 (m, 5H), 4.83 (d,  $J$  = 14.2 Hz, 1H), 4.63 (dd,  $J$  = 15.9, 14.5 Hz, 2H), 3.81 (d,  $J$  = 14.3 Hz, 1H), 2.45 (s, 3H), 1.64 (s, 3H); **<sup>13</sup>C-NMR** (100 MHz, CDCl<sub>3</sub>)  $\delta$  177.8, 165.1, 156.0, 145.0, 137.8, 137.5, 136.5, 136.0, 130.0, 129.1, 128.8, 128.7, 128.5, 128.2, 128.0, 127.7, 127.4, 126.8, 126.0, 57.3, 47.1, 42.7, 24.8, 21.8. **MS** (ESI)  $m/z$  616 [M+H]<sup>+</sup>; **HRMS** Calculated for C<sub>33</sub>H<sub>30</sub>NO<sub>4</sub>Sse<sup>+</sup> 616.1055; Found: 616.1063 [M+H]<sup>+</sup>.

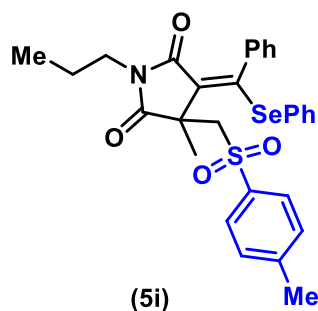

**(E)-3-methyl-4-(phenyl(phenylselanyl)methylene)-1-propyl-3-(tosylmethyl)pyrrolidine-2,5-dione (5i):** Purification by silica gel chromatography (PE:EA=88:12) afforded the desired **5j** as yellow solid in 80% yield (157 mg), mp 170-172 °C; **<sup>1</sup>H-NMR** (400 MHz, CDCl<sub>3</sub>)  $\delta$  7.74 (d,  $J$  = 8.0 Hz, 2H), 7.29 (d,  $J$  = 7.6 Hz, 4H), 7.09-6.98 (m, 8H), 4.71 (d,  $J$  = 14.4 Hz, 1H), 3.73 (d,  $J$  = 14.0 Hz, 1H), 3.40-3.31 (m, 2H), 2.39 (s, 3H), 1.61 (s, 3H), 1.59-1.53 (m, 2H), 0.80 (t,  $J$  = 7.2 Hz, 3H); **<sup>13</sup>C-NMR** (100 MHz, CDCl<sub>3</sub>)  $\delta$  178.1, 165.5, 155.3, 145.0, 137.8, 137.6, 136.5, 130.1, 128.8, 128.7, 128.1, 127.9, 127.3, 126.7, 126.3, 57.4, 46.9, 40.8, 24.8, 21.8, 20.8, 11.4; **MS** (ESI)  $m/z$  568 [M+H]<sup>+</sup>; HRMS Calculated for C<sub>29</sub>H<sub>30</sub>NO<sub>4</sub>SSe<sup>+</sup> 568.1055; Found: 568.1071 [M+H]<sup>+</sup>.

**(8) Copies of  $^1\text{H}$  NMR,  $^{13}\text{C}$  NMR,  $^{19}\text{F}$  NMR and Mass Spectra**

<sup>1</sup>H NMR spectrum of 1g (400 MHz, CDCl<sub>3</sub>)

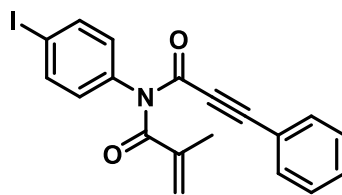

1g

*N*-(4-iodophenyl)-*N*-(3-phenylpropioyl)methacrylamide (1g)

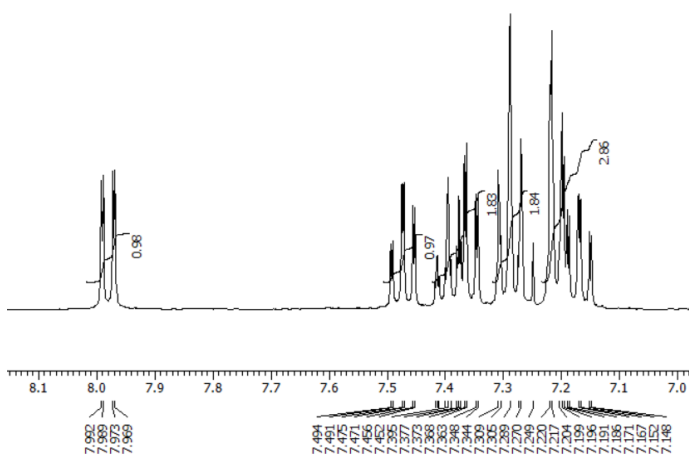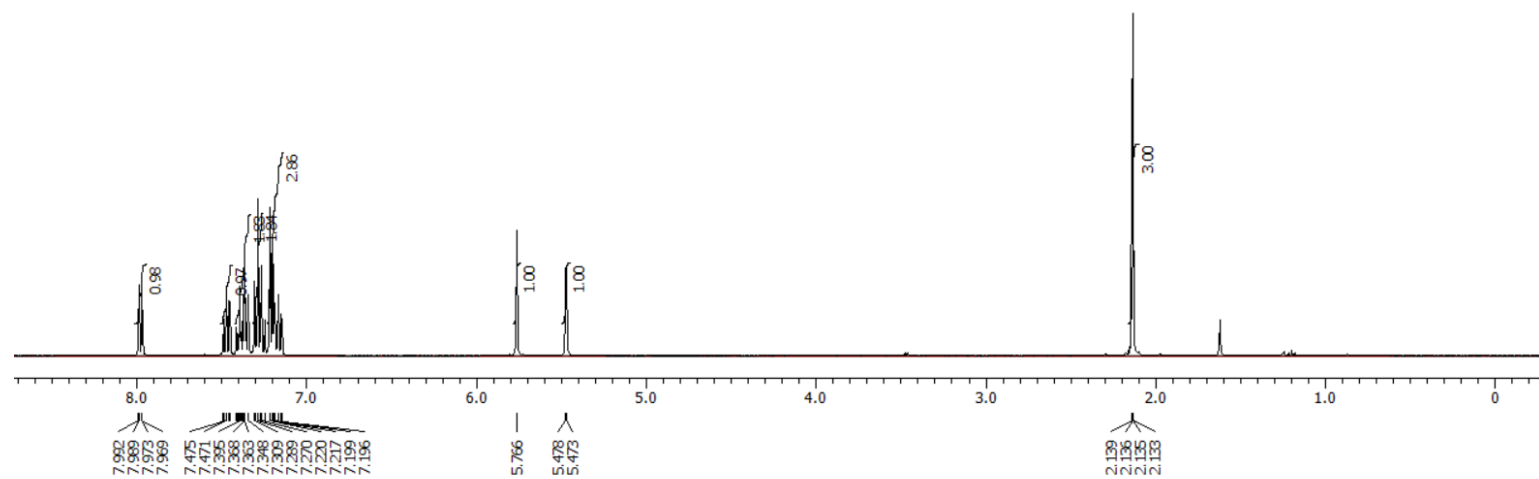

<sup>13</sup>C NMR spectrum of 1g (100 MHz, CDCl<sub>3</sub>)

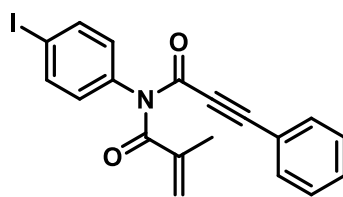

1g

*N*-(4-iodophenyl)-*N*-(3-phenylpropioloyl)methacrylamide (1g)

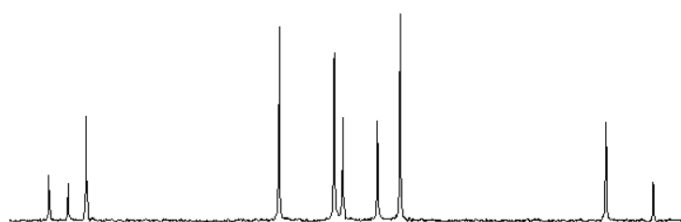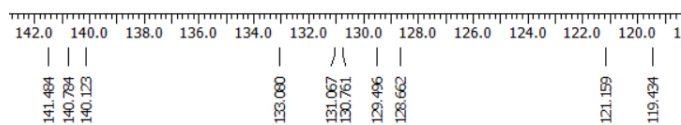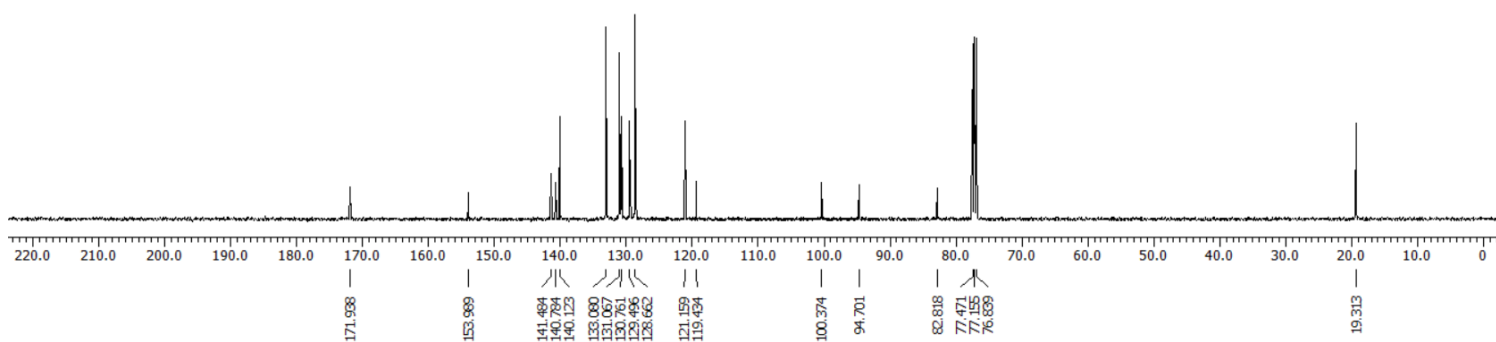



## Mass spectrum of 1g

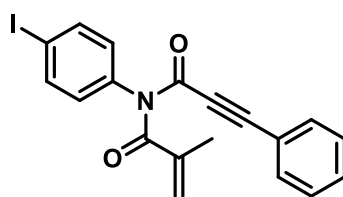

1g

### *N*-(4-iodophenyl)-*N*-(3-phenylpropioloyl)methacrylamide (1g)

#### MFE MS Spectrum

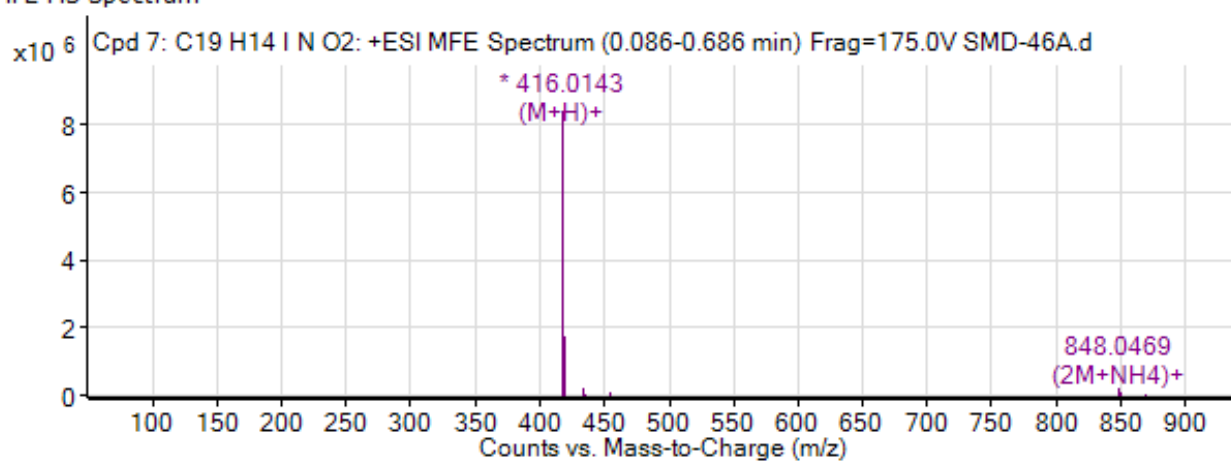

#### MFE MS Zoomed Spectrum

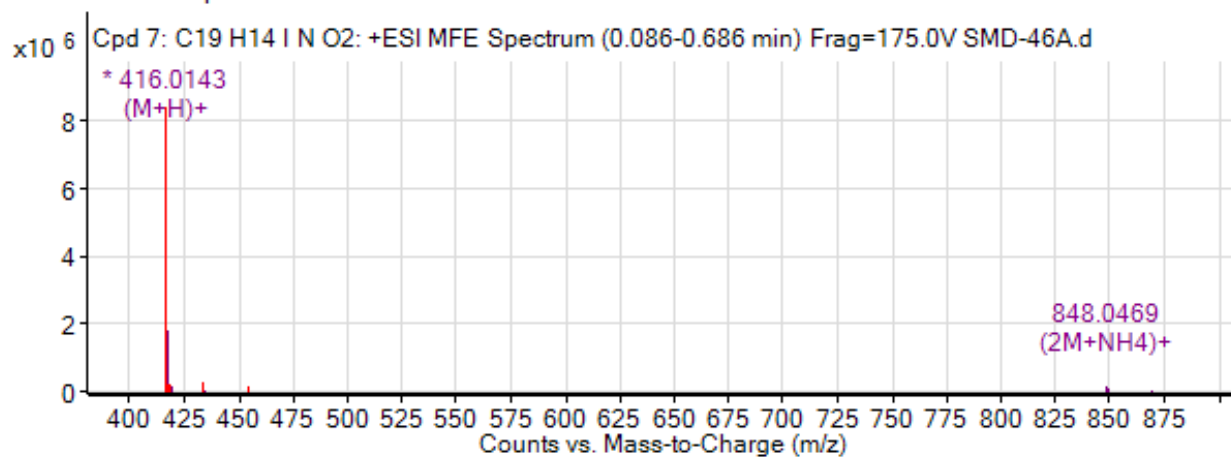

<sup>1</sup>H NMR spectrum of 1h (400 MHz, CDCl<sub>3</sub>)

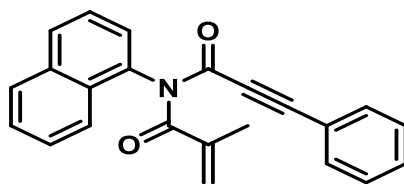

1h

*O*-(naphthalen-1-yl)-*N*-(3-phenylpropioloyl)methacrylamide (1h)

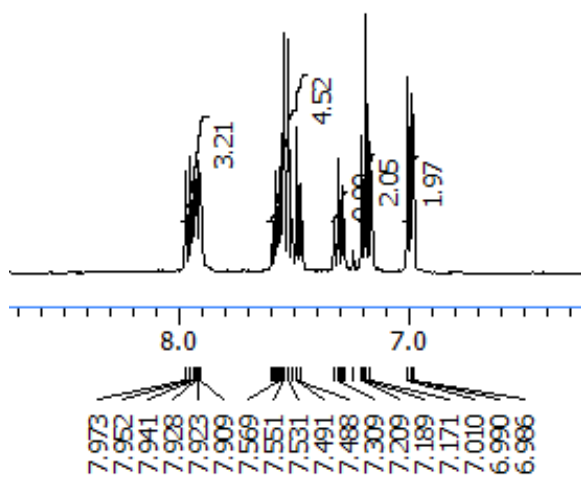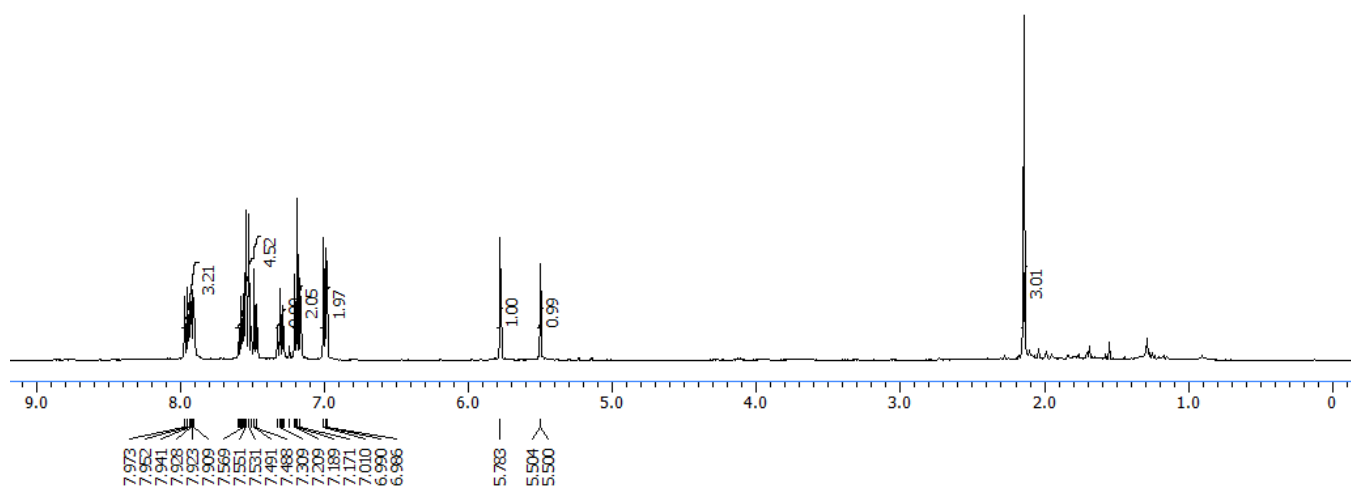

<sup>13</sup>C NMR spectrum of 1h (100 MHz, CDCl<sub>3</sub>)

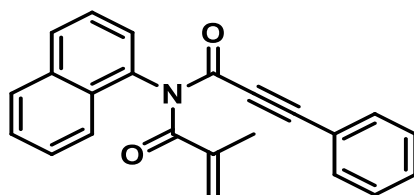

1h

*N*-(naphthalen-1-yl)-*N*-(3-phenylpropioloyl)methacrylamide (1h)

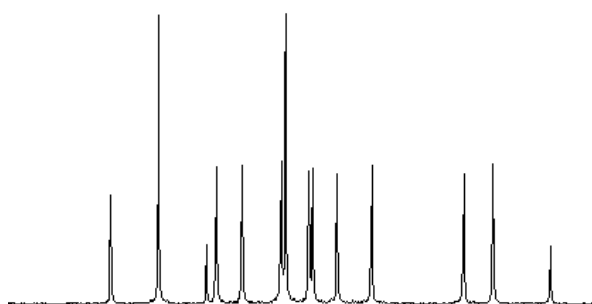

137.0 135.0 133.0 131.0 129.0 127.0 125.0 123.0 121.0 119.0

134.555  
132.917  
131.259  
130.923  
130.023  
128.691  
128.547  
127.732  
127.608  
126.765  
125.567  
122.404  
121.389  
119.405

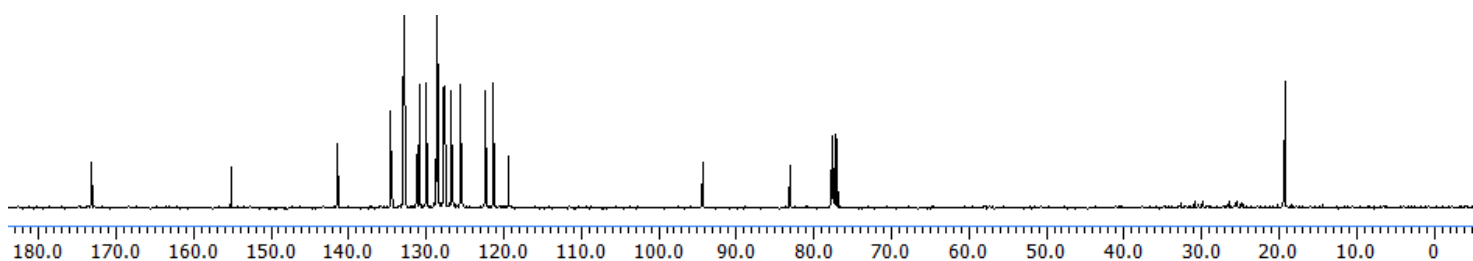

173.183  
155.158  
141.464  
134.555  
132.917  
131.259  
130.923  
130.023  
128.691  
128.547  
127.732  
127.608  
126.765  
125.567  
122.404  
121.389  
119.405

94.279  
88.010  
77.586  
77.270  
76.954  
19.265

### Mass spectrum of 1h

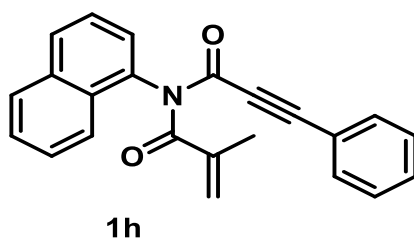

### *N*-(naphthalen-1-yl)-*N*-(3-phenylpropioloyl)methacrylamide (1h)

#### MFE MS Spectrum

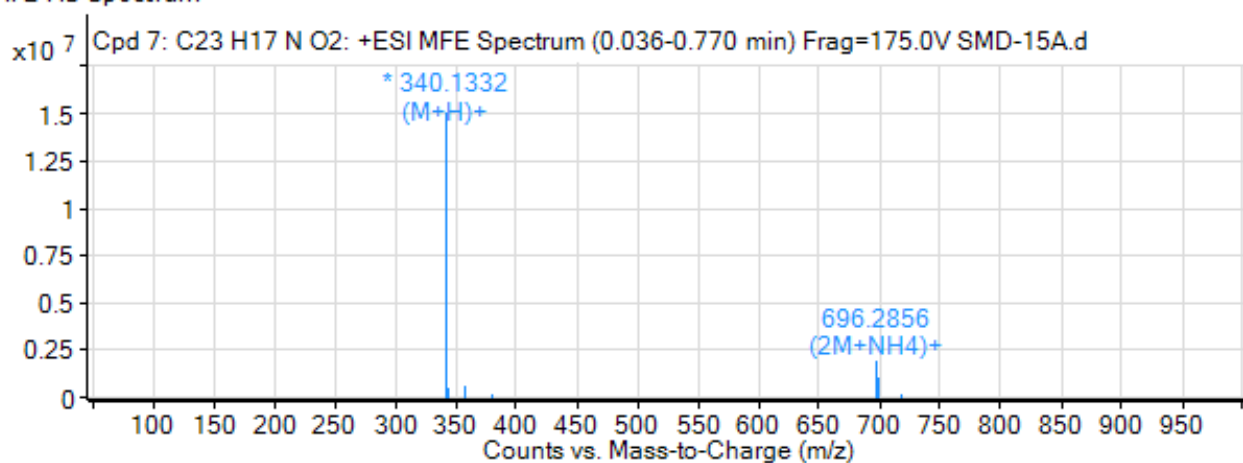

#### MFE MS Zoomed Spectrum

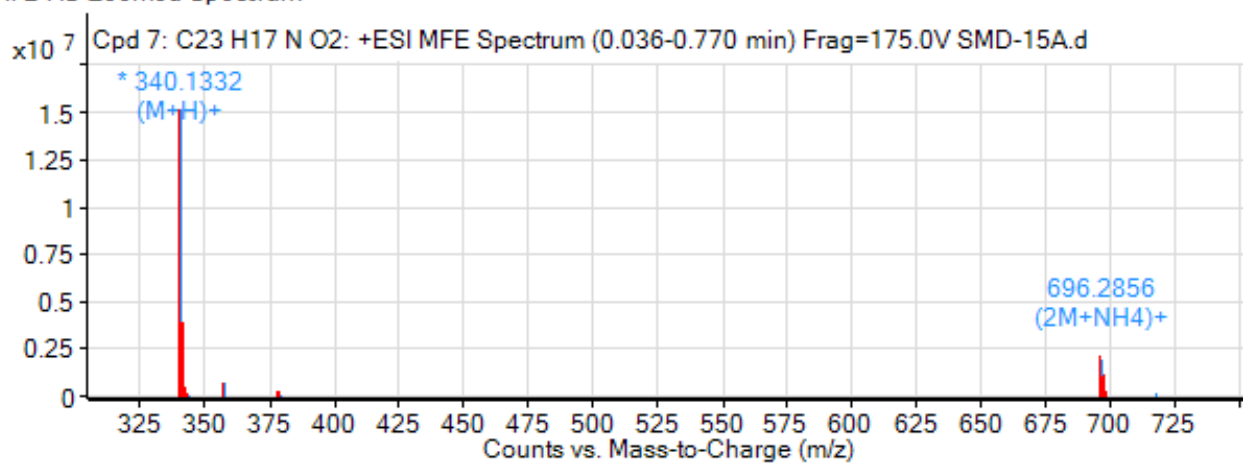

<sup>1</sup>H NMR spectrum of 1j (400 MHz, CDCl<sub>3</sub>)

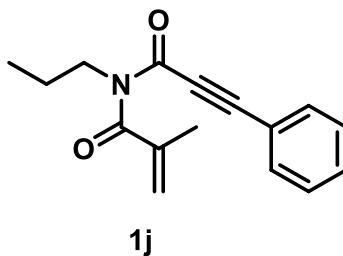

*N*-(3-phenylprop-1-yn-1-yl)-*N*-propylmethacrylamide (1j)

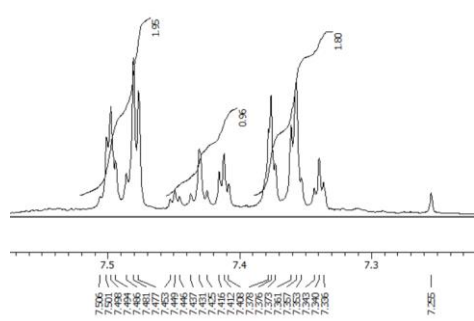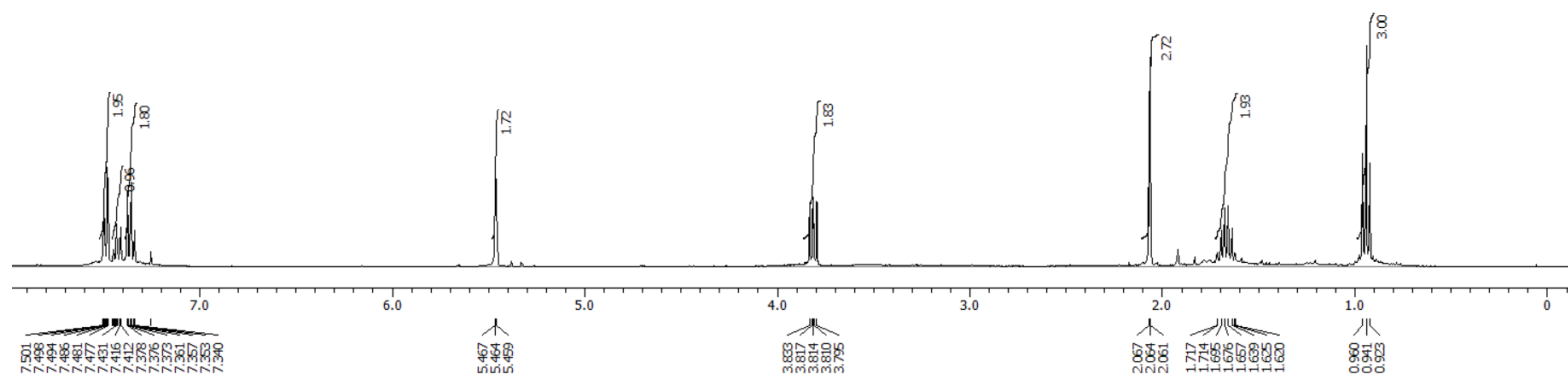

<sup>13</sup>C NMR spectrum of 1j (100 MHz, CDCl<sub>3</sub>)

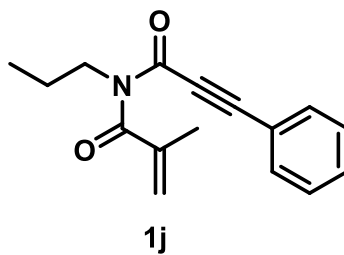

*N*-(3-phenylpropioloyl)-*N*-propylmethacrylamide (1j)

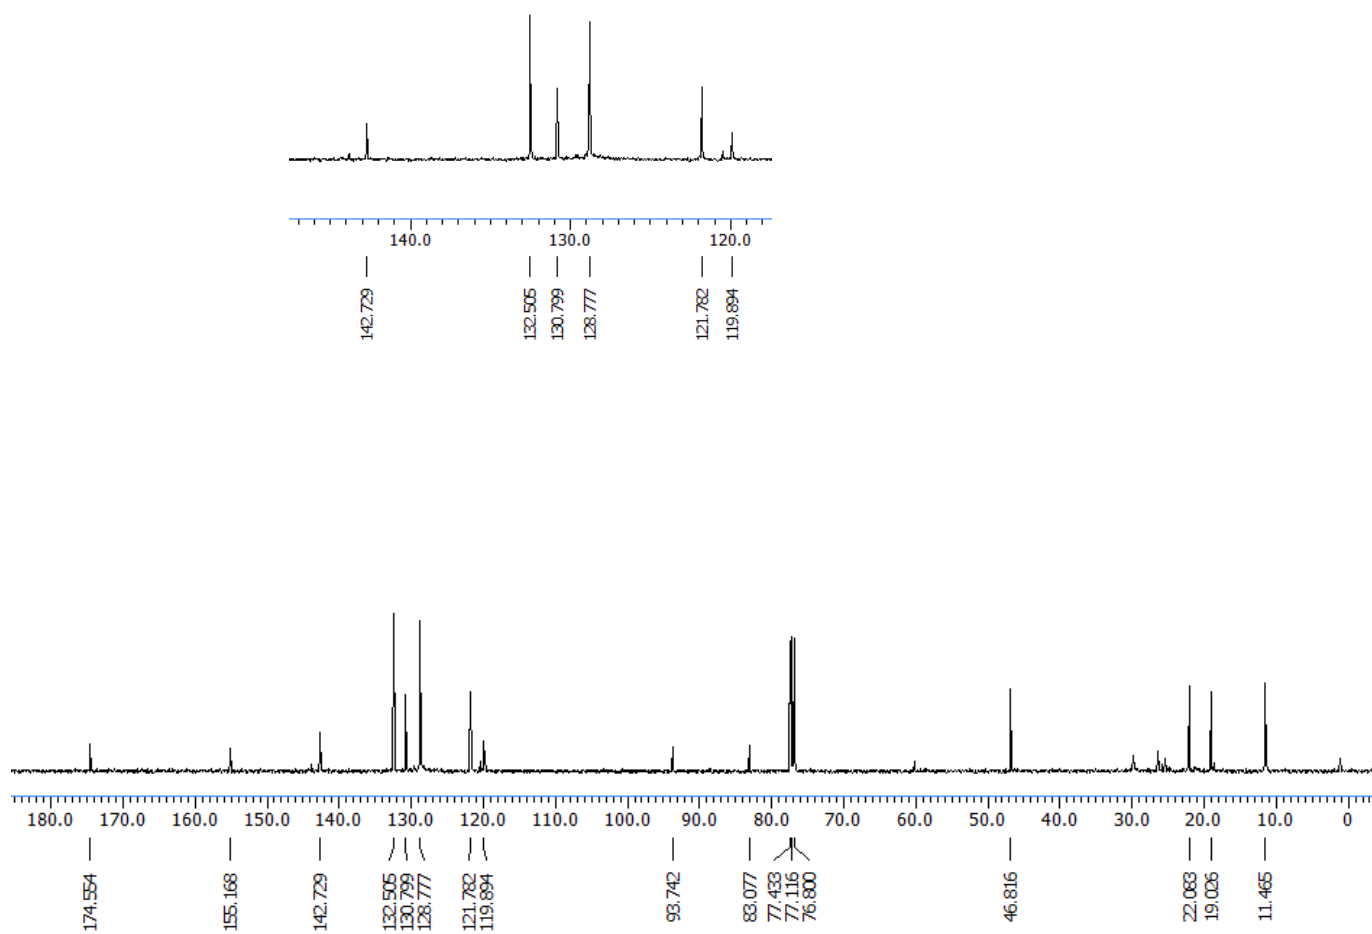

### Mass spectrum of 1j

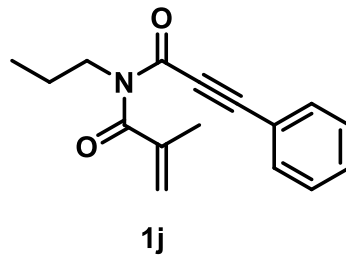

### *N*-(3-phenylpropioloyl)-*N*-propylmethacrylamide (1j)

#### MFE MS Spectrum

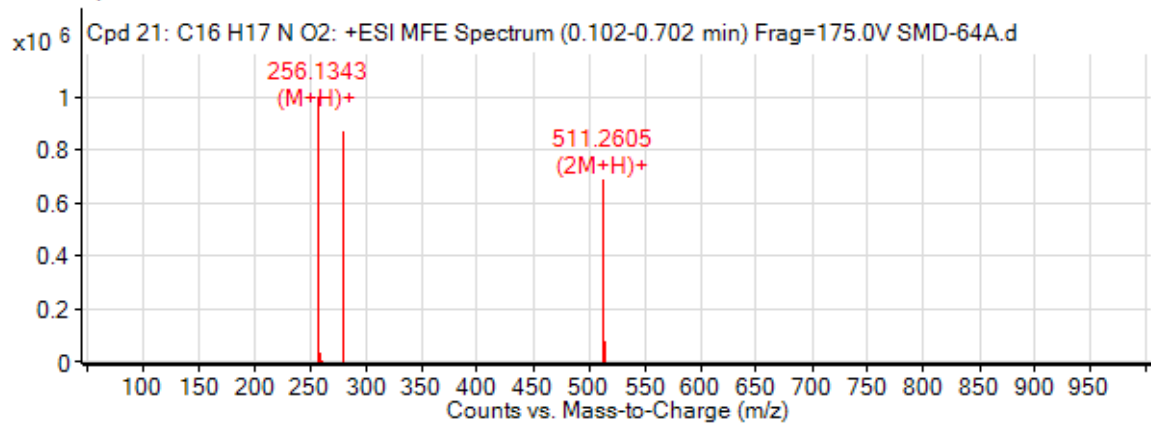

#### MFE MS Zoomed Spectrum

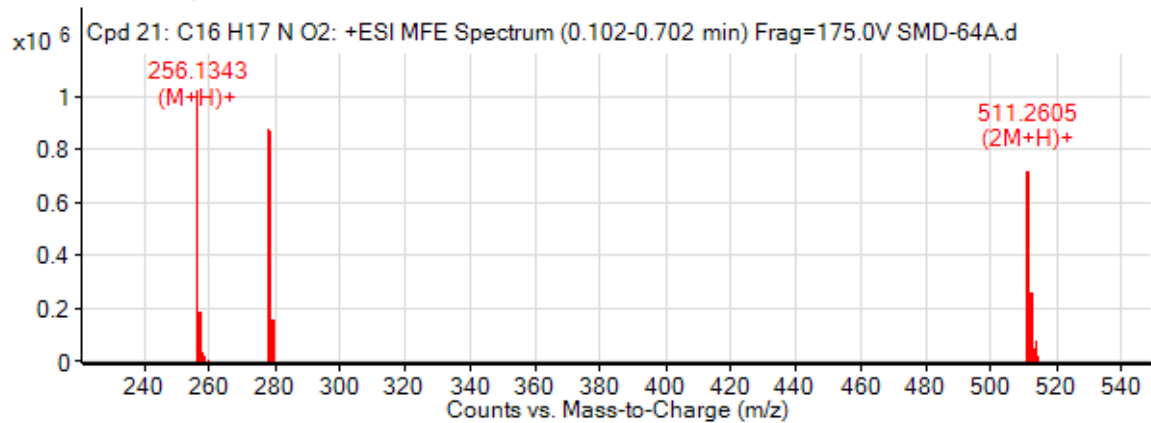

<sup>1</sup>H NMR spectrum of 1k (400 MHz, CDCl<sub>3</sub>)

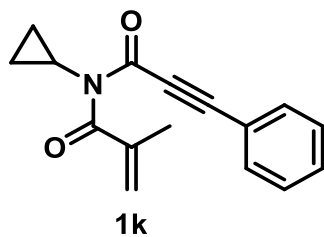

*N*-cyclopropyl-*N*-(3-phenylpropioloyl)methacrylamide (1k)

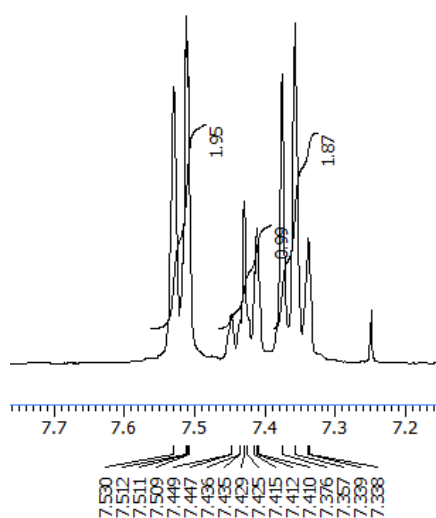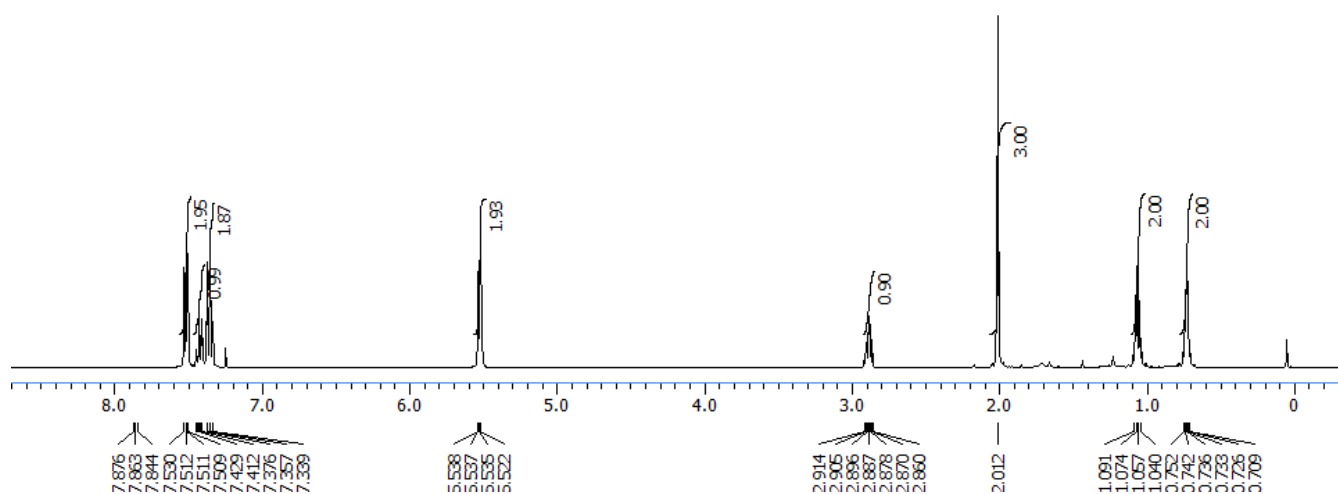



<sup>13</sup>C NMR spectrum of 1k (100 MHz, CDCl<sub>3</sub>)

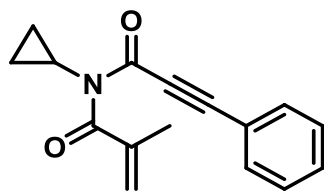

1k

*N*-cyclopropyl-*N*-(3-phenylpropioloyl)methacrylamide (1k)

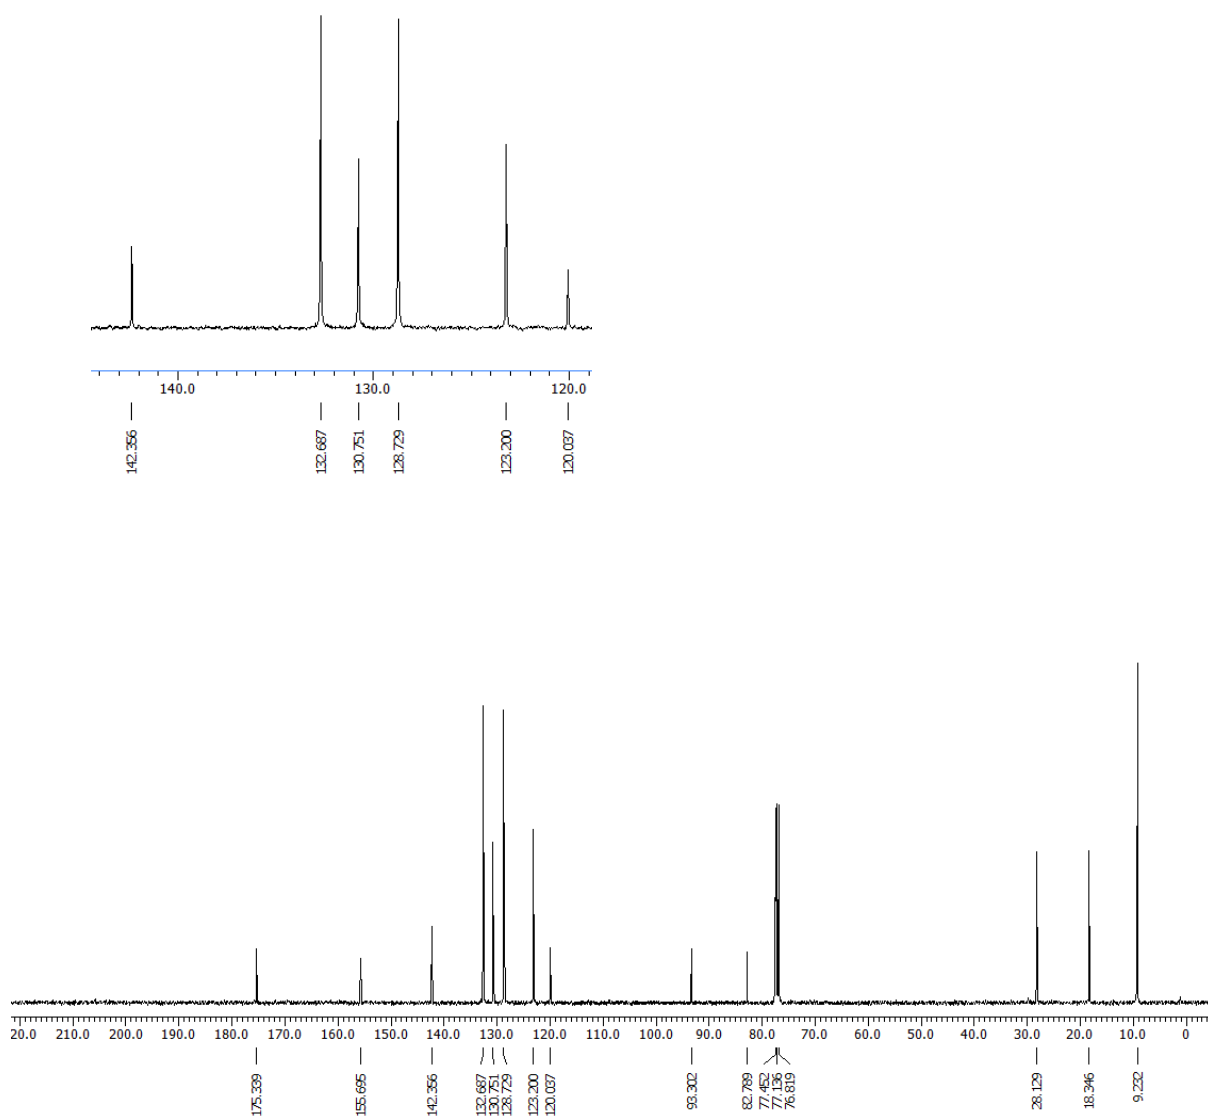

### Mass Spectrum of 1k

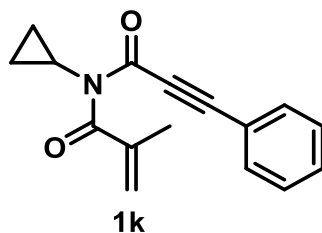

*N*-cyclopropyl-*N*-(3-phenylpropioloyl)methacrylamide (1k)

#### MFE MS Spectrum

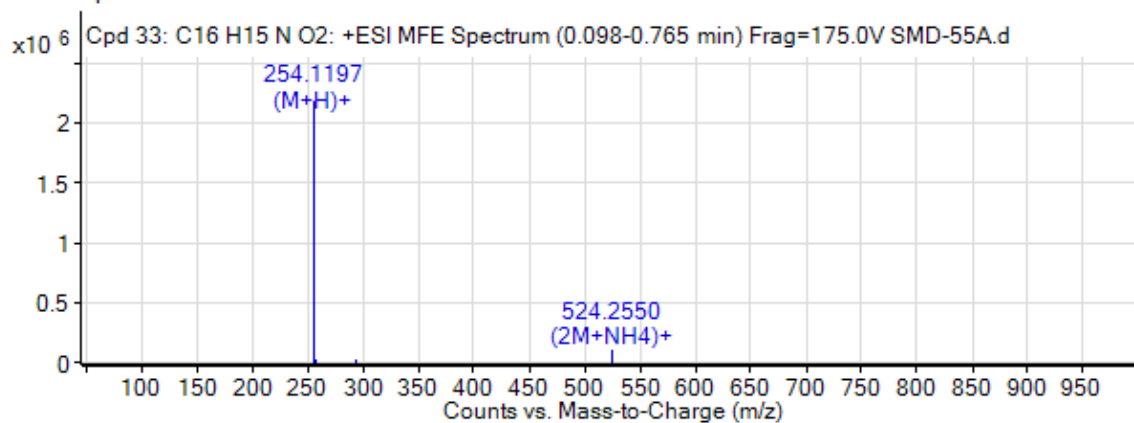

#### MFE MS Zoomed Spectrum

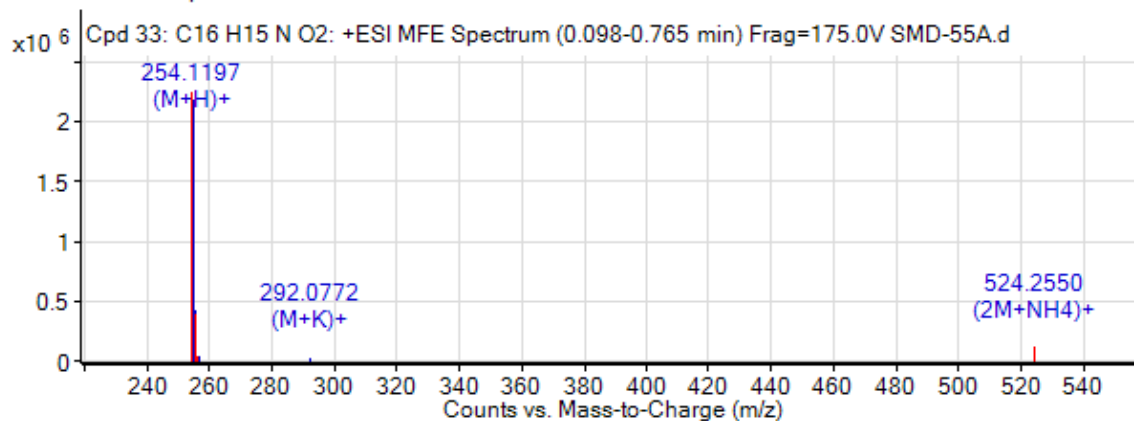

<sup>1</sup>H NMR spectrum of 2h (400 MHz, CDCl<sub>3</sub>)

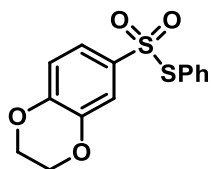

2h

*S*-phenyl 2,3-dihydrobenzo[*b*][1,4]dioxine-6-sulfonothioate (2h)

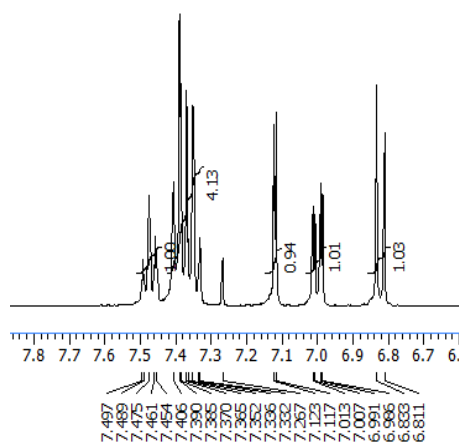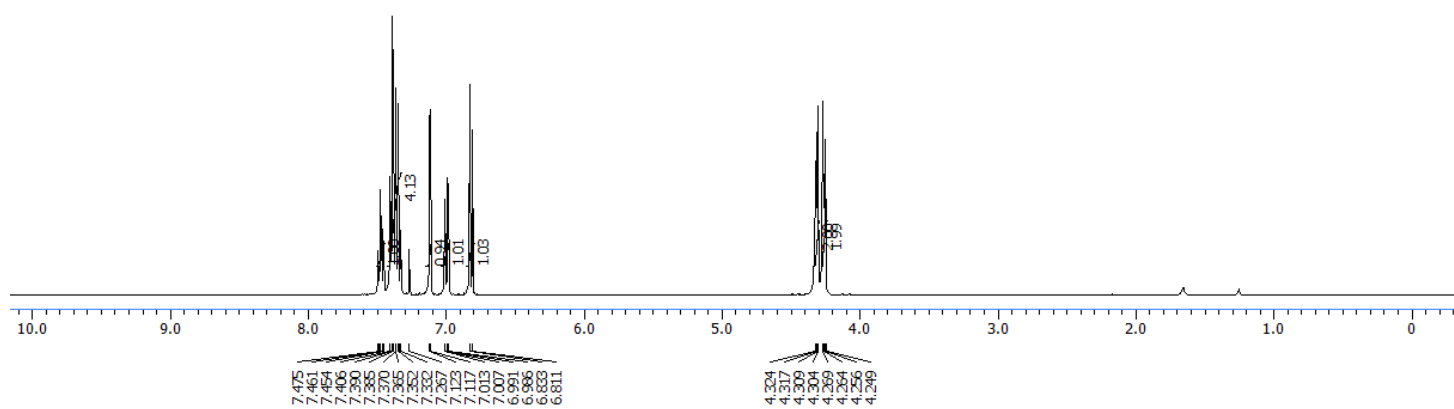

<sup>13</sup>C NMR spectrum of 2h (100 MHz, CDCl<sub>3</sub>)

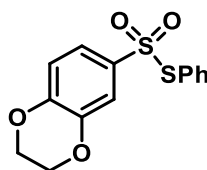

2h

*S*-phenyl 2,3-dihydrobenzo[*b*][1,4]dioxine-6-sulfonothioate (2h)

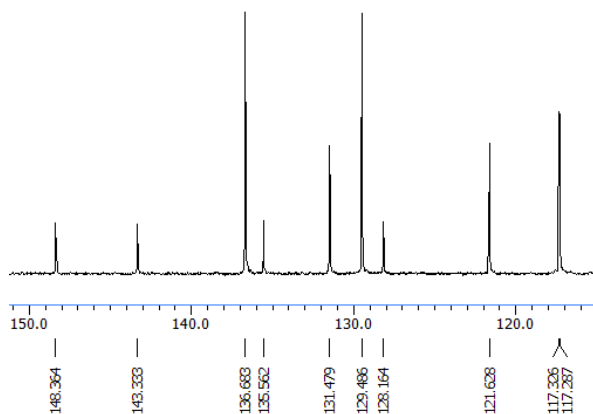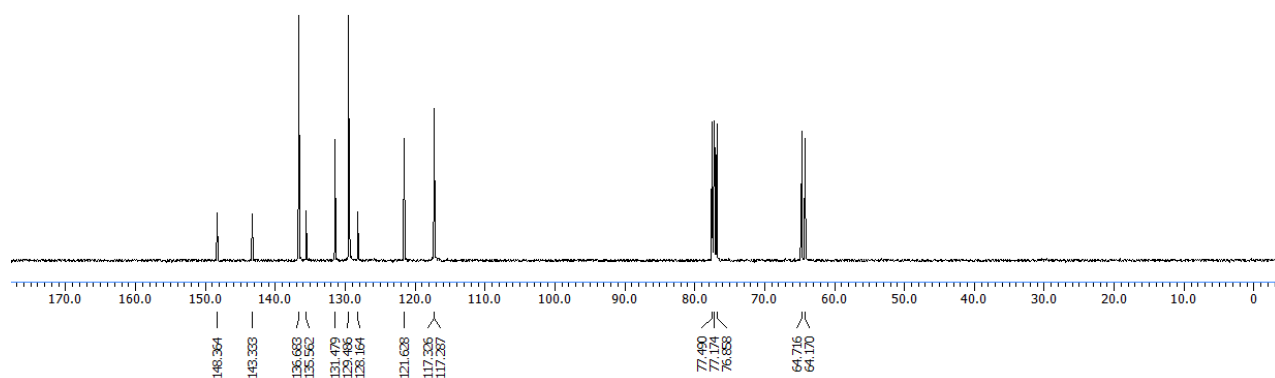

## Mass spectrum of 2h

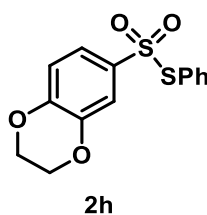

**S-phenyl 2,3-dihydrobenzo[b][1,4]dioxine-6-sulfonothioate (2h)**

MFE MS Spectrum

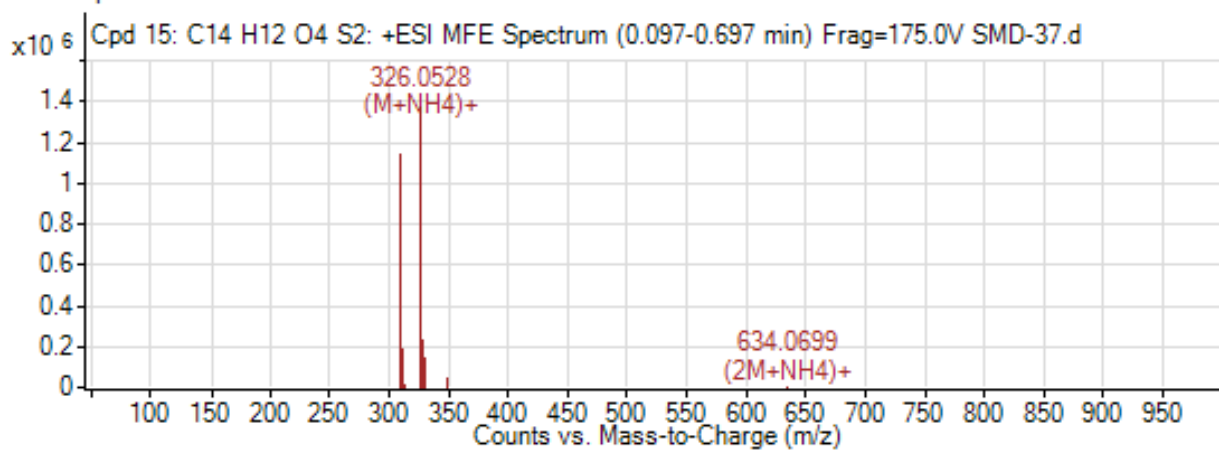

MFE MS Zoomed Spectrum

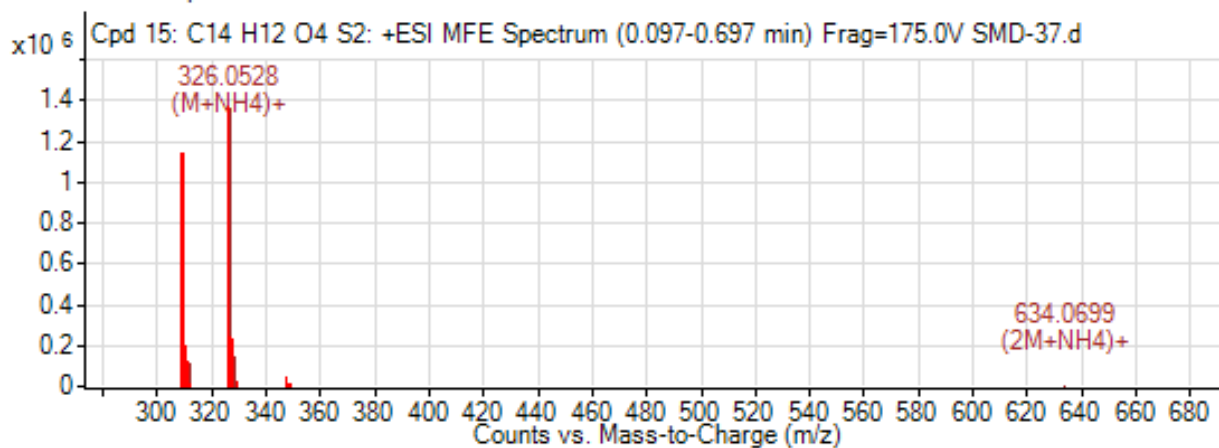

<sup>1</sup>H NMR spectrum of 2n (400 MHz, CDCl<sub>3</sub>)

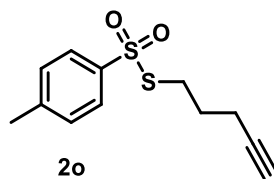

S-(pent-4-yn-1-yl) 4-methylbenzenesulfonothioate (2o)

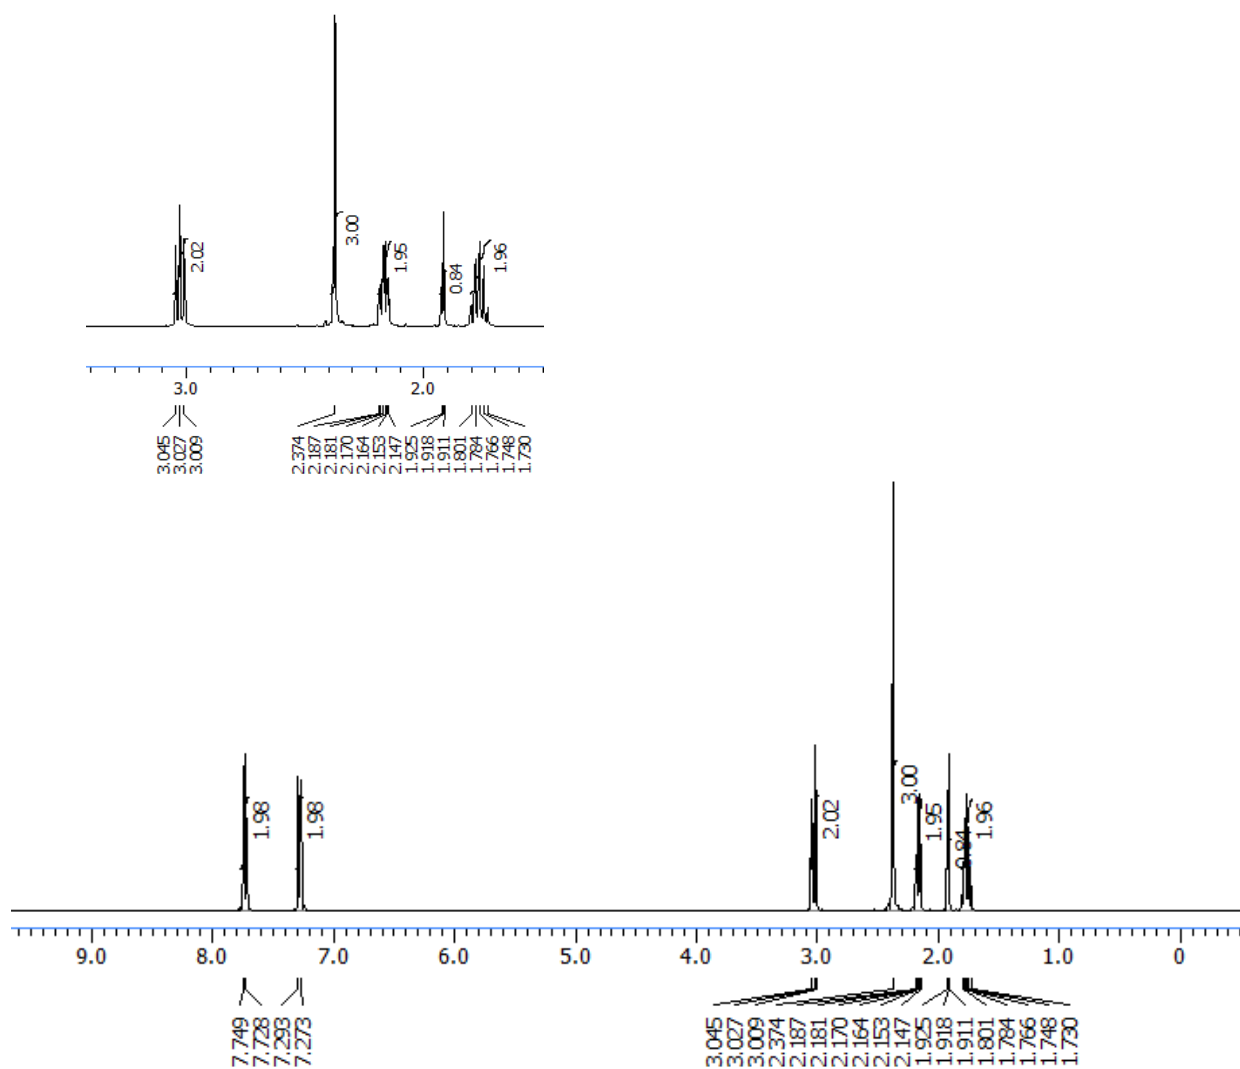

<sup>13</sup>C NMR spectrum of 2n (100 MHz, CDCl<sub>3</sub>)

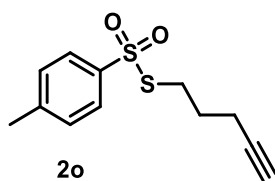

*S*-(pent-4-yn-1-yl) 4-methylbenzenesulfonothioate (2o)

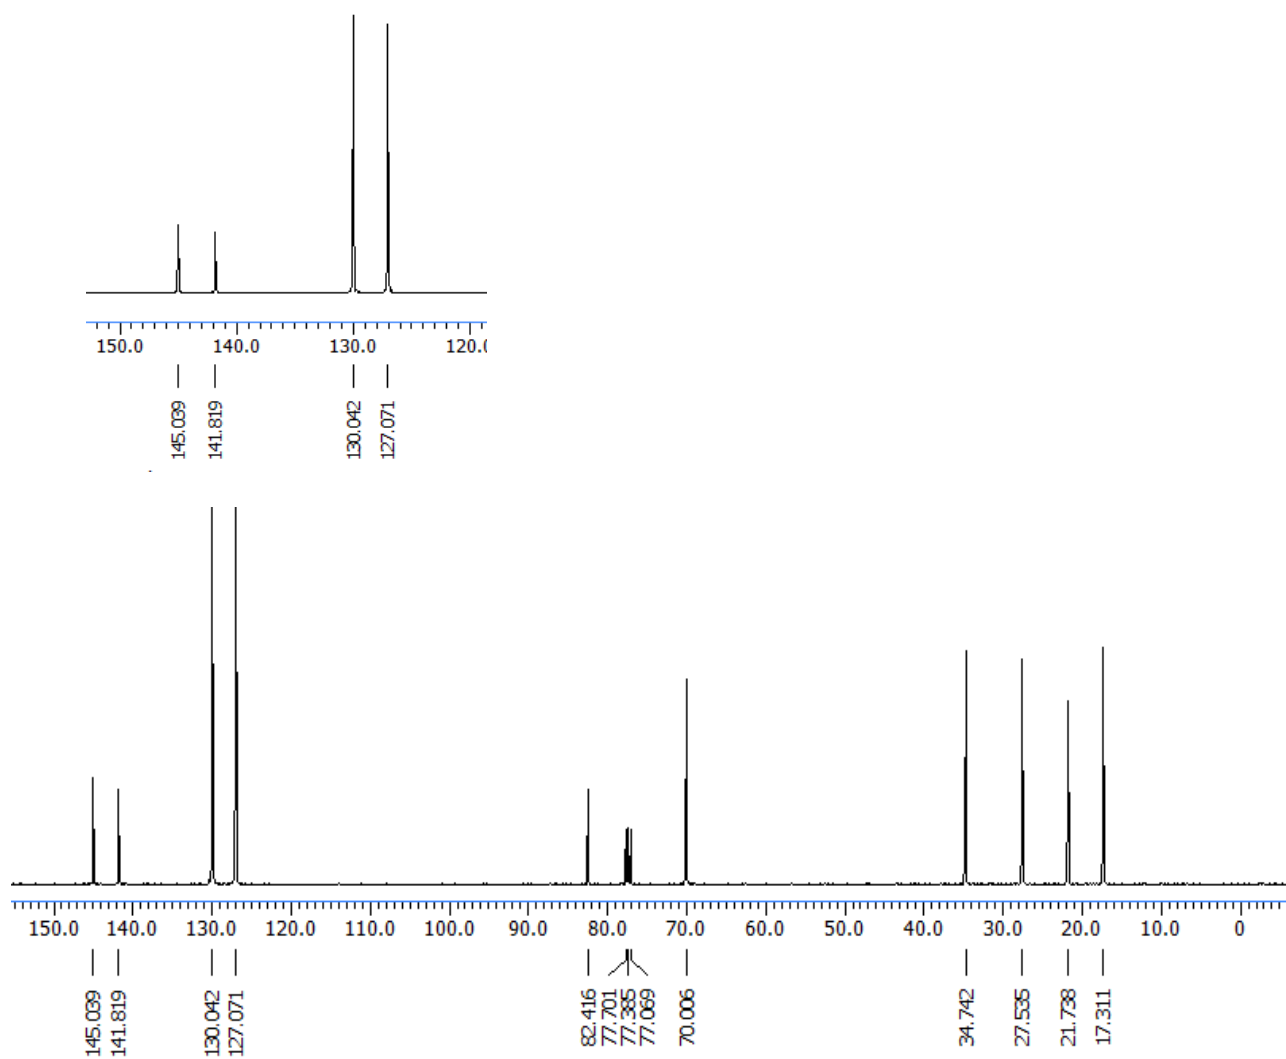

## Mass spectrum of 2n

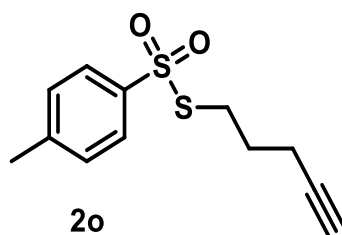

*S*-(pent-4-yn-1-yl) 4-methylbenzenesulfonothioate (2o)

### MS Spectrum

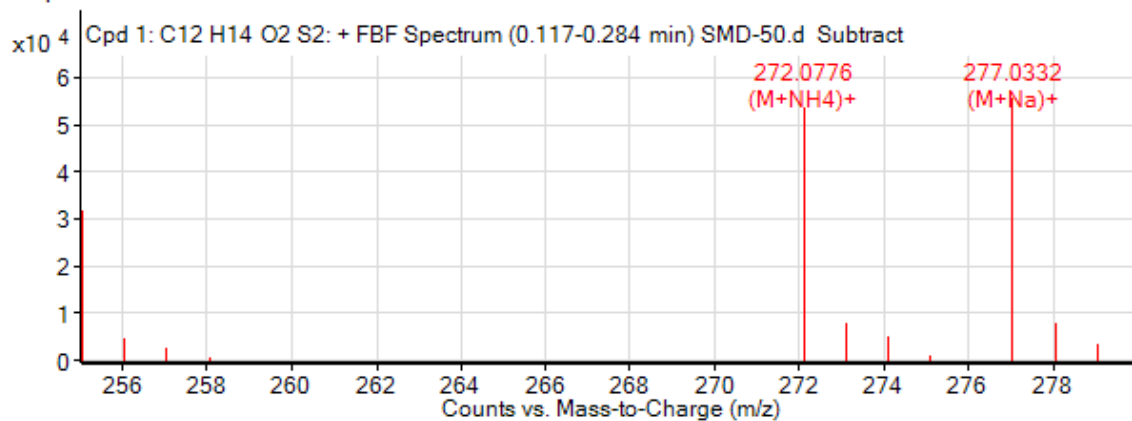

### MS Zoomed Spectrum

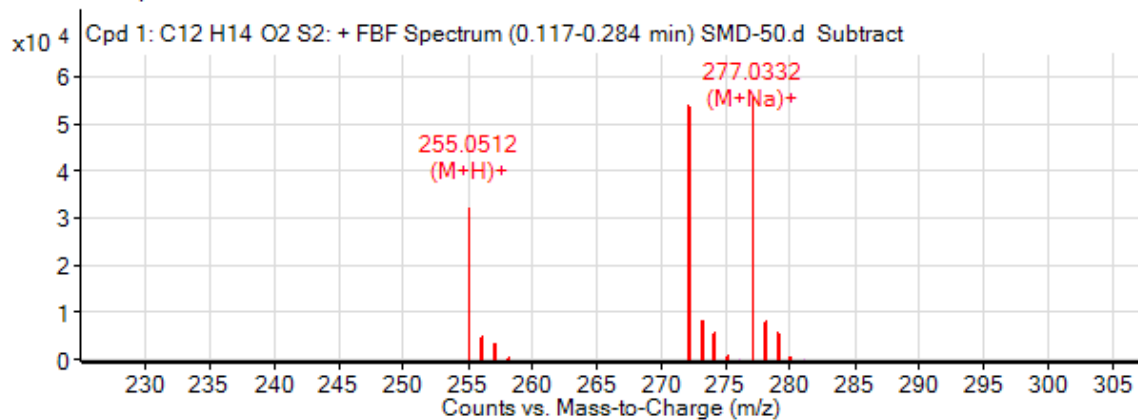



**<sup>1</sup>H NMR spectrum of 3aa (400 MHz, CDCl<sub>3</sub>)**

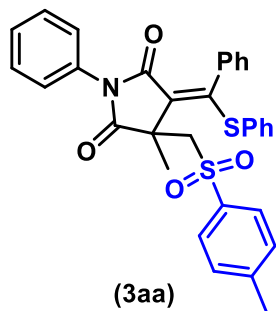

**(E)-3-methyl-1-phenyl-4-(phenyl(phenylthio)methylene)-3-(tosylmethyl)pyrrolidine-2,5-dione**

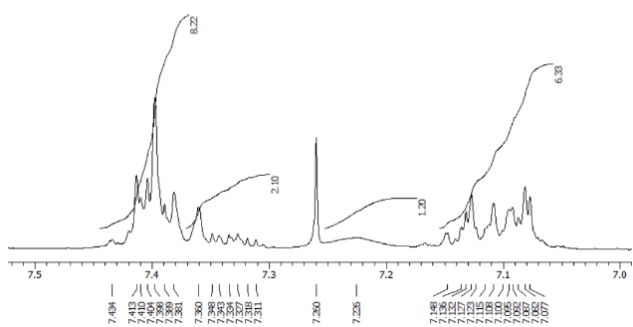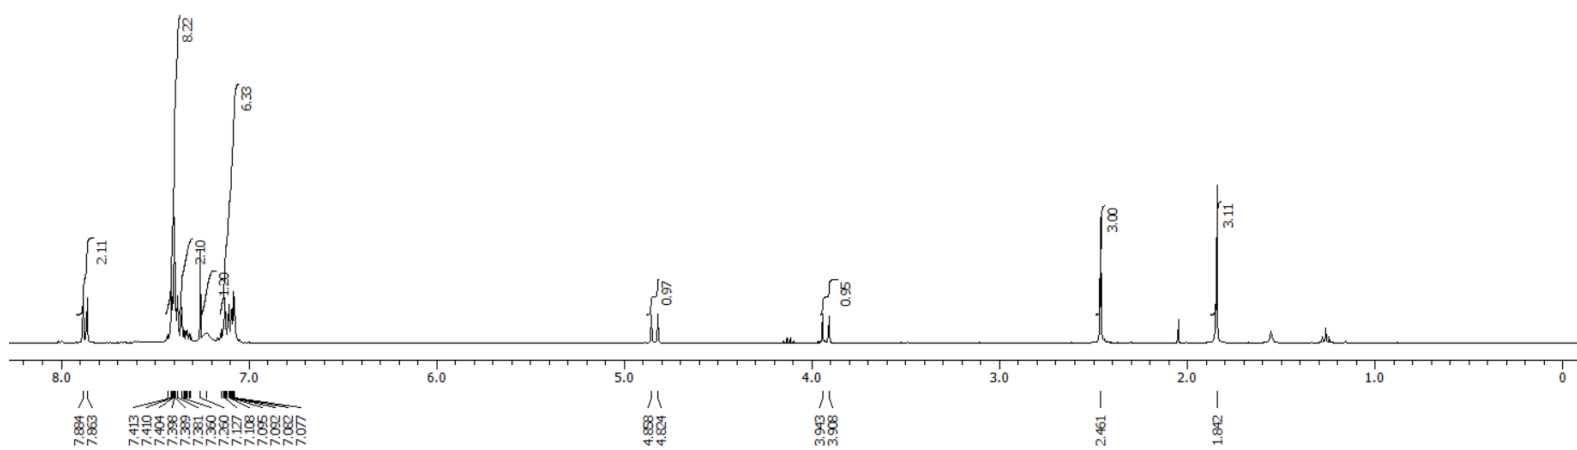

<sup>13</sup>C NMR spectrum of 3aa (100 MHz, CDCl<sub>3</sub>)

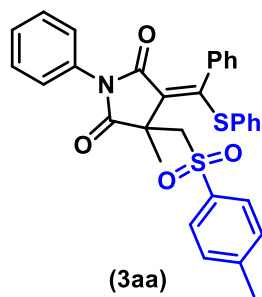

*(E)*-3-methyl-1-phenyl-4-(phenyl(phenylthio)methylene)-3-(tosylmethyl)pyrrolidine-2,5-dione

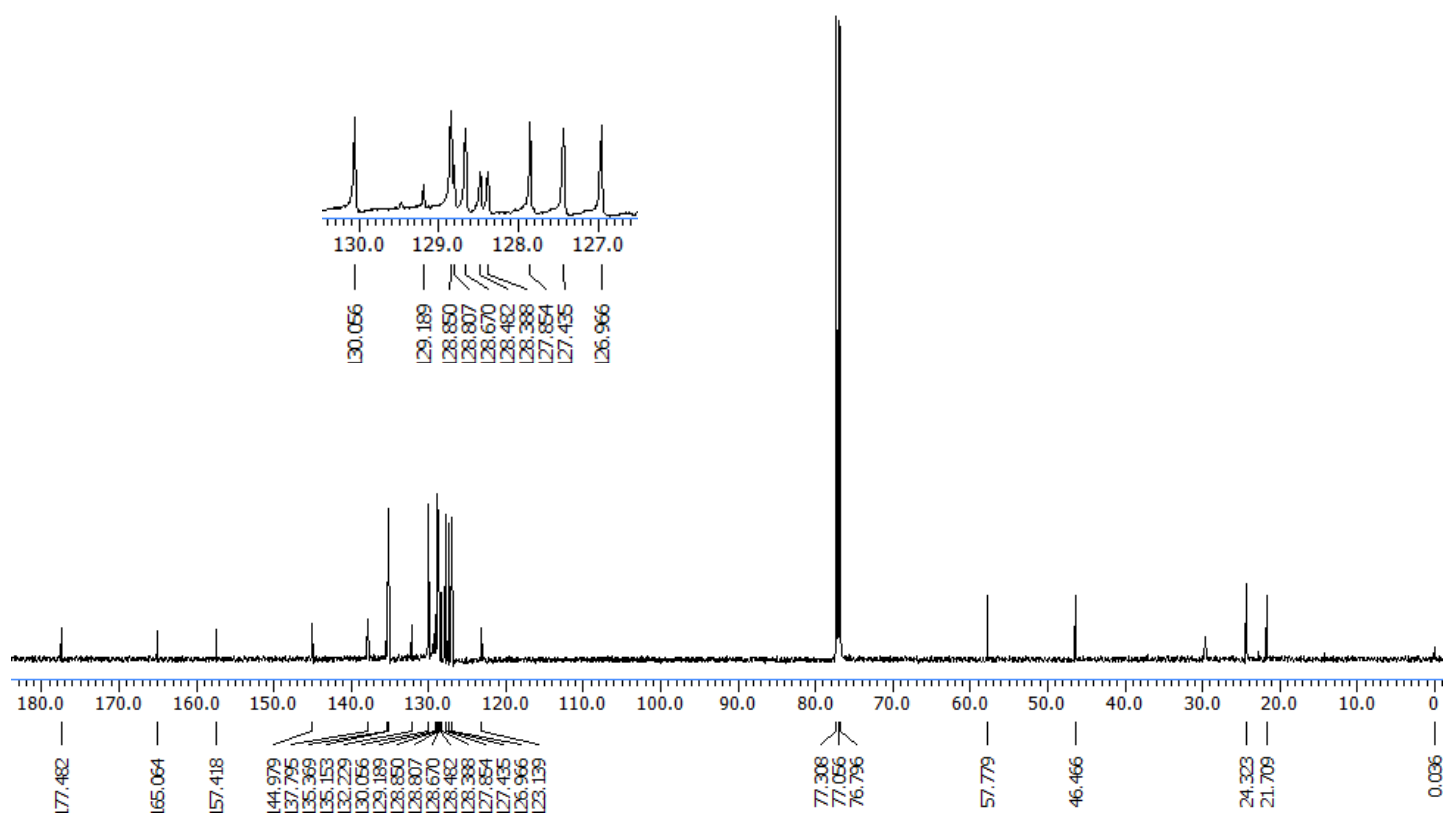

## HRMS Spectrum of 3aa



### (E)-3-methyl-1-phenyl-4-(phenyl(phenylthio)methylene)-3-(tosylmethyl)pyrrolidine-2,5-dione

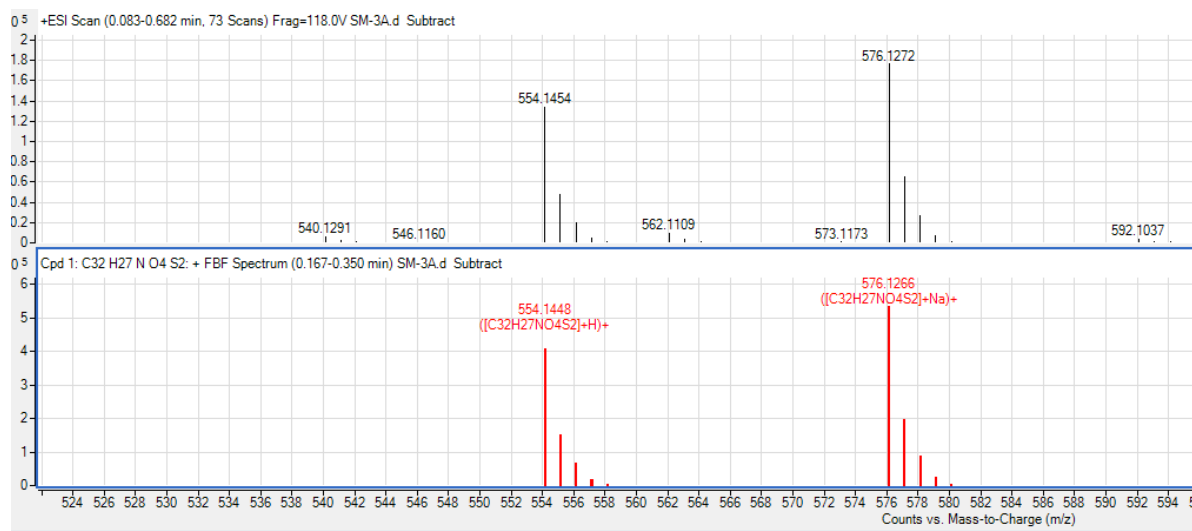

<sup>1</sup>H NMR spectrum of 3ab (400 MHz, CDCl<sub>3</sub>)

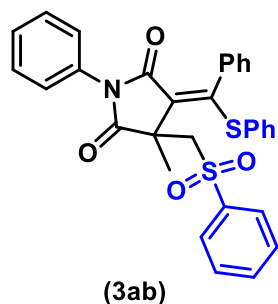

(*E*)-3-methyl-1-phenyl-4-(phenyl(phenylthio)methylene)-3-((phenylsulfonyl)methyl)pyrrolidine-2,5-dione

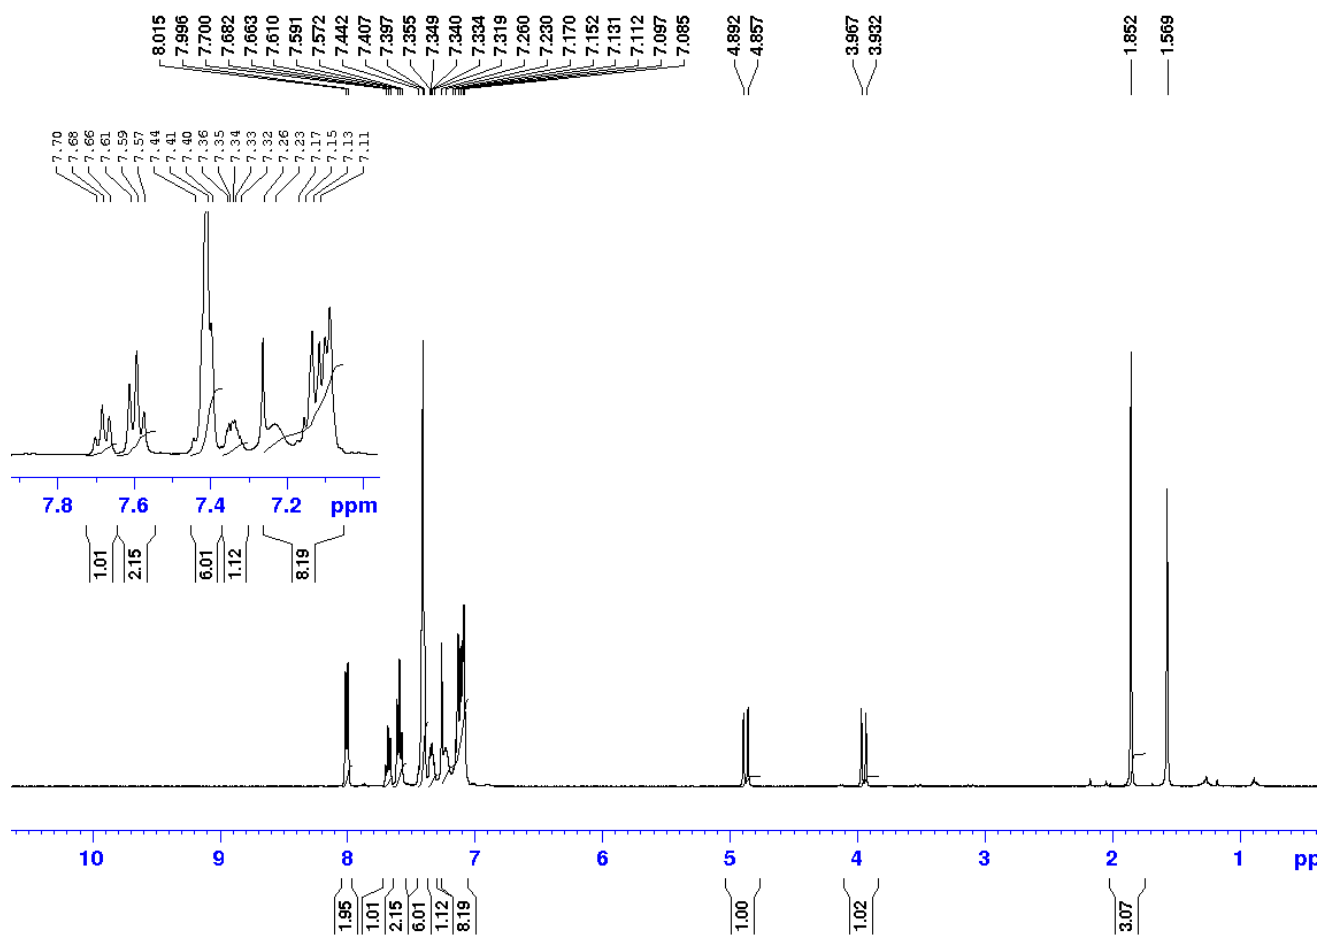

<sup>13</sup>C NMR spectrum of 3ab (100 MHz, CDCl<sub>3</sub>)

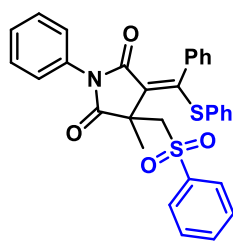

(3ab)

(*E*)-3-methyl-1-phenyl-4-(phenyl(phenylthio)methylene)-3-((phenylsulfonyl)methyl)pyrrolidine-2,5-dione

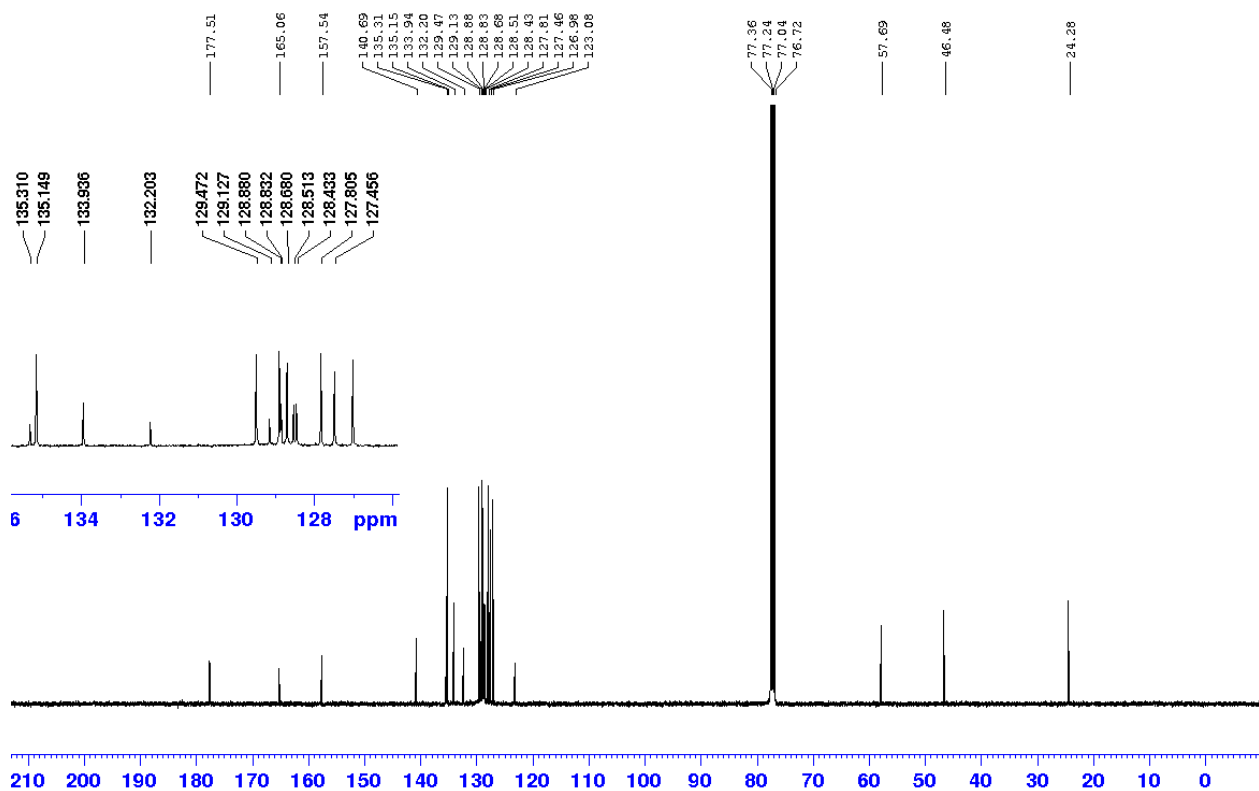

## HRMS Spectrum of 3ab

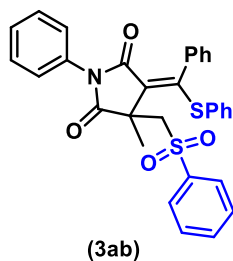

*(E)*-3-methyl-1-phenyl-4-(phenyl(phenylthio)methylene)-3-((phenylsulfonyl)methyl)pyrrolidine-2,5-dione

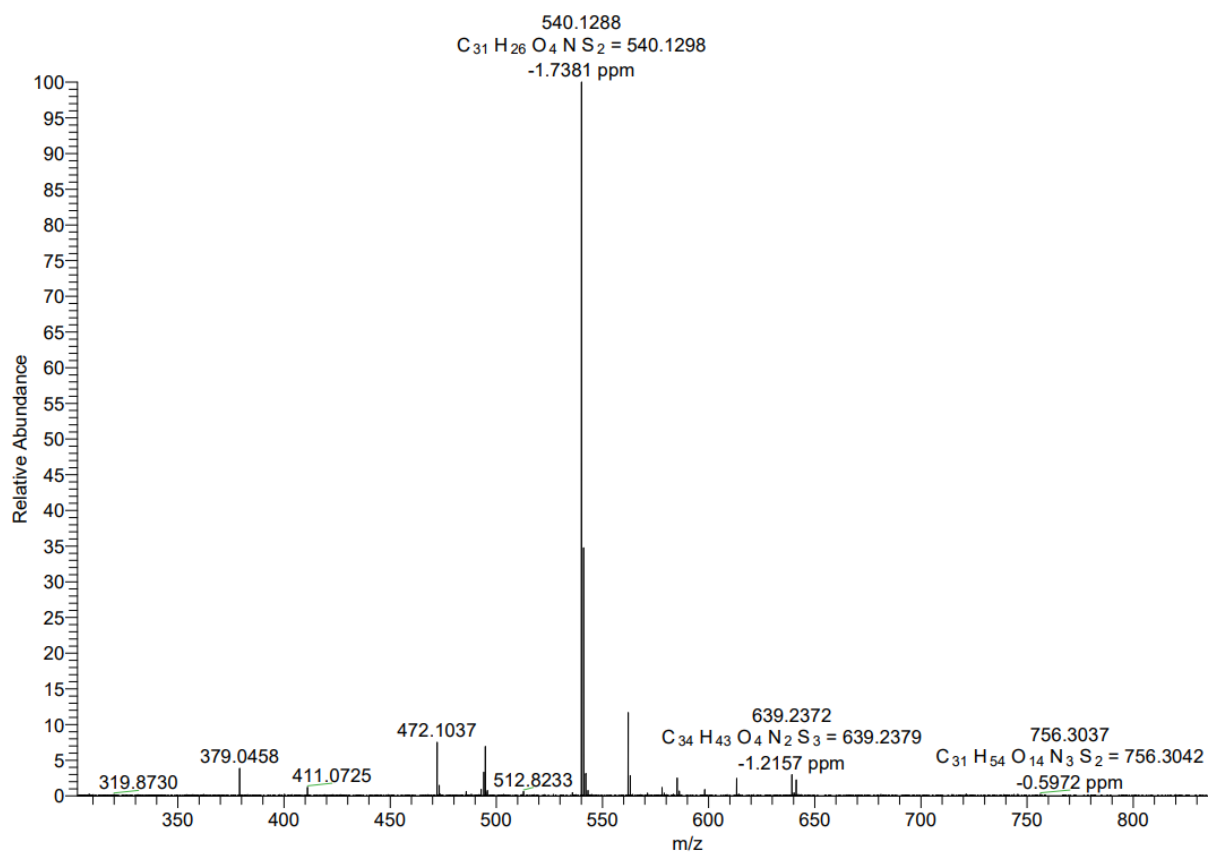

**<sup>1</sup>H NMR spectrum of 3ac (400 MHz, CDCl<sub>3</sub>)**

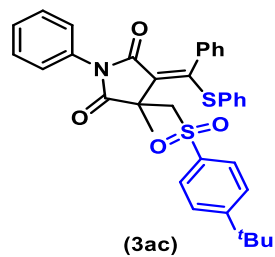

**(E)-3-(((4-(*tert*-butyl)phenyl)sulfonyl)methyl)-3-methyl-1-phenyl-4-(phenyl(phenylthio)methylene)pyrrolidine-2,5-dione**

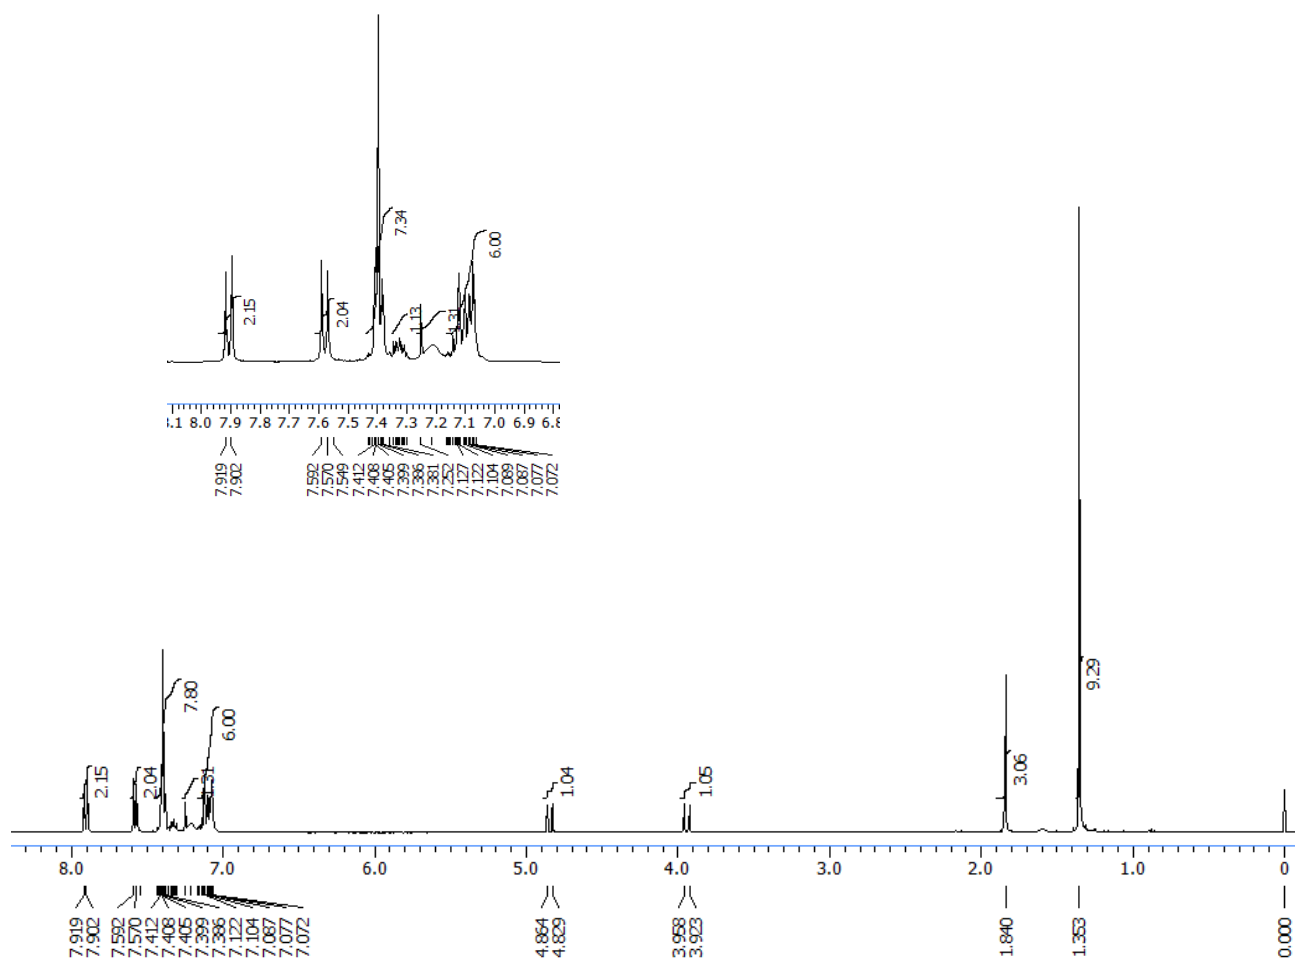

**$^{13}\text{C}$  NMR spectrum of 3ac (100 MHz,  $\text{CDCl}_3$ )**

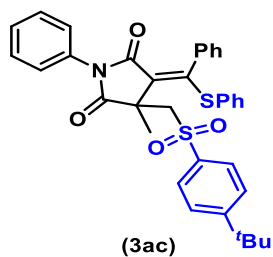

**(E)-3-(((4-(*tert*-butyl)phenyl)sulfonyl)methyl)-3-methyl-1-phenyl-4-(phenyl(phenylthio)methylene)pyrrolidine-2,5-dione**

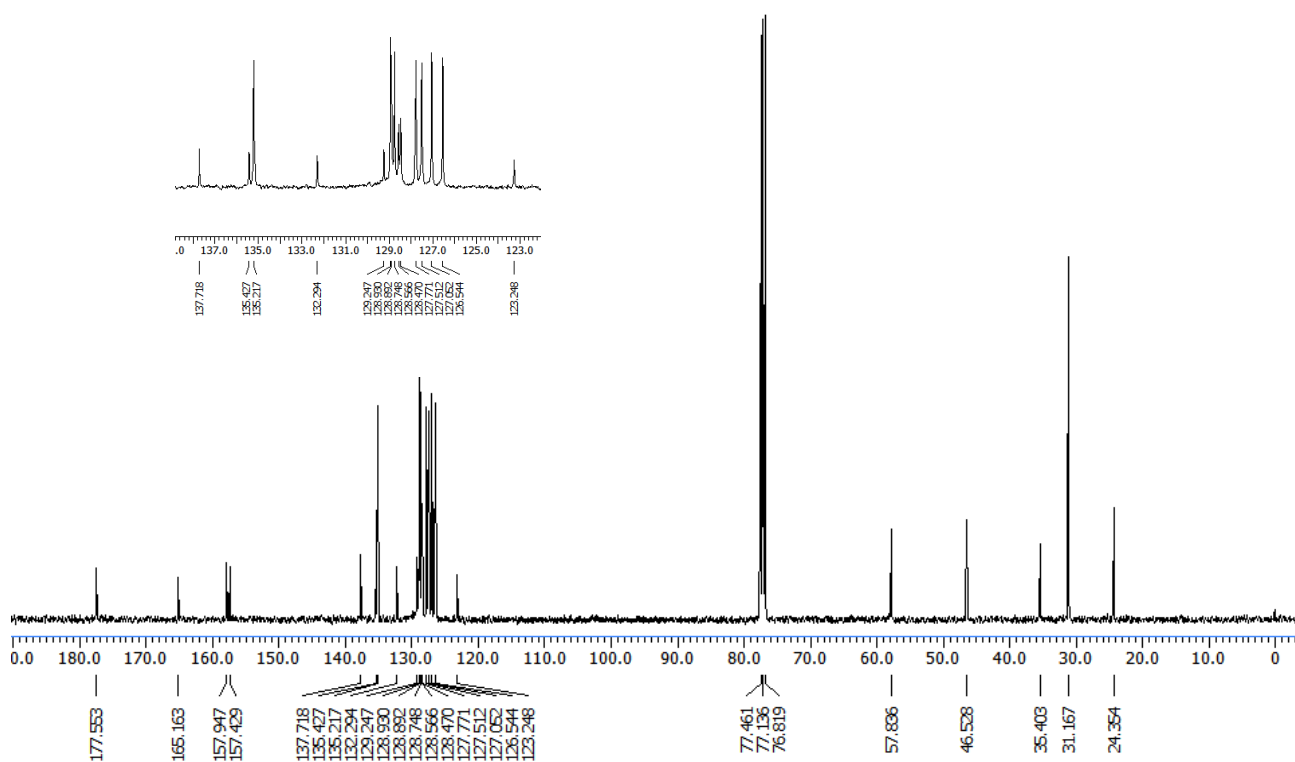



## HRMS Spectrum of 3ac



(E)-3-(((4-(*tert*-butyl)phenyl)sulfonyl)methyl)-3-methyl-1-phenyl-4-(phenyl(phenylthio)methylene)pyrrolidine-2,5-dione

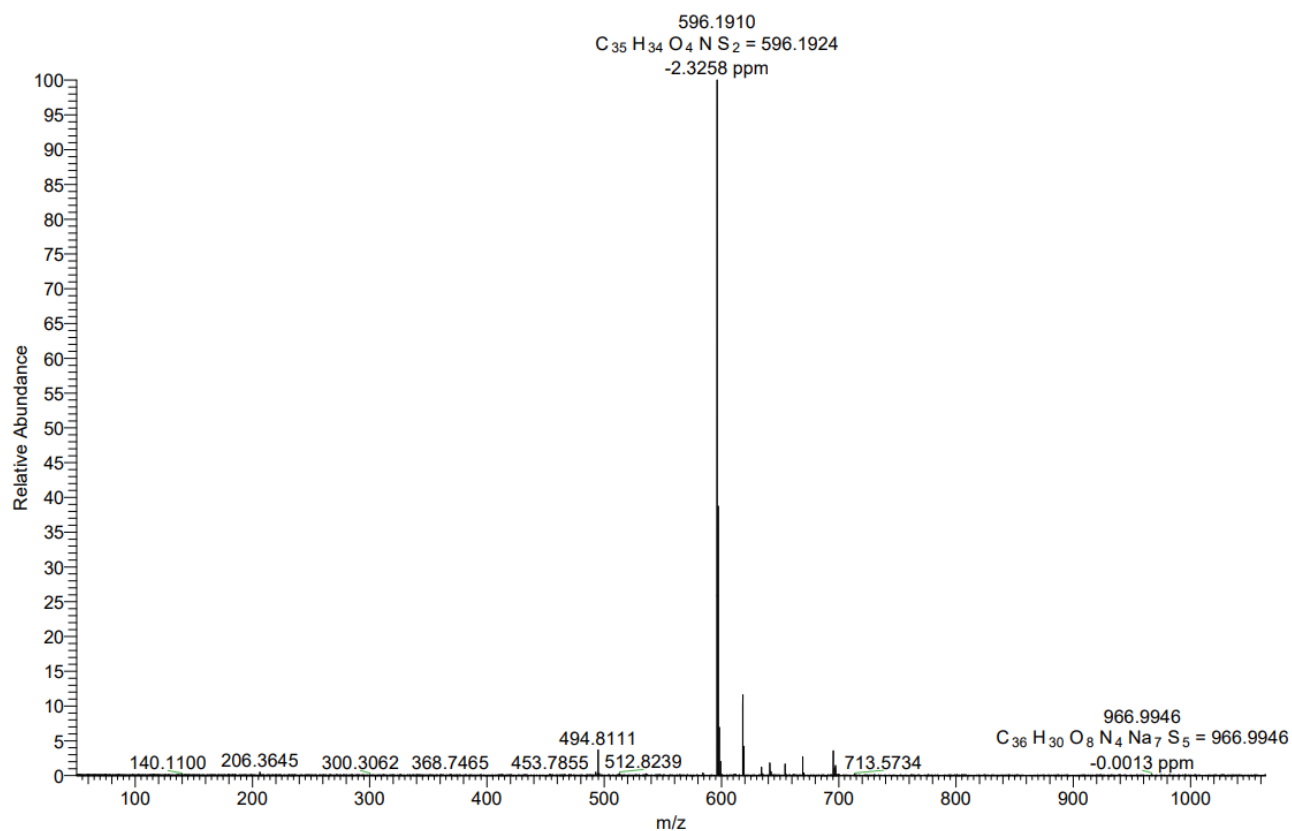

**<sup>1</sup>H NMR spectrum of 3ad (400 MHz, CDCl<sub>3</sub>)**

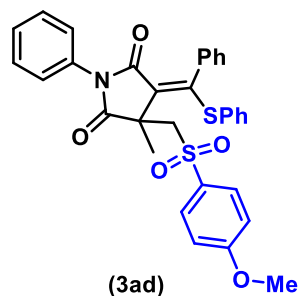

**(E)-3-(((4-methoxyphenyl)sulfonyl)methyl)-3-methyl-1-phenyl-4-(phenyl(phenylthio)methylene)pyrrolidine-2,5-dione**

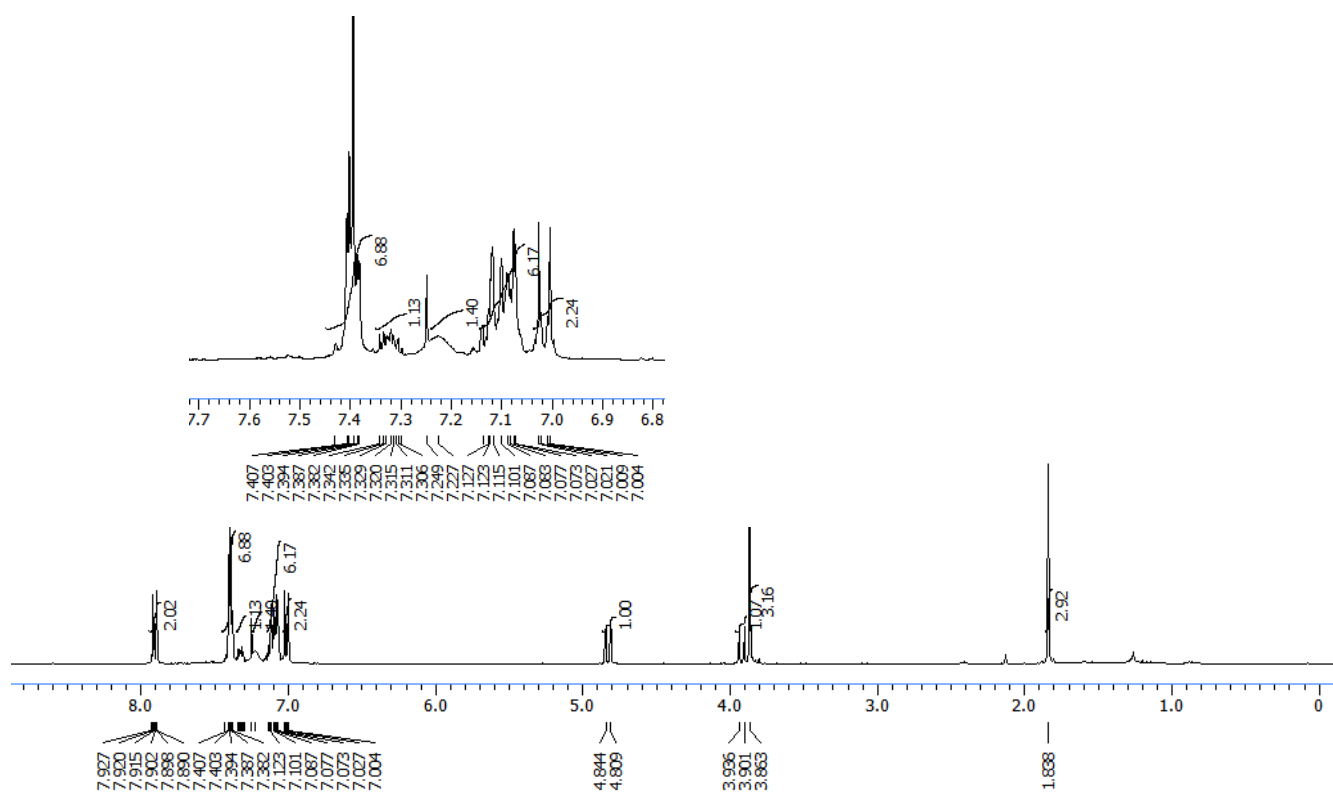

<sup>13</sup>C NMR spectrum of 3ad (100 MHz, CDCl<sub>3</sub>)

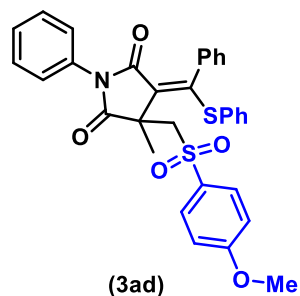

*(E)*-3-(((4-methoxyphenyl)sulfonyl)methyl)-3-methyl-1-phenyl-4-(phenyl(phenylthio)methylene)pyrrolidine-2,5-dione

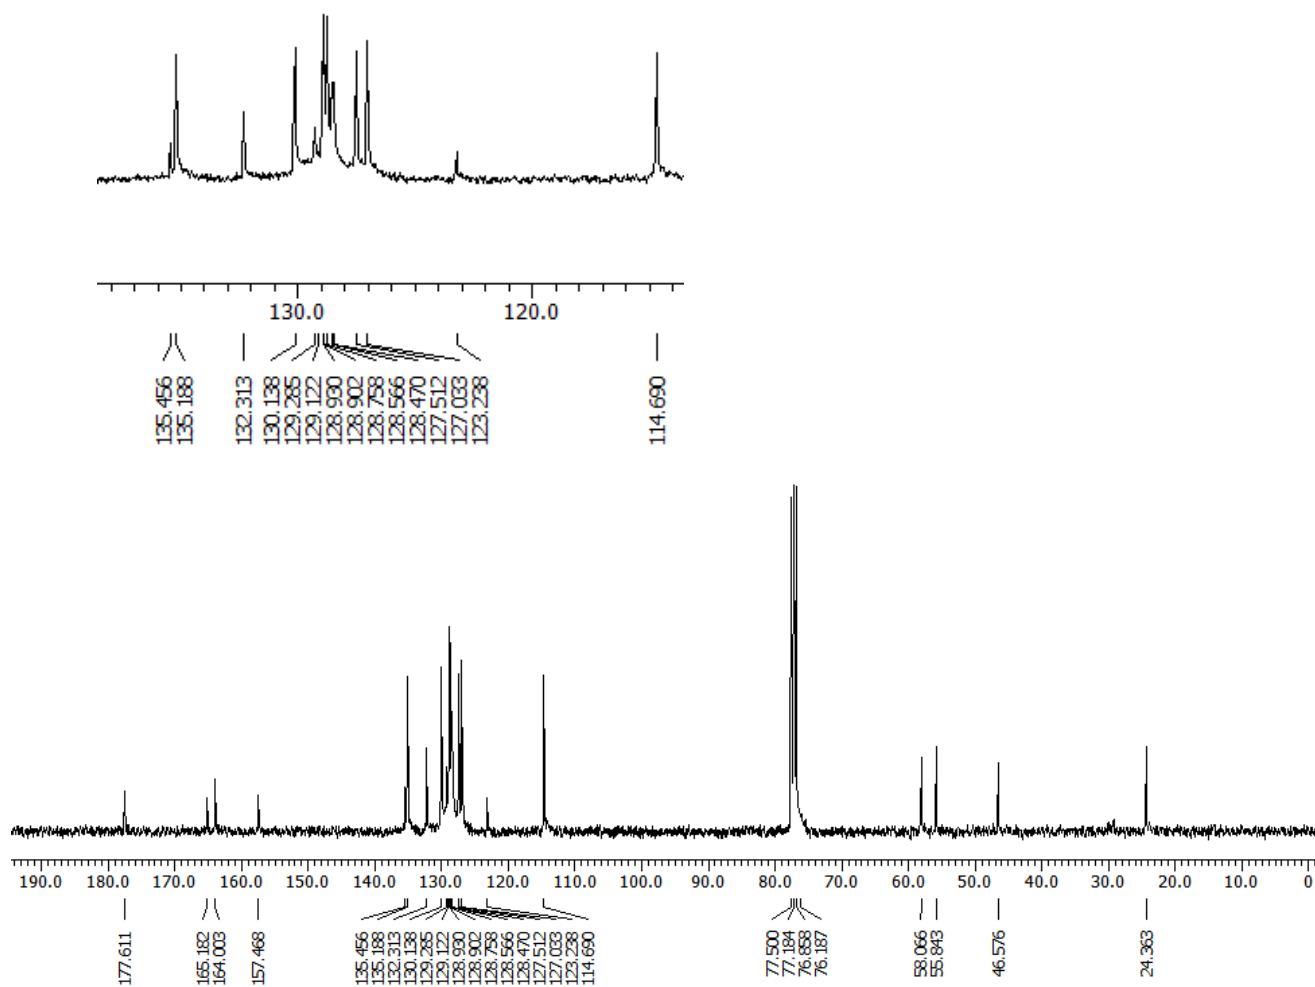

## HRMS Spectrum of 3ad

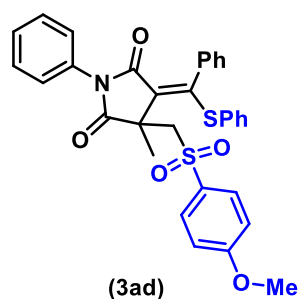

(E)-3-(((4-methoxyphenyl)sulfonyl)methyl)-3-methyl-1-phenyl-4-(phenyl(phenylthio)methylene)pyrrolidine-2,5-dione

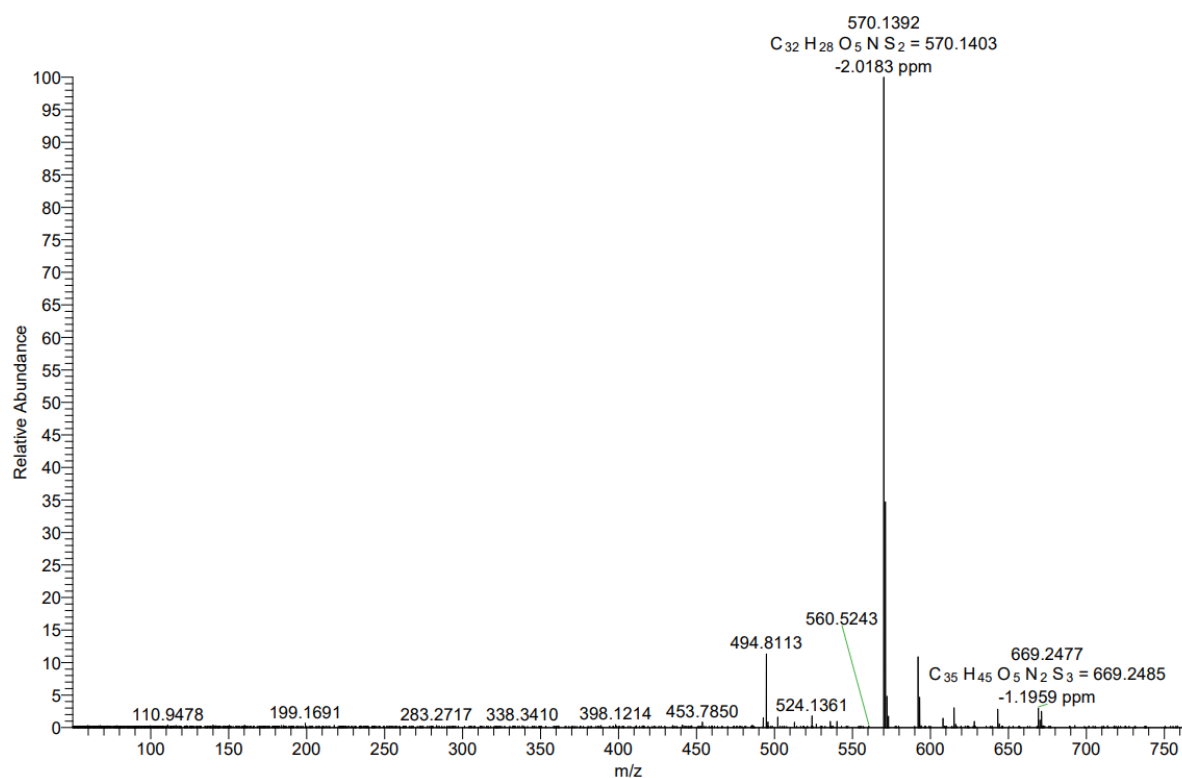

**<sup>1</sup>H NMR spectrum of 3ae (400 MHz, CDCl<sub>3</sub>)**

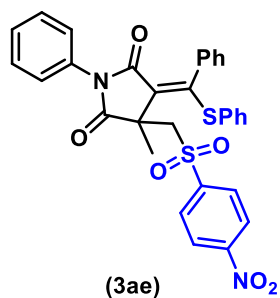

**(E)-3-methyl-3-(((4-nitrophenyl)sulfonyl)methyl)-1-phenyl-4-(phenyl(phenylthio)methylene)pyrrolidine-2,5-dione**

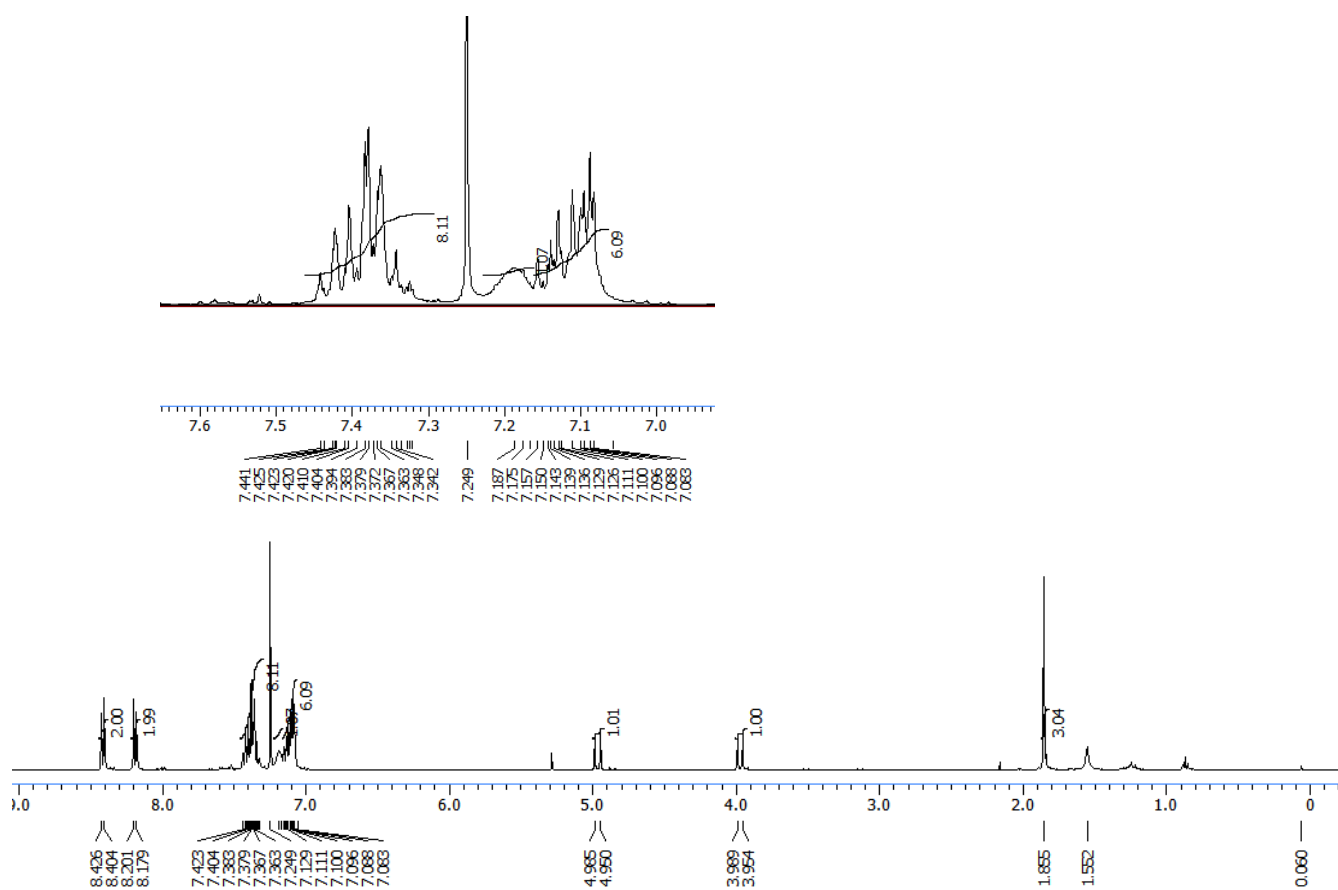

<sup>13</sup>C NMR spectrum of 3ae (100 MHz, CDCl<sub>3</sub>)

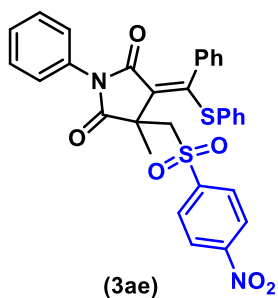

*(E)*-3-methyl-3-(((4-nitrophenyl)sulfonyl)methyl)-1-phenyl-4-(phenyl(phenylthio)methylene)pyrrolidine-2,5-dione

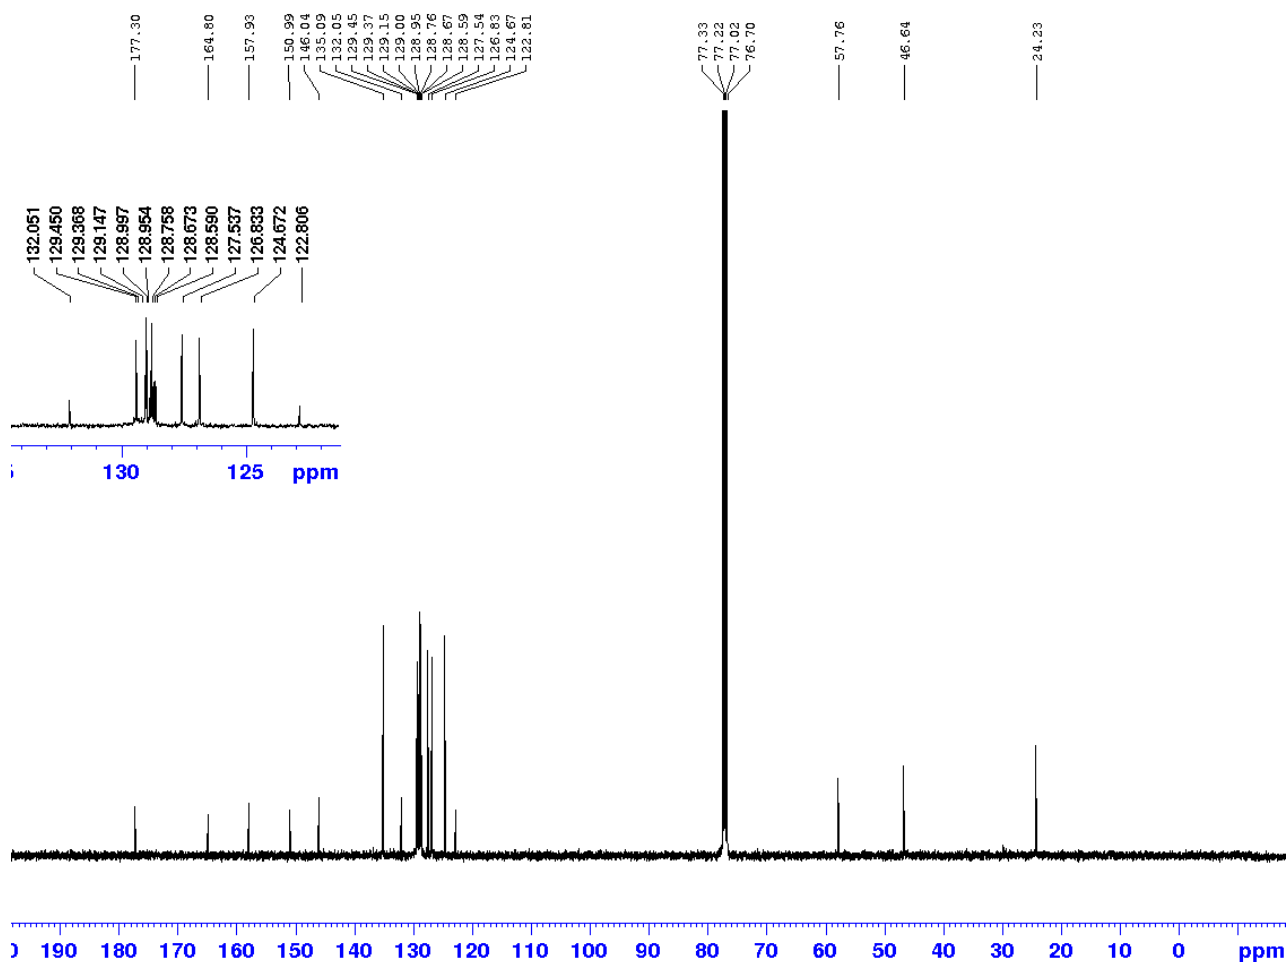

## HRMS Spectrum of 3ae



*(E)*-3-methyl-3-(((4-nitrophenyl)sulfonyl)methyl)-1-phenyl-4-(phenyl(phenylthio)methylene)pyrrolidine-2,5-dione

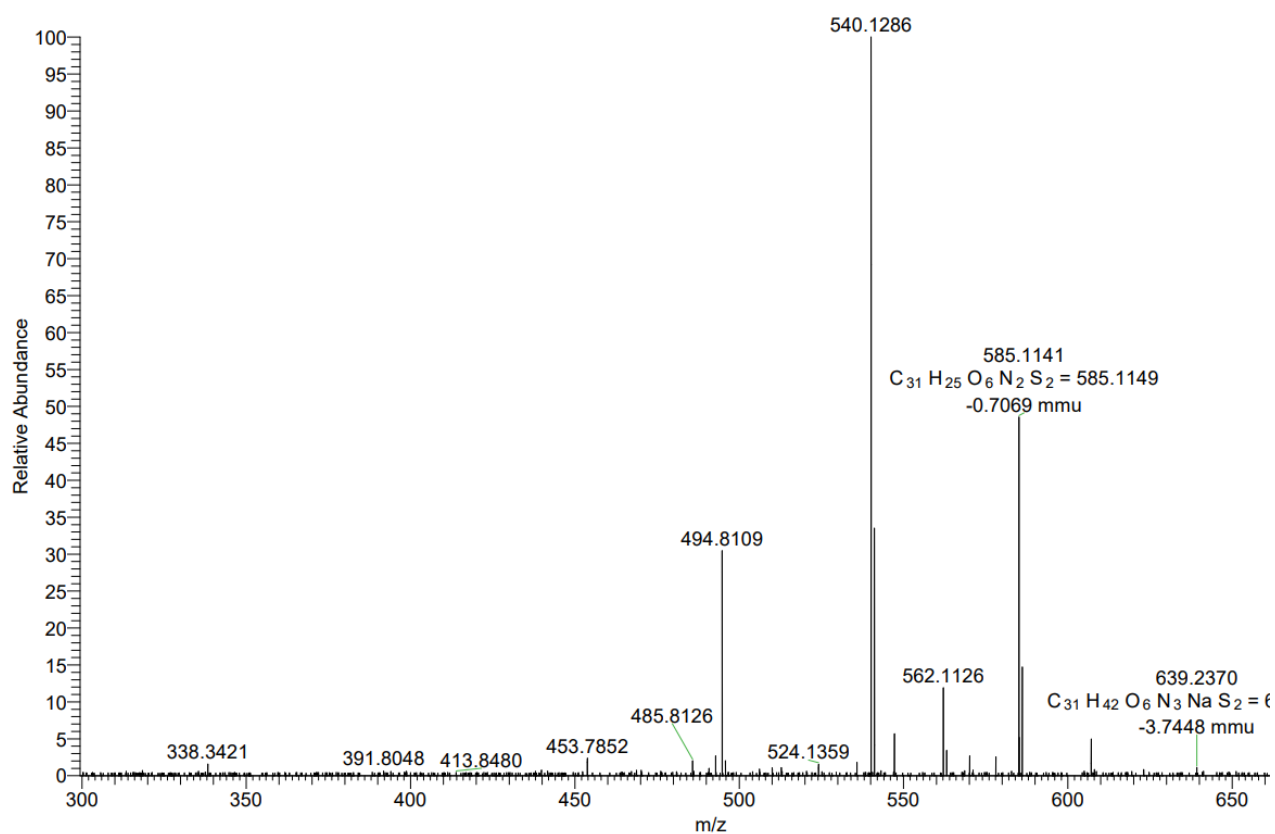

**<sup>1</sup>H NMR spectrum of 3af (400 MHz, CDCl<sub>3</sub>)**

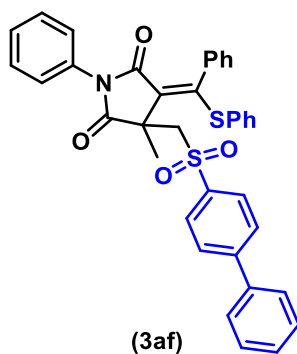

**(E)-3-(((1,1'-biphenyl)-4-ylsulfonyl)methyl)-3-methyl-1-phenyl-4-(phenyl(phenylthio)methylene)pyrrolidine-2,5-dione**

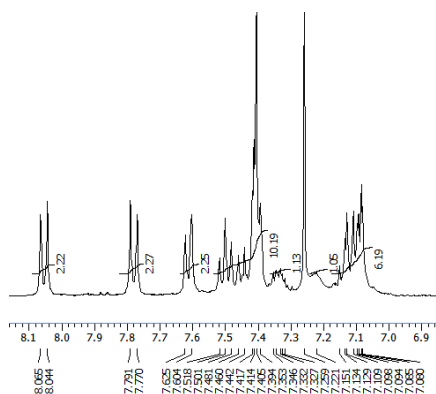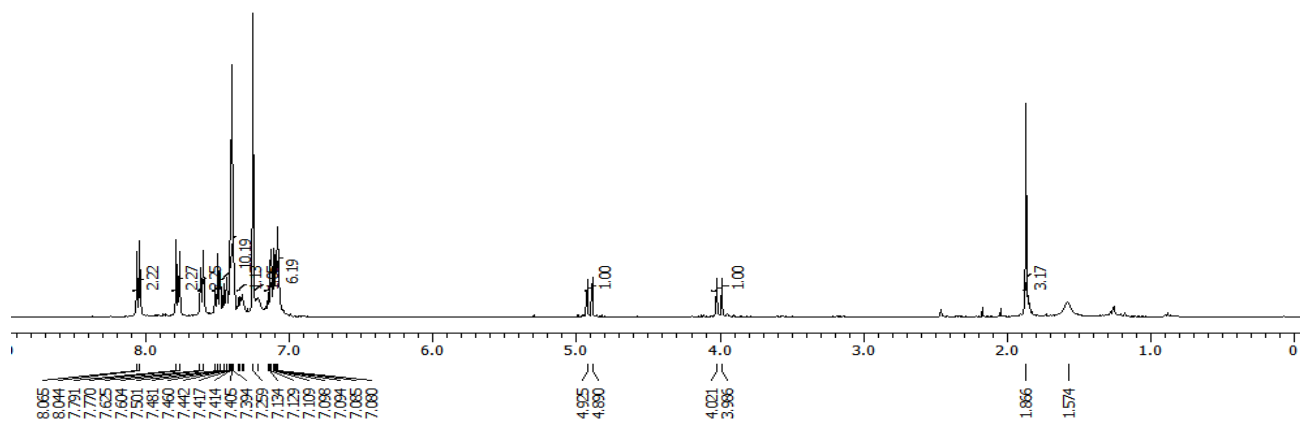



<sup>13</sup>C NMR spectrum of 3af (100 MHz, CDCl<sub>3</sub>)

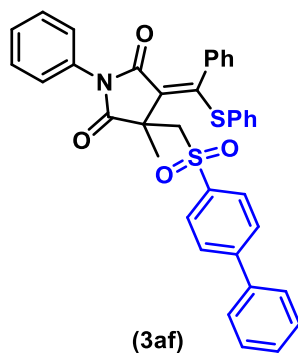

(E)-3-(((1,1'-biphenyl]-4-ylsulfonyl)methyl)-3-methyl-1-phenyl-4-(phenyl(phenylthio)methylene)pyrrolidine-2,5-dione

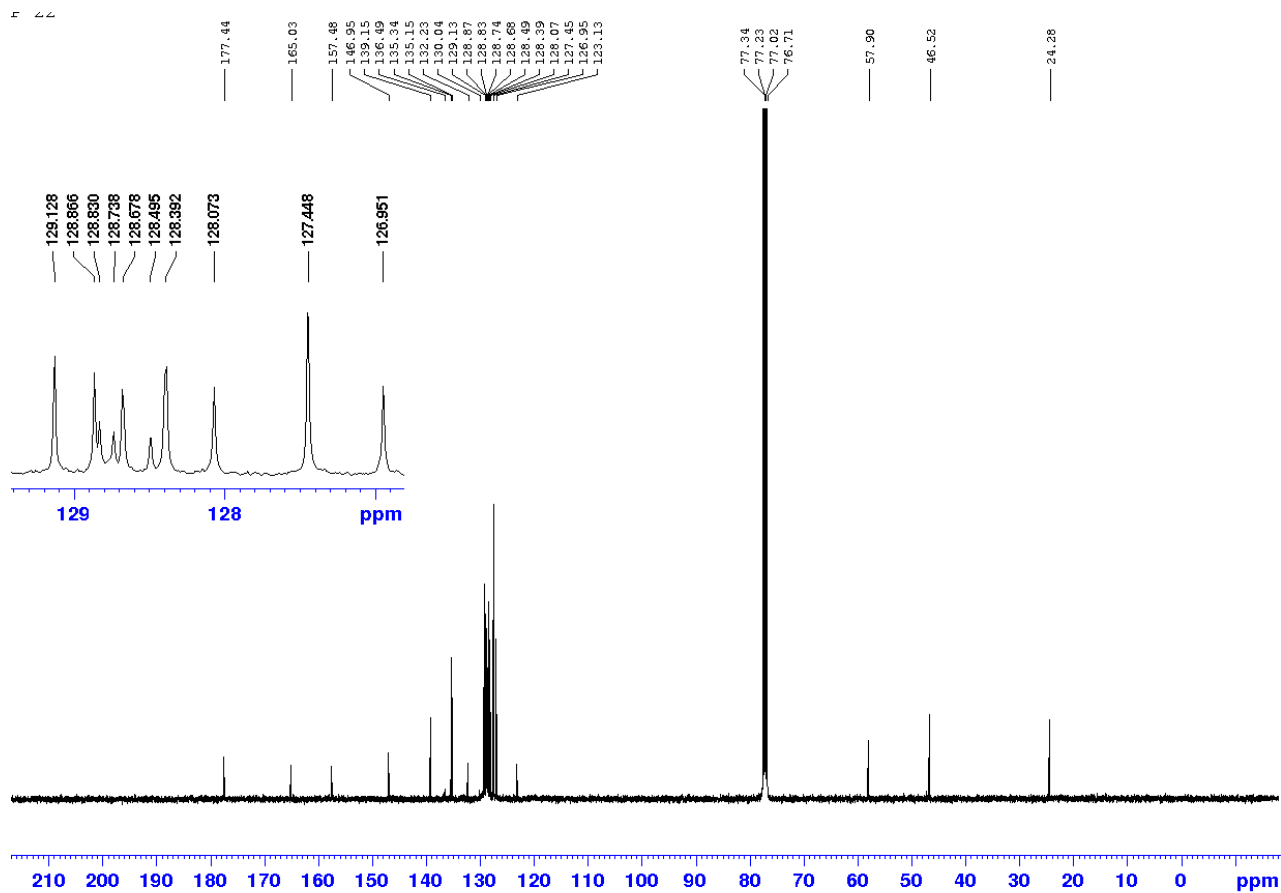

## HRMS Spectrum of 3af

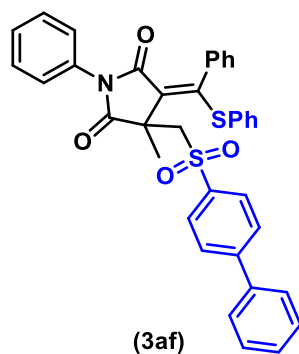

**(E)-3-((1,1'-biphenyl]-4-ylsulfonyl)methyl)-3-methyl-1-phenyl-4-(phenyl(phenylthio)methylene)pyrrolidine-2,5-dione**

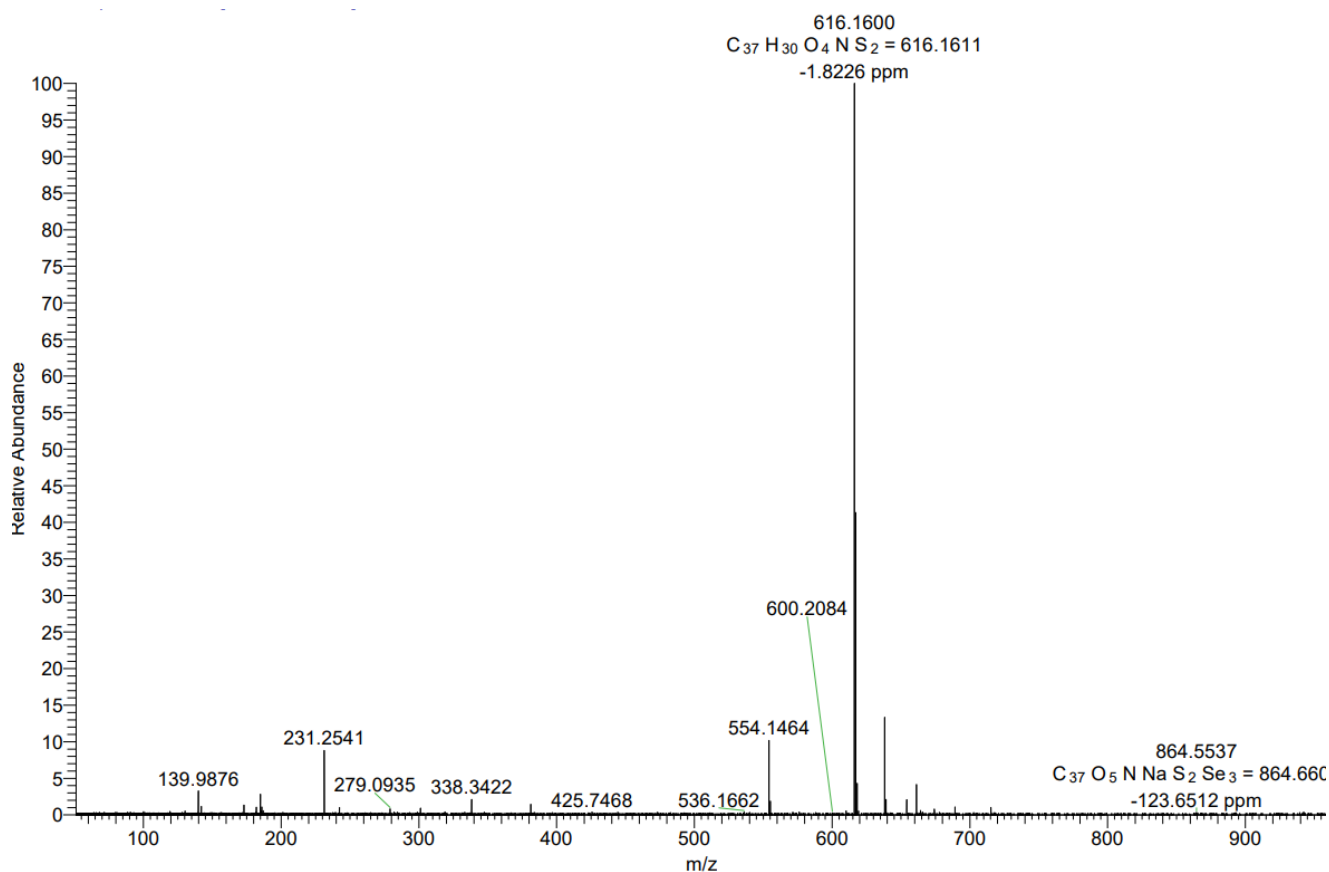

**<sup>1</sup>H NMR spectrum of 3ag (400 MHz, CDCl<sub>3</sub>)**

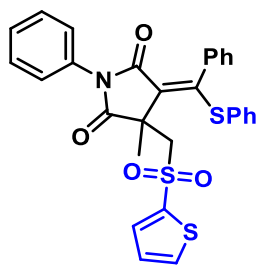

**(3ag)**

**(E)-3-methyl-1-phenyl-4-(phenyl(phenylthio)methylene)-3-((thiophen-2-ylsulfonyl)methyl)pyrrolidine-2,5-dione**

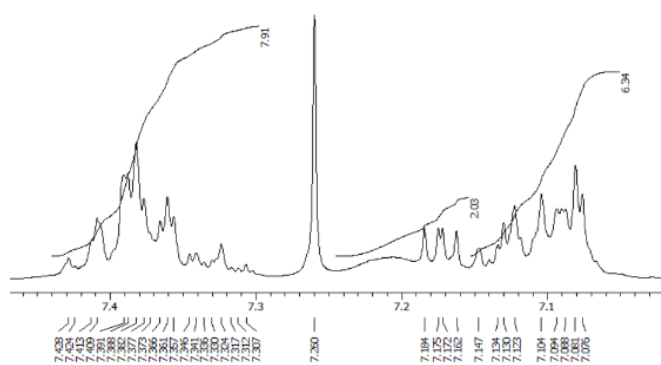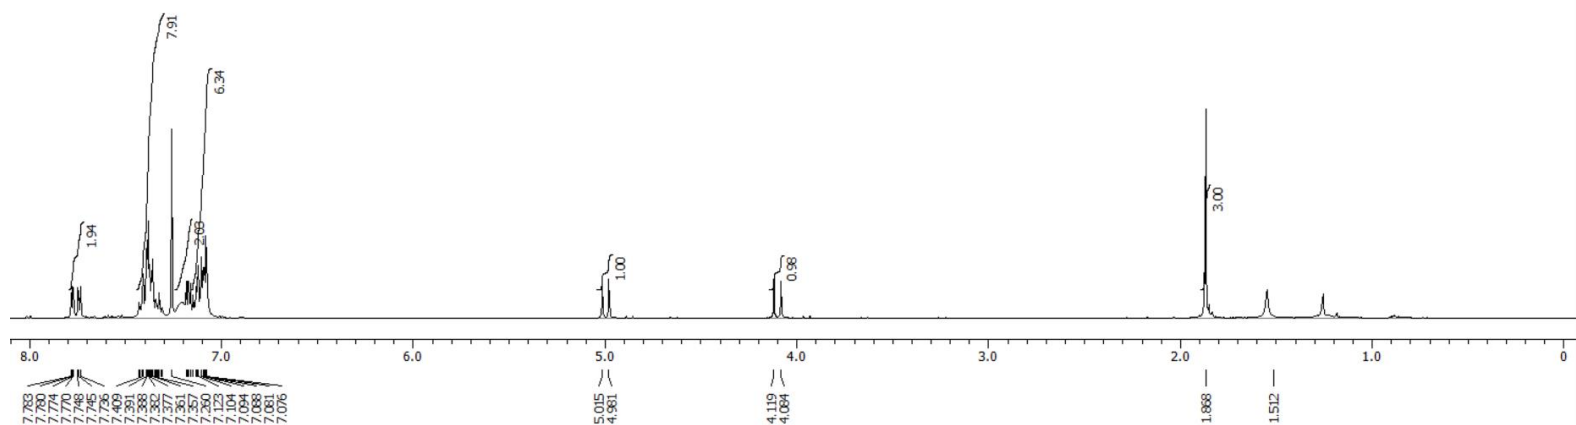

**<sup>13</sup>C NMR spectrum of 3ag (100 MHz, CDCl<sub>3</sub>)**

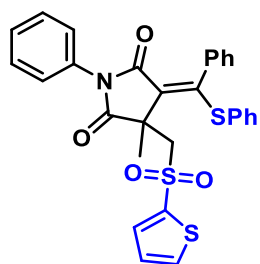

**(3ag)**

**(*E*)-3-methyl-1-phenyl-4-(phenyl(phenylthio)methylene)-3-((thiophen-2-ylsulfonyl)methyl)pyrrolidine-2,5-dione**

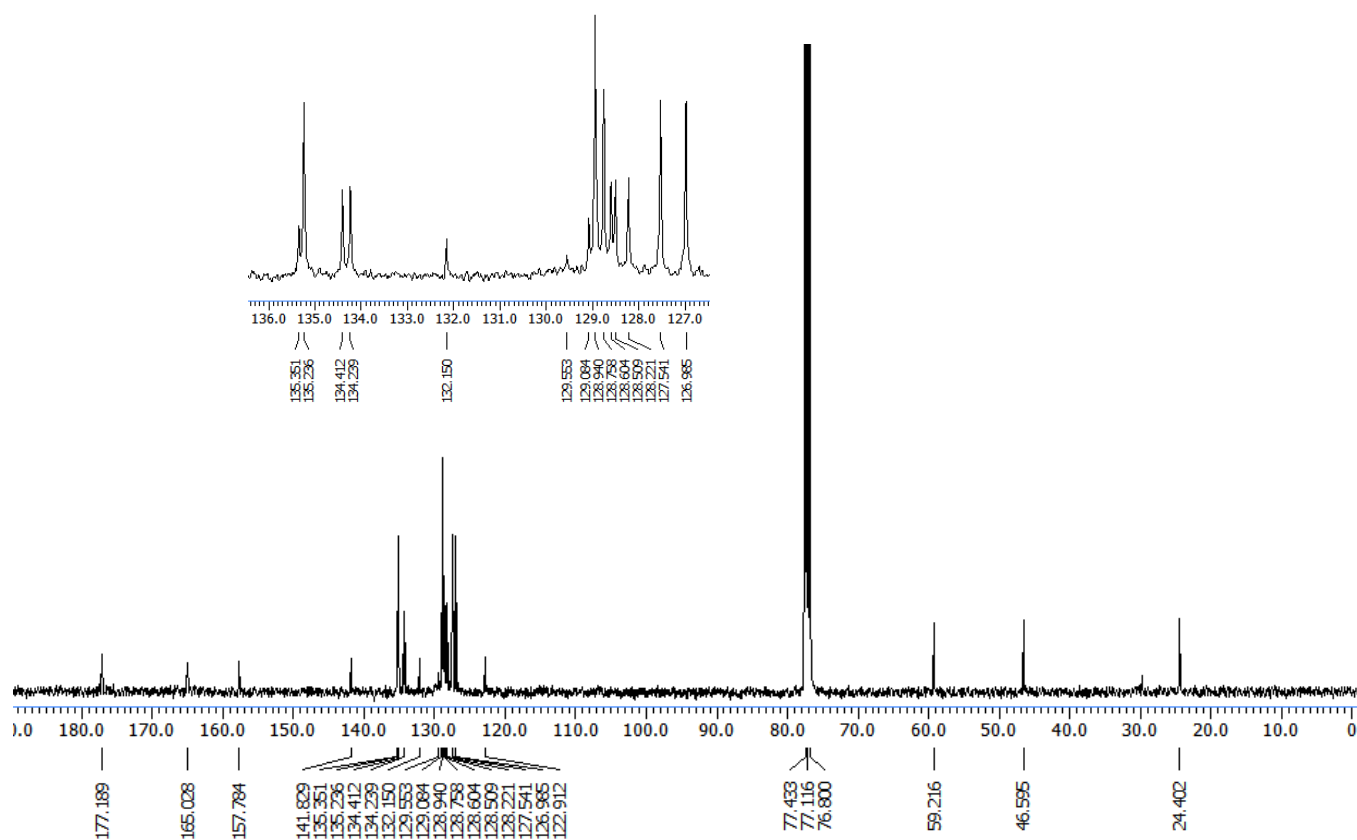

**HRMS Spectrum of 3ag**

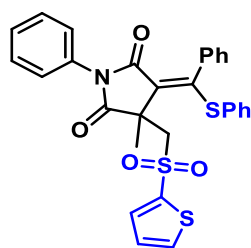

(3ag)

(E)-3-methyl-1-phenyl-4-(phenyl(phenylthio)methylene)-3-((thiophen-2-ylsulfonyl)methyl)pyrrolidine-2,5-dione

## Qualitative Compound Report

|                        |              |               |                     |
|------------------------|--------------|---------------|---------------------|
| Data File              | SMP-25.d     | Sample Name   | SMP-25              |
| Sample Type            | Sample       | Position      | P1-A9               |
| Instrument Name        | Instrument 1 | User Name     |                     |
| Acq Method             | MS Scan.m    | Acquired Time | 21-05-2022 12:28:47 |
| IRM Calibration Status | Success      | DA Method     | Default.m           |
| Comment                |              |               |                     |

|                |                             |   |
|----------------|-----------------------------|---|
| Sample Group   | Info.                       | 3 |
| Acquisition SW | 6200 series TOF/6500 series |   |
| Version        | Q-TOF B.05.01 (B5125)       |   |

### Compound Table

| Compound Label                                                          | RT    | Mass     | Formula                                                         | MFG Formula                                                     | MFG Diff (ppm) | DB Formula                                                      |
|-------------------------------------------------------------------------|-------|----------|-----------------------------------------------------------------|-----------------------------------------------------------------|----------------|-----------------------------------------------------------------|
| Cpd 16: C <sub>29</sub> H <sub>23</sub> N O <sub>4</sub> S <sub>3</sub> | 0.185 | 545.0804 | C <sub>29</sub> H <sub>23</sub> N O <sub>4</sub> S <sub>3</sub> | C <sub>29</sub> H <sub>23</sub> N O <sub>4</sub> S <sub>3</sub> | -2.8           | C <sub>29</sub> H <sub>23</sub> N O <sub>4</sub> S <sub>3</sub> |

| Compound Label                                                          | m/z      | RT    | Algorithm                 | Mass     |
|-------------------------------------------------------------------------|----------|-------|---------------------------|----------|
| Cpd 16: C <sub>29</sub> H <sub>23</sub> N O <sub>4</sub> S <sub>3</sub> | 546.0879 | 0.185 | Find by Molecular Feature | 545.0804 |

### MFE MS Spectrum

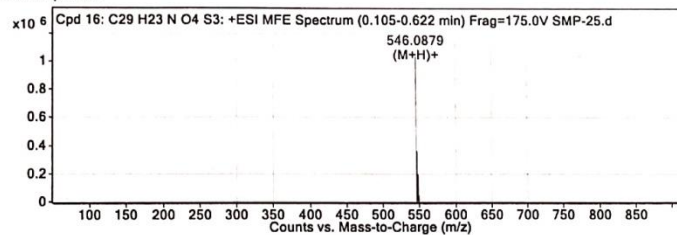

### MFE MS Zoomed Spectrum

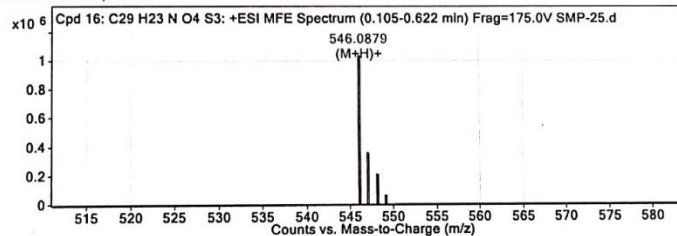

### MS Spectrum Peak List

| m/z      | z | Abund      | Formula                                                         | Ion                |
|----------|---|------------|-----------------------------------------------------------------|--------------------|
| 546.0879 | 1 | 1044326.25 | C <sub>29</sub> H <sub>24</sub> N O <sub>4</sub> S <sub>3</sub> | (M+H) <sup>+</sup> |
| 547.0905 | 1 | 361133.85  | C <sub>29</sub> H <sub>24</sub> N O <sub>4</sub> S <sub>3</sub> | (M+H) <sup>+</sup> |
| 548.0866 | 1 | 196223.48  | C <sub>29</sub> H <sub>24</sub> N O <sub>4</sub> S <sub>3</sub> | (M+H) <sup>+</sup> |
| 549.0876 | 1 | 48562.02   | C <sub>29</sub> H <sub>24</sub> N O <sub>4</sub> S <sub>3</sub> | (M+H) <sup>+</sup> |

<sup>1</sup>H NMR spectrum of 3ah (400 MHz, CDCl<sub>3</sub>)

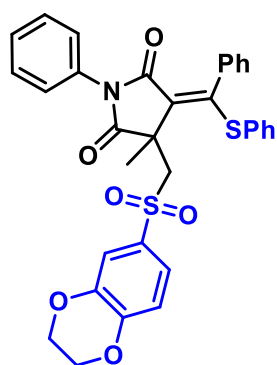

(3ah)

(E)-3-(((2,3-dihydrobenzo[b][1,4]dioxin-6-yl)sulfonyl)methyl)-3-methyl-1-phenyl-4-(phenyl(phenylthio)methylene)pyrrolidine-2,5-dione

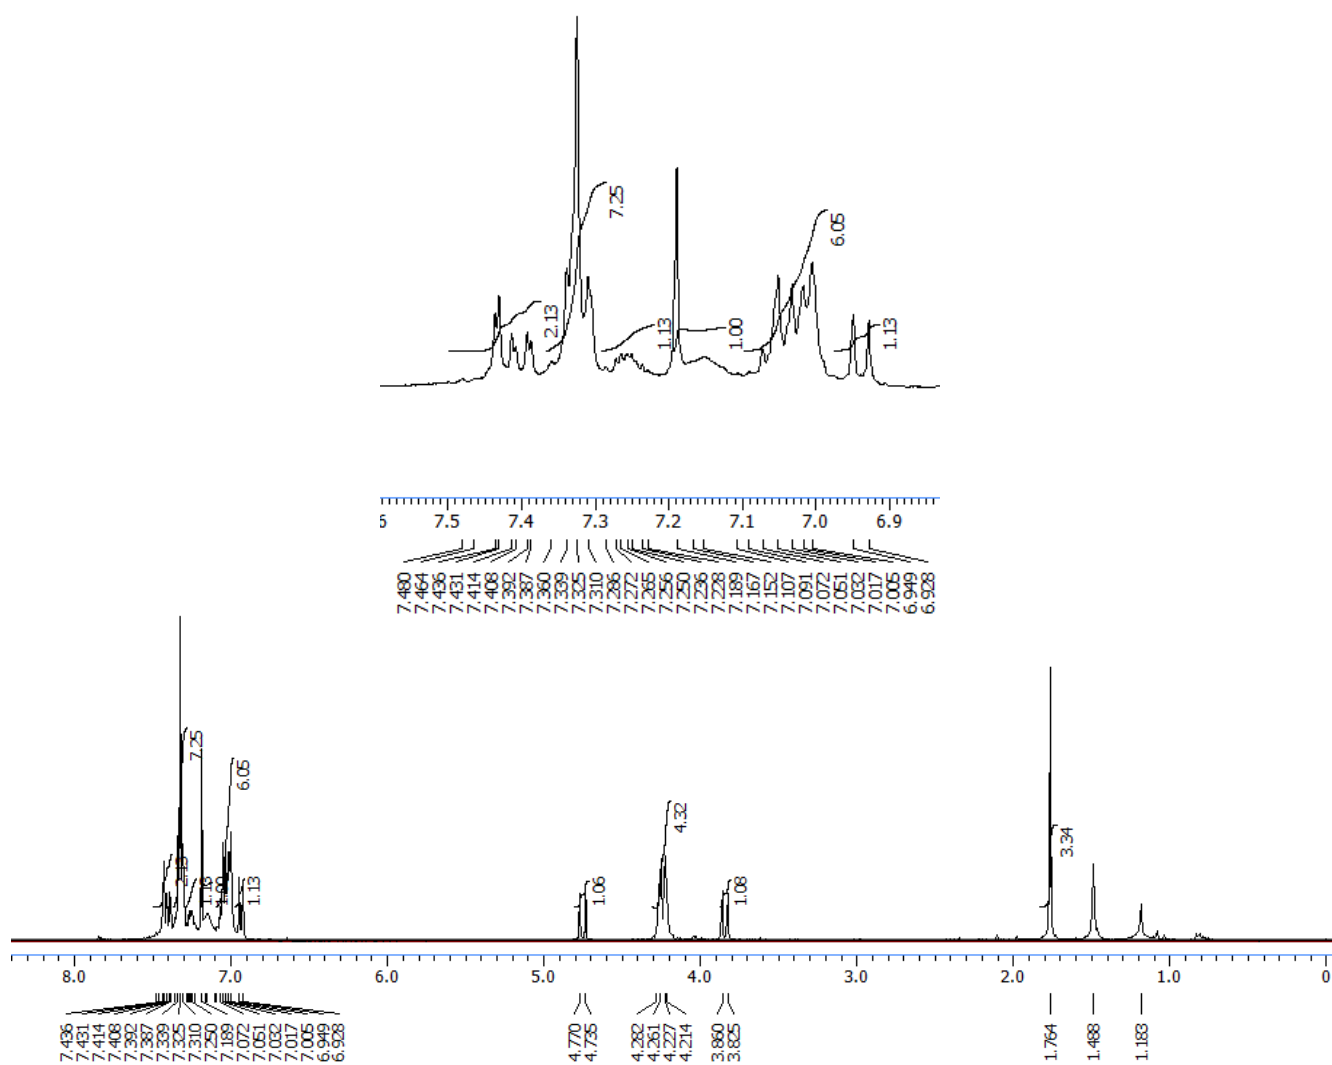

<sup>13</sup>C NMR spectrum of 3ah (100 MHz, CDCl<sub>3</sub>)

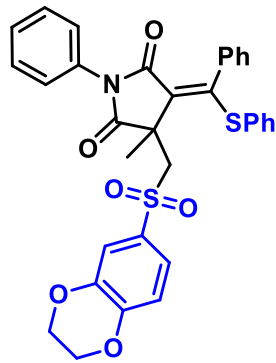

(3ah)

(*E*)-3-(((2,3-dihydrobenzo[*b*][1,4]dioxin-6-yl)sulfonyl)methyl)-3-methyl-1-phenyl-4-phenylthio)methylene)pyrrolidine-2,5-dione

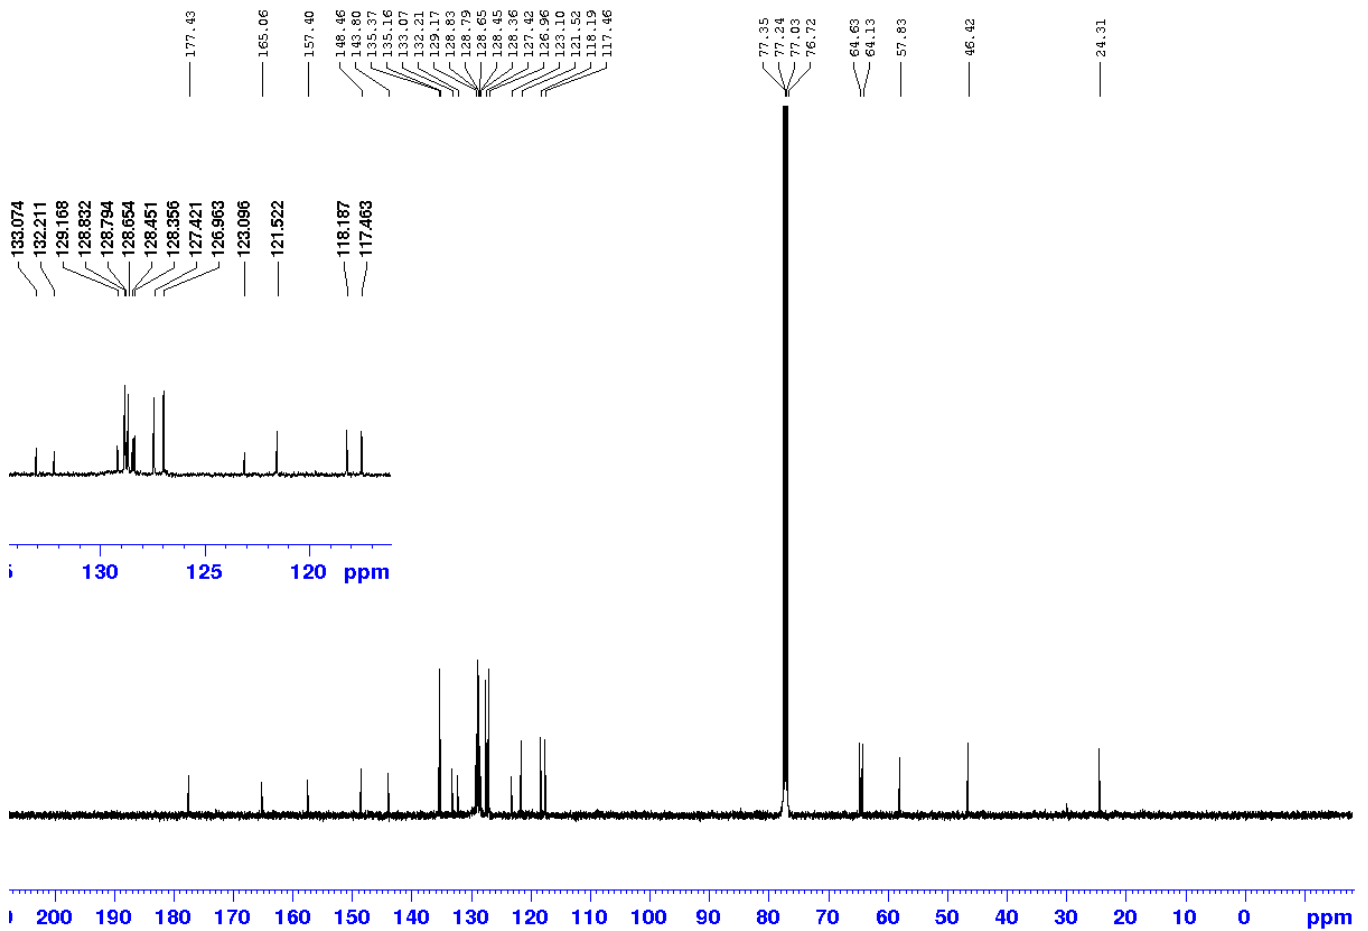

HRMS Spectrum of 3ah

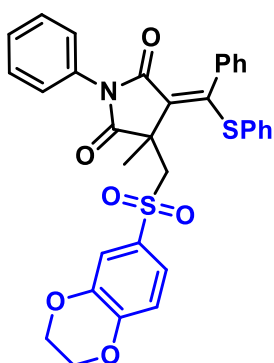

(3ah)

**(E)-3-(((2,3-dihydrobenzo[*b*][1,4]dioxin-6-yl)sulfonyl)methyl)-3-methyl-1-phenyl-4-(phenyl(phenylthio)methylene)pyrrolidine-2,5-dione**

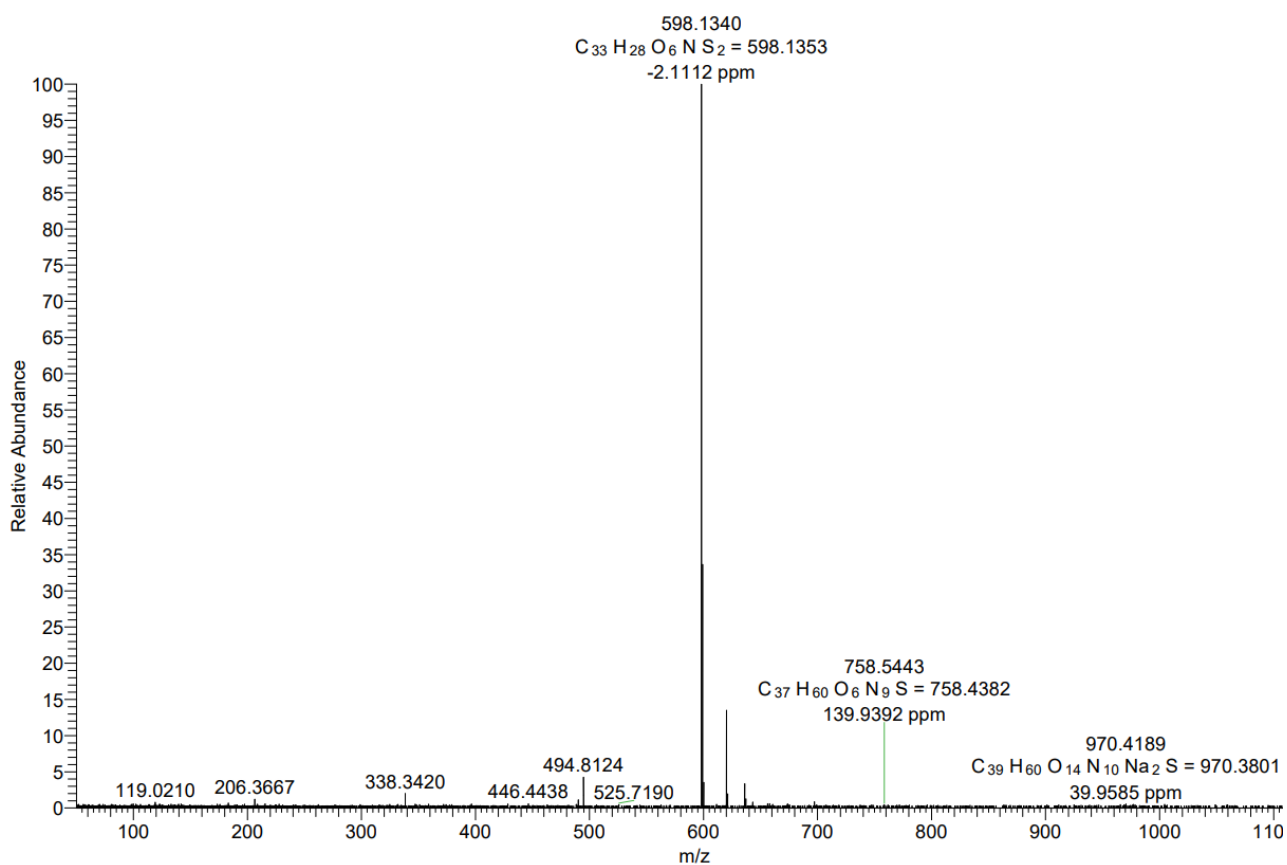

**<sup>1</sup>H NMR spectrum of 3ai (400 MHz, CDCl<sub>3</sub>)**



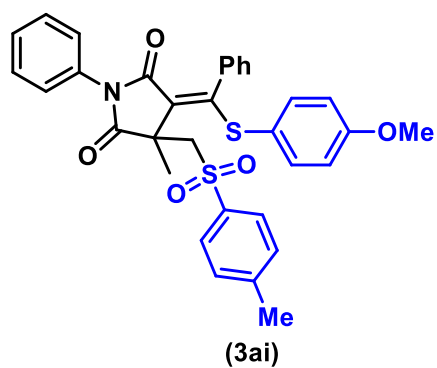

**(E)-4-(((4-methoxyphenyl)thio)(phenyl)methylene)-3-methyl-1-phenyl-3-(tosylmethyl)pyrrolidine-2,5-dione**

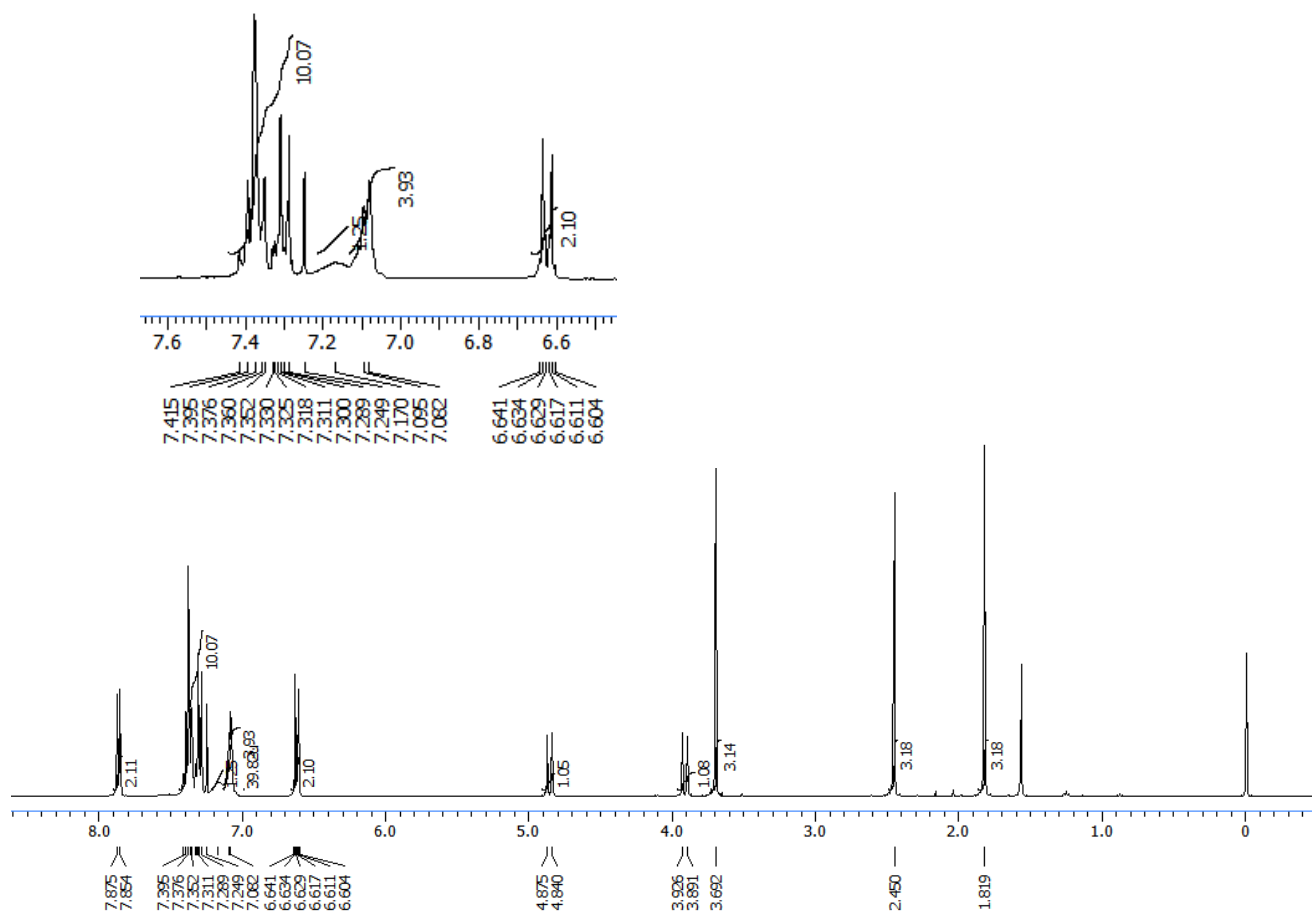

<sup>13</sup>C NMR spectrum of 3i (100 MHz, CDCl<sub>3</sub>)

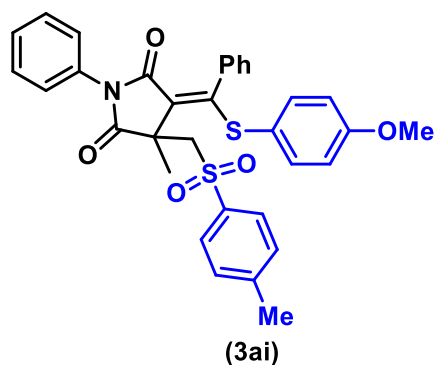

(*E*)-4-(((4-methoxyphenyl)thio)(phenyl)methylene)-3-methyl-1-phenyl-3-(tosylmethyl)pyrrolidine-2,5-dione

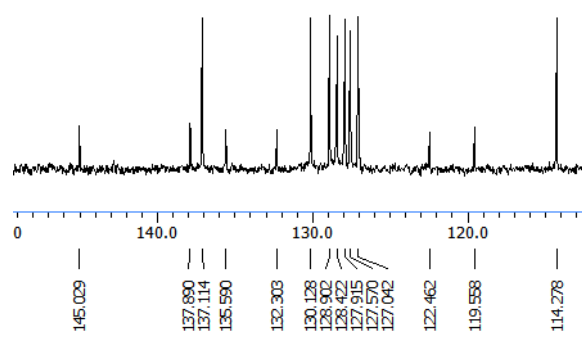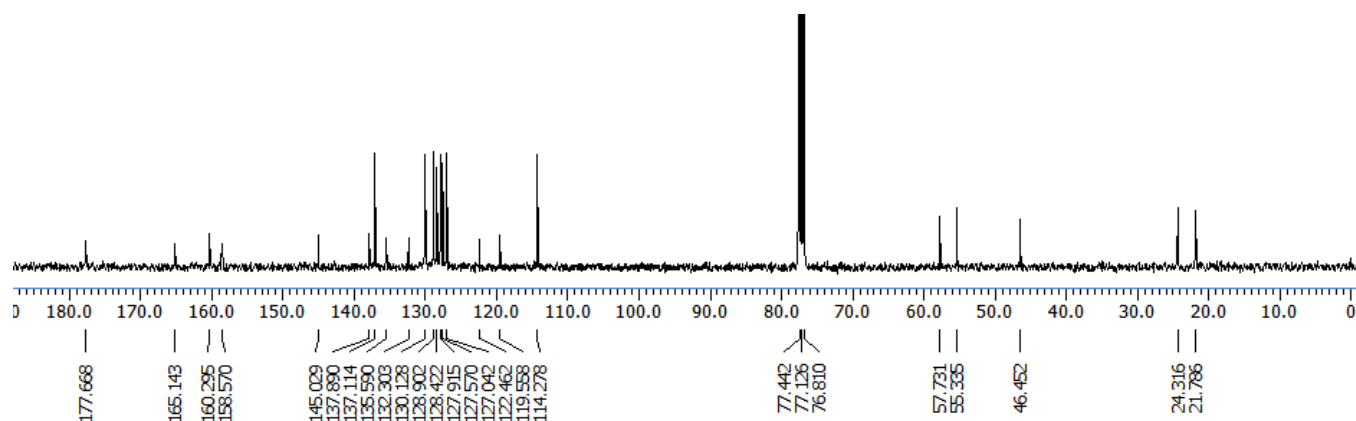

# HRMS Spectrum of 3i

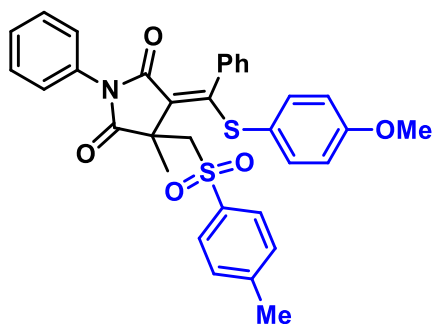

(3ai)

(*E*)-4-(((4-methoxyphenyl)thio)(phenyl)methylene)-3-methyl-1-phenyl-3-(tosylmethyl)pyrrolidine-2,5-dione

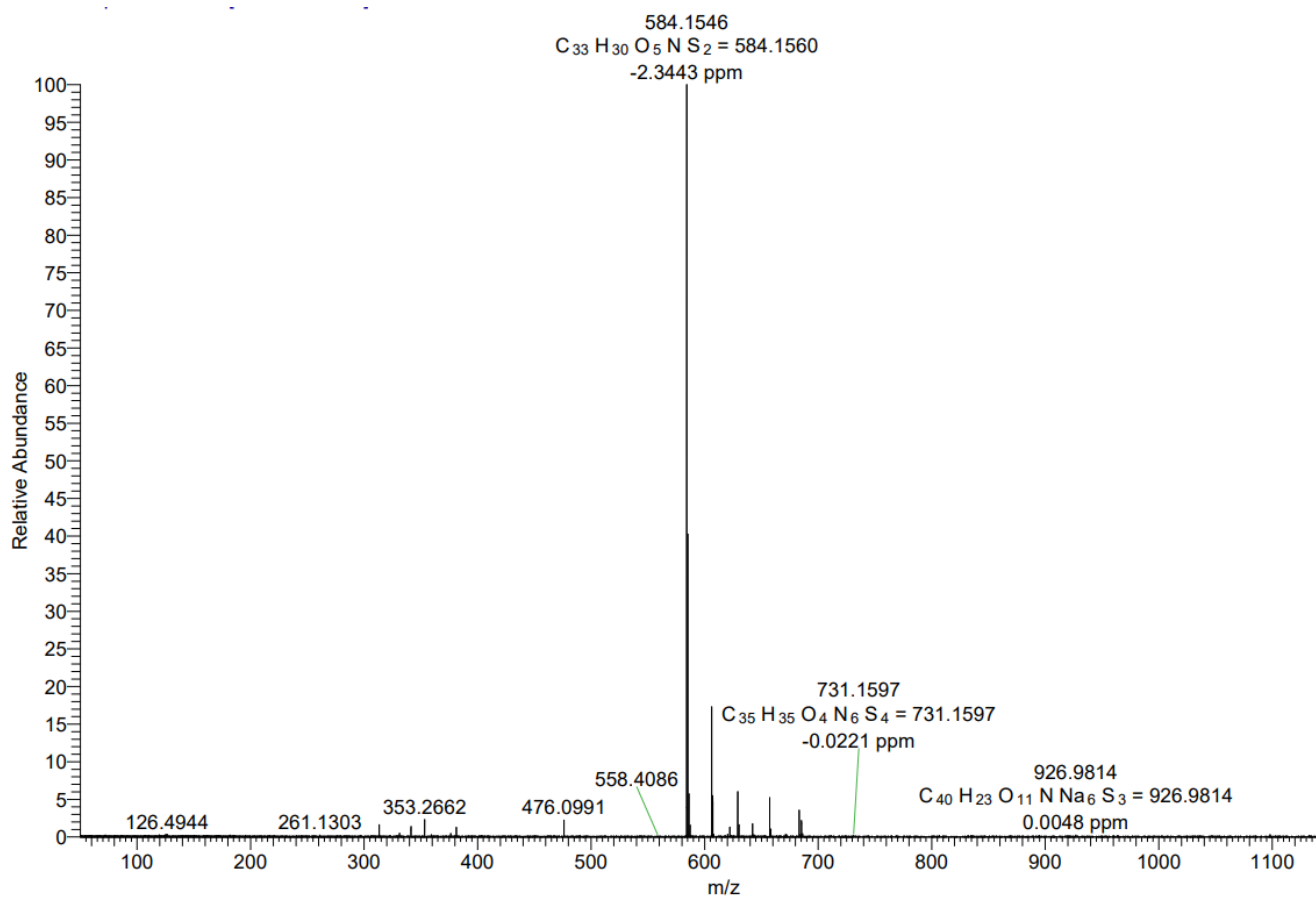



<sup>13</sup>C NMR spectrum of 3ba (100 MHz, CDCl<sub>3</sub>)

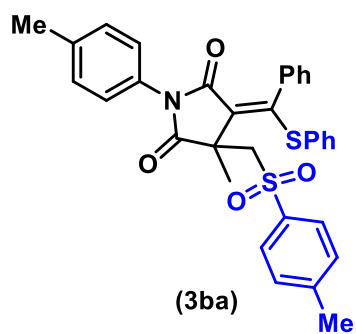

*(E)*-3-methyl-4-(phenyl(phenylthio)methylene)-1-(*p*-tolyl)-3-(tosylmethyl)pyrrolidine-2,5 dione

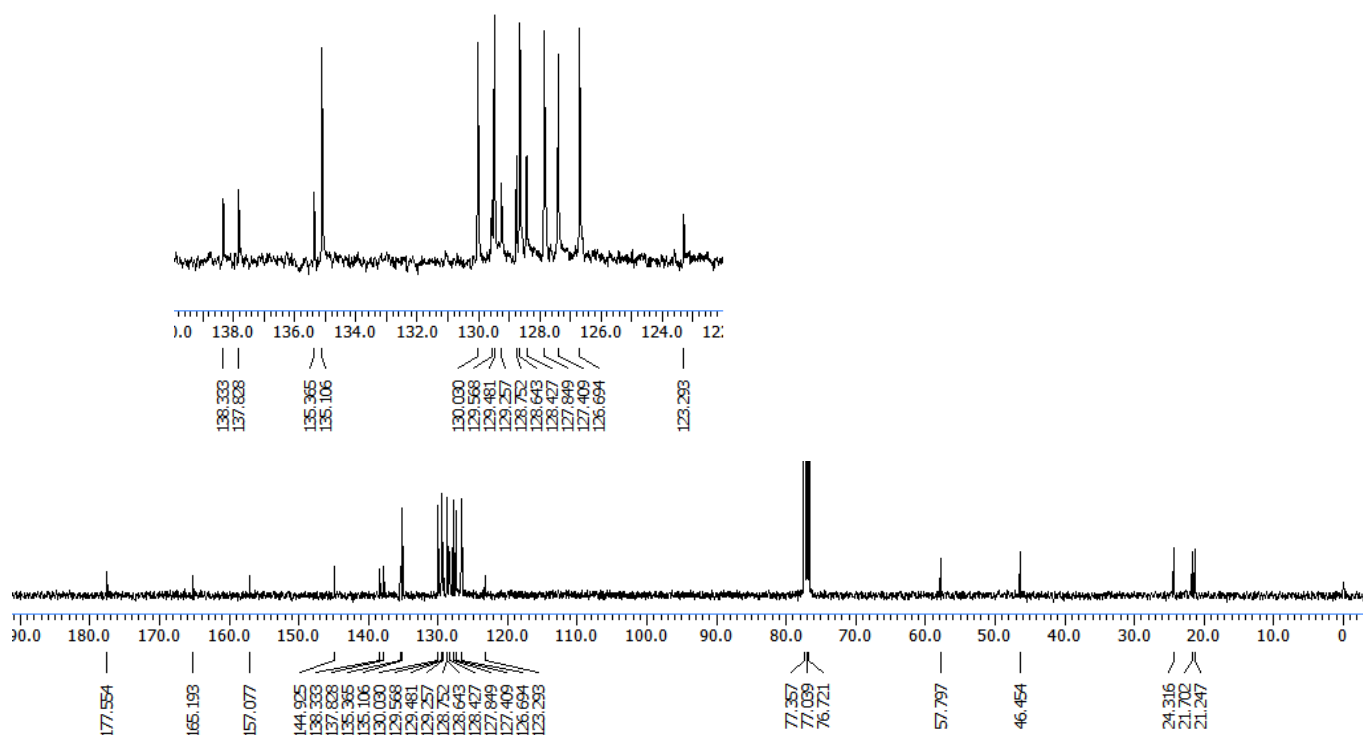

### HRMS Spectrum of 3ba



*(E)*-3-methyl-4-(phenyl(phenylthio)methylene)-1-(*p*-tolyl)-3-(tosylmethyl)pyrrolidine-2,5 dione

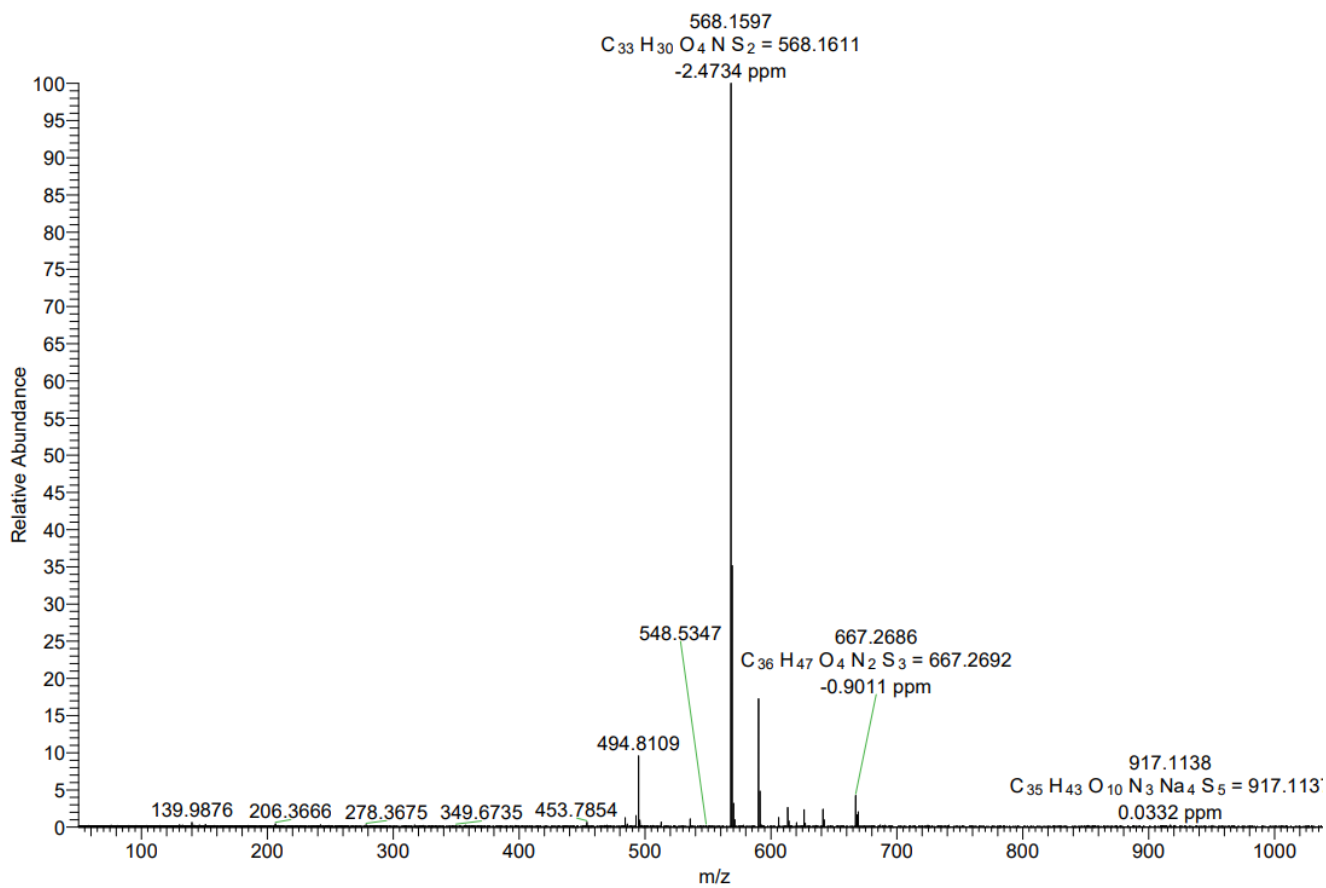

**<sup>1</sup>H NMR spectrum of 3bb (400 MHz, CDCl<sub>3</sub>)**

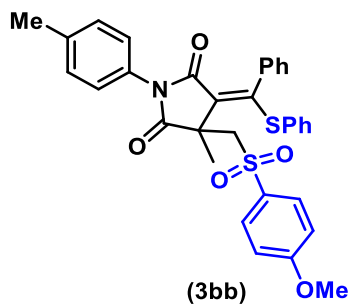

**(E)-3-(((4-methoxyphenyl)sulfonyl)methyl)-3-methyl-4-(phenyl(phenylthio)methylene)-1-(*p*-tolyl)pyrrolidine-2,5-dione**

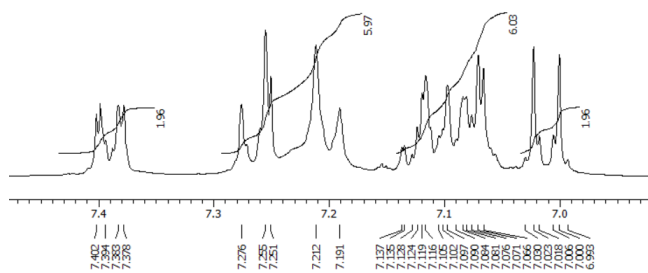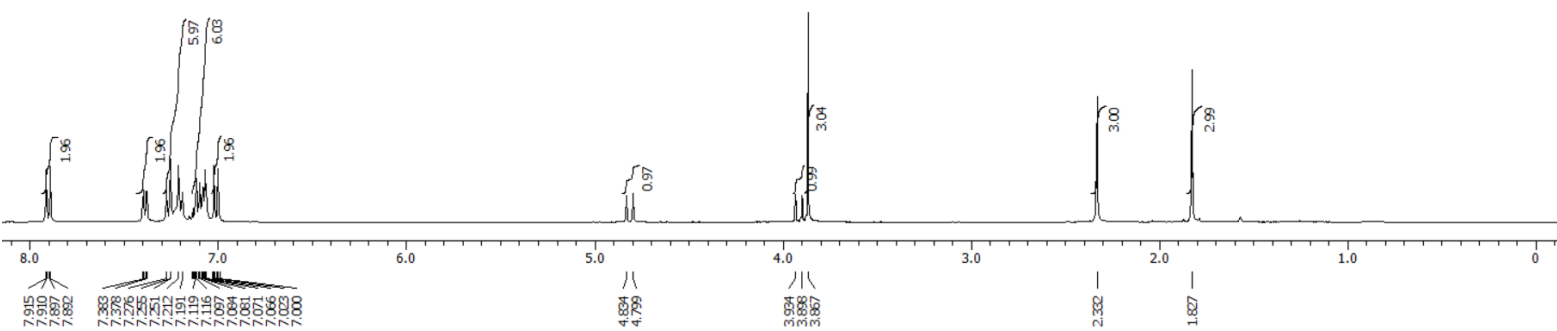

<sup>13</sup>C NMR spectrum of 3bb (100 MHz, CDCl<sub>3</sub>)

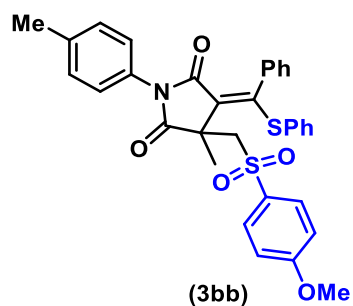

(*E*)-3-(((4-methoxyphenyl)sulfonyl)methyl)-3-methyl-4-(phenyl(phenylthio)methylene)-1-(*p*-tolyl)pyrrolidine-2,5-dione

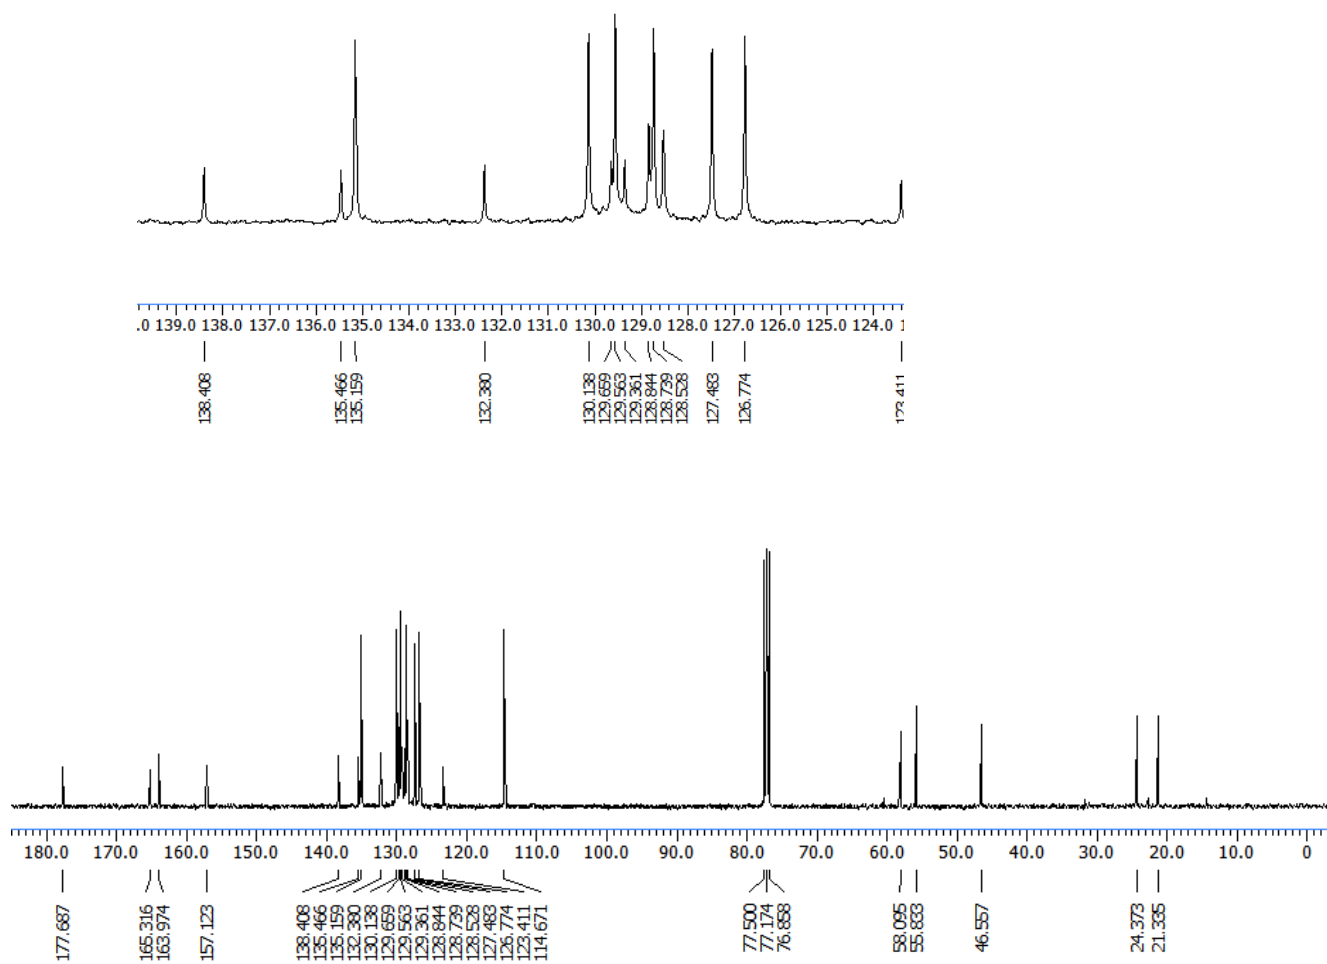



## HRMS spectrum of 3bb

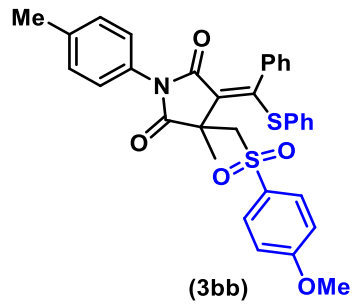

(E)-3-(((4-methoxyphenyl)sulfonyl)methyl)-3-methyl-4-(phenyl(phenylthio)methylene)-1-(p-tolyl)pyrrolidine-2,5-dione

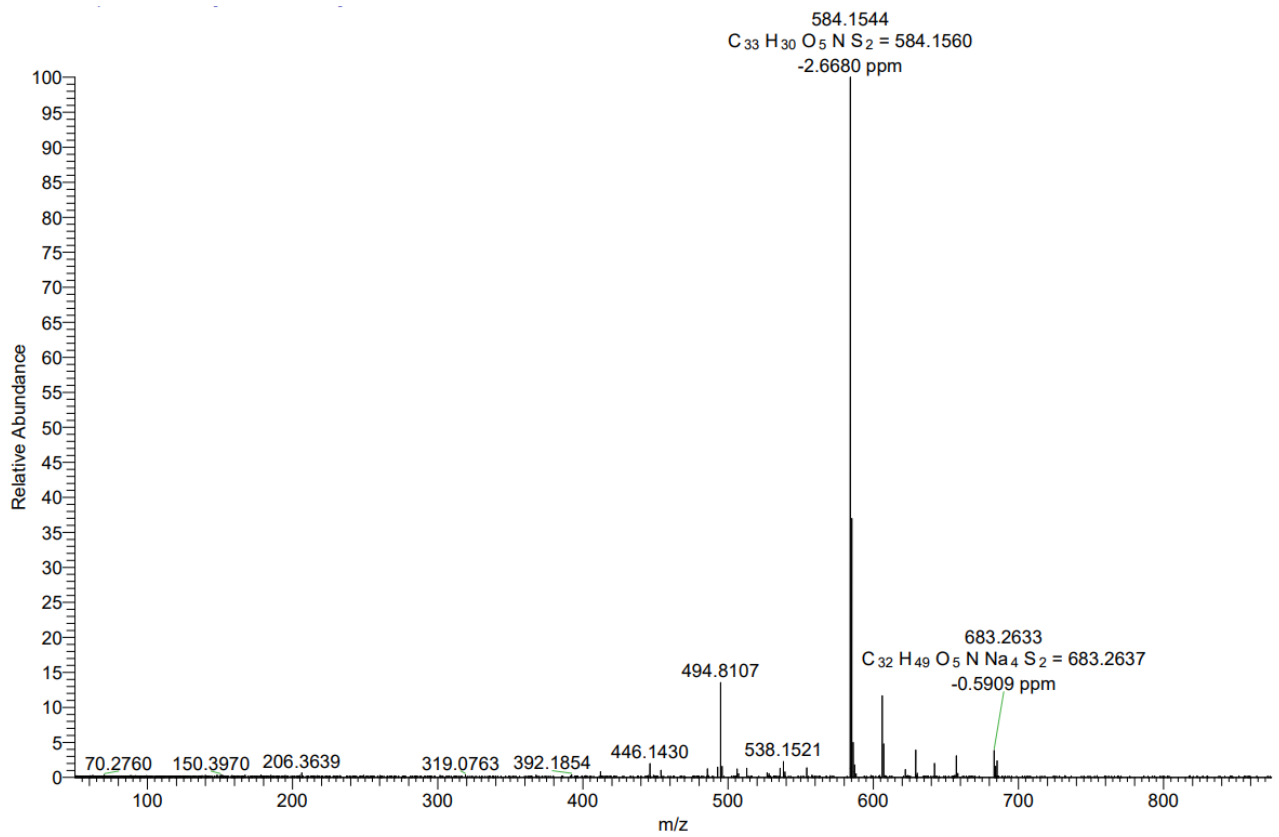

<sup>1</sup>H NMR spectrum of 3bc (400 MHz, CDCl<sub>3</sub>)

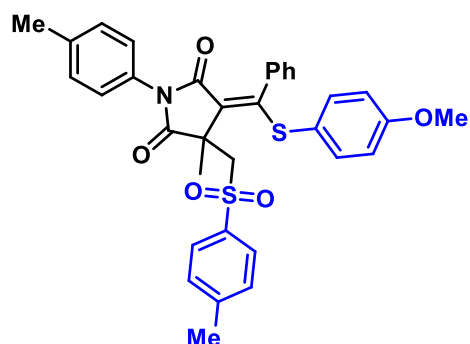

(3bc)

(*E*)-4-(((4-methoxyphenyl)thio)(phenyl)methylene)-3-methyl-1-(*p*-tolyl)-3-(tosylmethyl)pyrrolidine-2,5-dione

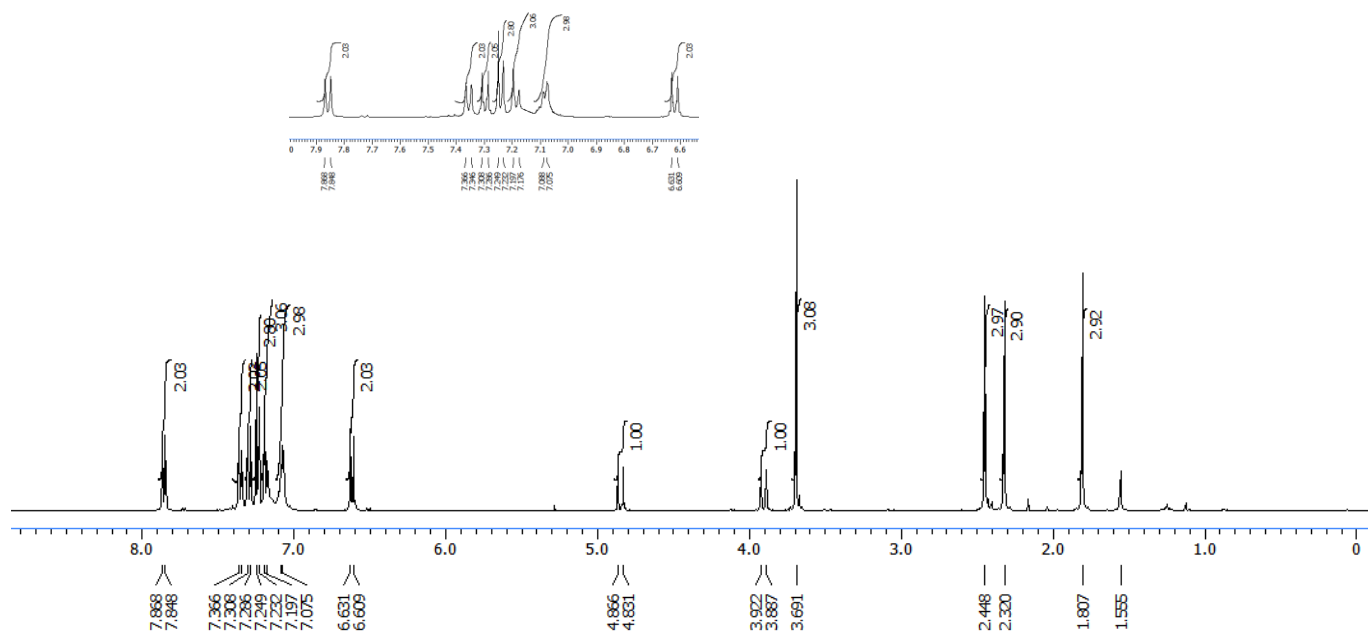

**<sup>13</sup>CNMR spectrum of 3bc (100 MHz, CDCl<sub>3</sub>)**

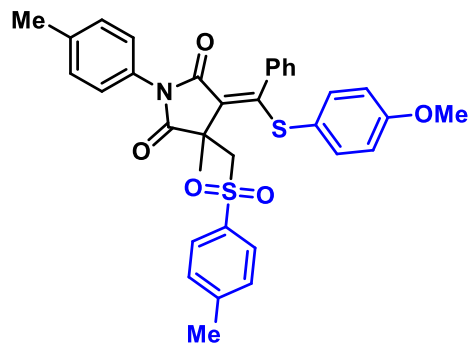

**(3bc)**

**(E)-4-(((4-methoxyphenyl)thio)(phenyl)methylene)-3-methyl-1-(p-tolyl)-3-(tosylmethyl)pyrrolidine-2,5-dione**

SMP-17

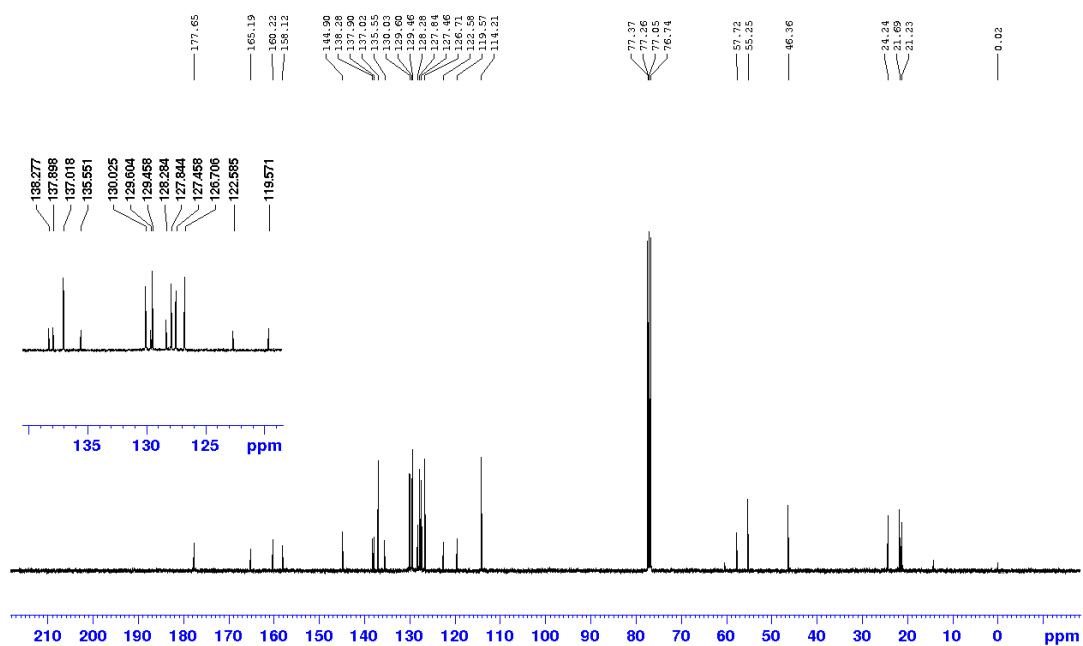

## HRMS spectrum of 3bc

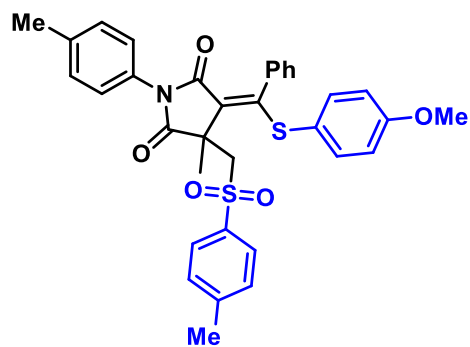

(3bc)

(E)-4-(((4-methoxyphenyl)thio)(phenyl)methylene)-3-methyl-1-(p-tolyl)-3-(tosylmethyl)pyrrolidine-2,5-dione

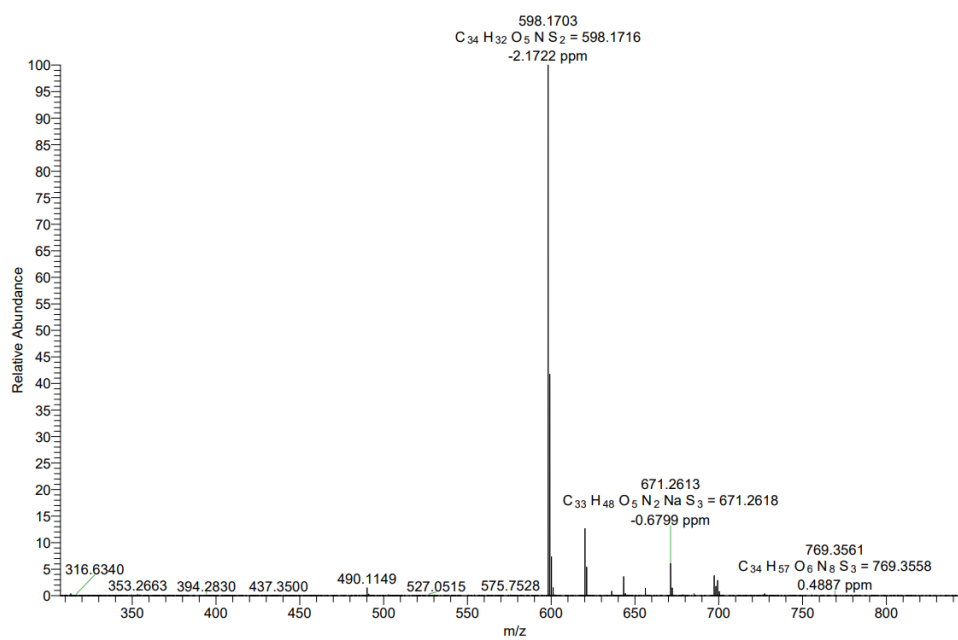

<sup>1</sup>H NMR spectrum of 3bd (400 MHz, CDCl<sub>3</sub>)

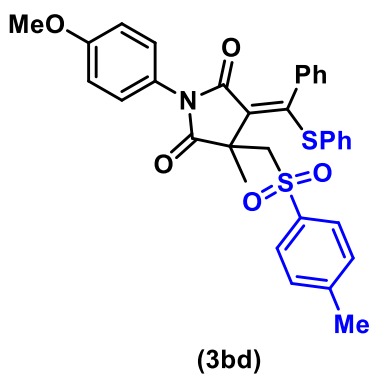

(*E*)-1-(4-methoxyphenyl)-3-methyl-4-(phenyl(phenylthio)methylene)-3-(tosylmethyl)pyrrolidine-2,5-dione

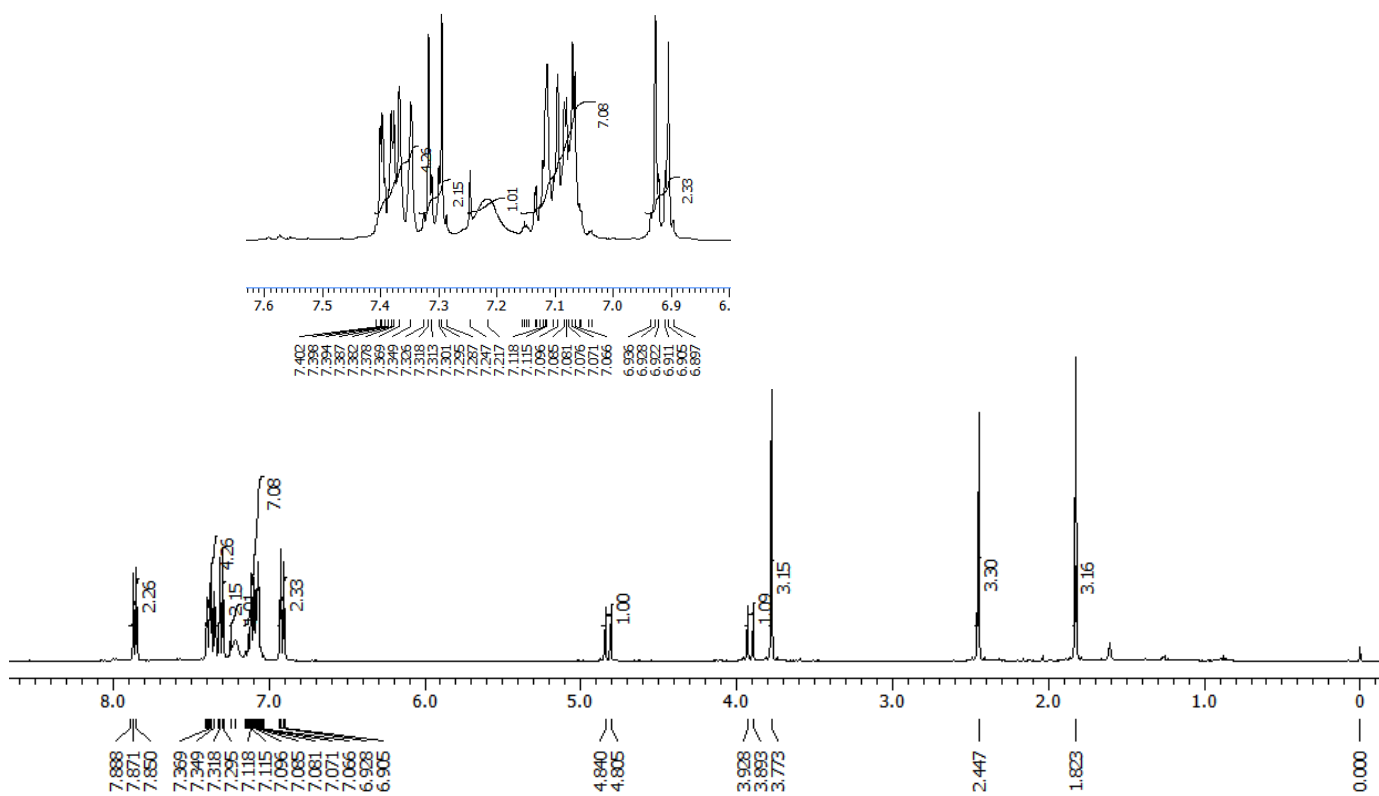

<sup>13</sup>C NMR spectrum of 3bd (100 MHz, CDCl<sub>3</sub>)

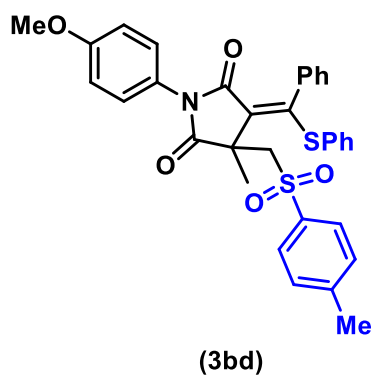

*(E)*-1-(4-methoxyphenyl)-3-methyl-4-(phenyl(phenylthio)methylene)-3-(tosylmethyl)pyrrolidine-2,5-dione

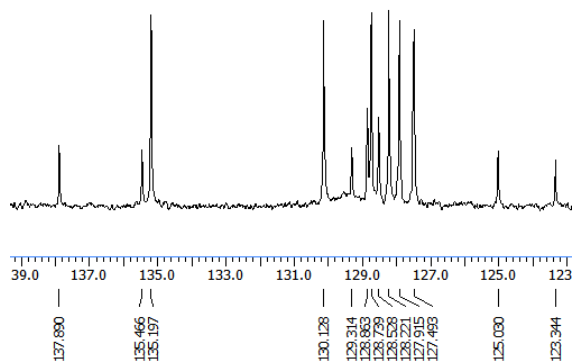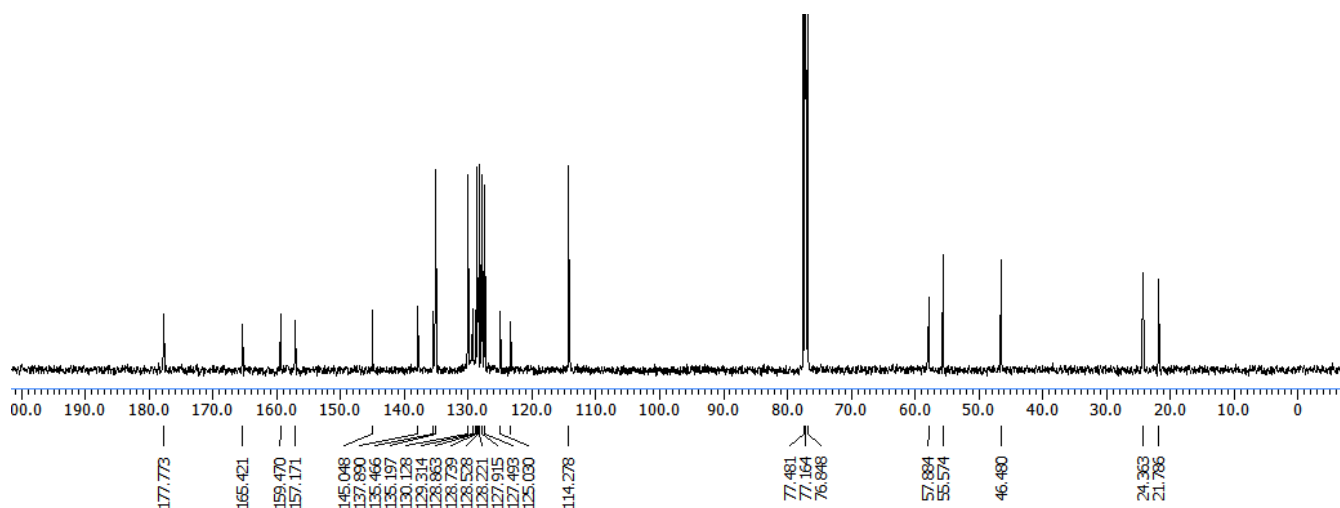

### HRMS spectrum of 3bd

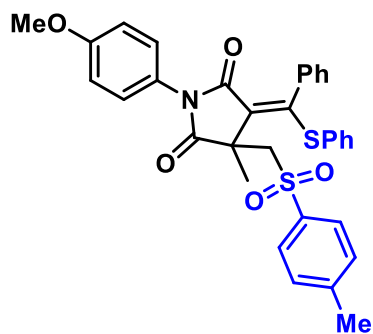

(3bd)

*(E)*-1-(4-methoxyphenyl)-3-methyl-4-(phenyl(phenylthio)methylene)-3-(tosylmethyl)pyrrolidine-2,5-dione

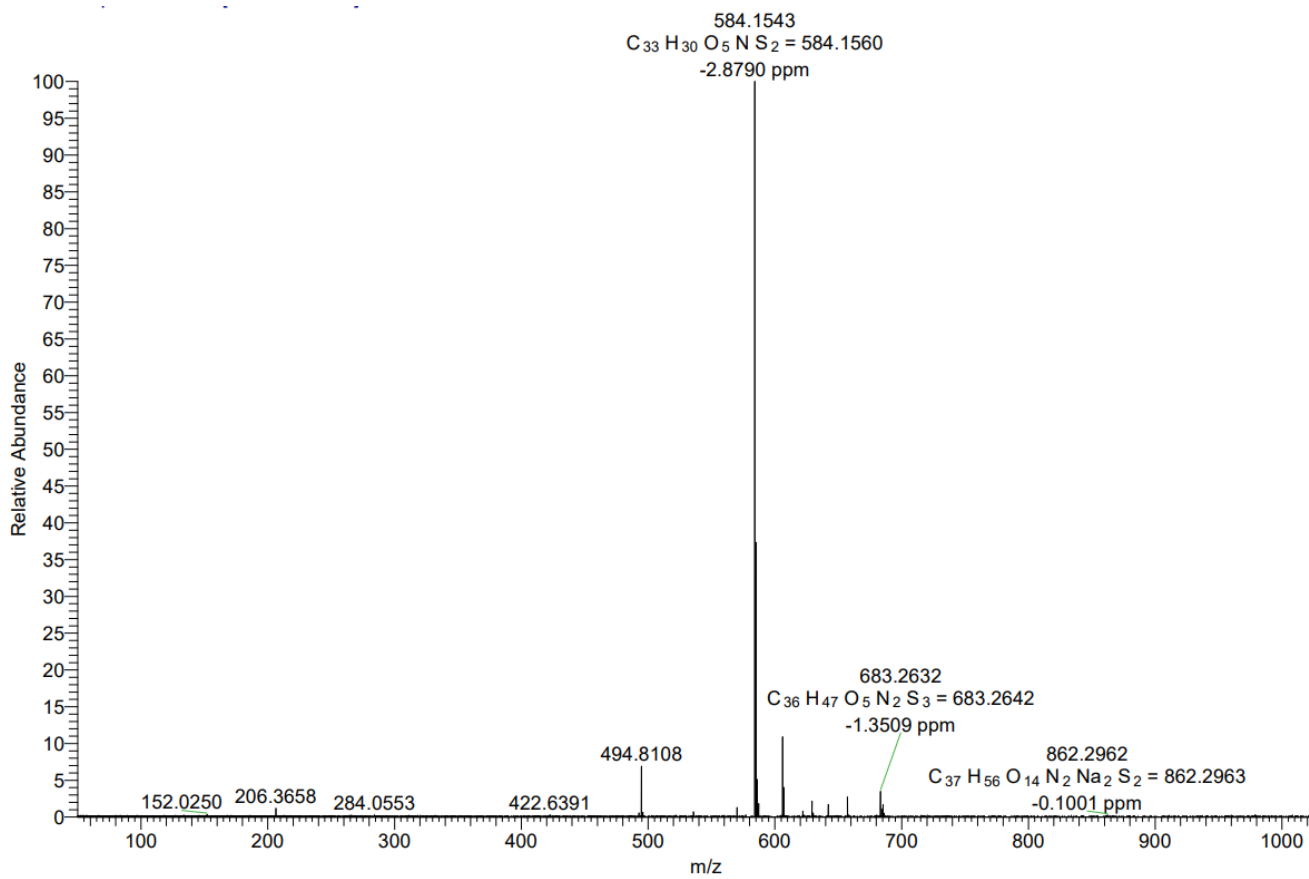

<sup>1</sup>H NMR spectrum of 3be (400 MHz, CDCl<sub>3</sub>)

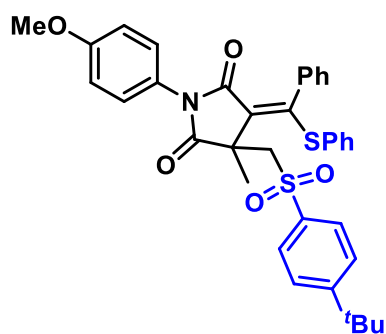

(3be)

(*E*)-3-(((4-(*tert*-butyl)phenyl)sulfonyl)methyl)-1-(4-methoxyphenyl)-3-methyl-4-(phenyl(phenylthio)methylene)pyrrolidine-2,5-dione

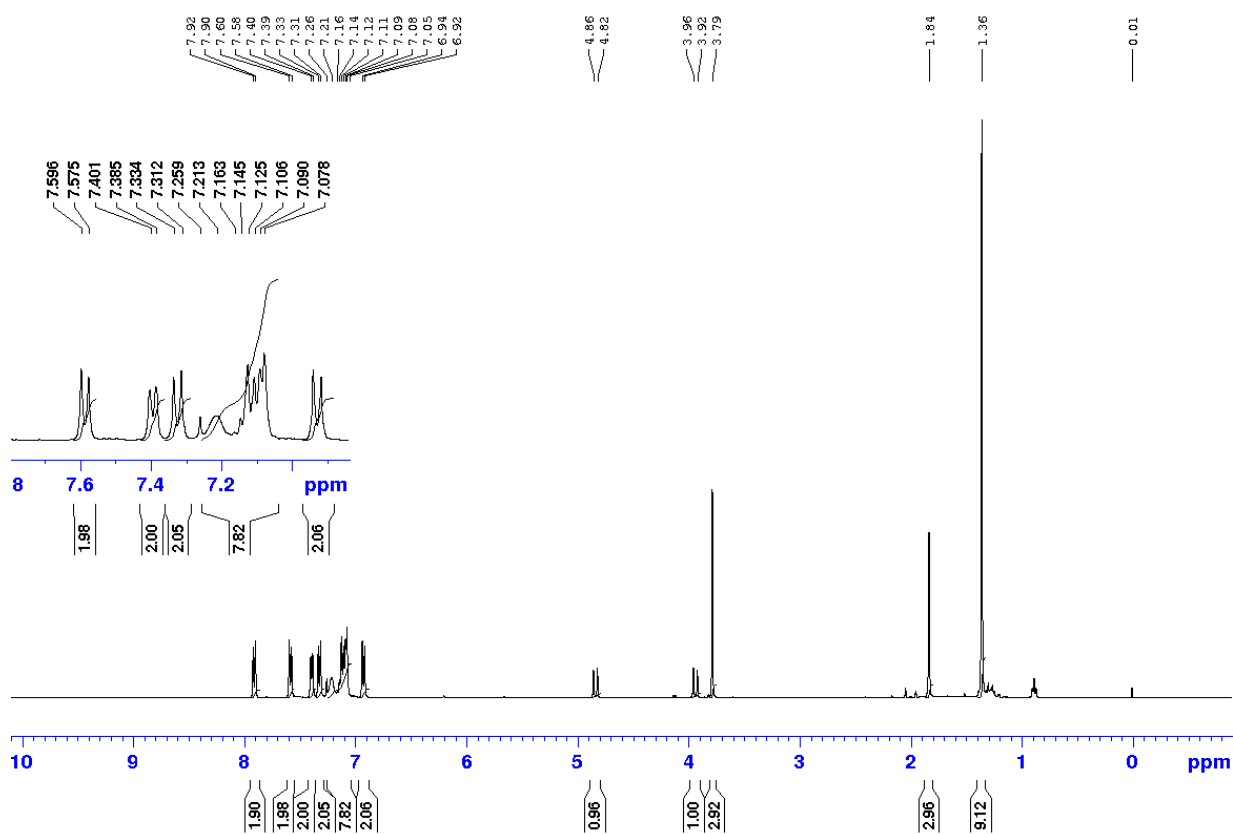



<sup>13</sup>C NMR spectrum of 3be (100 MHz, CDCl<sub>3</sub>)

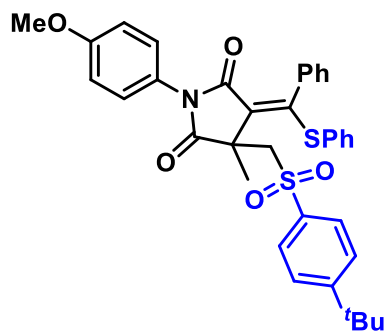

(3be)

(E)-3-(((4-(*tert*-butyl)phenyl)sulfonyl)methyl)-1-(4-methoxyphenyl)-3-methyl-4-(phenyl(phenylthio)methylene)pyrrolidine-2,5-dione

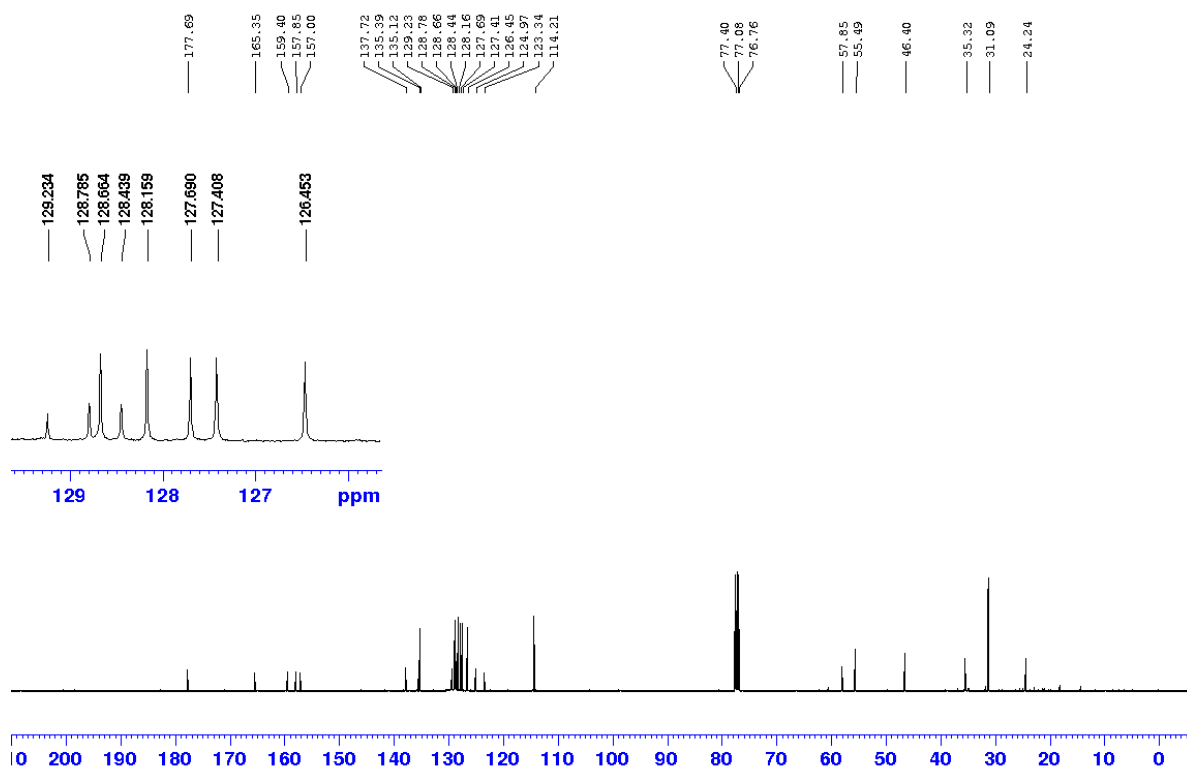

### HRMS spectrum of 3be

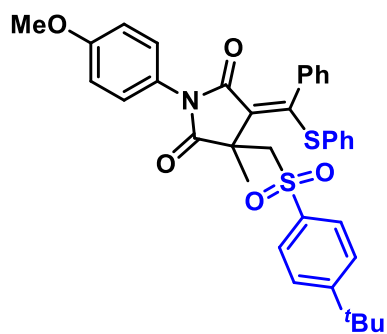

(3be)

(*E*)-3-(((4-(*tert*-butyl)phenyl)sulfonyl)methyl)-1-(4-methoxyphenyl)-3-methyl-4-phenyl(phenylthio)methylene)pyrrolidine-2,5-dione

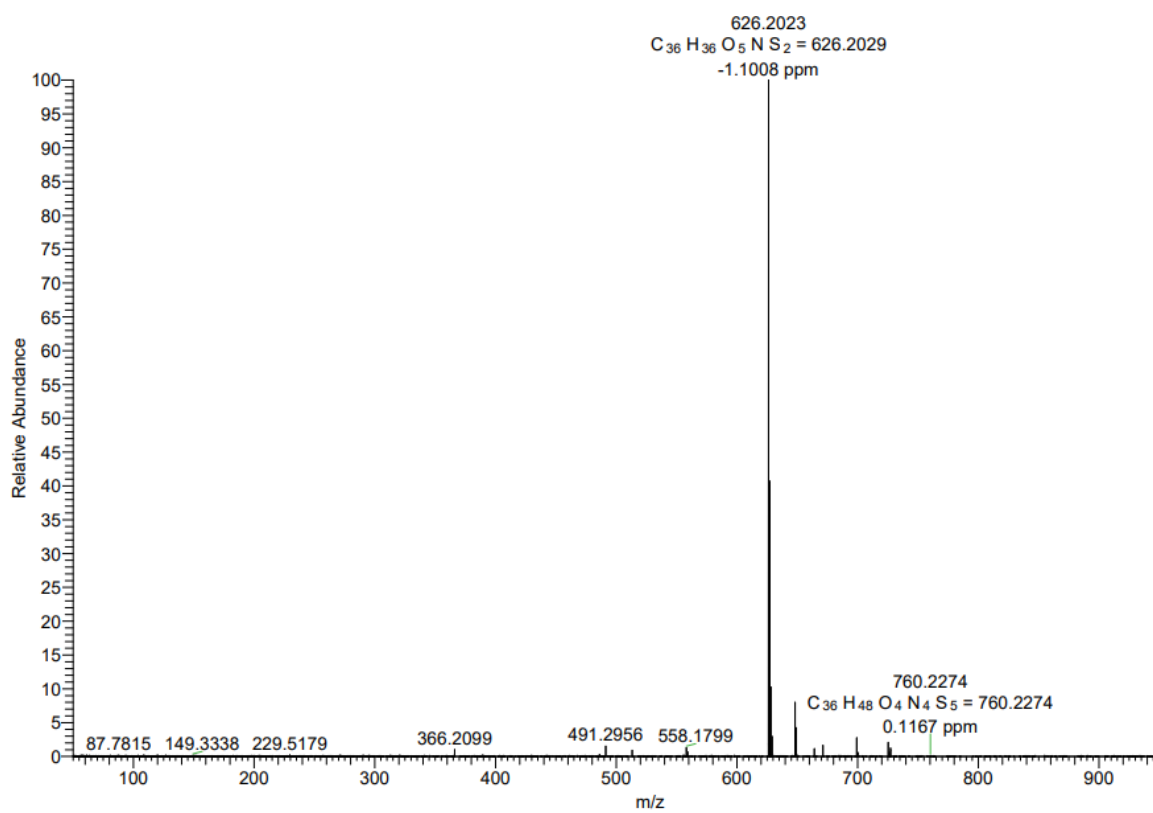

**<sup>1</sup>H NMR spectrum of 3bf (400 MHz, CDCl<sub>3</sub>)**

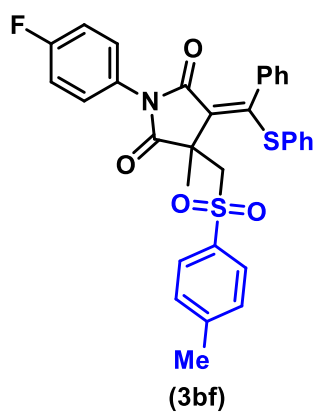

**(E)-1-(4-fluorophenyl)-3-methyl-4-(phenyl(phenylthio)methylene)-3-(tosylmethyl)pyrrolidine-2,5-dione**

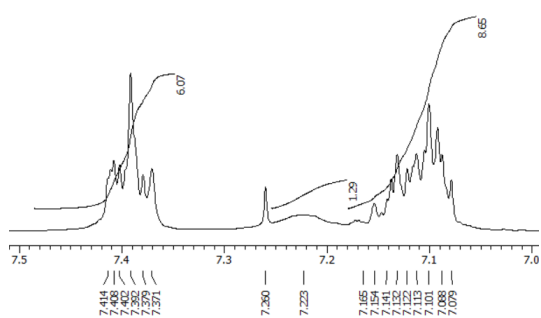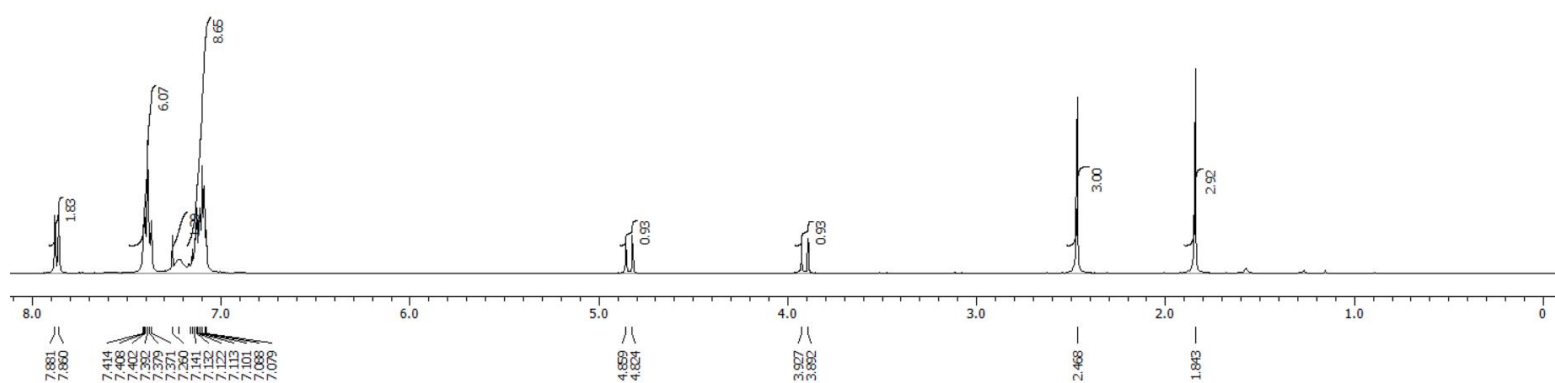

**<sup>13</sup>C NMR spectrum of 3bf (100 MHz, CDCl<sub>3</sub>)**

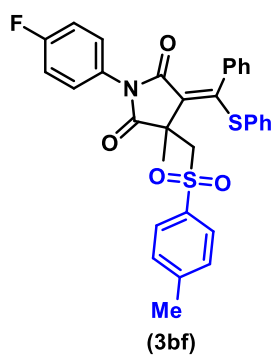

**(E)-1-(4-fluorophenyl)-3-methyl-4-(phenyl(phenylthio)methylene)-3-(tosylmethyl)pyrrolidine-2,5-dione**

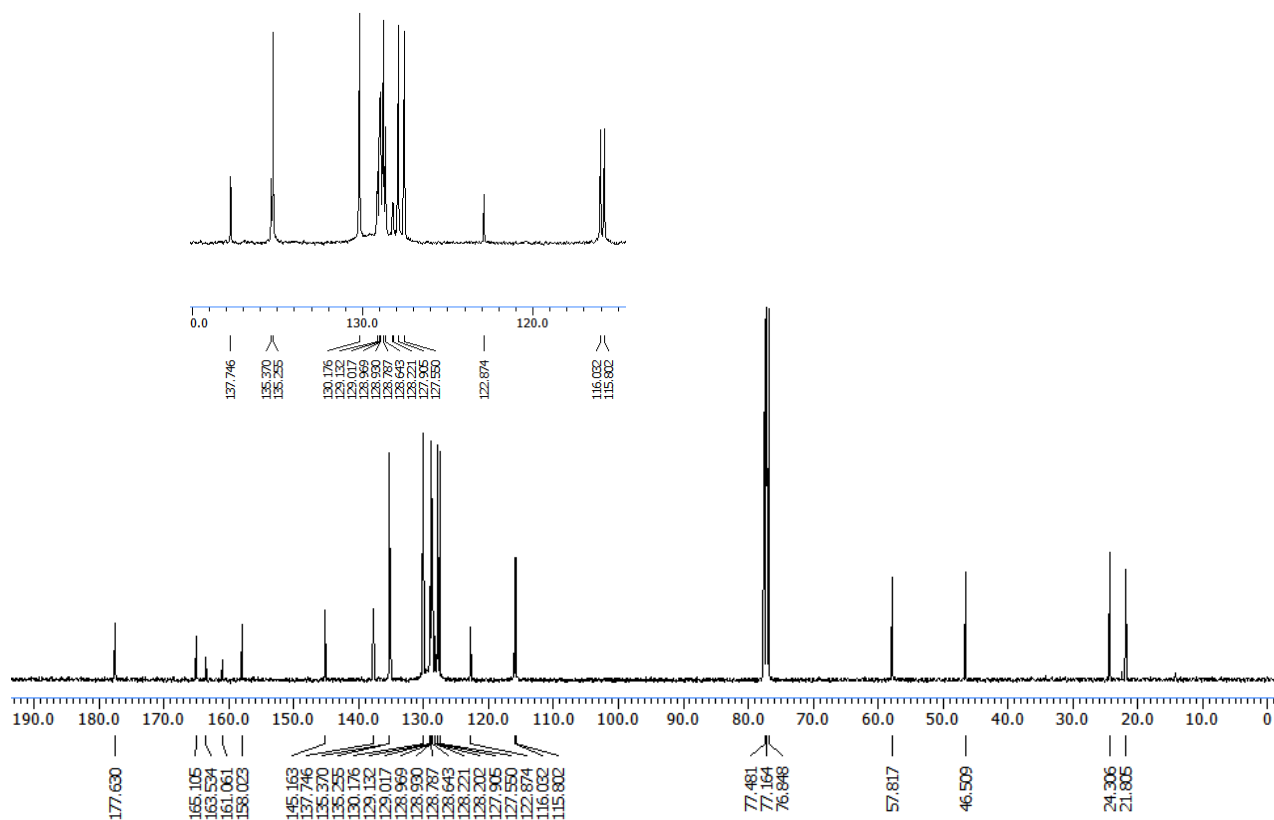

**<sup>13</sup>C NMR spectrum of 3bf (376 MHz, CDCl<sub>3</sub>)**



(*E*)-1-(4-fluorophenyl)-3-methyl-4-(phenyl(phenylthio)methylene)-3-(tosylmethyl)pyrrolidine-2,5-dione

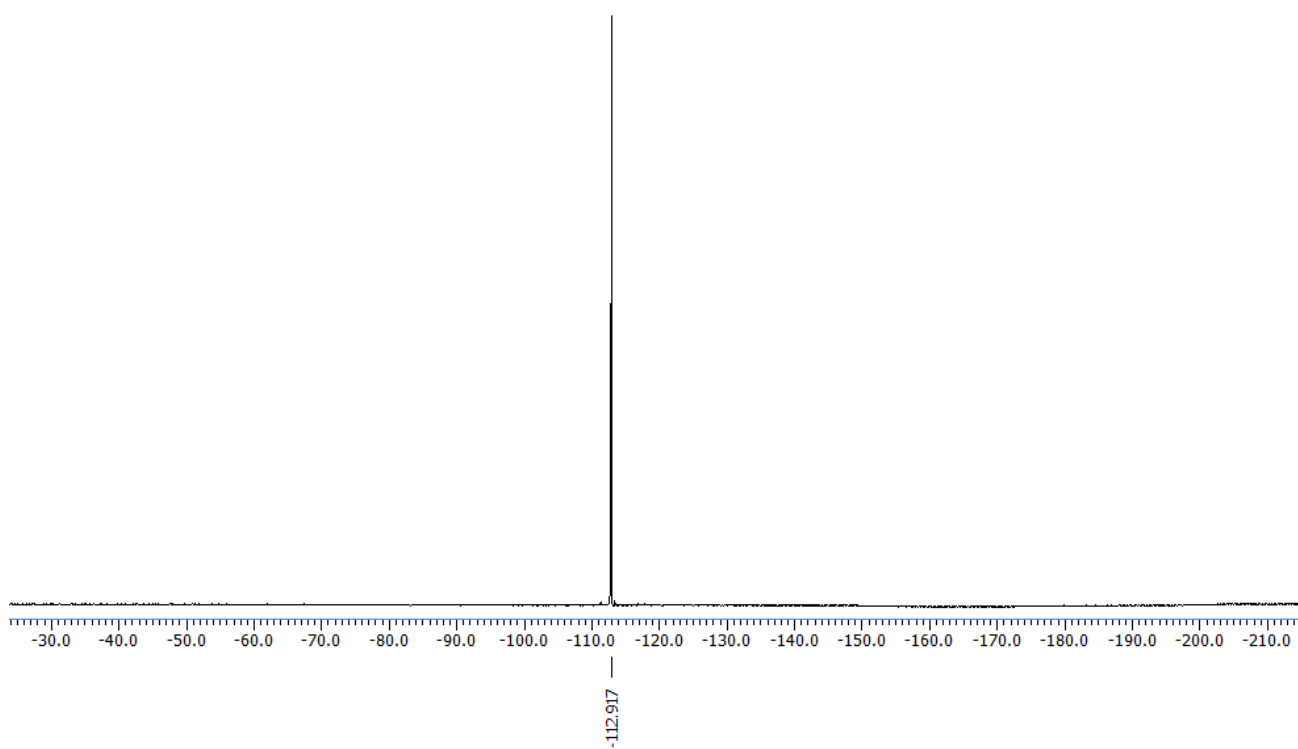

HRMS spectrum of 3bf

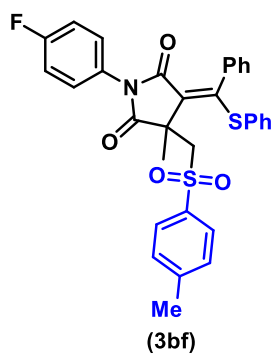

(E)-1-(4-fluorophenyl)-3-methyl-4-(phenyl(phenylthio)methylene)-3-(tosylmethyl)pyrrolidine-2,5-dione

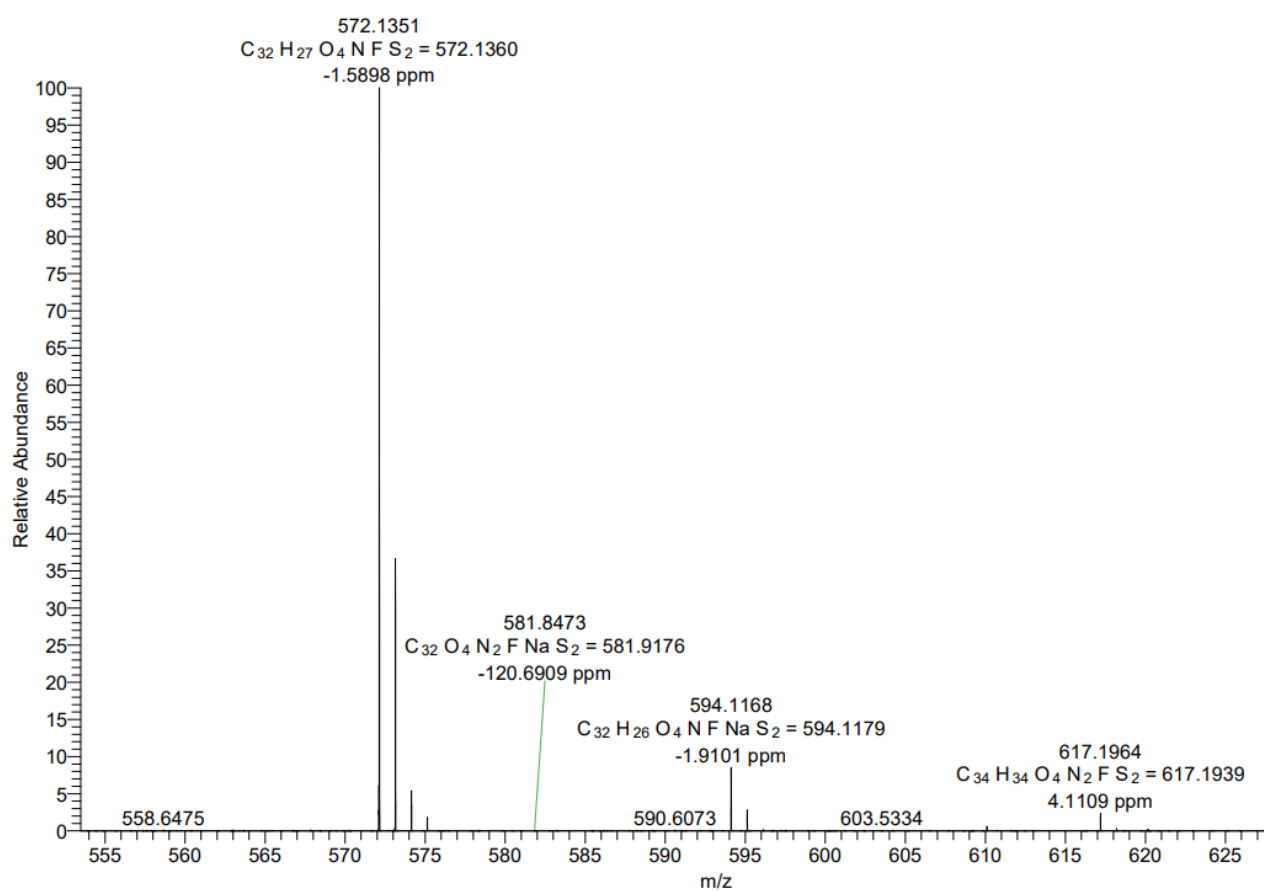

<sup>1</sup>H NMR spectrum of 3bg (400 MHz, CDCl<sub>3</sub>)

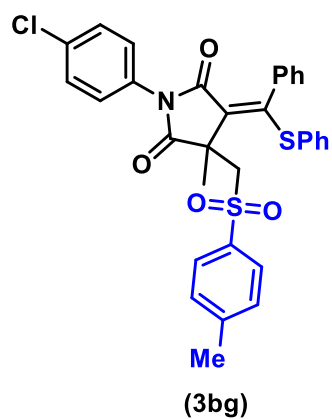

**(E)-1-(4-chlorophenyl)-3-methyl-4-(phenyl(phenylthio)methylene)-3-(tosylmethyl)pyrrolidine-2,5-dione**

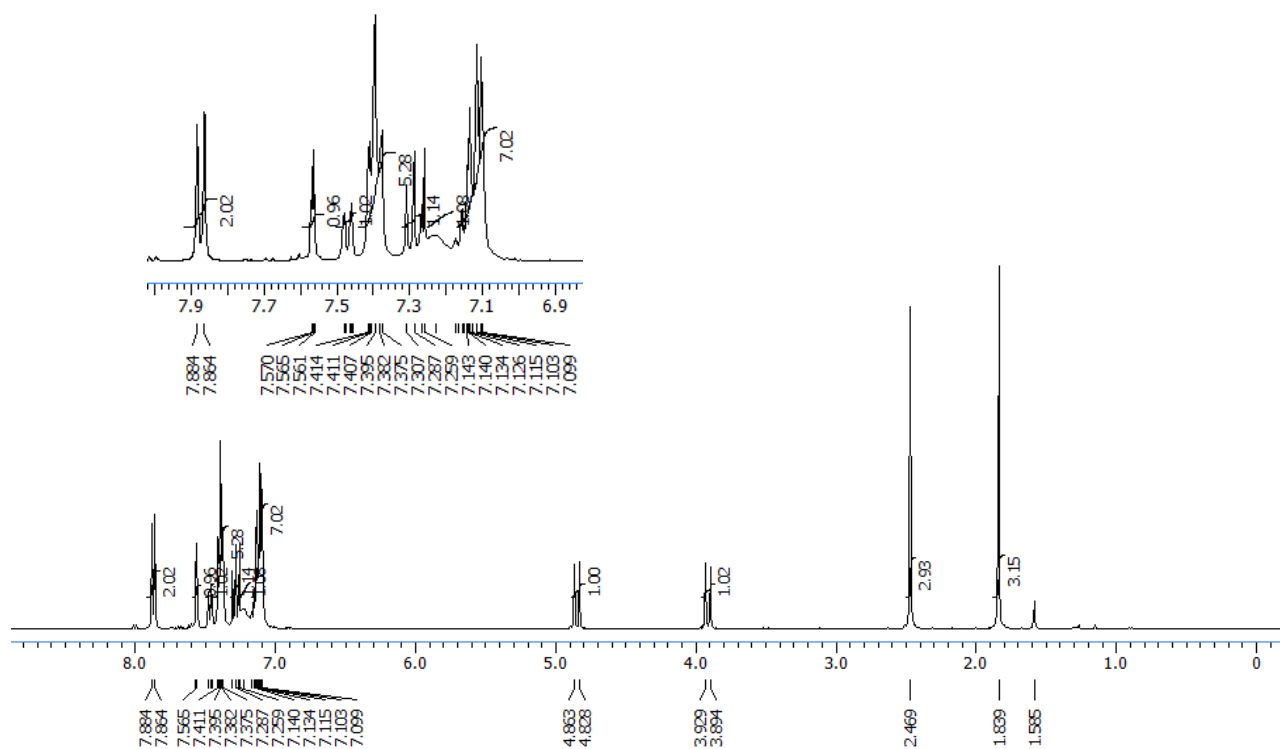

**<sup>13</sup>C NMR spectrum of 3bg (100 MHz, CDCl<sub>3</sub>)**

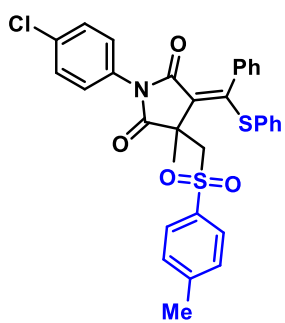

(3bg)

(E)-1-(4-chlorophenyl)-3-methyl-4-(phenyl(phenylthio)methylene)-3-(tosylmethyl)pyrrolidine-2,5-dione

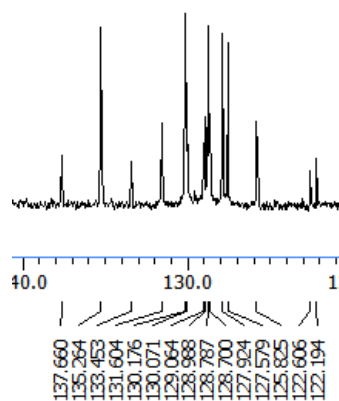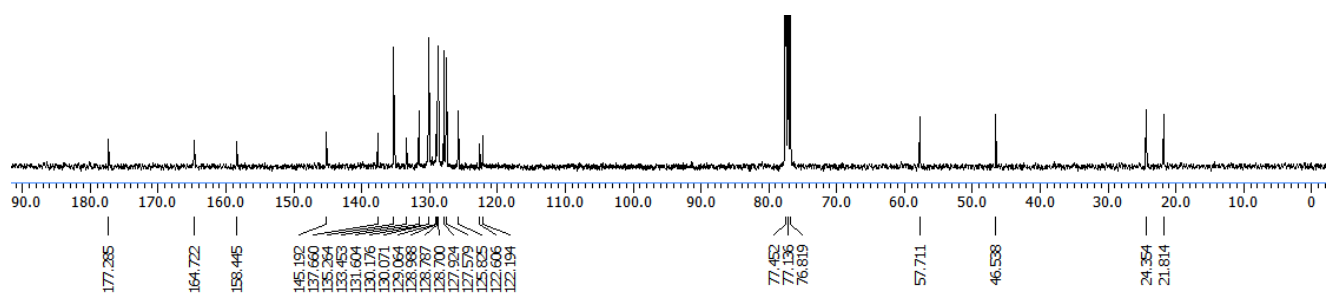

HRMS spectrum of 3bg



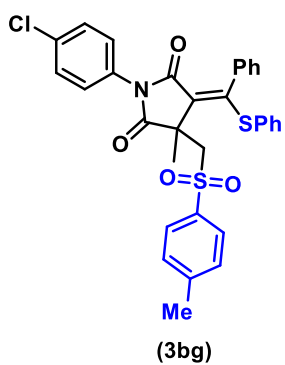

**(E)-1-(4-chlorophenyl)-3-methyl-4-(phenyl(phenylthio)methylene)-3-(tosylmethyl)pyrrolidine-2,5-dione**

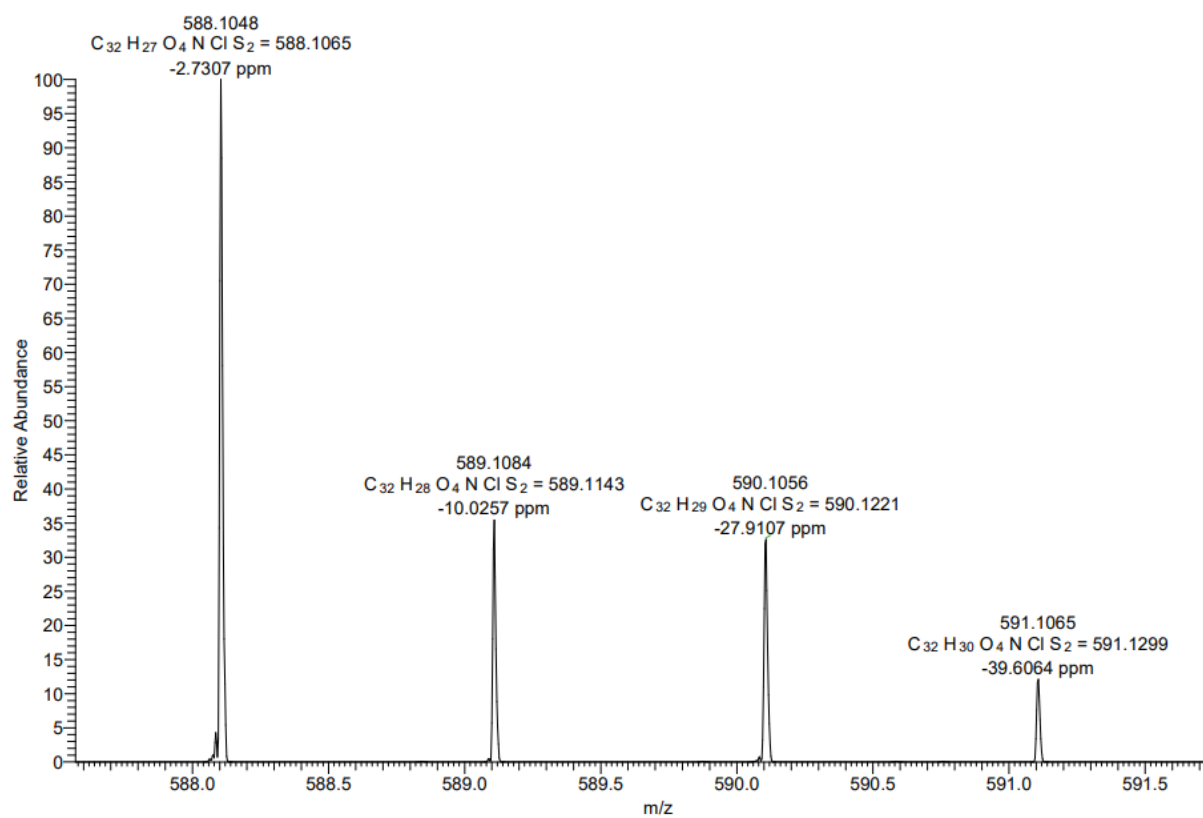

<sup>1</sup>H NMR spectrum of 3bh (400 MHz, CDCl<sub>3</sub>)

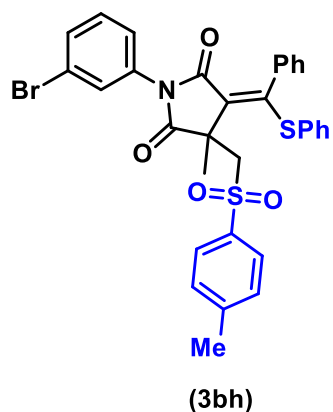

(*E*)-1-(3-bromophenyl)-3-methyl-4-(phenyl(phenylthio)methylene)-3-(tosylmethyl)pyrrolidine-2,5-dione

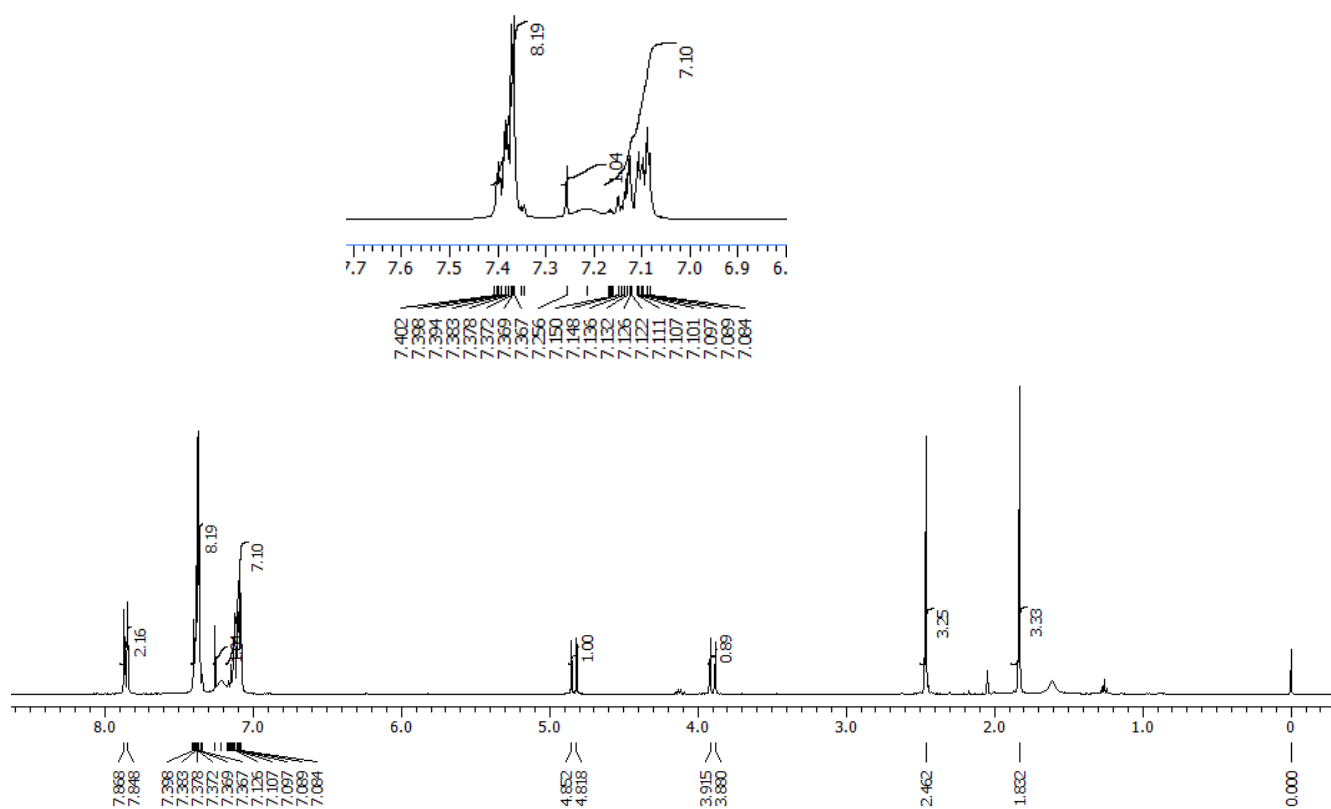

<sup>13</sup>C NMR spectrum of 3bh (100 MHz, CDCl<sub>3</sub>)

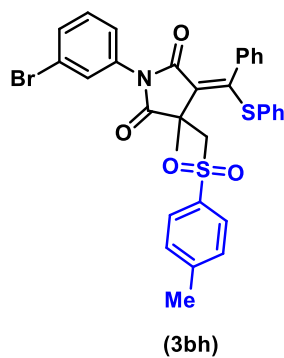

(E)-1-(3-bromophenyl)-3-methyl-4-(phenyl(phenylthio)methylene)-3-(tosylmethyl)pyrrolidine-2,5-dione

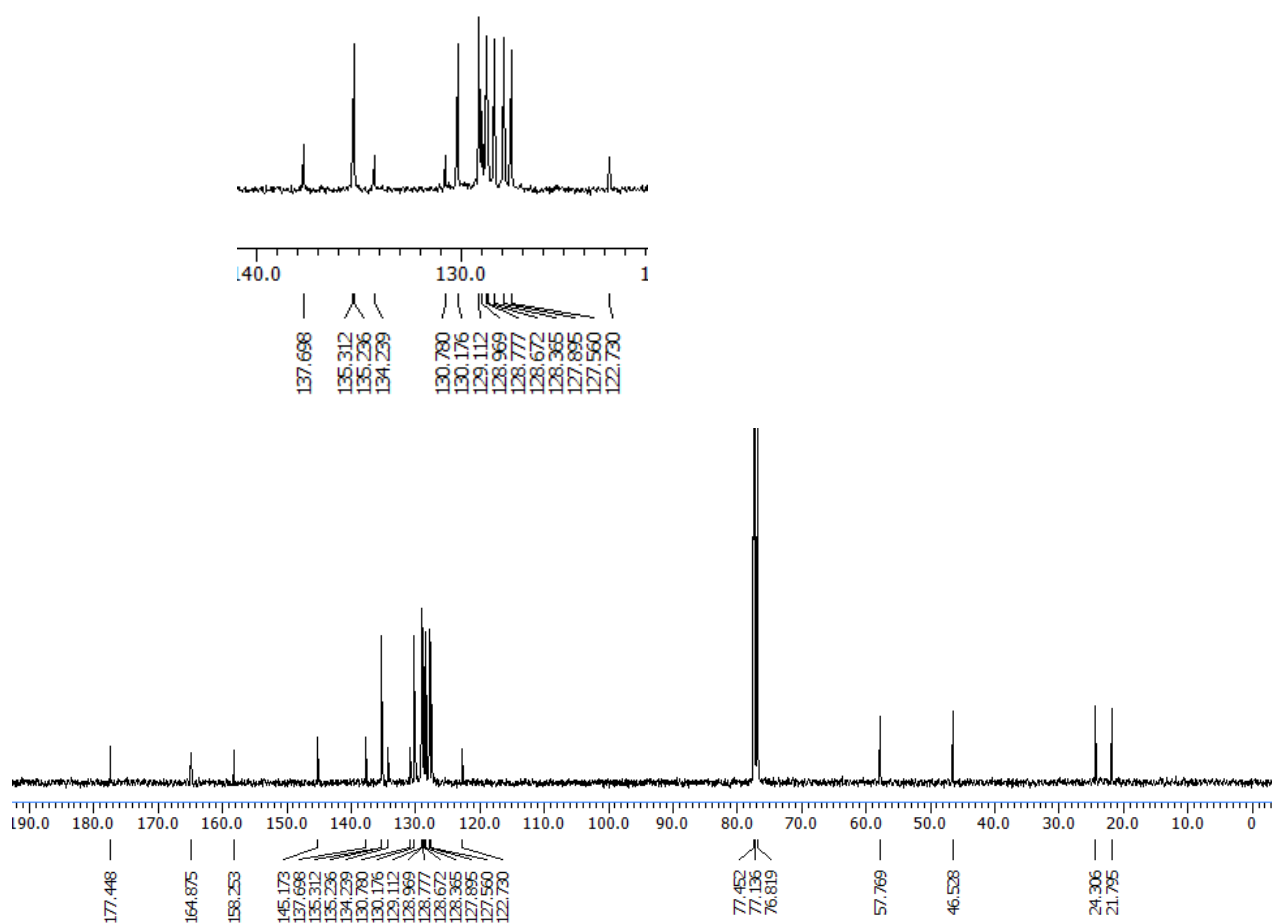

# HRMS spectrum of 3bh

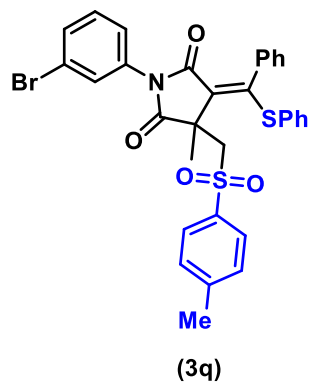

*(E)*-1-(3-bromophenyl)-3-methyl-4-(phenyl(phenylthio)methylene)-3-(tosylmethyl)pyrrolidine-2,5-dione

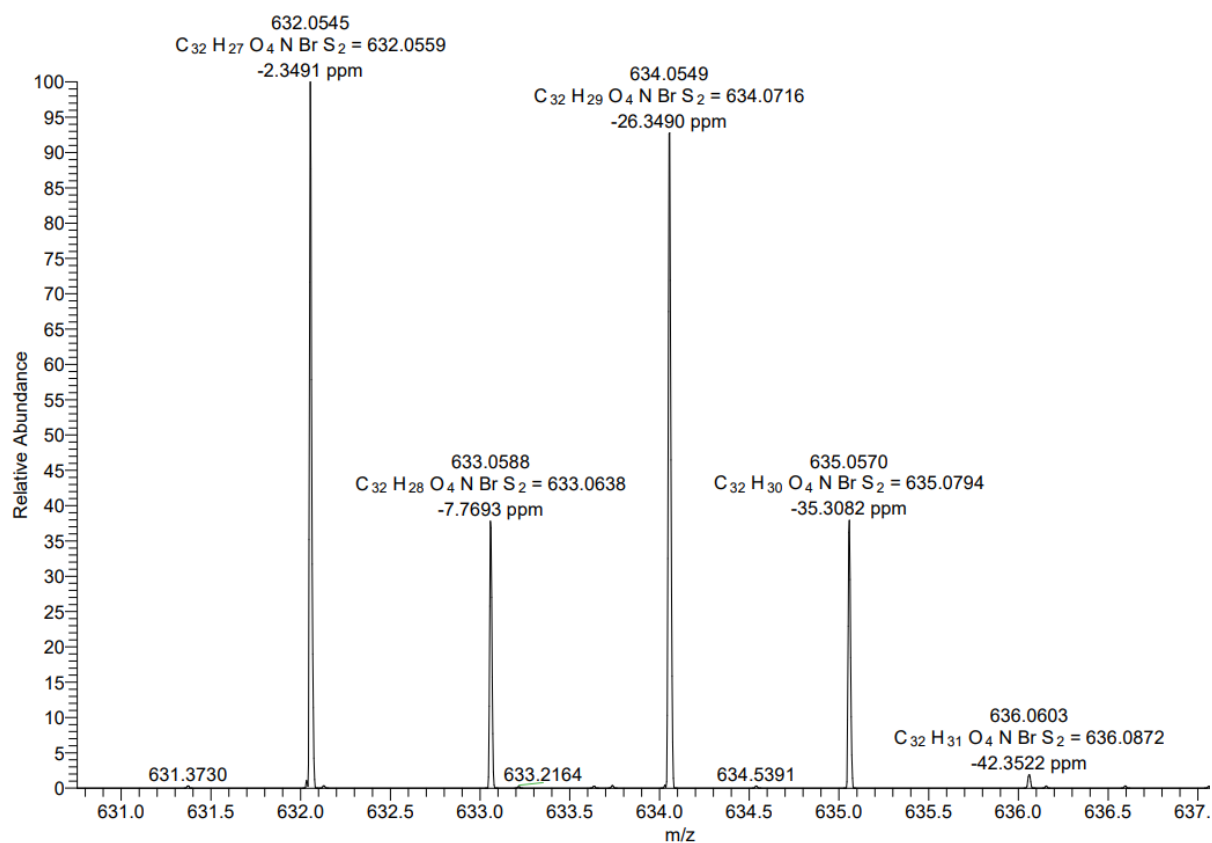

<sup>1</sup>H NMR spectrum of 3bi (400 MHz, CDCl<sub>3</sub>)

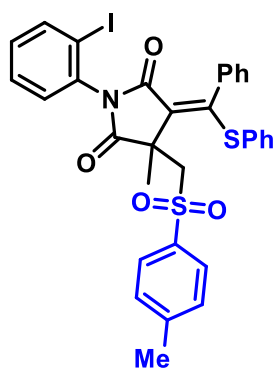

(3bi)

(E)-1-(2-iodophenyl)-3-methyl-4-(phenyl(phenylthio)methylene)-3-(tosylmethyl)pyrrolidine-2,5-dione

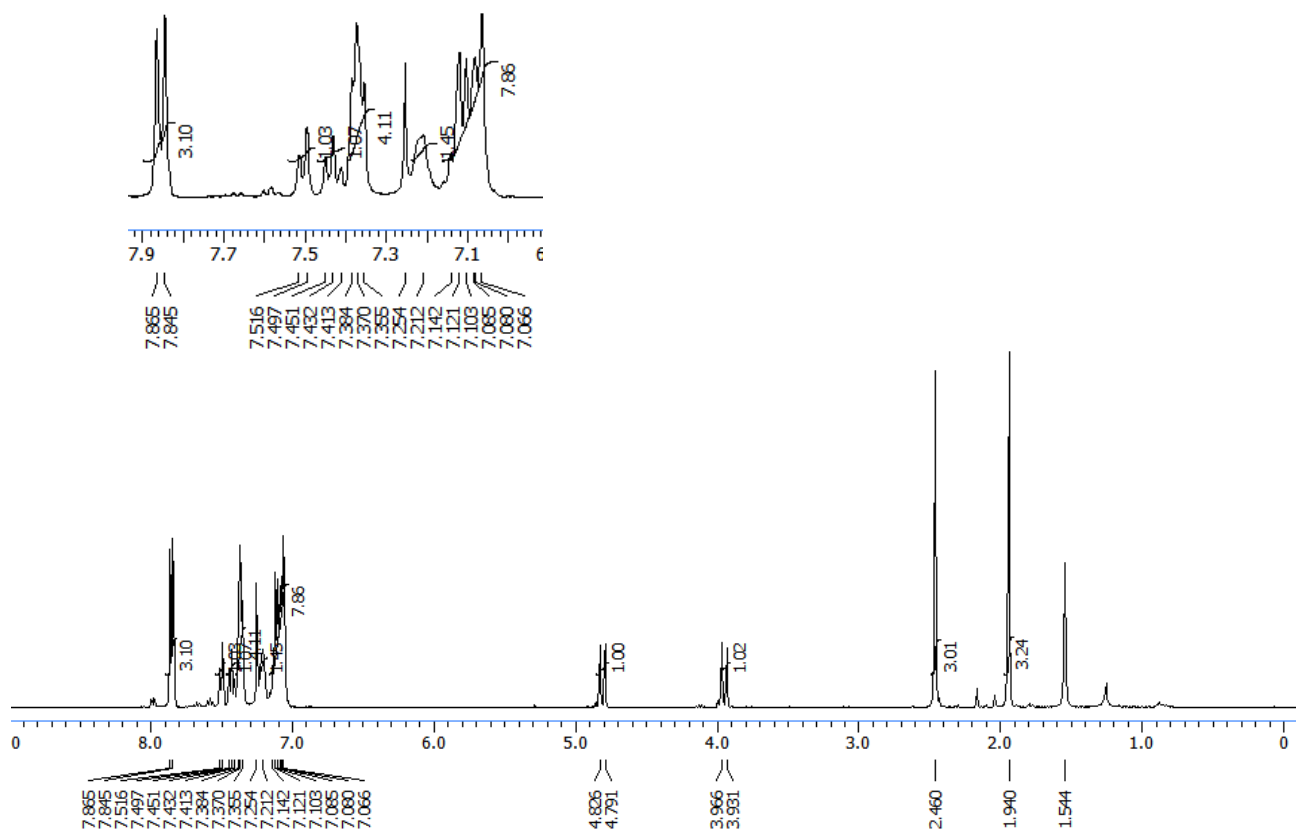

<sup>13</sup>C NMR spectrum of 3bi (100 MHz, CDCl<sub>3</sub>)

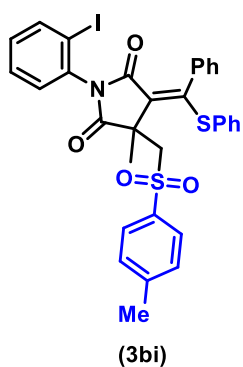

(*E*)-1-(2-iodophenyl)-3-methyl-4-(phenyl(phenylthio)methylene)-3-(tosylmethyl)pyrrolidine-2,5-dione

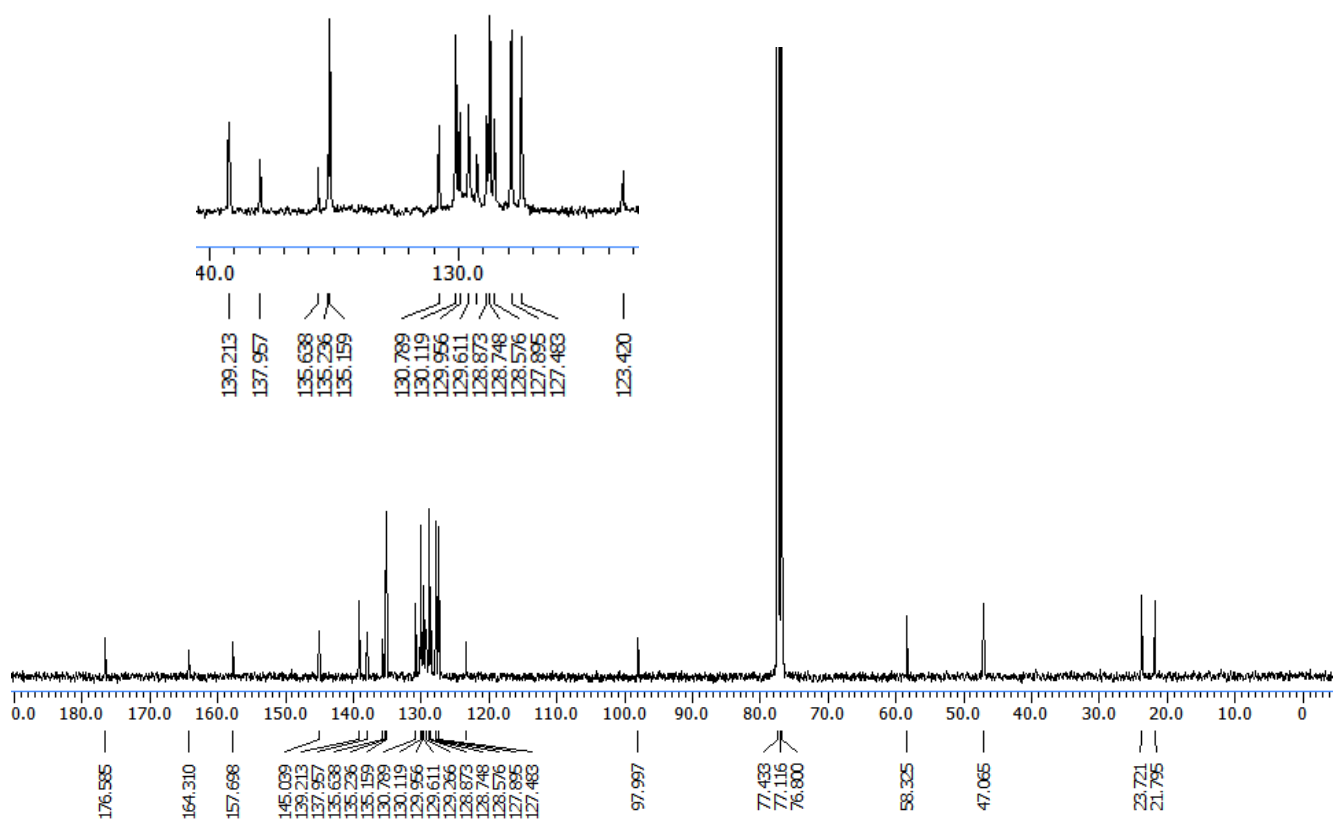

### HRMS spectrum of 3bi

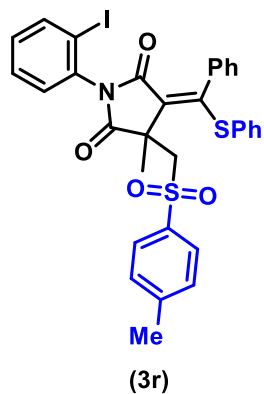

**(E)-1-(2-iodophenyl)-3-methyl-4-(phenyl(phenylthio)methylene)-3-(tosylmethyl)pyrrolidine-2,5-dione**

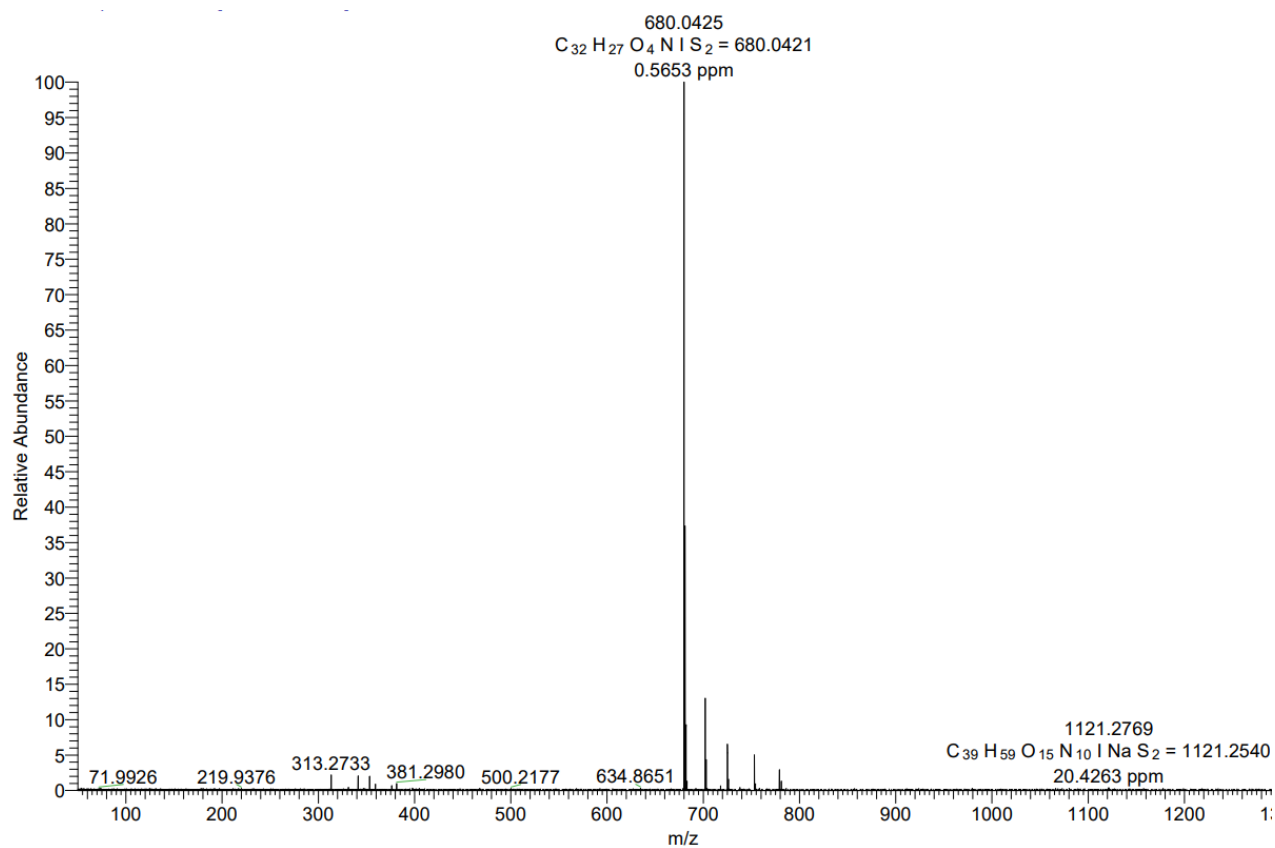

**<sup>1</sup>H NMR spectrum of 3bj (400 MHz, CDCl<sub>3</sub>)**

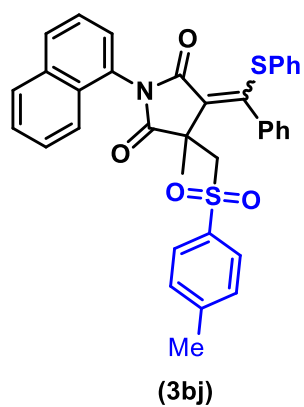

**3-methyl-1-(naphthalen-1-yl)-4-(phenyl(phenylthio)methylene)-3-(tosylmethyl)pyrrolidine-2,5-dione**

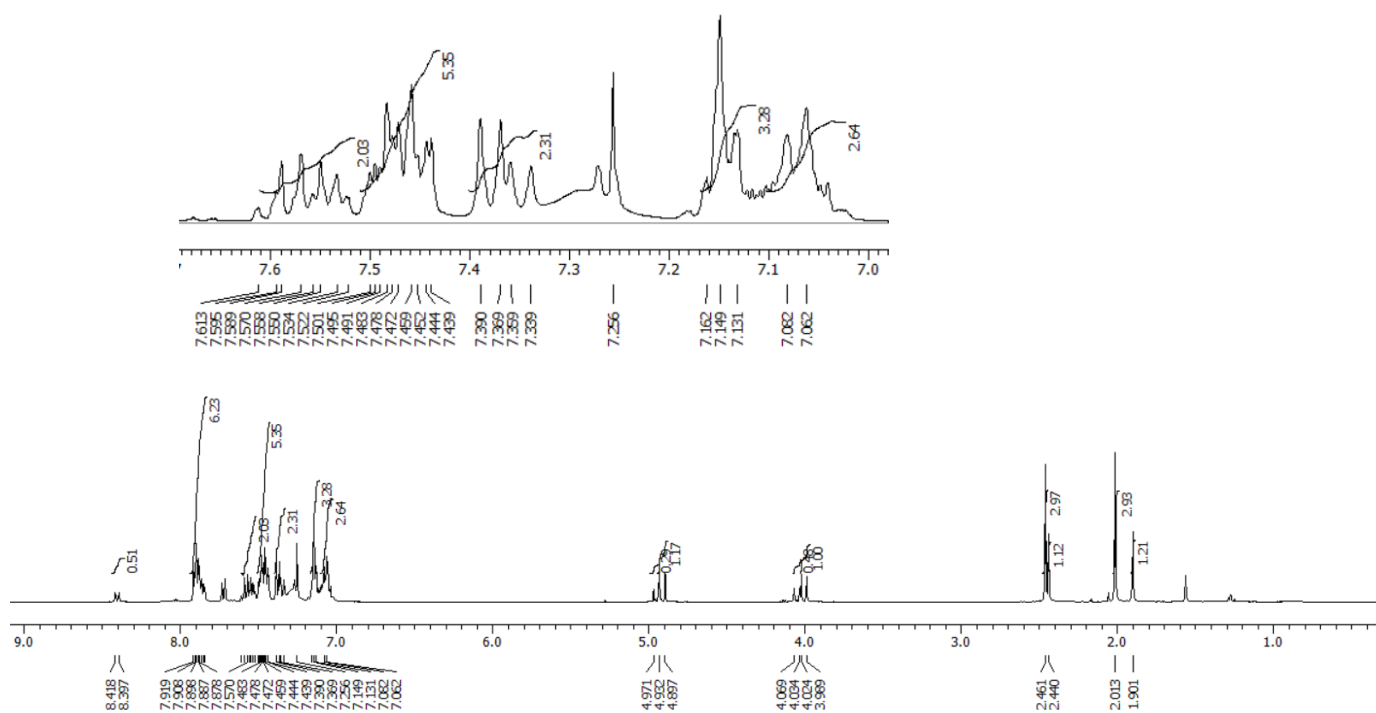



**<sup>13</sup>C NMR spectrum of 3bj (100 MHz, CDCl<sub>3</sub>)**

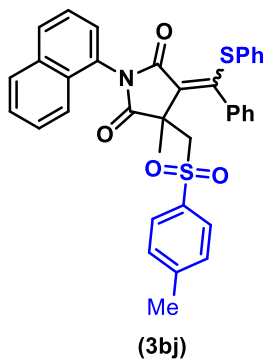

**3-methyl-1-(naphthalen-1-yl)-4-(phenyl(phenylthio)methylene)-3-(tosylmethyl)pyrrolidine-2,5-dione**

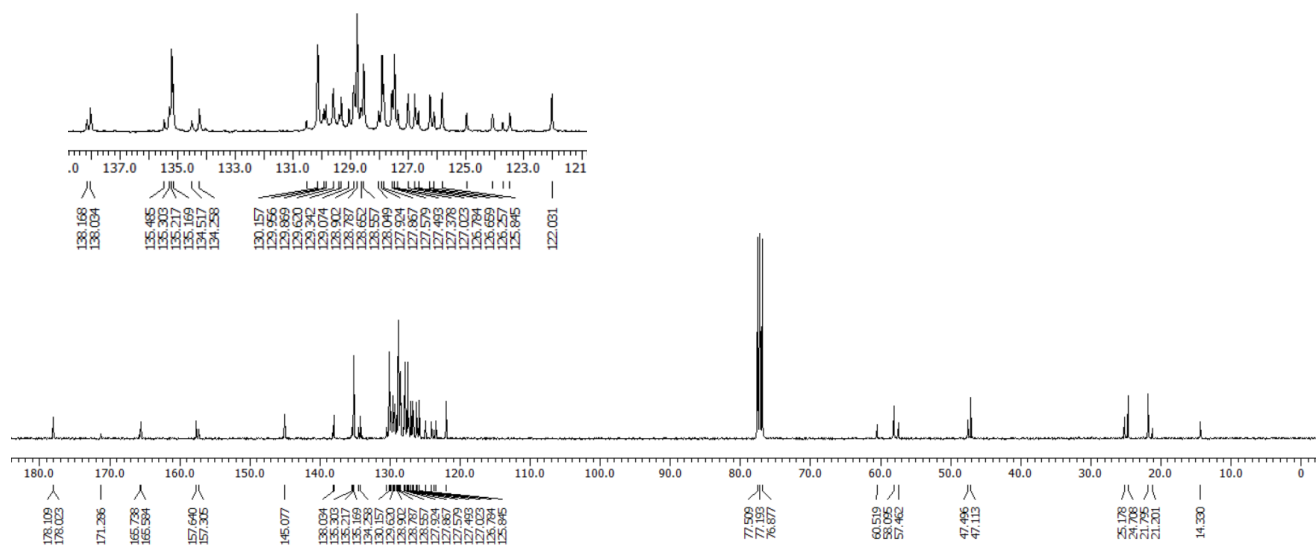

**HRMS spectrum of 3bj**

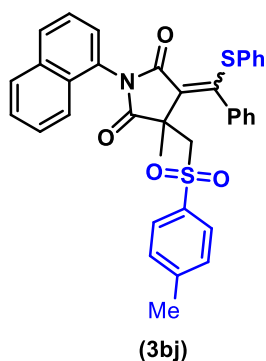

3-methyl-1-(naphthalen-1-yl)-4-(phenyl(phenylthio)methylene)-3-(tosylmethyl)pyrrolidine-2,5-dione

### Qualitative Compound Report

|                        |                             |               |                     |
|------------------------|-----------------------------|---------------|---------------------|
| Data File              | SMP-41.d                    | Sample Name   | SMP-41              |
| Sample Type            | Sample                      | Position      | P1-A6               |
| Instrument Name        | Instrument 1                | User Name     |                     |
| Acq Method             | MS Scan.m                   | Acquired Time | 28-04-2022 10:51:11 |
| IRM Calibration Status | Success                     | DA Method     | Default.m           |
| Comment                |                             |               |                     |
| Sample Group           |                             | Info.         | 3                   |
| Acquisition SW         | 6200 series TOF/6500 series |               |                     |
| Version                | Q-TOF B.05.01 (B5125)       |               |                     |

#### Compound Table

| Compound Label                                                          | RT    | Mass    | Formula                                                         | MFG Formula                                                     | MFG Diff (ppm) | DB Formula                                                      |
|-------------------------------------------------------------------------|-------|---------|-----------------------------------------------------------------|-----------------------------------------------------------------|----------------|-----------------------------------------------------------------|
| Cpd 16: C <sub>36</sub> H <sub>29</sub> N O <sub>4</sub> S <sub>2</sub> | 0.197 | 603.155 | C <sub>36</sub> H <sub>29</sub> N O <sub>4</sub> S <sub>2</sub> | C <sub>36</sub> H <sub>29</sub> N O <sub>4</sub> S <sub>2</sub> | -2.05          | C <sub>36</sub> H <sub>29</sub> N O <sub>4</sub> S <sub>2</sub> |

| Compound Label                                                          | m/z      | RT    | Algorithm                 | Mass    |
|-------------------------------------------------------------------------|----------|-------|---------------------------|---------|
| Cpd 16: C <sub>36</sub> H <sub>29</sub> N O <sub>4</sub> S <sub>2</sub> | 604.1623 | 0.197 | Find by Molecular Feature | 603.155 |

#### MFE MS Spectrum

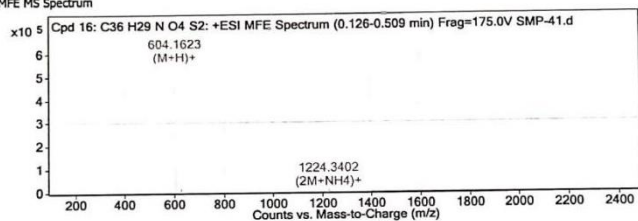

#### MFE MS Zoomed Spectrum

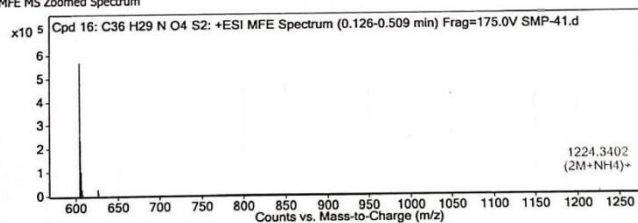

#### MS Spectrum Peak List

| m/z       | z | Abund     | Formula                                                            | Ion                    |
|-----------|---|-----------|--------------------------------------------------------------------|------------------------|
| 604.1623  | 1 | 579030.63 | C <sub>36</sub> H <sub>30</sub> N O <sub>4</sub> S <sub>2</sub>    | (M+H)+                 |
| 605.1652  | 1 | 232107.23 | C <sub>36</sub> H <sub>30</sub> N O <sub>4</sub> S <sub>2</sub>    | (M+H)+                 |
| 606.1638  | 1 | 96581.18  | C <sub>36</sub> H <sub>30</sub> N O <sub>4</sub> S <sub>2</sub>    | (M+H)+                 |
| 607.1653  | 1 | 27481.75  | C <sub>36</sub> H <sub>30</sub> N O <sub>4</sub> S <sub>2</sub>    | (M+H)+                 |
| 608.1664  | 1 | 6773.76   | C <sub>36</sub> H <sub>30</sub> N O <sub>4</sub> S <sub>2</sub>    | (M+H)+                 |
| 626.144   | 1 | 27243.95  | C <sub>36</sub> H <sub>29</sub> N Na O <sub>4</sub> S <sub>2</sub> | (M+Na)+                |
| 627.1469  | 1 | 12238.35  | C <sub>36</sub> H <sub>29</sub> N Na O <sub>4</sub> S <sub>2</sub> | (M+Na)+                |
| 642.1206  | 1 | 9460.14   |                                                                    | (M+K)+                 |
| 1224.3402 | 1 | 11070.97  |                                                                    | (2M+NH <sub>4</sub> )+ |
| 1225.3437 | 1 | 8821.13   |                                                                    | (2M+NH <sub>4</sub> )+ |

<sup>1</sup>H NMR spectrum of 3bk (400 MHz, CDCl<sub>3</sub>)

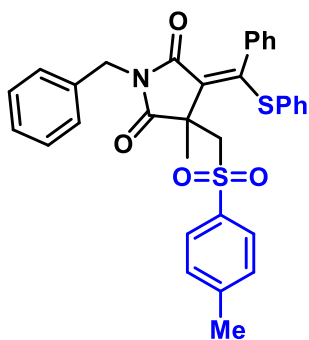

(3bk)

(E)-1-benzyl-3-methyl-4-(phenyl(phenylthio)methylene)-3-(tosylmethyl)pyrrolidine-2,5-dione

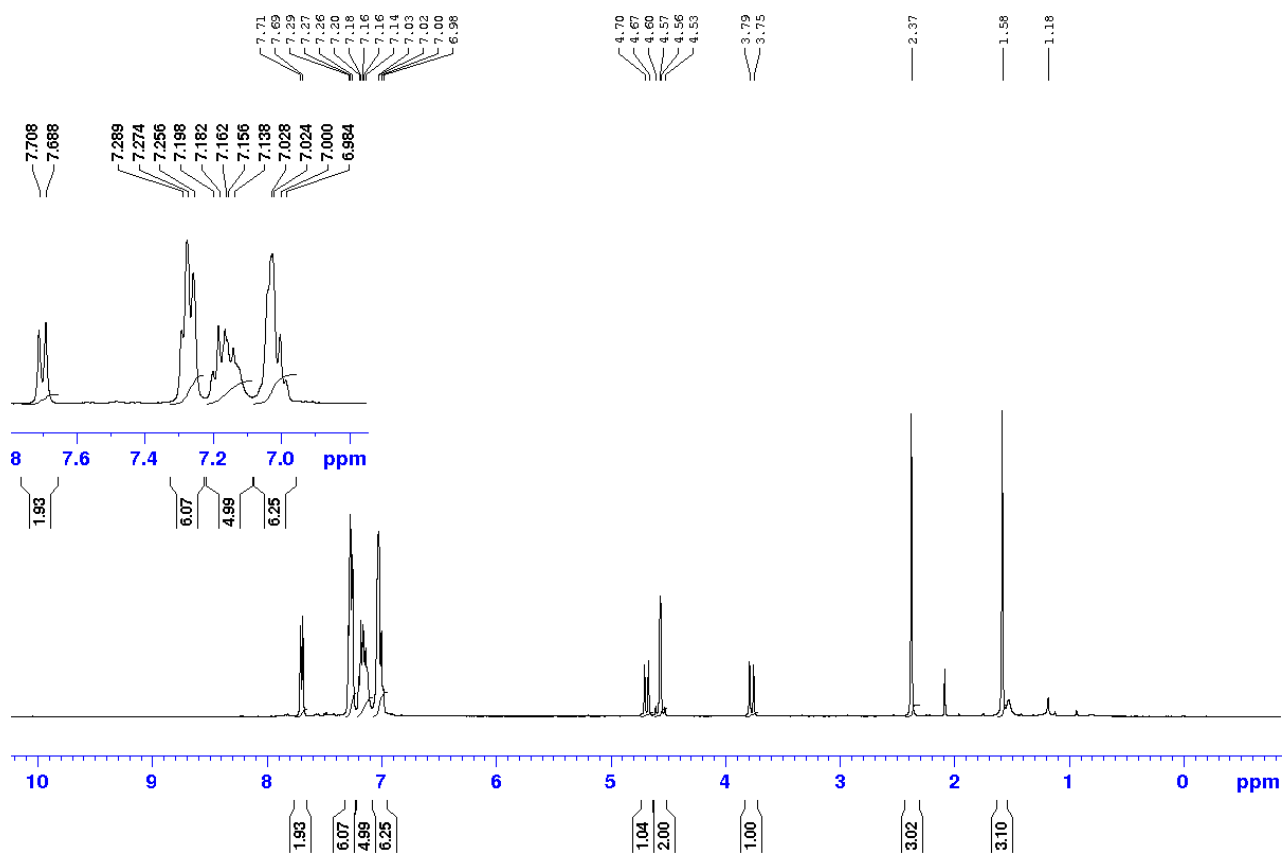

$^{13}\text{C}$  NMR spectrum of 3bk (100 MHz,  $\text{CDCl}_3$ )

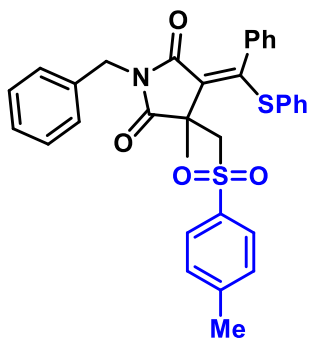

(3bk)

(*E*)-1-benzyl-3-methyl-4-(phenyl(phenylthio)methylene)-3-(tosylmethyl)pyrrolidine-2,5-dione

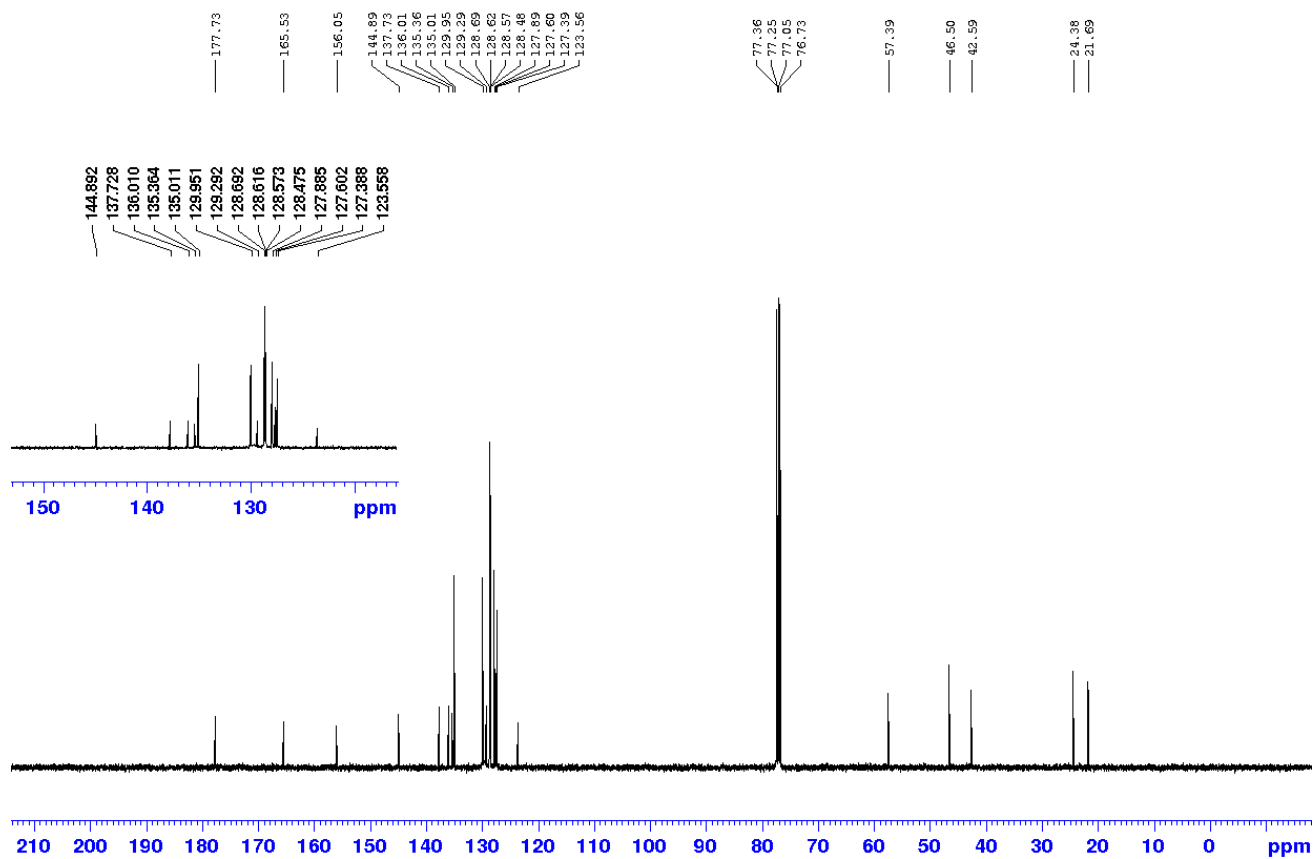

HRMS spectrum of 3bk

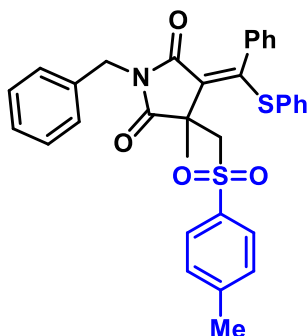

(3bk)

(E)-1-benzyl-3-methyl-4-(phenyl(phenylthio)methylene)-3-(tosylmethyl)pyrrolidine-2,5-dione

### Qualitative Compound Report

Data File SMP-42.d Sample Name SMP-42  
 Sample Type Sample Position P1-A5  
 Instrument Name Instrument 1 User Name  
 Acq Method MS Scan.m Acquired Time 02-05-2022 11:39:06  
 IRM Calibration Status Success DA Method Default.m  
 Comment

Sample Group Info. 3  
 Acquisition SW 6200 series TOF/6500 series  
 Version Q-TOF B.05.01 (B5125)

| Compound Label          | RT    | Mass     | Formula         | MFG Formula     | MFG Diff (ppm) | DB Formula      |
|-------------------------|-------|----------|-----------------|-----------------|----------------|-----------------|
| Cpd 23: C33 H29 N O4 S2 | 0.204 | 567.1538 | C33 H29 N O4 S2 | C33 H29 N O4 S2 | -0.05          | C33 H29 N O4 S2 |

| Compound Label          | m/z      | RT    | Algorithm                 | Mass     |
|-------------------------|----------|-------|---------------------------|----------|
| Cpd 23: C33 H29 N O4 S2 | 568.1614 | 0.204 | Find by Molecular Feature | 567.1538 |

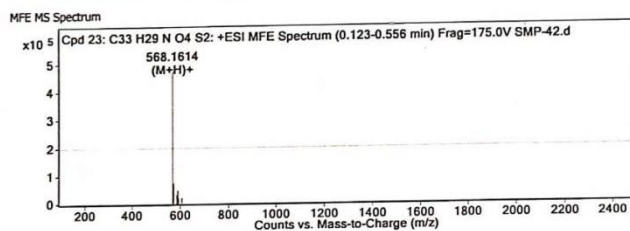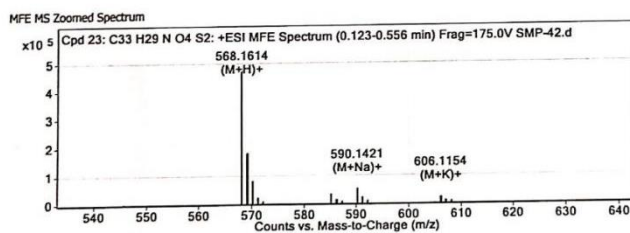

MS Spectrum Peak List

| m/z      | z | Abund     | Formula            | Ion      |
|----------|---|-----------|--------------------|----------|
| 568.1614 | 1 | 475761.41 | C33 H30 N O4 S2    | (M+H)+   |
| 569.1641 | 1 | 175481.3  | C33 H30 N O4 S2    | (M+H)+   |
| 570.1611 | 1 | 74361.71  | C33 H30 N O4 S2    | (M+H)+   |
| 571.1611 | 1 | 21925.35  | C33 H30 N O4 S2    | (M+H)+   |
| 585.1861 | 1 | 30009.82  | C33 H33 N2 O4 S2   | (M+NH4)+ |
| 586.1899 | 1 | 12226.39  | C33 H33 N2 O4 S2   | (M+NH4)+ |
| 590.1421 | 1 | 49186.74  | C33 H29 N Na O4 S2 | (M+Na)+  |
| 591.1455 | 1 | 19545.25  | C33 H29 N Na O4 S2 | (M+Na)+  |
| 592.1395 | 1 | 9372.95   | C33 H29 N Na O4 S2 | (M+Na)+  |
| 606.1154 | 1 | 19620.28  | C33 H29 K N O4 S2  | (M+K)+   |

<sup>1</sup>H NMR spectrum of 3bl (400 MHz, CDCl<sub>3</sub>)

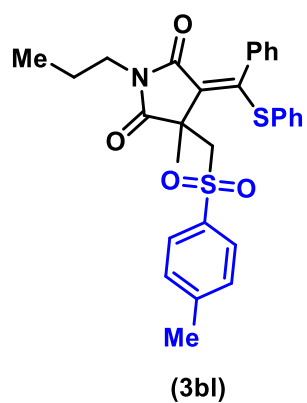

**(E)-3-methyl-4-(phenyl(phenylthio)methylene)-1-propyl-3-(tosylmethyl)pyrrolidine-2,5-dione**

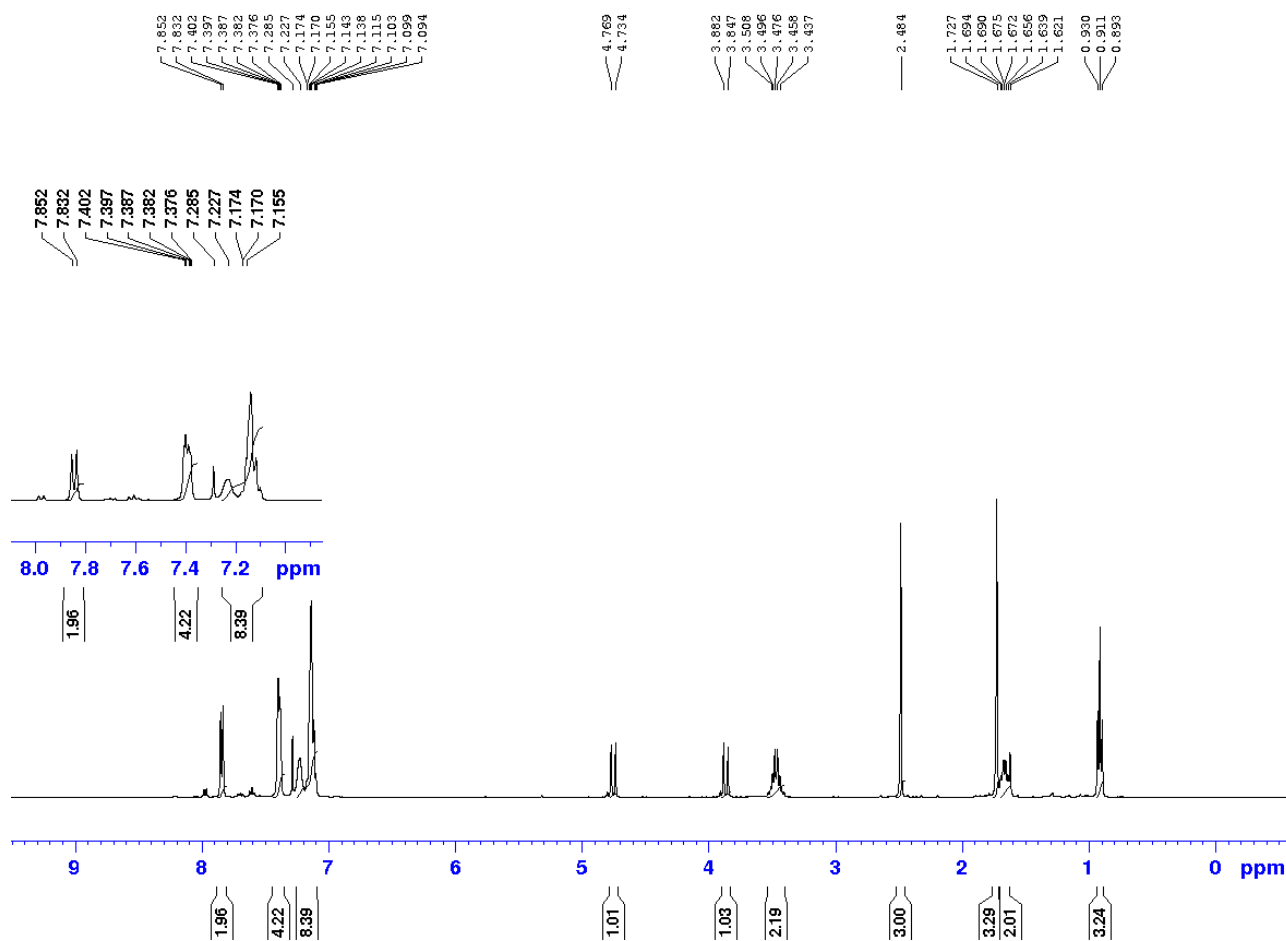

<sup>13</sup>C NMR spectrum of 3bl (100 MHz, CDCl<sub>3</sub>)

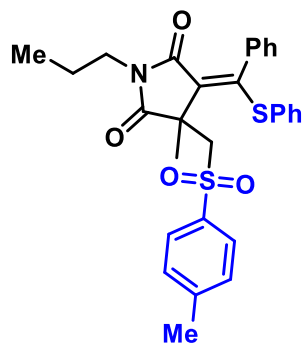

(3bl)

(*E*)-3-methyl-4-(phenyl(phenylthio)methylene)-1-propyl-3-(tosylmethyl)pyrrolidine-2,5-dione

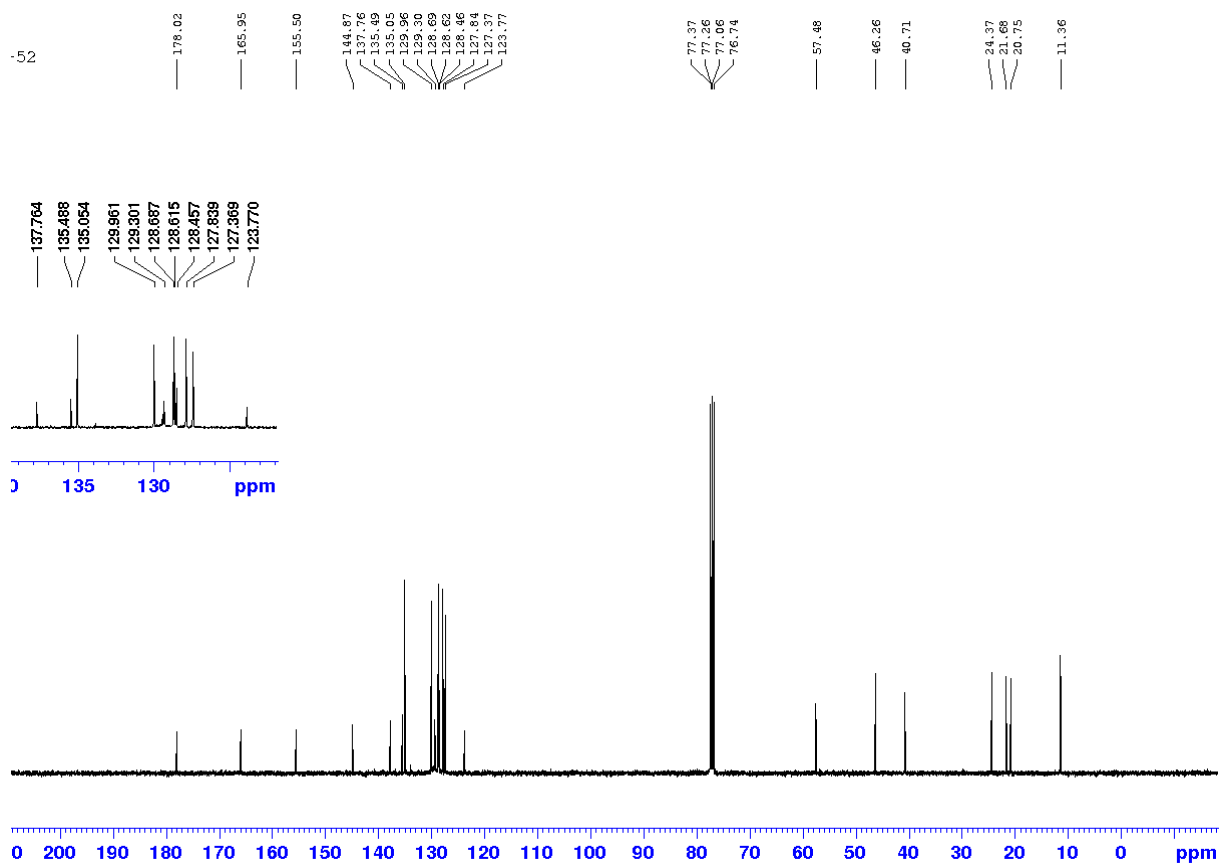

HRMS spectrum of 3bl

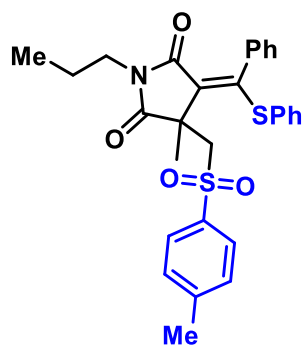

(3bl)

*(E)*-3-methyl-4-(phenyl(phenylthio)methylene)-1-propyl-3-(tosylmethyl)pyrrolidine-2,5-dione

### Qualitative Compound Report

|                        |              |               |                     |
|------------------------|--------------|---------------|---------------------|
| Data File              | SMP-52.d     | Sample Name   | SMP-52              |
| Sample Type            | Sample       | Position      | PI-B1               |
| Instrument Name        | Instrument 1 | User Name     |                     |
| Acq Method             | MS Scan.m    | Acquired Time | 21-05-2022 12:30:30 |
| IRM Calibration Status | Success      | DA Method     | Default.m           |
| Comment                |              |               |                     |

|                |                             |   |
|----------------|-----------------------------|---|
| Sample Group   | Info.                       | 3 |
| Acquisition SW | 6200 series TOF/6500 series |   |
| Version        | Q-TOF B.05.01 (B5125)       |   |

#### Compound Table

| Compound Label                                                         | RT    | Mass     | Formula                                                         | MFG Formula                                                     | MFG Diff (ppm) | DB Formula                                                      |
|------------------------------------------------------------------------|-------|----------|-----------------------------------------------------------------|-----------------------------------------------------------------|----------------|-----------------------------------------------------------------|
| Cpd 7: C <sub>29</sub> H <sub>29</sub> N O <sub>4</sub> S <sub>2</sub> | 0.185 | 519.1553 | C <sub>29</sub> H <sub>29</sub> N O <sub>4</sub> S <sub>2</sub> | C <sub>29</sub> H <sub>29</sub> N O <sub>4</sub> S <sub>2</sub> | -2.86          | C <sub>29</sub> H <sub>29</sub> N O <sub>4</sub> S <sub>2</sub> |

| Compound Label                                                         | m/z      | RT    | Algorithm                 | Mass     |
|------------------------------------------------------------------------|----------|-------|---------------------------|----------|
| Cpd 7: C <sub>29</sub> H <sub>29</sub> N O <sub>4</sub> S <sub>2</sub> | 520.1624 | 0.185 | Find by Molecular Feature | 519.1553 |

#### MFE MS Spectrum

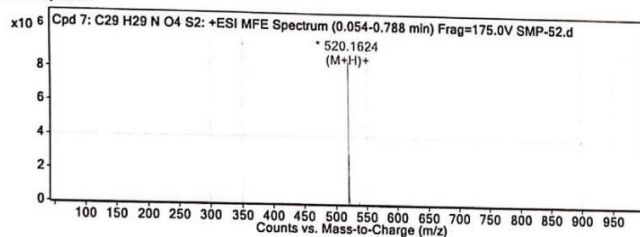

#### MFE MS Zoomed Spectrum

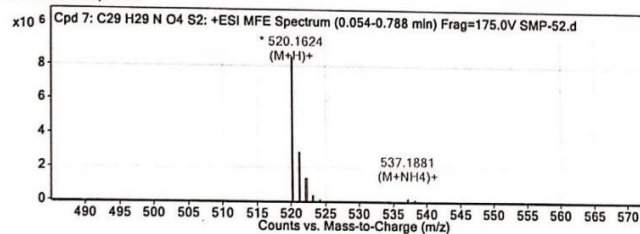

#### MS Spectrum Peak List

| m/z      | z | Abund     | Formula                                                                      | Ion                   |
|----------|---|-----------|------------------------------------------------------------------------------|-----------------------|
| 520.1624 | 1 | 8535982   | C <sub>29</sub> H <sub>30</sub> N O <sub>4</sub> S <sub>2</sub>              | (M+H)+                |
| 521.1657 | 1 | 2929043.6 | C <sub>29</sub> H <sub>30</sub> N O <sub>4</sub> S <sub>2</sub>              | (M+H)+                |
| 522.1635 | 1 | 1270176.8 | C <sub>29</sub> H <sub>30</sub> N O <sub>4</sub> S <sub>2</sub>              | (M+H)+                |
| 523.1641 | 1 | 303783.66 | C <sub>29</sub> H <sub>30</sub> N O <sub>4</sub> S <sub>2</sub>              | (M+H)+                |
| 524.1627 | 1 | 64535.73  | C <sub>29</sub> H <sub>30</sub> N O <sub>4</sub> S <sub>2</sub>              | (M+H)+                |
| 525.1617 | 1 | 10146.59  | C <sub>29</sub> H <sub>30</sub> N O <sub>4</sub> S <sub>2</sub>              | (M+H)+                |
| 526.163  | 1 | 2280.58   | C <sub>29</sub> H <sub>30</sub> N O <sub>4</sub> S <sub>2</sub>              | (M+H)+                |
| 537.1881 | 1 | 111329.6  | C <sub>29</sub> H <sub>33</sub> N <sub>2</sub> O <sub>4</sub> S <sub>2</sub> | (M+NH <sub>4</sub> )+ |
| 538.1908 | 1 | 34077.82  | C <sub>29</sub> H <sub>33</sub> N <sub>2</sub> O <sub>4</sub> S <sub>2</sub> | (M+NH <sub>4</sub> )+ |

<sup>1</sup>H NMR spectrum of 3bm (400 MHz, CDCl<sub>3</sub>)



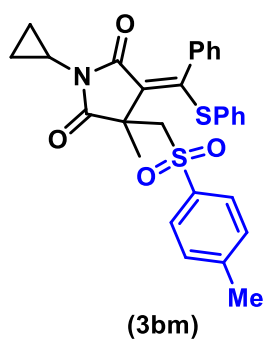

**(E)-1-cyclopropyl-3-methyl-4-(phenyl(phenylthio)methylene)-3-(tosylmethyl)pyrrolidine-2,5-dione**

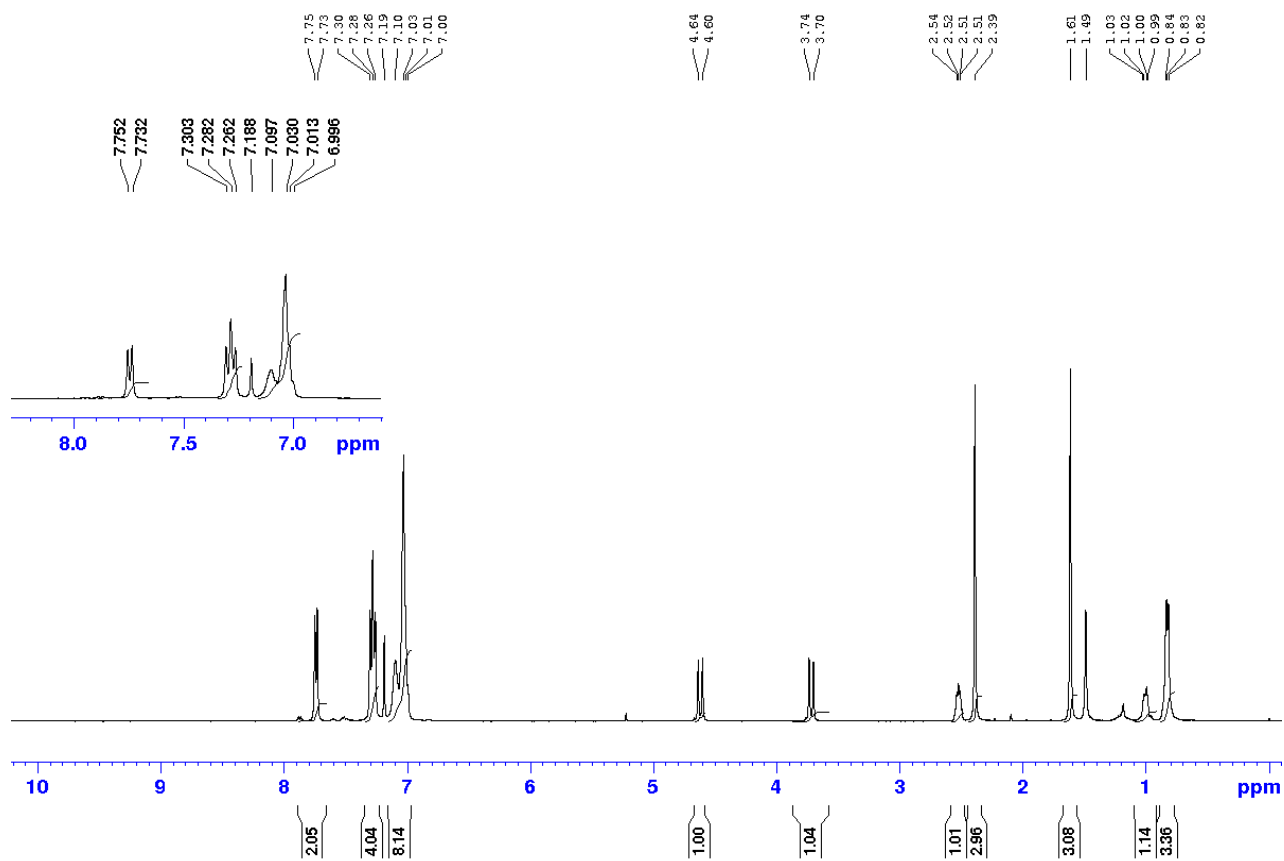

**$^{13}\text{C}$  NMR spectrum of 3bm (100 MHz,  $\text{CDCl}_3$ )**

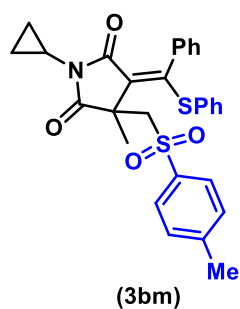

(E)-1-cyclopropyl-3-methyl-4-(phenyl(phenylthio)methylene)-3-(tosylmethyl)pyrrolidine-2,5-dione

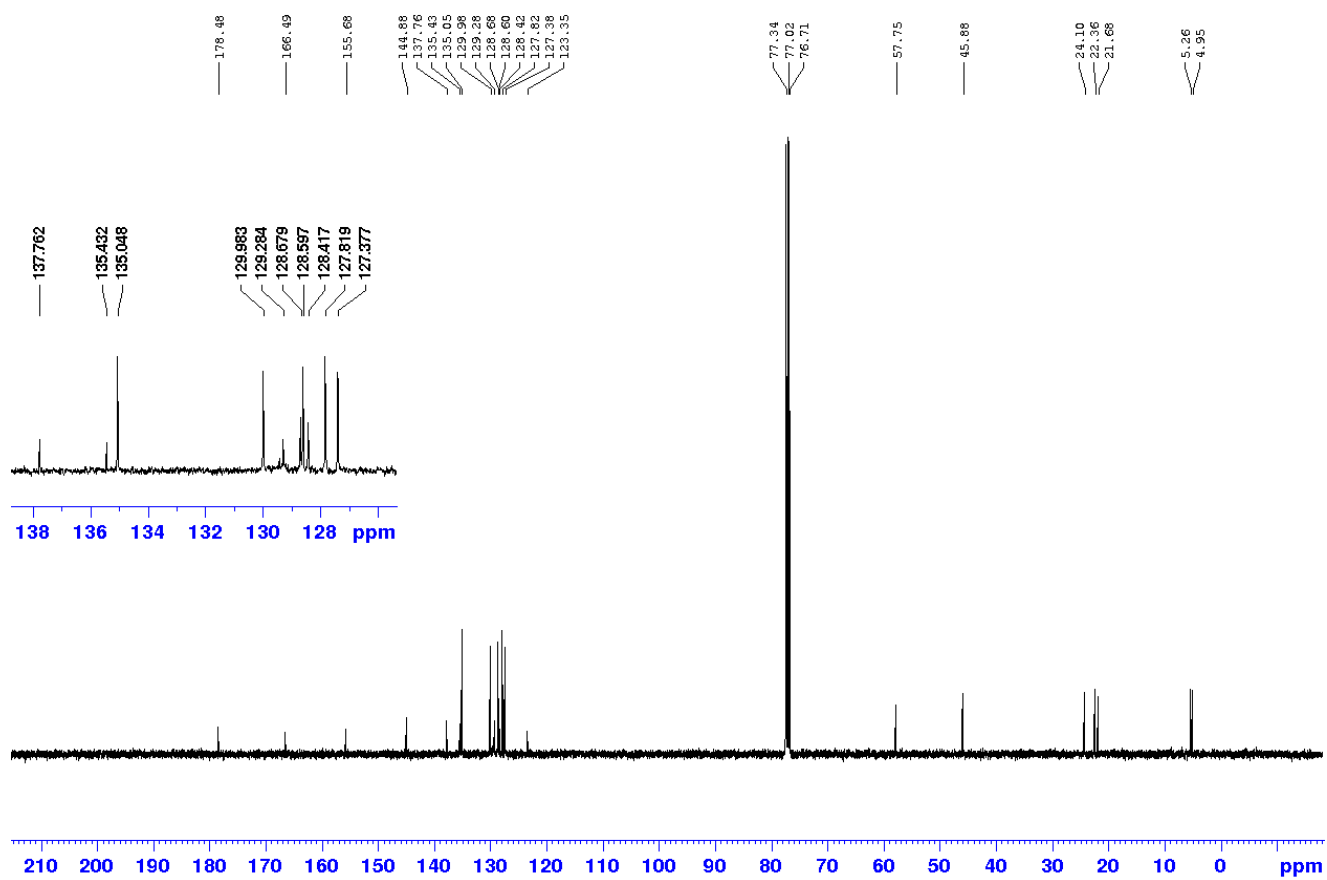

HRMS Spectrum of 3bm

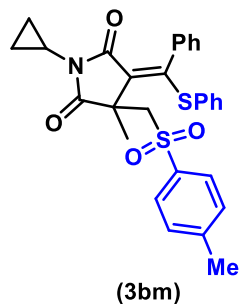

(E)-1-cyclopropyl-3-methyl-4-(phenyl(phenylthio)methylene)-3-(tosylmethyl)pyrrolidine-2,5-dione

### Qualitative Compound Report

|                        |              |               |                     |
|------------------------|--------------|---------------|---------------------|
| Data File              | SMP-47.d     | Sample Name   | SMP-47              |
| Sample Type            | Sample       | Position      | P1-A1               |
| Instrument Name        | Instrument 1 | User Name     |                     |
| Acq Method             | MS Scan.m    | Acquired Time | 02-05-2022 11:32:08 |
| IRM Calibration Status | Success      | DA Method     | Default.m           |
| Comment                |              |               |                     |

|                |                             |   |
|----------------|-----------------------------|---|
| Sample Group   | Info.                       | 3 |
| Acquisition SW | 6200 series TOF/6500 series |   |
| Version        | Q-TOF B.05.01 (B5125)       |   |

Compound Table

| Compound Label                                                         | RT    | Mass     | Formula                                                         | MFG Formula                                                     | MFG Diff (ppm) | DB Formula                                                      |
|------------------------------------------------------------------------|-------|----------|-----------------------------------------------------------------|-----------------------------------------------------------------|----------------|-----------------------------------------------------------------|
| Cpd 5: C <sub>29</sub> H <sub>27</sub> N O <sub>4</sub> S <sub>2</sub> | 0.201 | 517.1388 | C <sub>29</sub> H <sub>27</sub> N O <sub>4</sub> S <sub>2</sub> | C <sub>29</sub> H <sub>27</sub> N O <sub>4</sub> S <sub>2</sub> | -1.32          | C <sub>29</sub> H <sub>27</sub> N O <sub>4</sub> S <sub>2</sub> |

| Compound Label                                                         | m/z      | RT    | Algorithm                 | Mass     |
|------------------------------------------------------------------------|----------|-------|---------------------------|----------|
| Cpd 5: C <sub>29</sub> H <sub>27</sub> N O <sub>4</sub> S <sub>2</sub> | 518.1461 | 0.201 | Find by Molecular Feature | 517.1388 |

MFE MS Spectrum

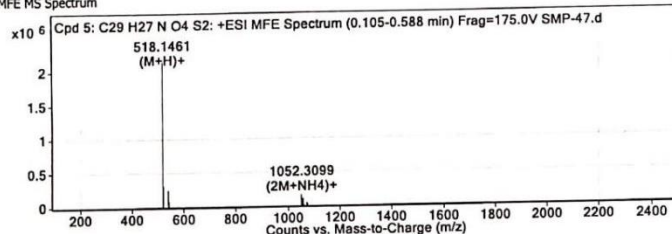

MFE MS Zoomed Spectrum

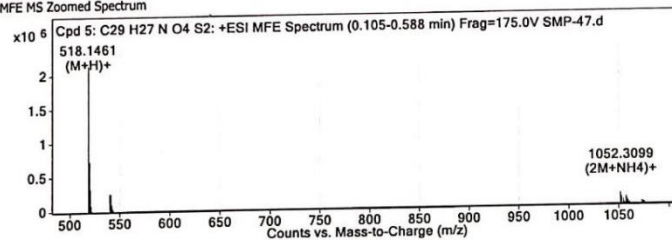

MS Spectrum Peak List

| m/z       | z | Abund      | Formula                                                            | Ion                    |
|-----------|---|------------|--------------------------------------------------------------------|------------------------|
| 518.1461  | 1 | 2141317.75 | C <sub>29</sub> H <sub>28</sub> N O <sub>4</sub> S <sub>2</sub>    | (M+H)+                 |
| 519.1493  | 1 | 732881.95  | C <sub>29</sub> H <sub>28</sub> N O <sub>4</sub> S <sub>2</sub>    | (M+H)+                 |
| 520.1462  | 1 | 307246.26  | C <sub>29</sub> H <sub>28</sub> N O <sub>4</sub> S <sub>2</sub>    | (M+H)+                 |
| 521.147   | 1 | 74109.12   | C <sub>29</sub> H <sub>28</sub> N O <sub>4</sub> S <sub>2</sub>    | (M+H)+                 |
| 540.1278  | 1 | 249084.36  | C <sub>29</sub> H <sub>27</sub> N Na O <sub>4</sub> S <sub>2</sub> | (M+Na)+                |
| 541.1305  | 1 | 82245.06   | C <sub>29</sub> H <sub>27</sub> N Na O <sub>4</sub> S <sub>2</sub> | (M+Na)+                |
| 1052.3099 | 1 | 157159.11  |                                                                    | (2M+NH <sub>4</sub> )+ |
| 1053.3126 | 1 | 106410.59  |                                                                    | (2M+NH <sub>4</sub> )+ |
| 1057.2659 | 1 | 102381.66  |                                                                    | (2M+Na)+               |
| 1058.2685 | 1 | 67179.77   |                                                                    | (2M+Na)+               |

<sup>1</sup>H NMR spectrum of 3ca (400 MHz, CDCl<sub>3</sub>)

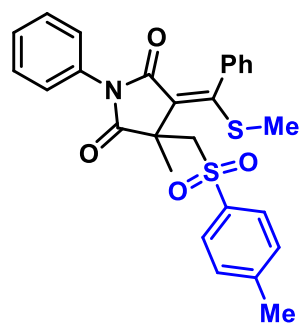

(3ca)

(*E*)-3-methyl-4-((methylthio)(phenyl)methylene)-1-phenyl-3-(tosylmethyl)pyrrolidine-2,5-dione

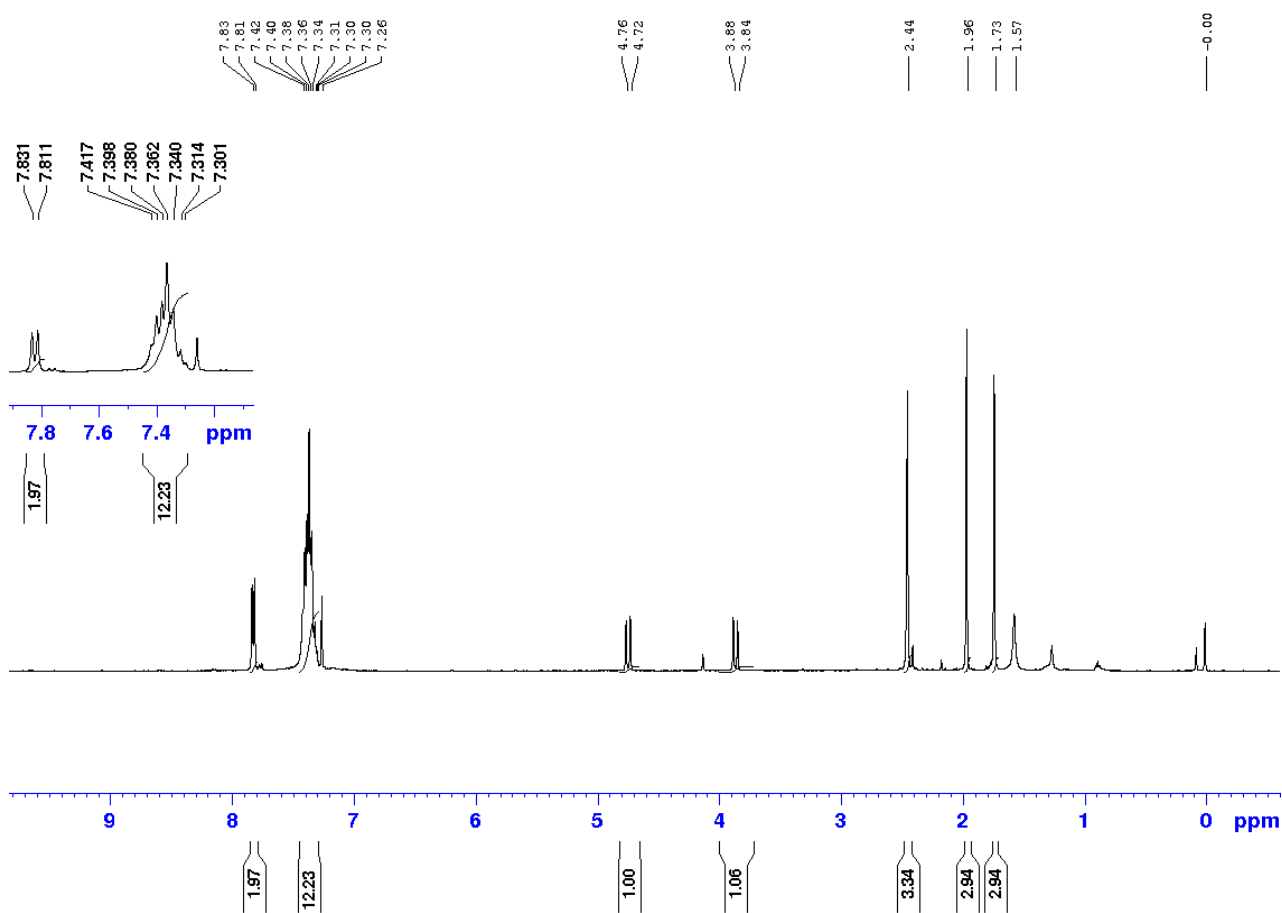

<sup>13</sup>C NMR spectrum of 3ca (100 MHz, CDCl<sub>3</sub>)

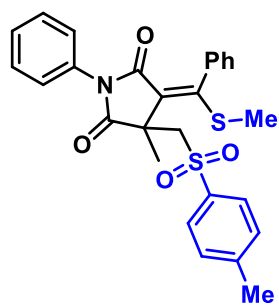

(3ca)

(E)-3-methyl-4-((methylthio)(phenyl)methylene)-1-phenyl-3-(tosylmethyl)pyrrolidine-2,5-dione

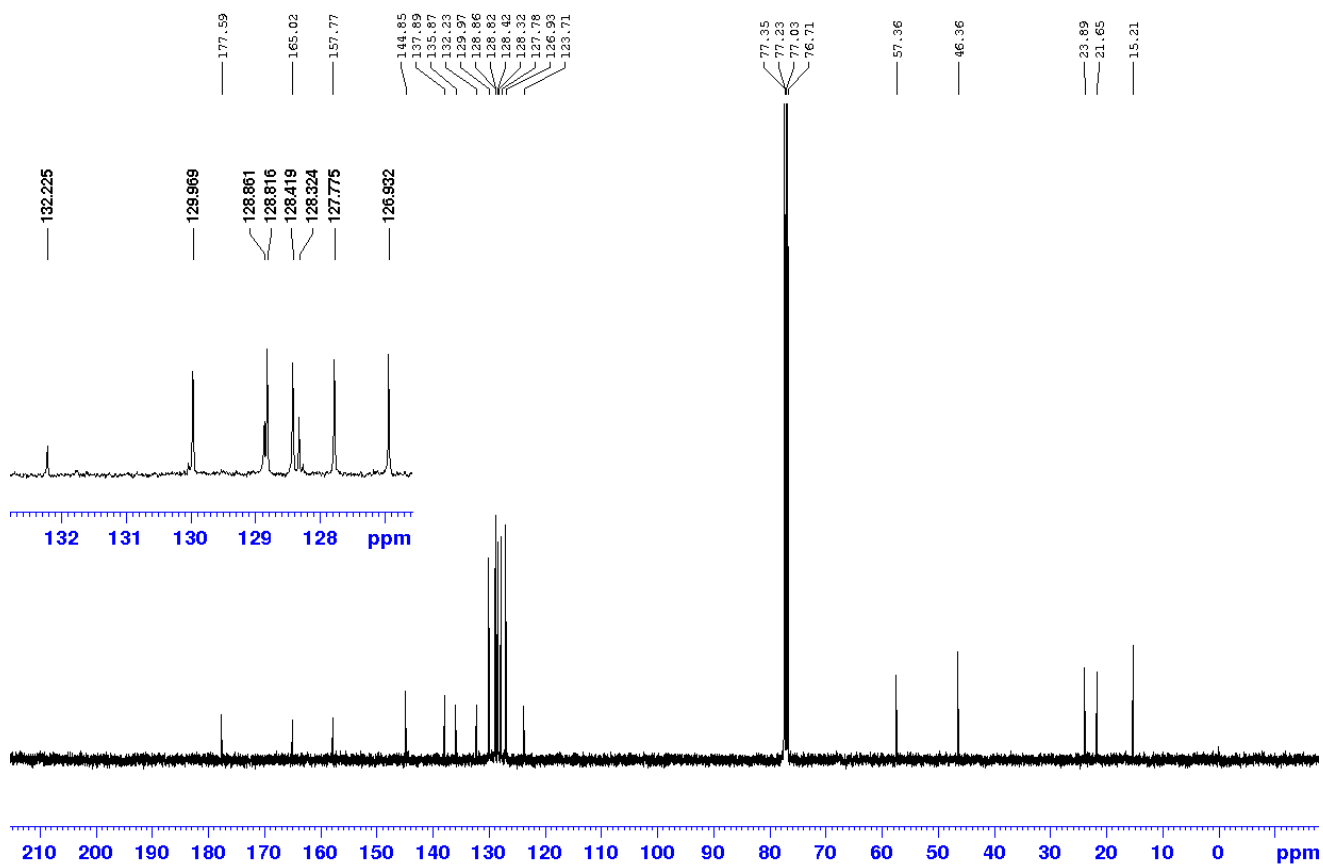

HRMS Spectrum of 3ca

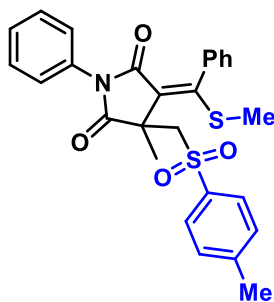

(3ca)

(E)-3-methyl-4-((methylthio)(phenyl)methylene)-1-phenyl-3-(tosylmethyl)pyrrolidine-2,5-dione

### Qualitative Compound Report

|                        |              |               |                     |
|------------------------|--------------|---------------|---------------------|
| Data File              | SMD-6.d      | Sample Name   | SMD-6               |
| Sample Type            | Sample       | Position      | P1-C1               |
| Instrument Name        | Instrument 1 | User Name     |                     |
| Acq Method             | MS Scan.m    | Acquired Time | 26-05-2022 14:52:09 |
| IRM Calibration Status | Success      | DA Method     | Default.m           |
| Comment                |              |               |                     |

|                |                             |       |   |
|----------------|-----------------------------|-------|---|
| Sample Group   |                             | Info. | 3 |
| Acquisition SW | 6200 series TOF/6500 series |       |   |
| Version        | Q-TOF B.05.01 (85125)       |       |   |

#### Compound Table

| Compound Label          | RT    | Mass     | Formula         | MFG Formula     | MFG Diff (ppm) | DB Formula      |
|-------------------------|-------|----------|-----------------|-----------------|----------------|-----------------|
| Cpd 22: C27 H25 N O4 S2 | 0.175 | 491.1243 | C27 H25 N O4 S2 | C27 H25 N O4 S2 | -3.7           | C27 H25 N O4 S2 |

| Compound Label          | m/z      | RT    | Algorithm                 | Mass     |
|-------------------------|----------|-------|---------------------------|----------|
| Cpd 22: C27 H25 N O4 S2 | 492.1316 | 0.175 | Find by Molecular Feature | 491.1243 |

#### MFE MS Spectrum

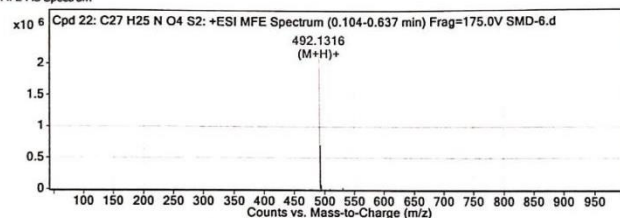

#### MFE MS Zoomed Spectrum

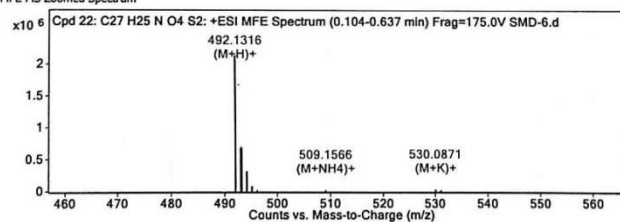

#### MS Spectrum Peak List

| m/z      | z | Abund     | Formula           | Ion      |
|----------|---|-----------|-------------------|----------|
| 492.1316 | 1 | 2150319.5 | C27 H26 N O4 S2   | (M+H)+   |
| 493.1347 | 1 | 705296.08 | C27 H26 N O4 S2   | (M+H)+   |
| 494.1315 | 1 | 294695.24 | C27 H26 N O4 S2   | (M+H)+   |
| 495.1323 | 1 | 66303.24  | C27 H26 N O4 S2   | (M+H)+   |
| 496.1316 | 1 | 15138.21  | C27 H26 N O4 S2   | (M+H)+   |
| 509.1566 | 1 | 18154.05  | C27 H29 N2 O4 S2  | (M+NH4)+ |
| 510.1594 | 1 | 6097.5    | C27 H29 N2 O4 S2  | (M+NH4)+ |
| 530.0871 | 1 | 27806.61  | C27 H25 K N O4 S2 | (M+K)+   |
| 531.0906 | 1 | 9037.55   | C27 H25 K N O4 S2 | (M+K)+   |
| 532.0882 | 1 | 5841.85   | C27 H25 K N O4 S2 | (M+K)+   |

<sup>1</sup>H NMR spectrum of 3cb (400 MHz, CDCl<sub>3</sub>)

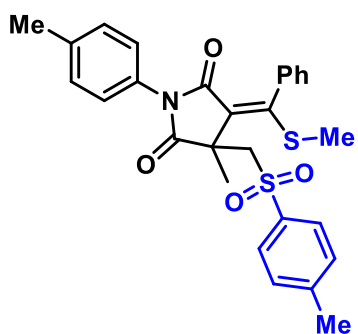

(3cb)

(*E*)-3-methyl-4-((methylthio)(phenyl)methylene)-1-(*p*-tolyl)-3-(tosylmethyl)pyrrolidine-2,5-dione

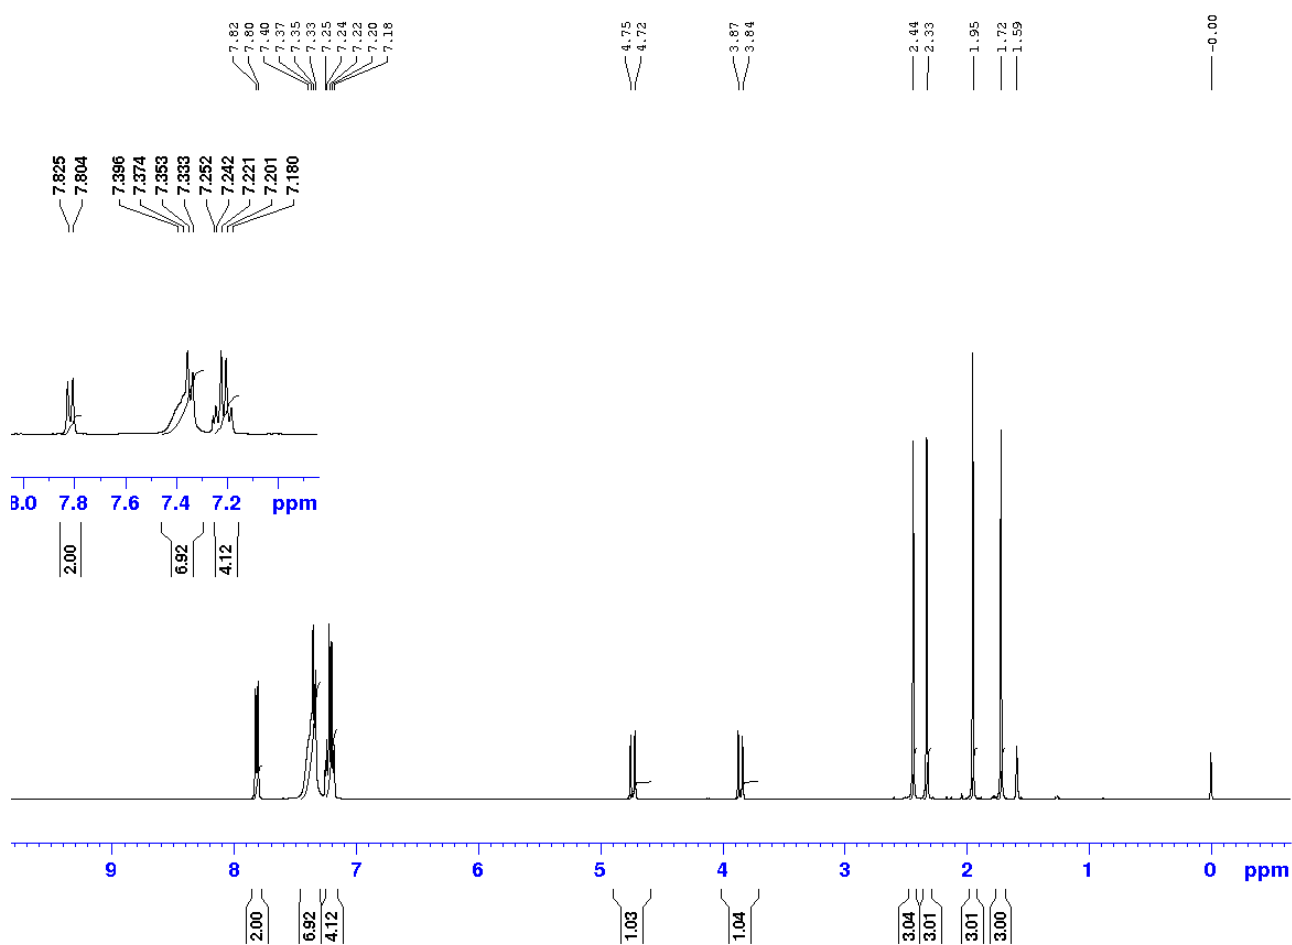

<sup>13</sup>C NMR spectrum of 3cb (100 MHz, CDCl<sub>3</sub>)

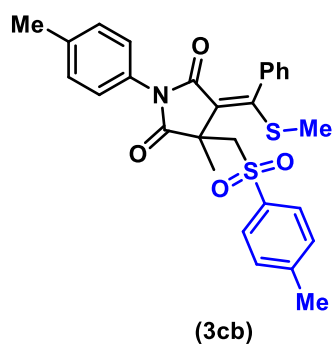

**(E)-3-methyl-4-((methylthio)(phenyl)methylene)-1-(p-tolyl)-3-(tosylmethyl)pyrrolidine-2,5-dione**

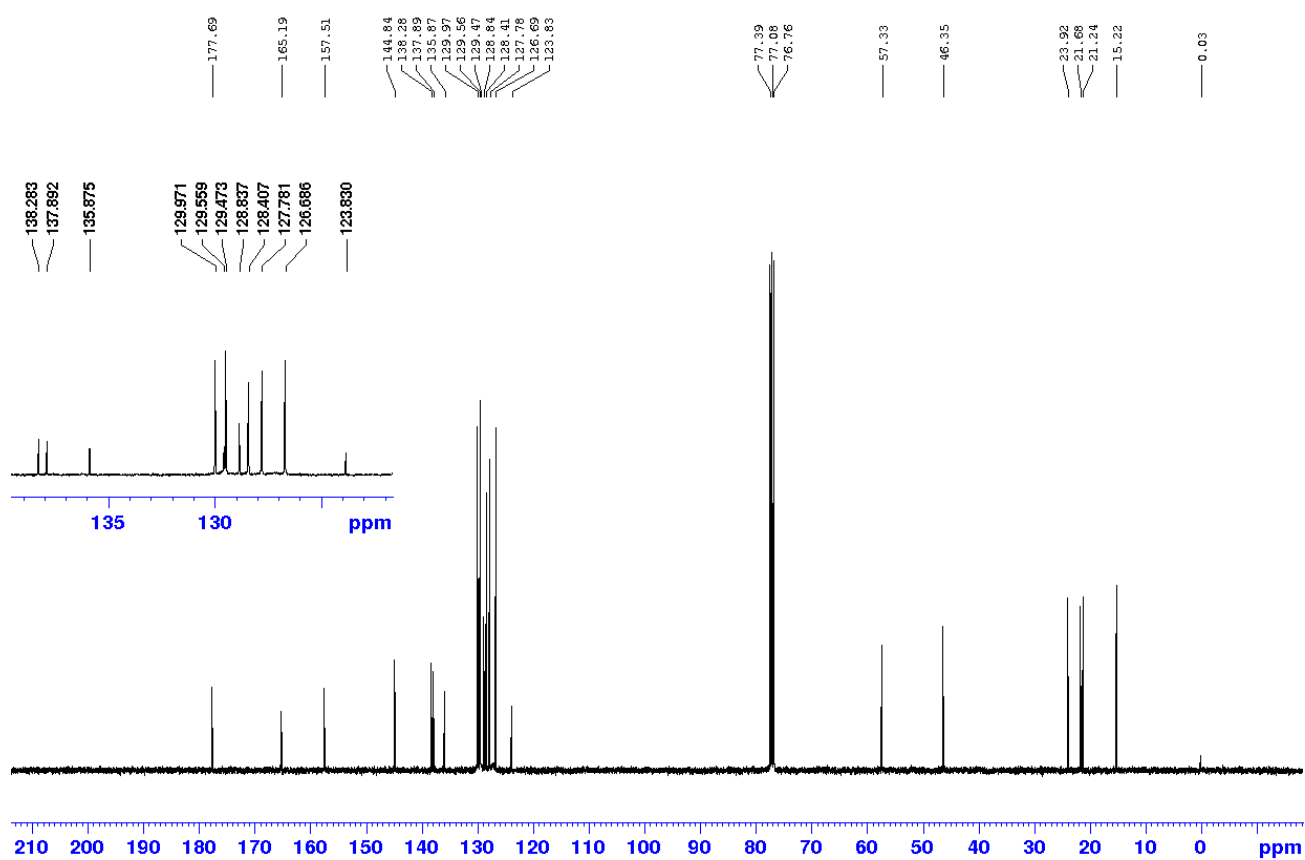



## HRMS Spectrum of 3cb

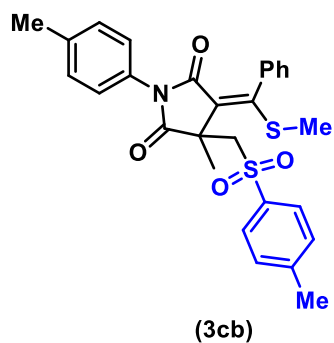

*(E)*-3-methyl-4-((methylthio)(phenyl)methylene)-1-(*p*-tolyl)-3-(tosylmethyl)pyrrolidine-2,5-dione

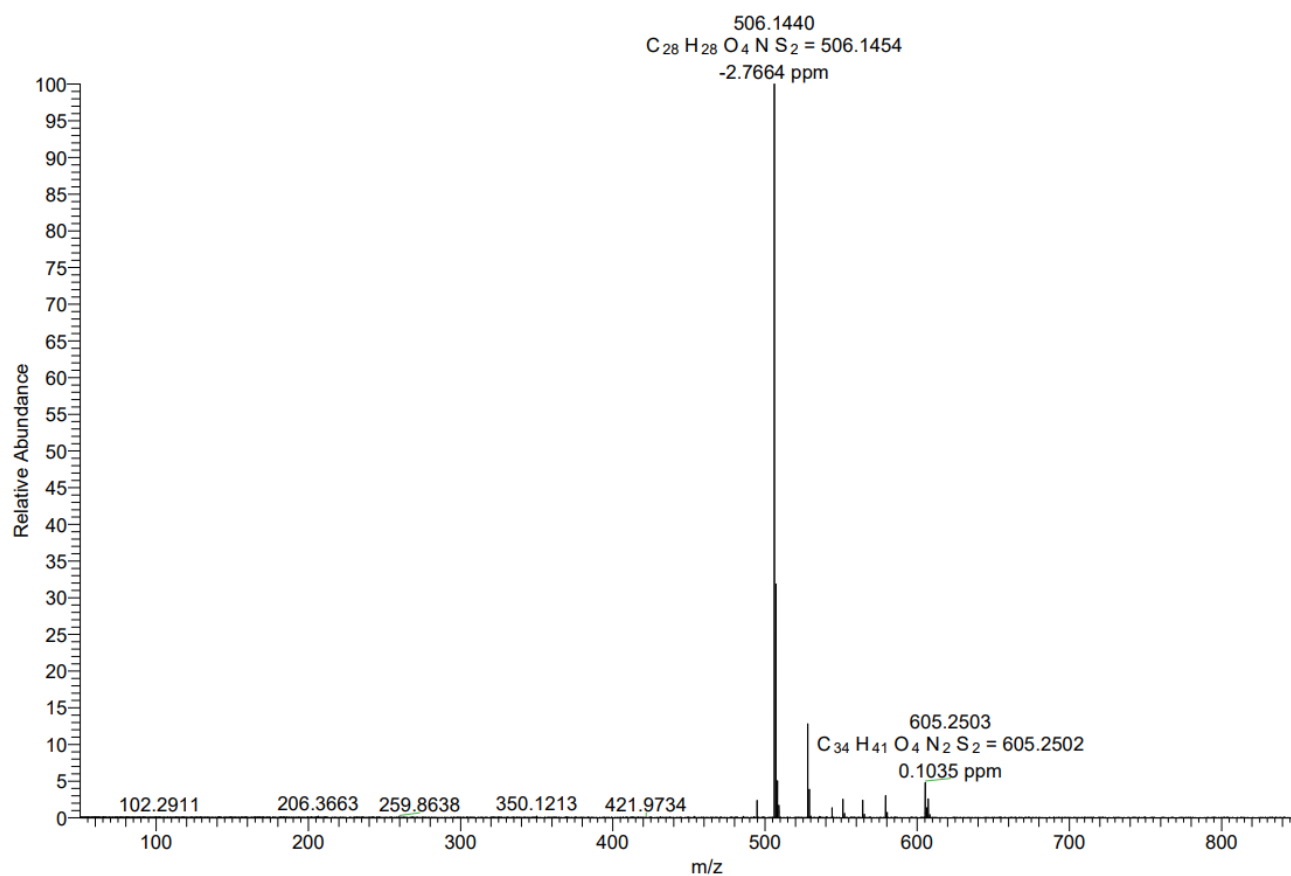

<sup>1</sup>H NMR spectrum of 3cc (400 MHz, CDCl<sub>3</sub>)

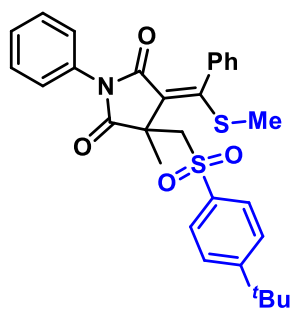

(3cc)

(E)-3-(((4-(*tert*-butyl)phenyl)sulfonyl)methyl)-3-methyl-4-((methylthio)(phenyl)methylene)-1-phenylpyrrolidine-2,5-dione

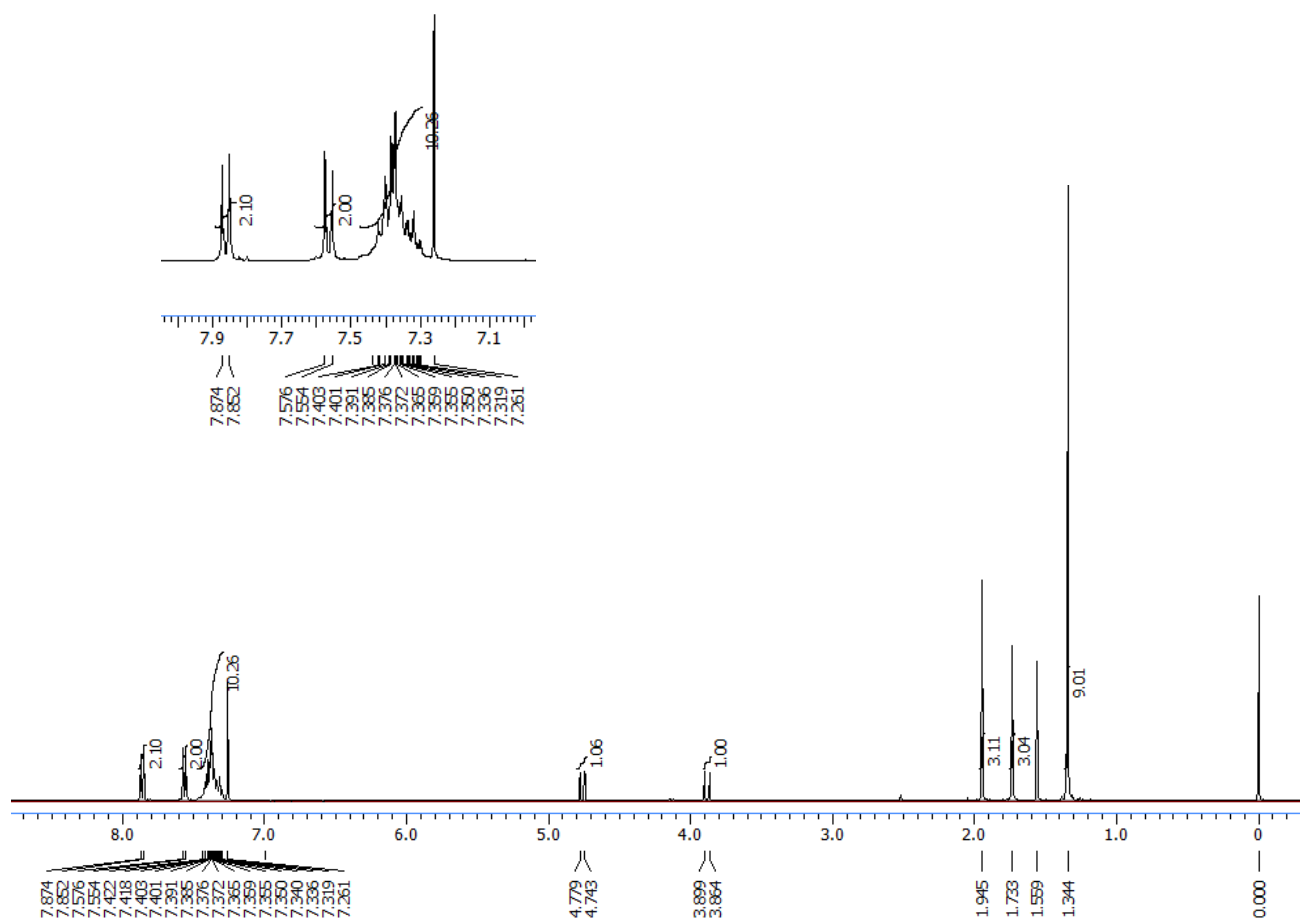

**<sup>13</sup>C NMR spectrum of 3cc (100 MHz, CDCl<sub>3</sub>)**

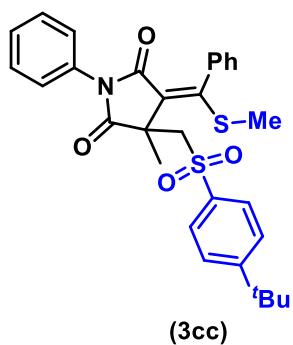

(E)-3-(((4-*tert*-butyl)phenyl)sulfonyl)methyl)-3-methyl-4-((methylthio)(phenyl)methylene)-1-phenylpyrrolidine-2,5-dione

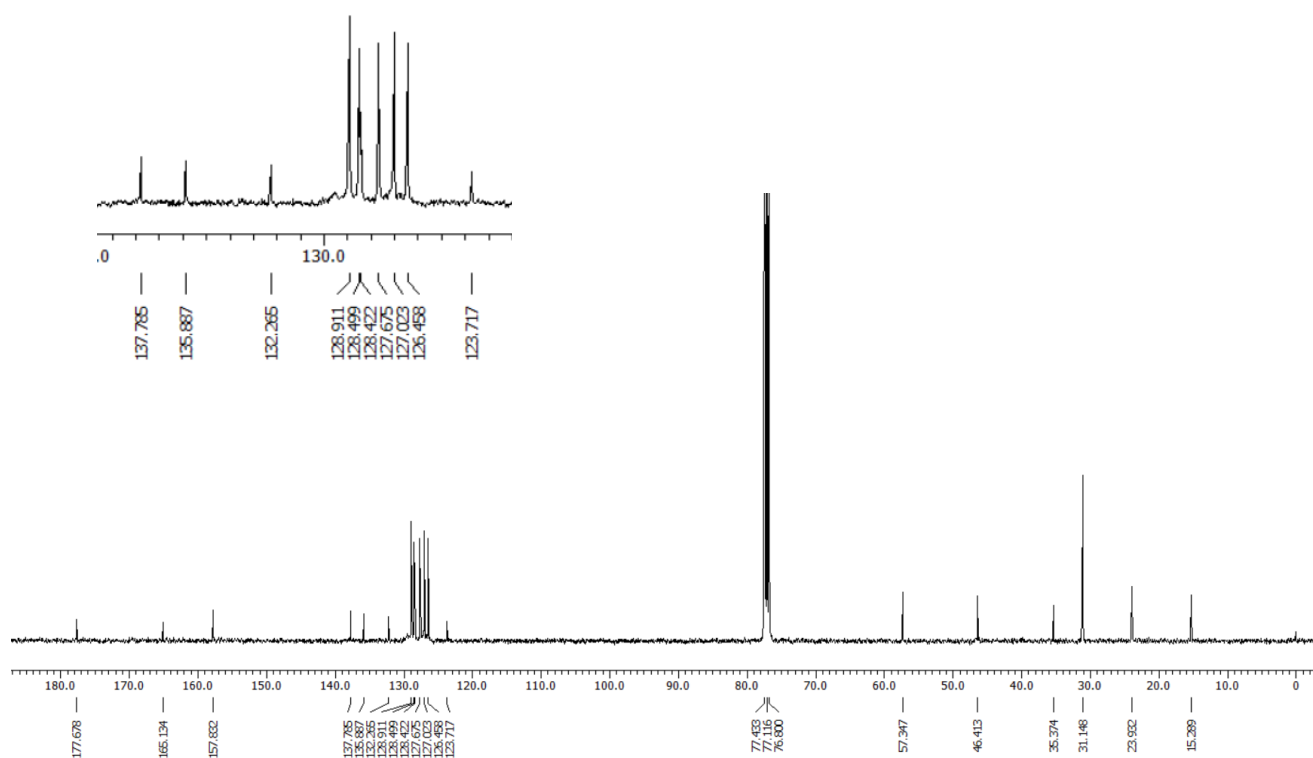

## HRMS spectrum of 3cc

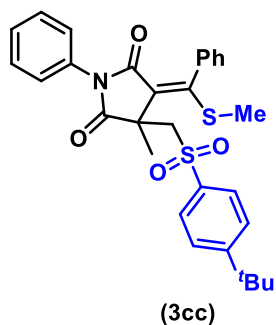

(E)-3-(((4-(tert-butyl)phenyl)sulfonyl)methyl)-3-methyl-4-((methylthio)(phenyl)methylene)-1-phenylpyrrolidine-2,5-dione

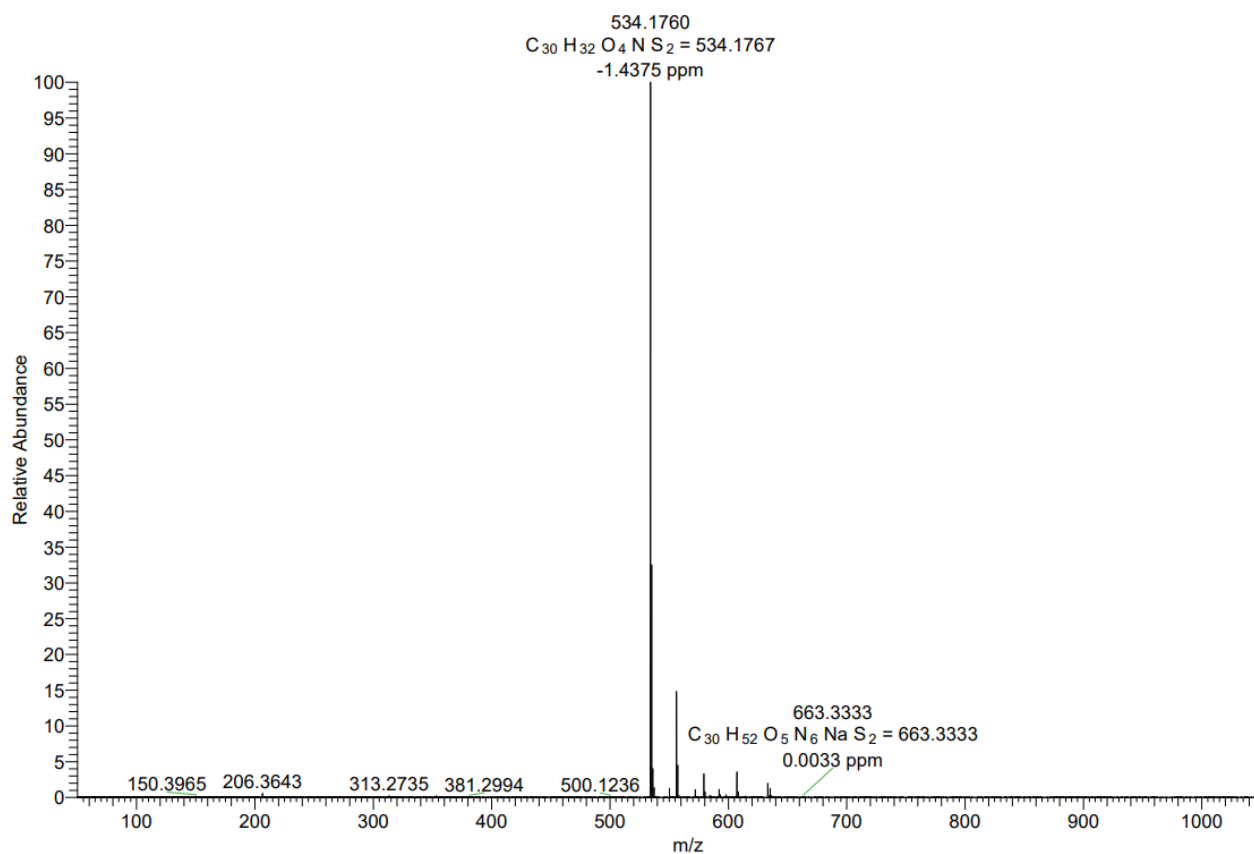

**<sup>1</sup>H NMR spectrum of 3cd (400 MHz, CDCl<sub>3</sub>)**

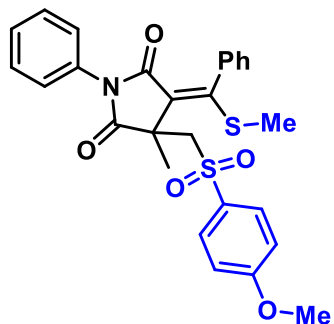

**(3cd)**

**(E)-3-(((4-methoxyphenyl)sulfonyl)methyl)-3-methyl-4-((methylthio)(phenyl)methylene)-1-phenylpyrrolidine-2,5-dione**

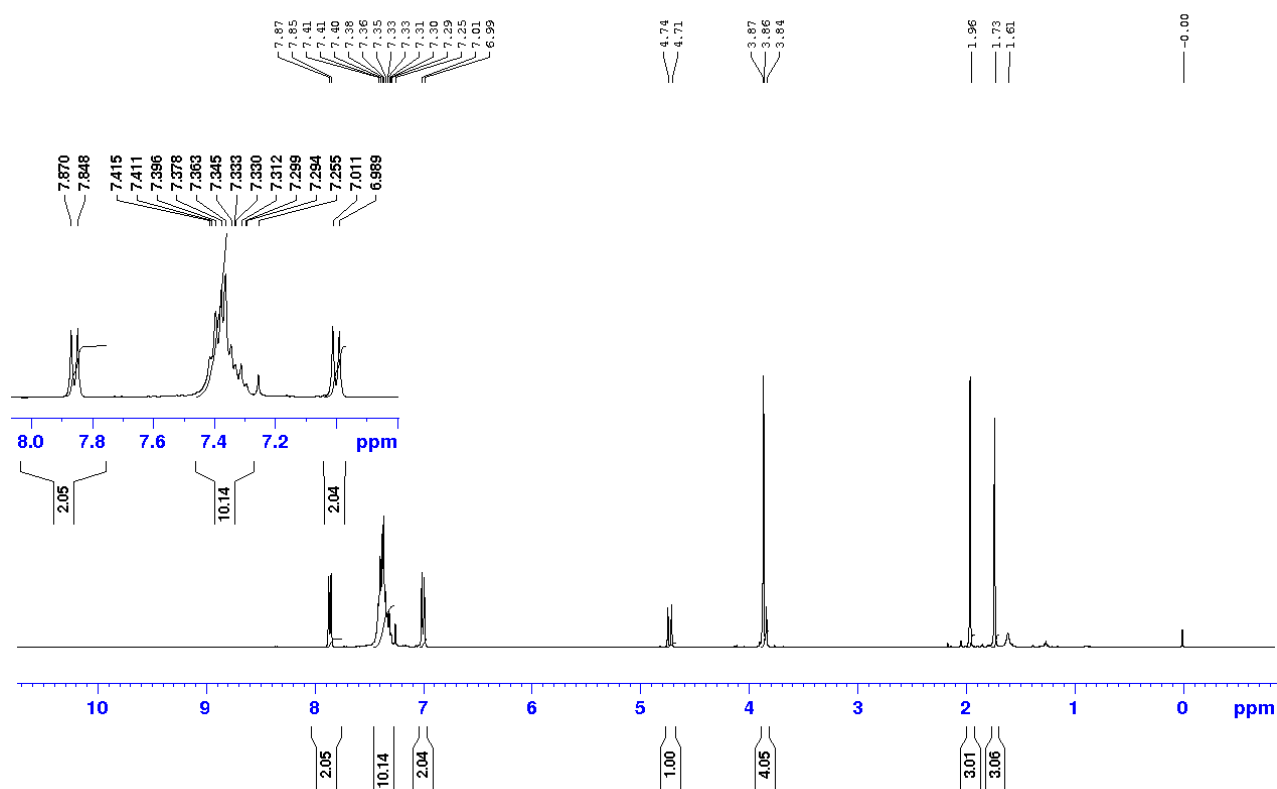

**<sup>13</sup>C NMR spectrum of 3cd (100 MHz, CDCl<sub>3</sub>)**

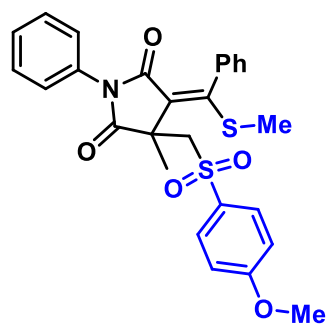

(3cd)

*(E)*-3-(((4-methoxyphenyl)sulfonyl)methyl)-3-methyl-4-((methylthio)(phenyl)methylene)-1-phenylpyrrolidine-2,5-dione

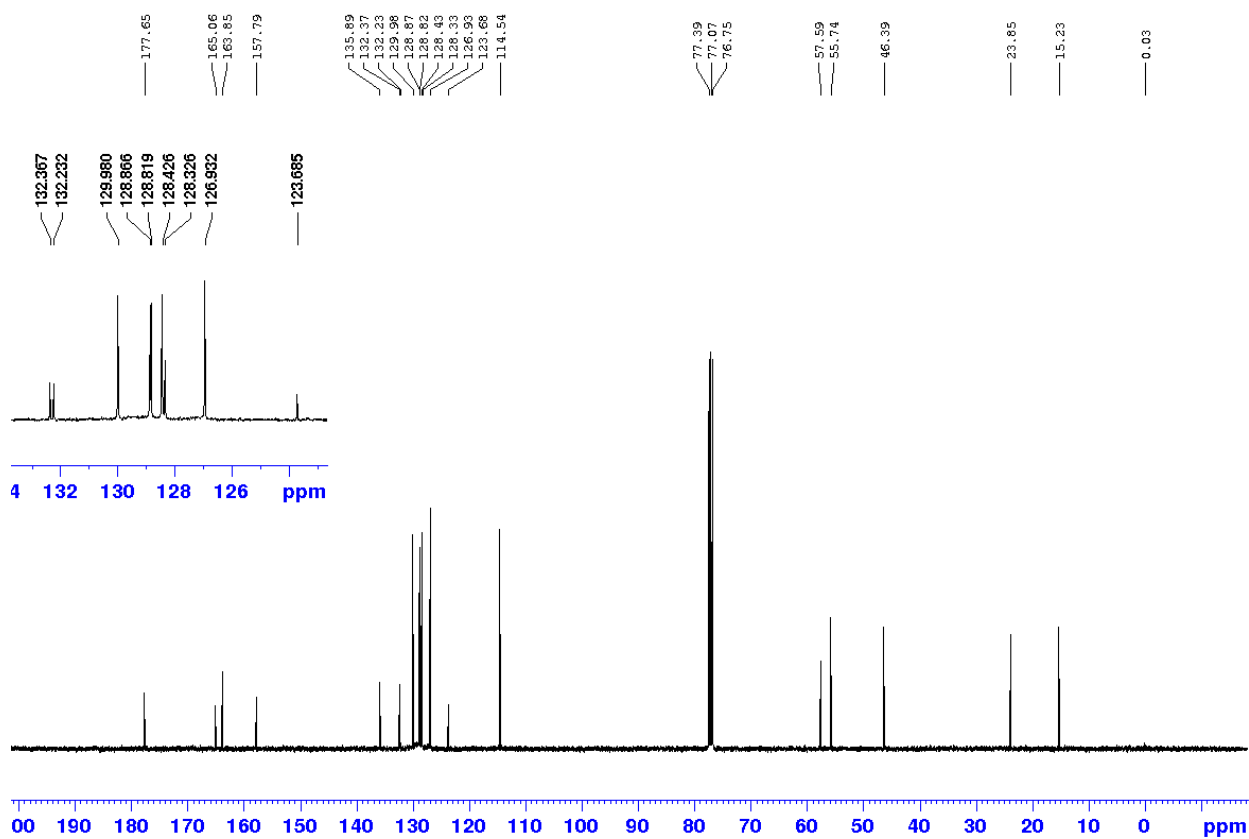

## HRMS spectrum of 3cd

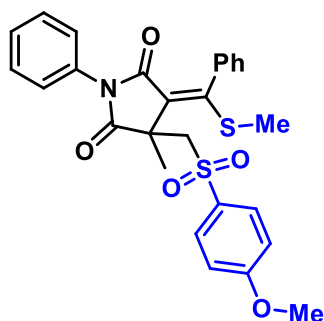

(3cd)

*(E)*-3-(((4-methoxyphenyl)sulfonyl)methyl)-3-methyl-4-((methylthio)(phenyl)methylene)-1-phenylpyrrolidine-2,5-dione

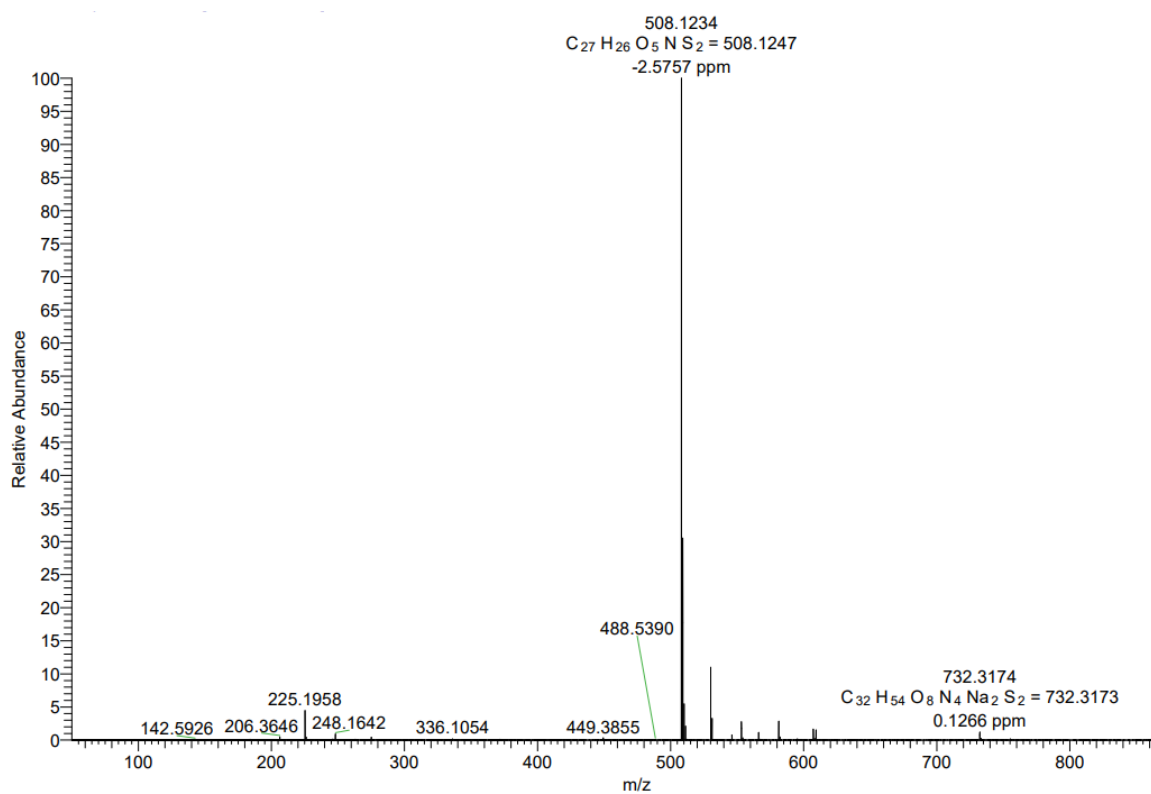

<sup>1</sup>H NMR spectrum of 3ce (400 MHz, CDCl<sub>3</sub>)

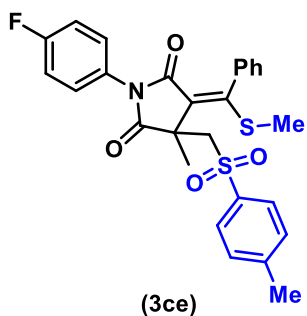

*(E)*-1-(4-fluorophenyl)-3-methyl-4-((methylthio)(phenyl)methylene)-3-(tosylmethyl)pyrrolidine-2,5-dione

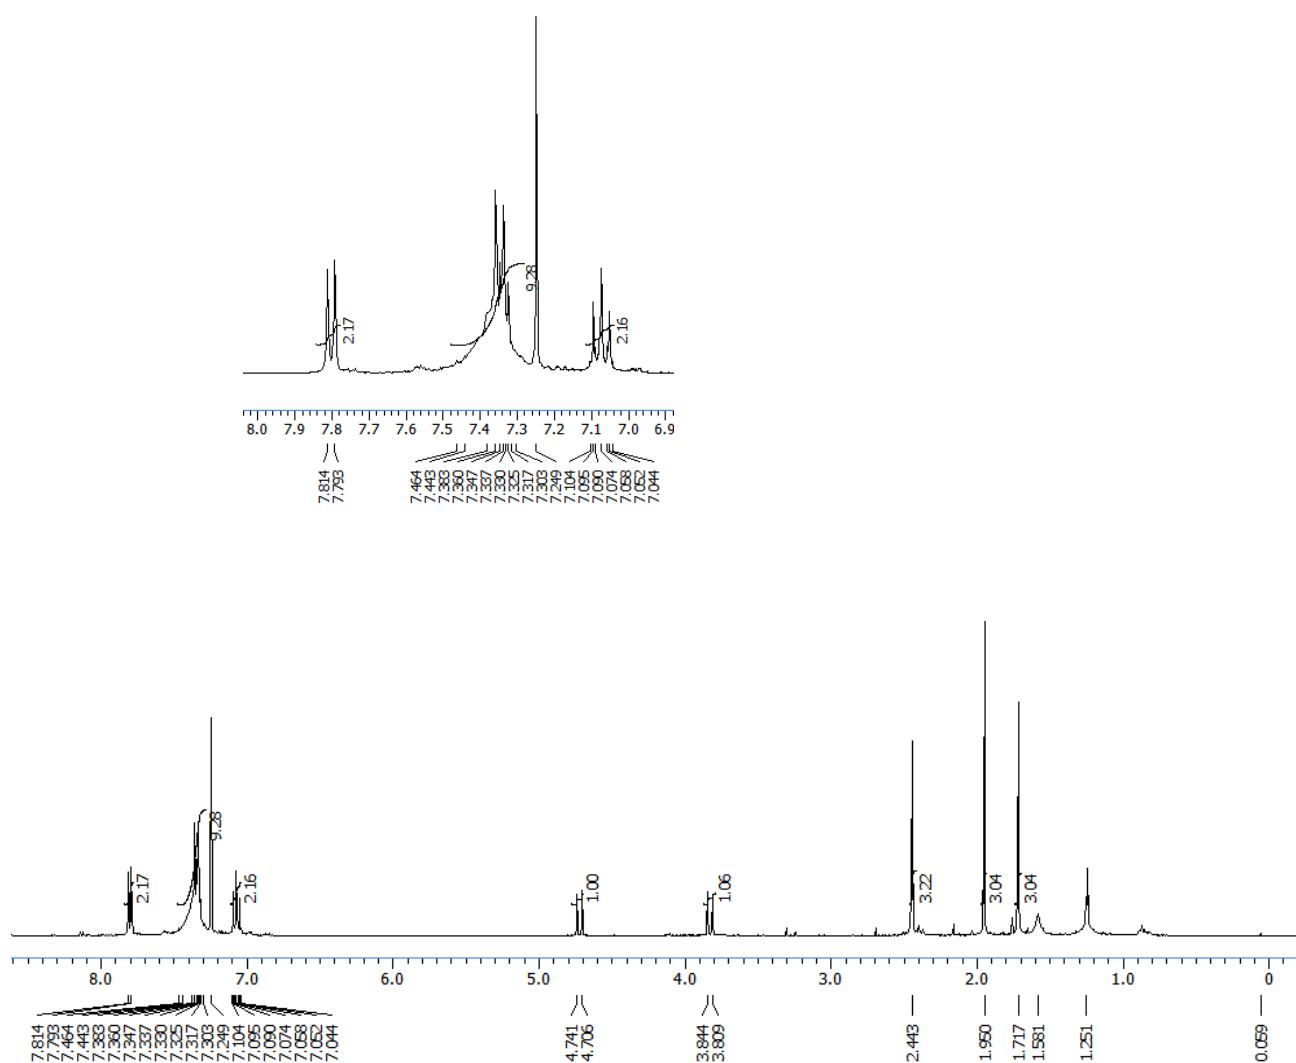



<sup>13</sup>C NMR spectrum of 3ce (100 MHz, CDCl<sub>3</sub>)

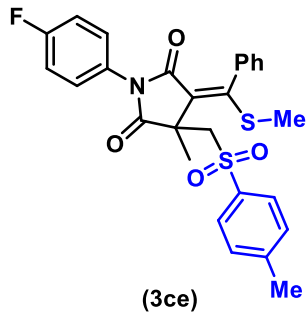

(E)-1-(4-fluorophenyl)-3-methyl-4-((methylthio)(phenyl)methylene)-3-(tosylmethyl)pyrrolidine-2,5-dione

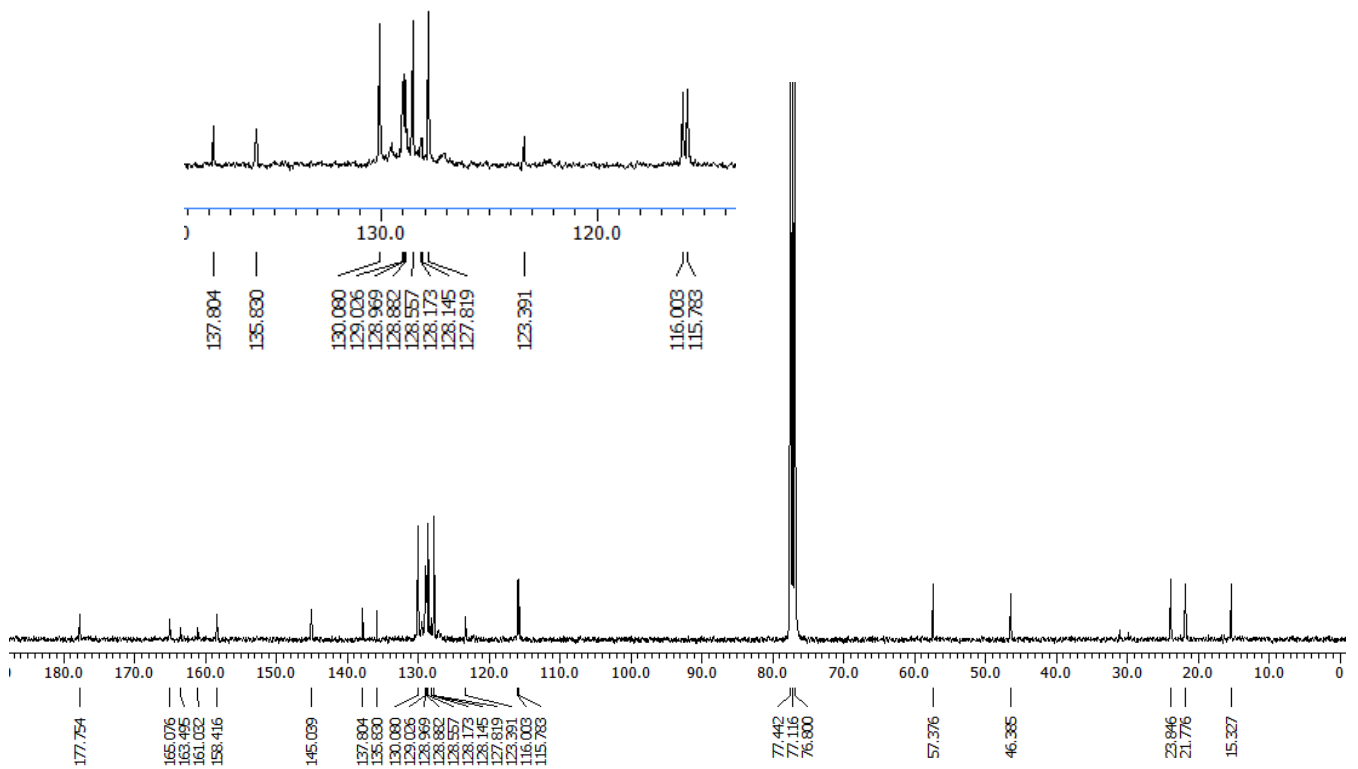

**<sup>19</sup>F NMR spectrum of 3ce (376 MHz, CDCl<sub>3</sub>)**



**(E)-1-(4-fluorophenyl)-3-methyl-4-((methylthio)(phenyl)methylene)-3-(tosylmethyl)pyrrolidine-2,5-dione**

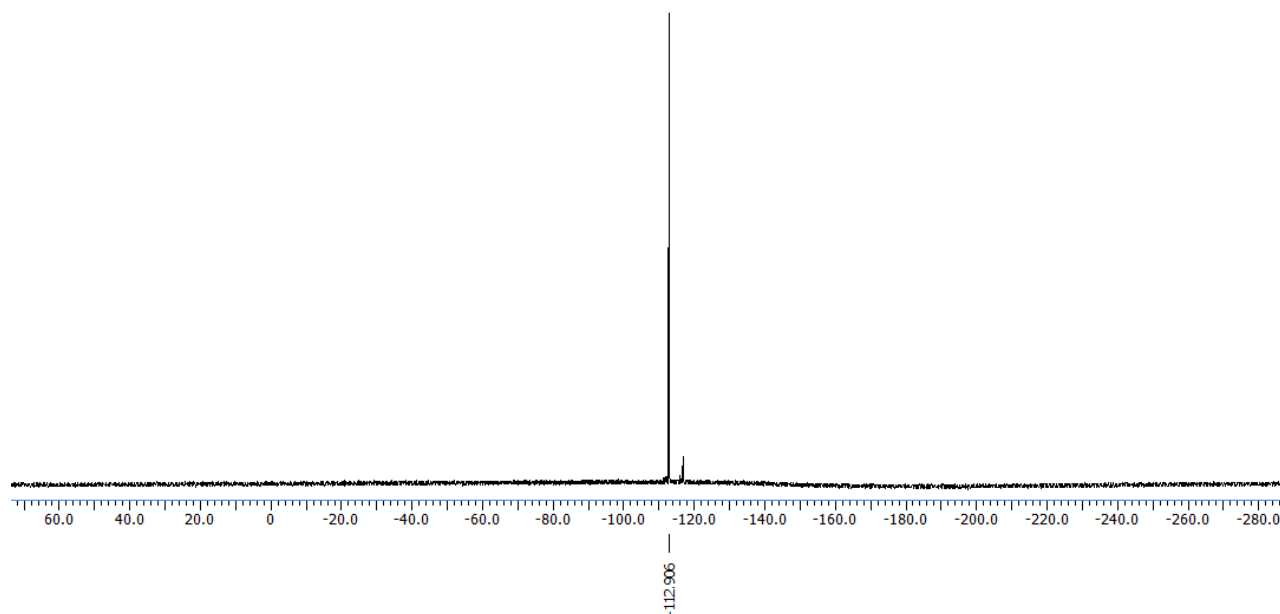

**HRMS spectrum of 3ce**

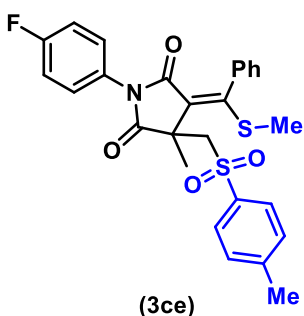

(E)-1-(4-fluorophenyl)-3-methyl-4-((methylthio)(phenyl)methylene)-3-(tosylmethyl)pyrrolidine-2,5-dione

### Qualitative Compound Report

|                        |              |               |                     |
|------------------------|--------------|---------------|---------------------|
| Data File              | SMP-35.d     | Sample Name   | SMP-35              |
| Sample Type            | Sample       | Position      | P1-B4               |
| Instrument Name        | Instrument 1 | User Name     |                     |
| Acq Method             | MS Scan.m    | Acquired Time | 21-05-2022 12:34:45 |
| IRM Calibration Status | Success      | DA Method     | Default.m           |
| Comment                |              |               |                     |

|                |                             |       |   |
|----------------|-----------------------------|-------|---|
| Sample Group   |                             | Info. | 3 |
| Acquisition SW | 6200 series TOF/6500 series |       |   |
| Version        | Q-TOF B.05.01 (B5125)       |       |   |

#### Compound Table

| Compound Label            | RT    | Mass     | Formula           | MFG Formula       | MFG Diff (ppm) | DB Formula        |
|---------------------------|-------|----------|-------------------|-------------------|----------------|-------------------|
| Cpd 15: C27 H24 F N O4 S2 | 0.174 | 509.1149 | C27 H24 F N O4 S2 | C27 H24 F N O4 S2 | -3.58          | C27 H24 F N O4 S2 |

| Compound Label            | m/z      | RT    | Algorithm                 | Mass     |
|---------------------------|----------|-------|---------------------------|----------|
| Cpd 15: C27 H24 F N O4 S2 | 510.1222 | 0.174 | Find by Molecular Feature | 509.1149 |

#### MFE MS Spectrum

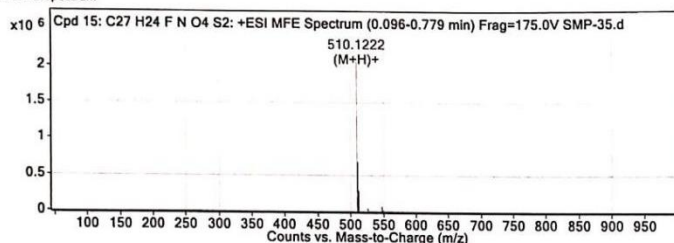

#### MFE MS Zoomed Spectrum

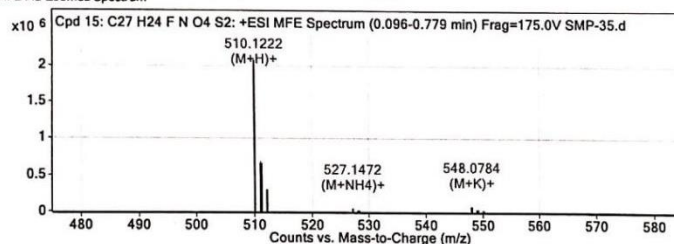

#### MS Spectrum Peak List

| m/z      | z | Abund     | Formula             | Ion      |
|----------|---|-----------|---------------------|----------|
| 510.1222 | 1 | 2075499.5 | C27 H25 F N O4 S2   | (M+H)+   |
| 511.1253 | 1 | 676911.62 | C27 H25 F N O4 S2   | (M+H)+   |
| 512.122  | 1 | 281590.88 | C27 H25 F N O4 S2   | (M+H)+   |
| 527.1472 | 1 | 34260.25  | C27 H28 F N2 O4 S2  | (M+NH4)+ |
| 528.1503 | 1 | 11413.7   | C27 H28 F N2 O4 S2  | (M+NH4)+ |
| 529.1345 | 1 | 5845.99   | C27 H28 F N2 O4 S2  | (M+NH4)+ |
| 548.0784 | 1 | 64579.69  | C27 H24 F K N O4 S2 | (M+K)+   |
| 549.0816 | 1 | 20421.02  | C27 H24 F K N O4 S2 | (M+K)+   |
| 550.0775 | 1 | 13670.2   | C27 H24 F K N O4 S2 | (M+K)+   |

<sup>1</sup>H NMR spectrum of 3cf (400 MHz, CDCl<sub>3</sub>)

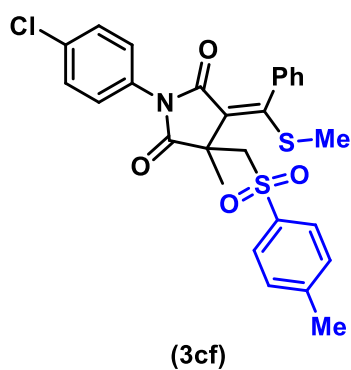

**(E)-1-(4-chlorophenyl)-3-methyl-4-((methylthio)(phenyl)methylene)-3-(tosylmethyl)pyrrolidine-2,5-dione**

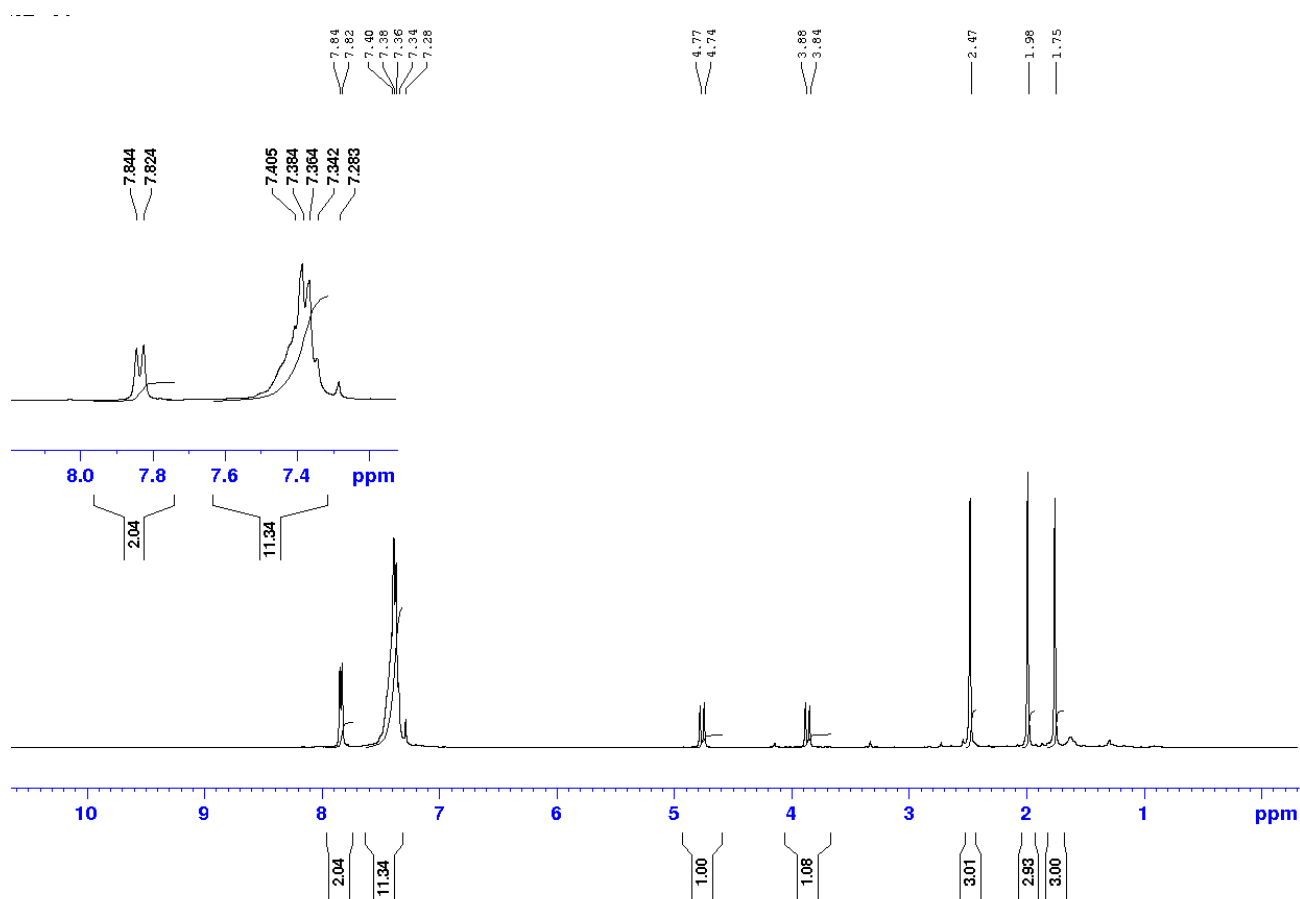

**<sup>13</sup>C NMR spectrum of 3cf (100 MHz, CDCl<sub>3</sub>)**



*(E)*-1-(4-chlorophenyl)-3-methyl-4-((methylthio)(phenyl)methylene)-3-(tosylmethyl)pyrrolidine-2,5-dione

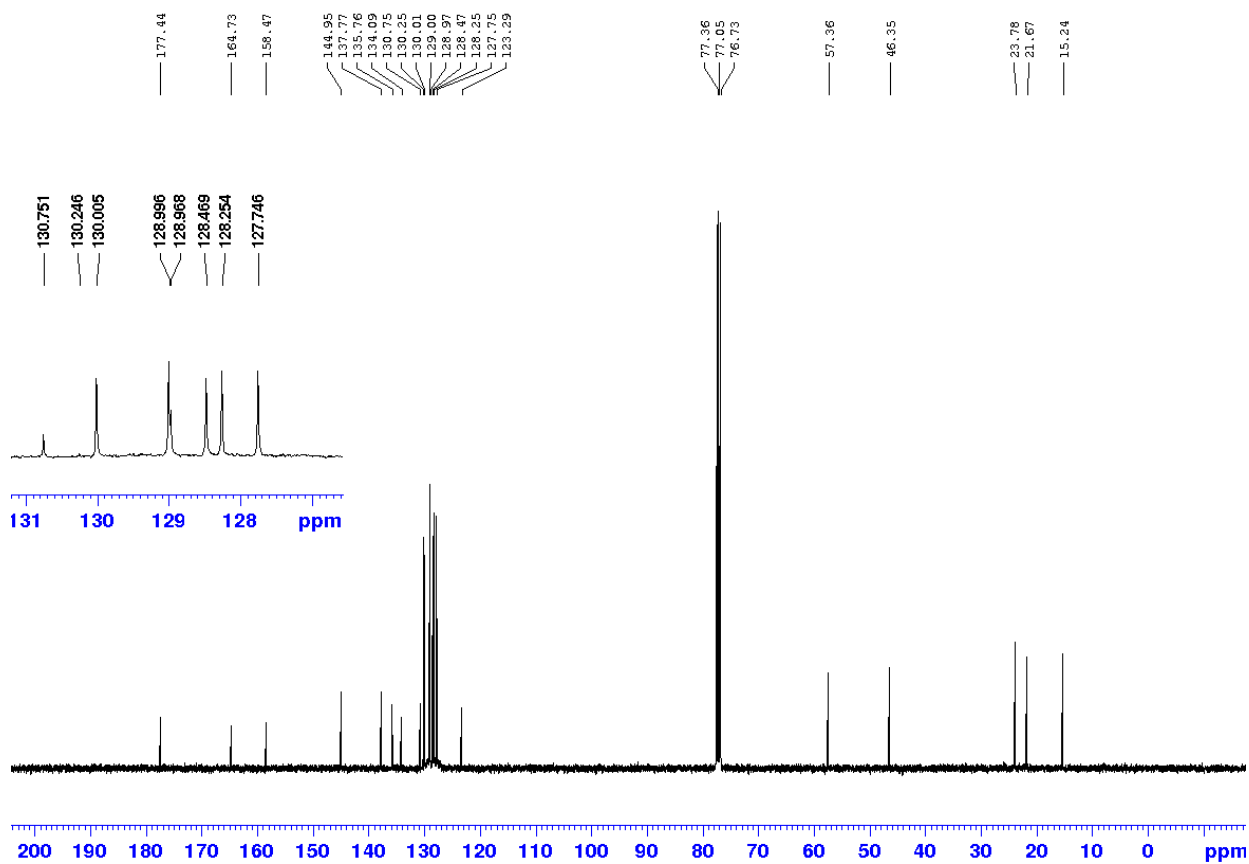

HRMS Spectrum of 3cf

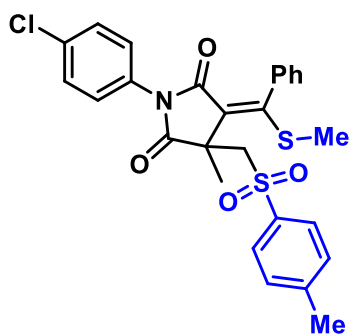

(3cf)

(E)-1-(4-chlorophenyl)-3-methyl-4-((methylthio)(phenyl)methylene)-3-(tosylmethyl)pyrrolidine-2,5-dione

### Qualitative Compound Report

Data File SMP-38.d Sample Name SMP-38  
 Sample Type Sample Position P1-A2  
 Instrument Name Instrument 1 User Name  
 Acq Method MS Scan.m Acquired Time 02-05-2022 11:33:53  
 IRM Calibration Status Success DA Method Default.m  
 Comment

Sample Group Info. 3  
 Acquisition SW 6200 series TOF/6500 series  
 Version Q-TOF B.05.01 (B5125)

| Compound Label             | RT    | Mass     | Formula            | MFG Formula        | MFG Diff (ppm) | DB Formula         |
|----------------------------|-------|----------|--------------------|--------------------|----------------|--------------------|
| Cpd 12: C27 H24 Cl N O4 S2 | 0.204 | 525.0844 | C27 H24 Cl N O4 S2 | C27 H24 Cl N O4 S2 | -1.59          | C27 H24 Cl N O4 S2 |

| Compound Label             | m/z      | RT    | Algorithm                 | Mass     |
|----------------------------|----------|-------|---------------------------|----------|
| Cpd 12: C27 H24 Cl N O4 S2 | 526.0921 | 0.204 | Find by Molecular Feature | 525.0844 |

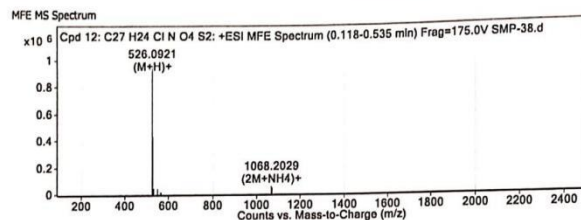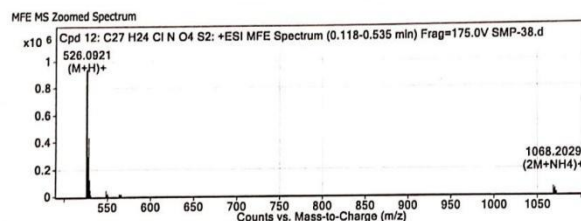

MS Spectrum Peak List

| m/z       | z | Abund     | Formula               | Ion       |
|-----------|---|-----------|-----------------------|-----------|
| 526.0921  | 1 | 945474    | C27 H25 Cl N O4 S2    | (M+H)+    |
| 527.0945  | 1 | 289422.15 | C27 H25 Cl N O4 S2    | (M+H)+    |
| 528.0891  | 1 | 435992.1  | C27 H25 Cl N O4 S2    | (M+H)+    |
| 529.0912  | 1 | 122322.96 | C27 H25 Cl N O4 S2    | (M+H)+    |
| 530.0872  | 1 | 46817.86  | C27 H25 Cl N O4 S2    | (M+H)+    |
| 548.0727  | 1 | 41863.77  | C27 H24 Cl N Na O4 S2 | (M+Na)+   |
| 1068.2029 | 1 | 55452.15  |                       | (2M+NH4)+ |
| 1069.2036 | 1 | 34503.22  |                       | (2M+NH4)+ |
| 1070.1992 | 1 | 45095.06  |                       | (2M+NH4)+ |
| 1071.2013 | 1 | 24920.92  |                       | (2M+NH4)+ |

<sup>1</sup>H NMR spectrum of 3cg (400 MHz, CDCl<sub>3</sub>)

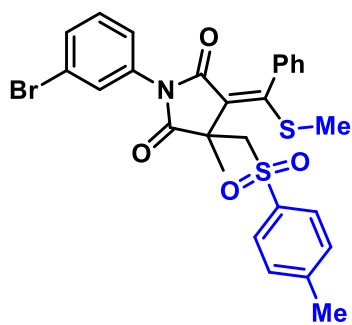

(3cg)

**(E)-1-(3-bromophenyl)-3-methyl-4-((methylthio)(phenyl)methylene)-3-(tosylmethyl)pyrrolidine-2,5-dione**

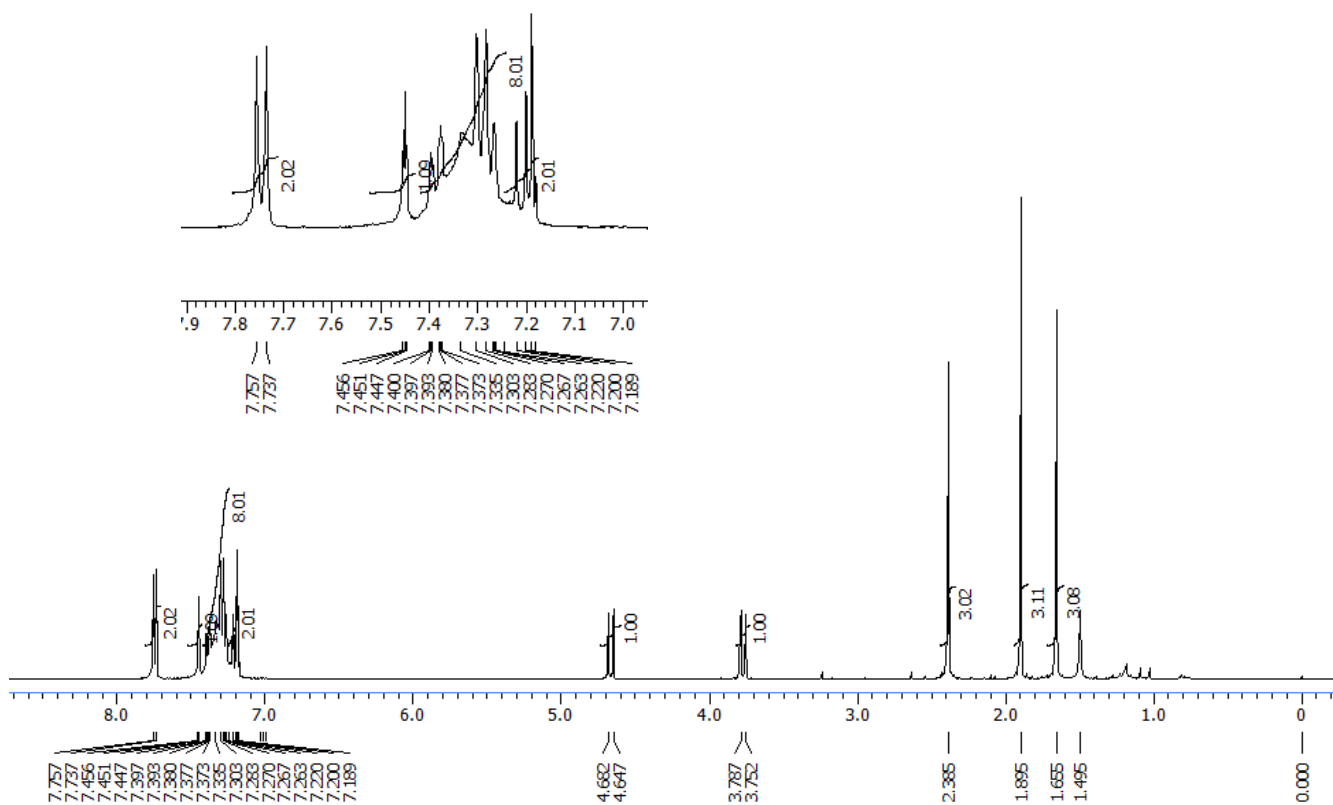

**<sup>13</sup>C NMR spectrum of 3cg (100 MHz, CDCl<sub>3</sub>)**

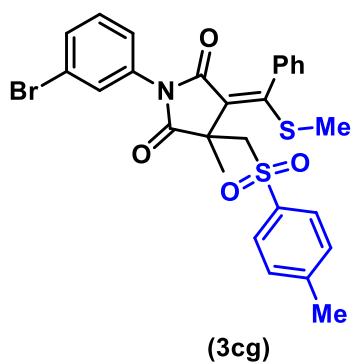

**(E)-1-(3-bromophenyl)-3-methyl-4-((methylthio)(phenyl)methylene)-3-(tosylmethyl)pyrrolidine-2,5-dione**

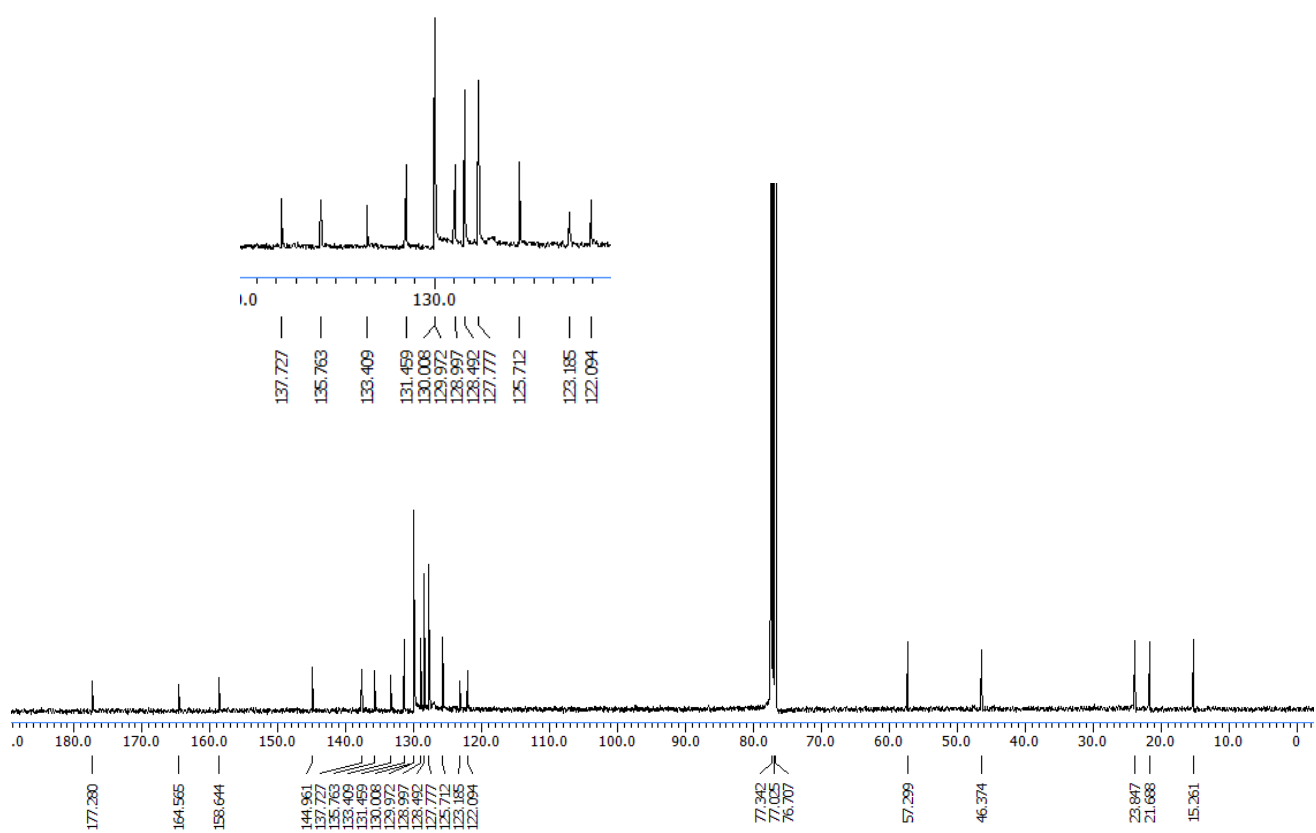

**HRMS Spectrum of 3cg**



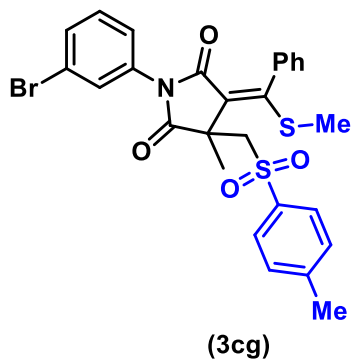

(E)-1-(3-bromophenyl)-3-methyl-4-((methylthio)(phenyl)methylene)-3-(tosylmethyl)pyrrolidine-2,5-dione

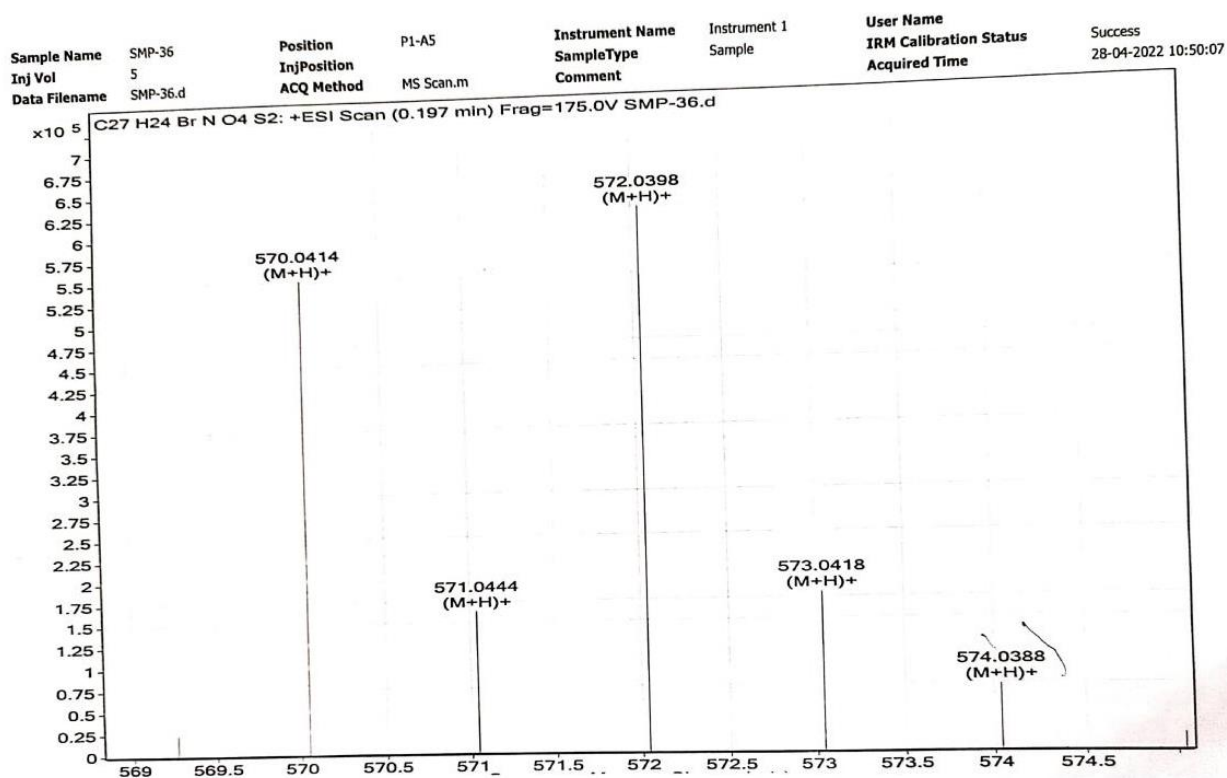

<sup>1</sup>H NMR spectrum of 3ch (400 MHz, CDCl<sub>3</sub>)

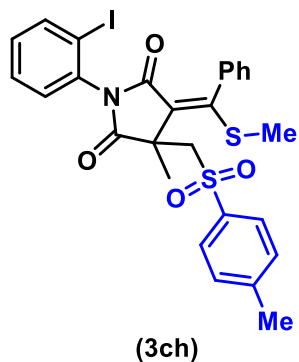

**(E)-1-(2-iodophenyl)-3-methyl-4-((methylthio)(phenyl)methylene)-3-(tosylmethyl)pyrrolidine-2,5-dione**

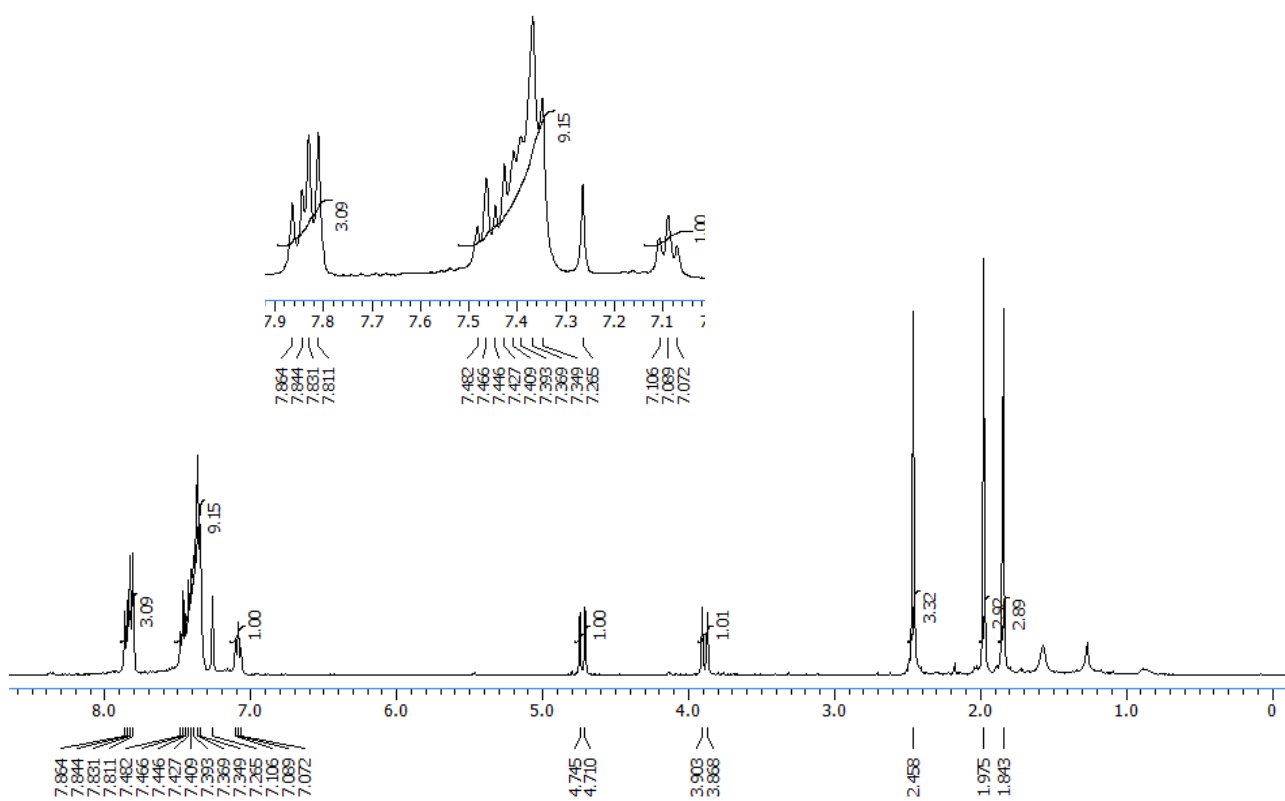

**<sup>13</sup>C NMR spectrum of 3ch (100 MHz, CDCl<sub>3</sub>)**

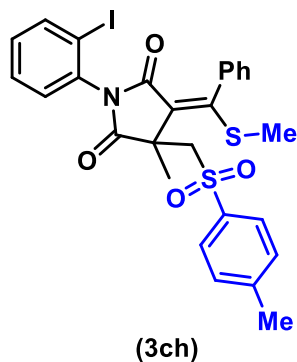

**(E)-1-(2-iodophenyl)-3-methyl-4-((methylthio)(phenyl)methylene)-3-(tosylmethyl)pyrrolidine-2,5-dione**

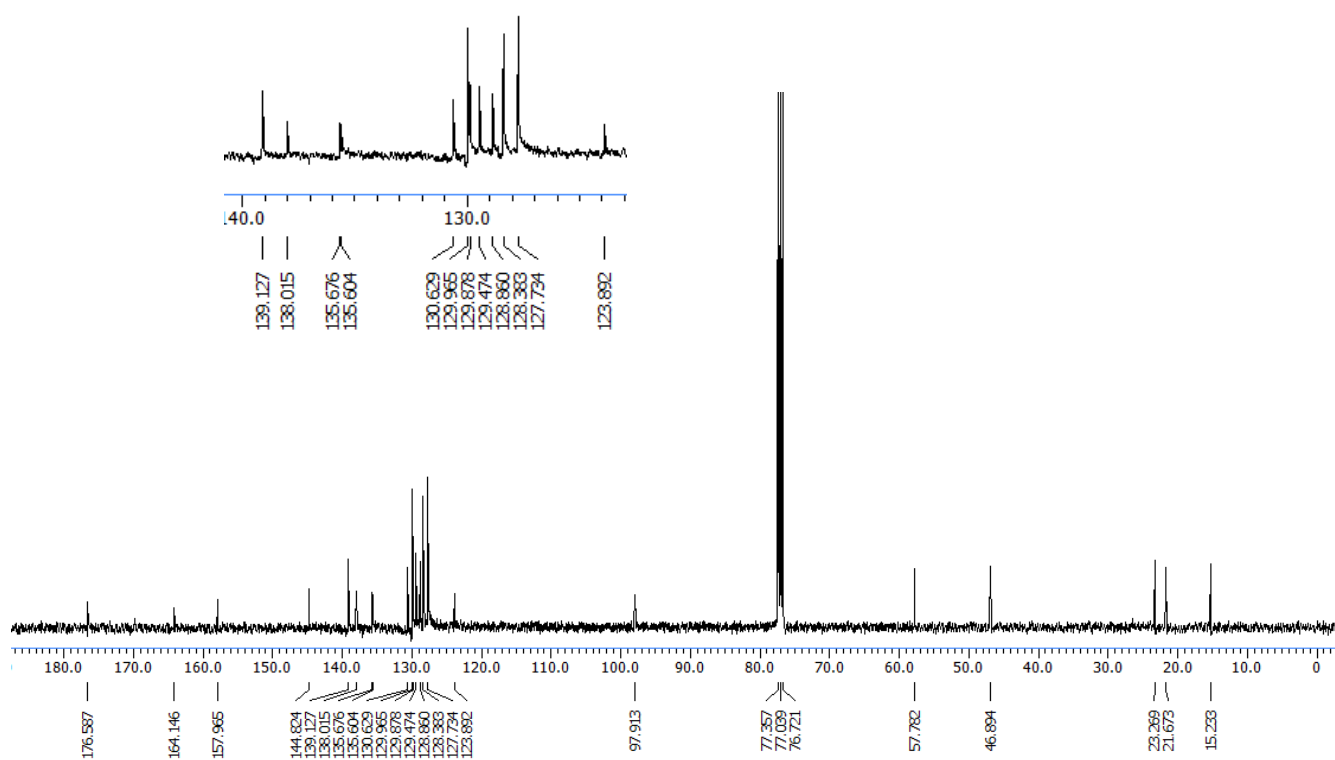

**HRMS Spectrum of 3ch**

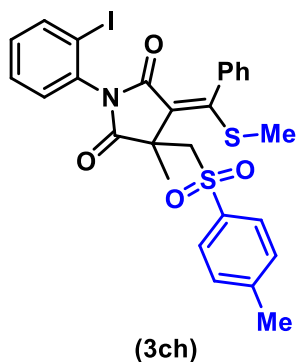

(E)-1-(2-iodophenyl)-3-methyl-4-((methylthio)(phenyl)methylene)-3-(tosylmethyl)pyrrolidine-2,5-dione

### Qualitative Compound Report

|                               |                             |                      |                     |
|-------------------------------|-----------------------------|----------------------|---------------------|
| <b>Data File</b>              | SMP-25.d                    | <b>Sample Name</b>   | SMP-25              |
| <b>Sample Type</b>            | Sample                      | <b>Position</b>      | P1-A9               |
| <b>Instrument Name</b>        | Instrument 1                | <b>User Name</b>     |                     |
| <b>Acq Method</b>             | MS Scan.m                   | <b>Acquired Time</b> | 21-05-2022 12:28:47 |
| <b>IRM Calibration Status</b> | Success                     | <b>DA Method</b>     | Default.m           |
| <b>Comment</b>                |                             |                      |                     |
| <b>Sample Group</b>           |                             | <b>Info.</b>         | 3                   |
| <b>Acquisition SW</b>         | 6200 series TOF/6500 series |                      |                     |
| <b>Version</b>                | Q-TOF B.05.01 (B5125)       |                      |                     |

#### Compound Table

| Compound Label          | RT    | Mass     | Formula         | MFG Formula     | MFG Diff (ppm) | DB Formula      |
|-------------------------|-------|----------|-----------------|-----------------|----------------|-----------------|
| Cpd 16: C29 H23 N O4 S3 | 0.185 | 545.0804 | C29 H23 N O4 S3 | C29 H23 N O4 S3 | -2.8           | C29 H23 N O4 S3 |

| Compound Label          | m/z      | RT    | Algorithm                 | Mass     |
|-------------------------|----------|-------|---------------------------|----------|
| Cpd 16: C29 H23 N O4 S3 | 546.0879 | 0.185 | Find by Molecular Feature | 545.0804 |

#### MFE MS Spectrum

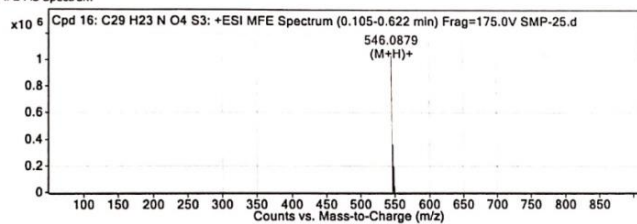

#### MFE MS Zoomed Spectrum

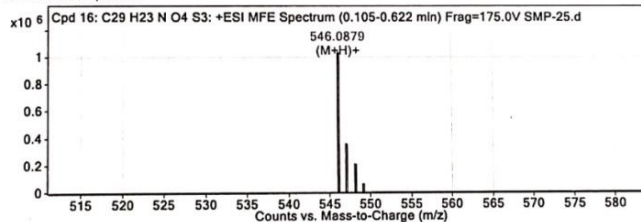

#### MS Spectrum Peak List

| m/z      | z | Abund      | Formula         | Ion    |
|----------|---|------------|-----------------|--------|
| 546.0879 | 1 | 1044326.25 | C29 H24 N O4 S3 | (M+H)+ |
| 547.0905 | 1 | 361133.85  | C29 H24 N O4 S3 | (M+H)+ |
| 548.0866 | 1 | 196223.48  | C29 H24 N O4 S3 | (M+H)+ |
| 549.0876 | 1 | 48562.02   | C29 H24 N O4 S3 | (M+H)+ |

<sup>1</sup>H NMR spectrum of 3ci (400 MHz, CDCl<sub>3</sub>)

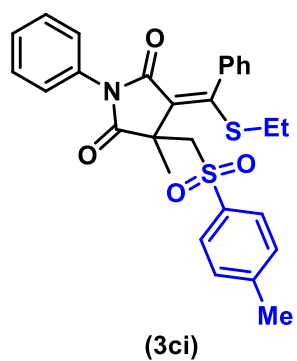

**(E)-4-((ethylthio)(phenyl)methylene)-3-methyl-1-phenyl-3-(tosylmethyl)pyrrolidine-2,5-dione**

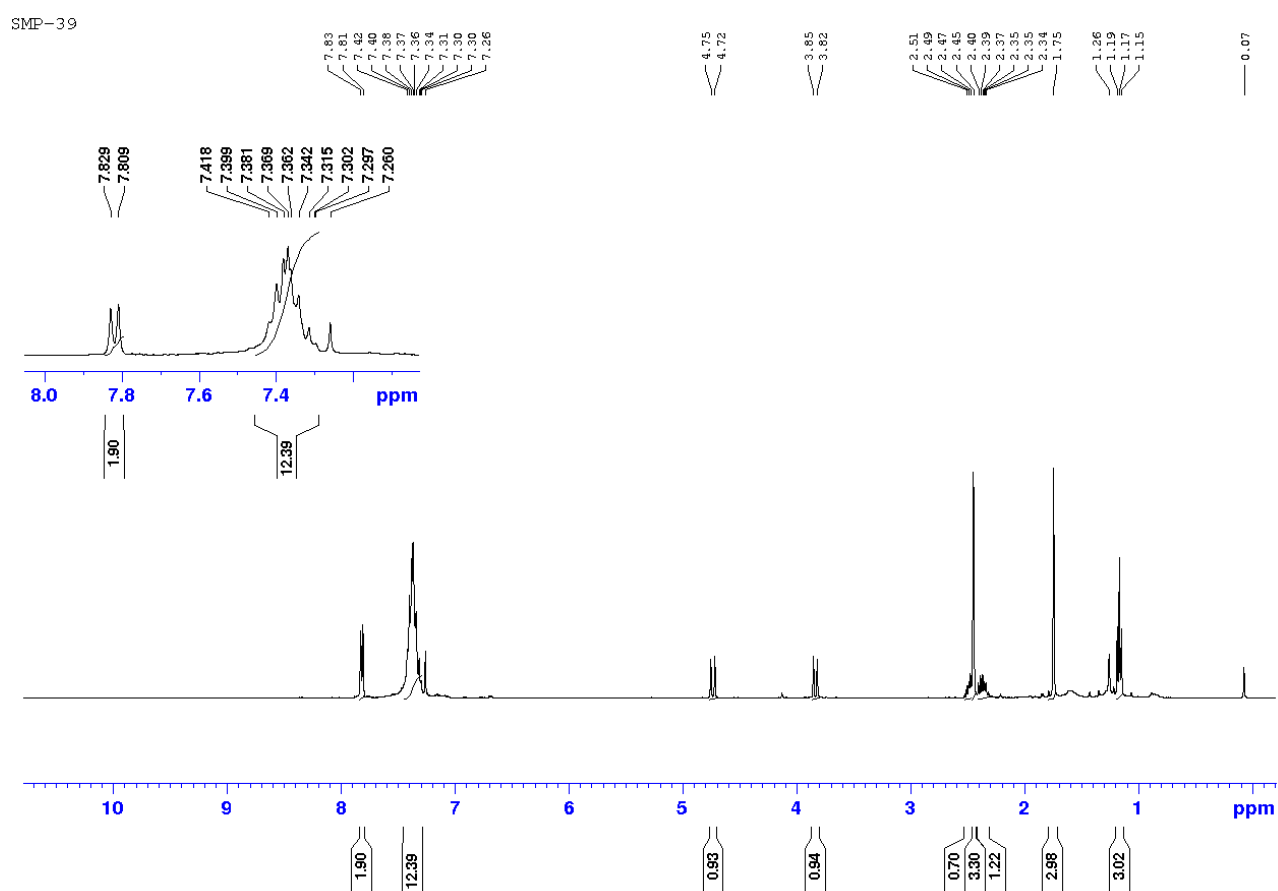

**$^{13}\text{C}$  NMR spectrum of 3ci (100 MHz,  $\text{CDCl}_3$ )**

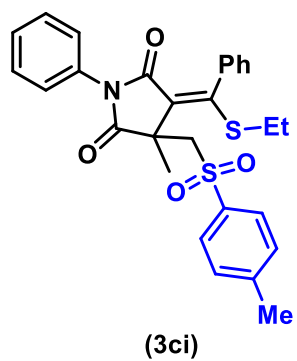

**(E)-4-((ethylthio)(phenyl)methylene)-3-methyl-1-phenyl-3-(tosylmethyl)pyrrolidine-2,5-dione**

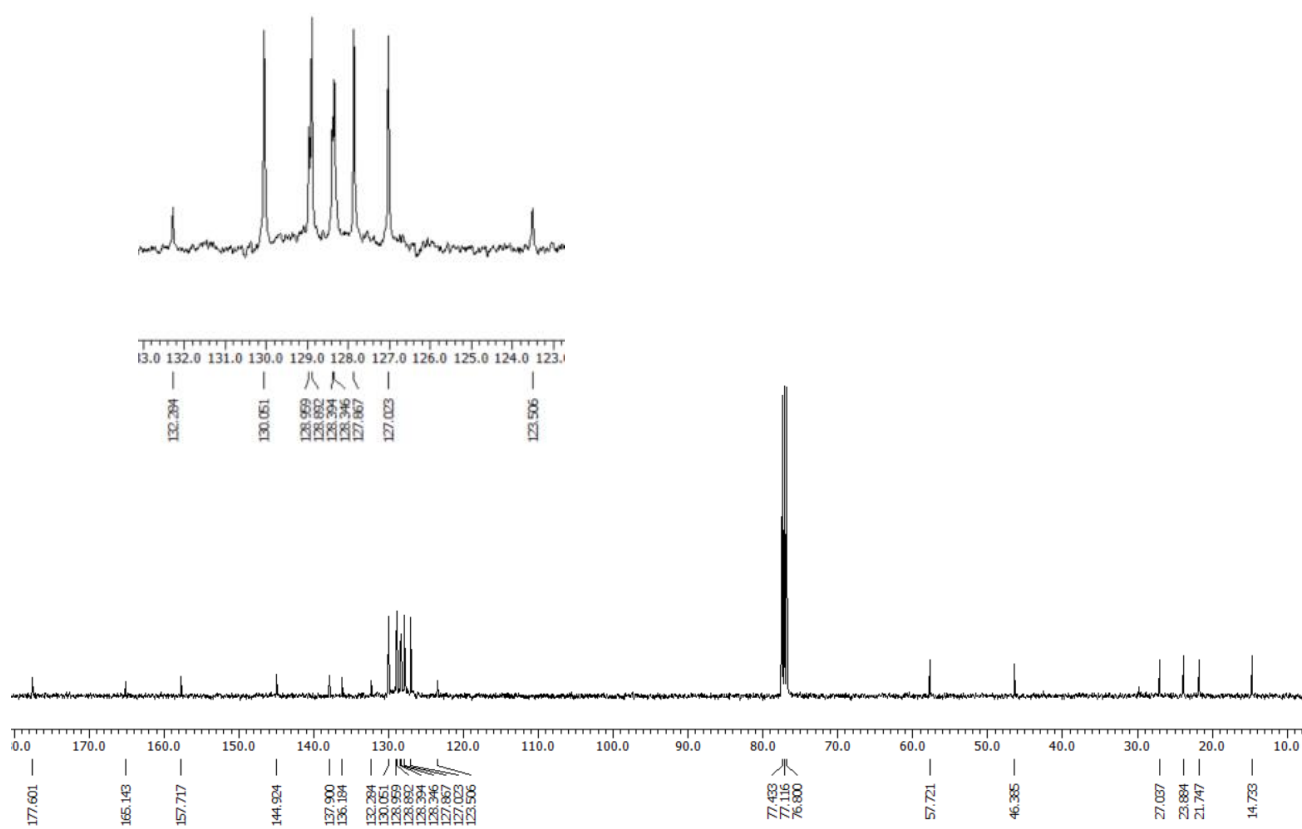

**HRMS Spectrum of 3ci**

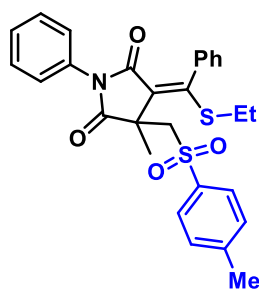

(3ci)

(E)-4-((ethylthio)(phenyl)methylene)-3-methyl-1-phenyl-3-(tosylmethyl)pyrrolidine-2,5-dione

### Qualitative Compound Report

|                        |              |               |                     |
|------------------------|--------------|---------------|---------------------|
| Data File              | SMP-39.d     | Sample Name   | SMP-39              |
| Sample Type            | Sample       | Position      | P1-B4               |
| Instrument Name        | Instrument 1 | User Name     |                     |
| Acq Method             | MS Scan.m    | Acquired Time | 02-05-2022 11:52:57 |
| IRM Calibration Status | Success      | DA Method     | Default.m           |
| Comment                |              |               |                     |

|                |                             |       |   |
|----------------|-----------------------------|-------|---|
| Sample Group   |                             | Info. | 3 |
| Acquisition SW | 6200 series TOF/6500 series |       |   |
| Version        | Q-TOF 8.05.01 (85125)       |       |   |

#### Compound Table

| Compound Label         | RT    | Mass     | Formula         | MFG Formula     | MFG Diff (ppm) | DB Formula      |
|------------------------|-------|----------|-----------------|-----------------|----------------|-----------------|
| Cpd 8: C28 H27 N O4 S2 | 0.203 | 505.1386 | C28 H27 N O4 S2 | C28 H27 N O4 S2 | -0.88          | C28 H27 N O4 S2 |

| Compound Label         | m/z     | RT    | Algorithm                 | Mass     |
|------------------------|---------|-------|---------------------------|----------|
| Cpd 8: C28 H27 N O4 S2 | 506.146 | 0.203 | Find by Molecular Feature | 505.1386 |

#### MFE MS Spectrum

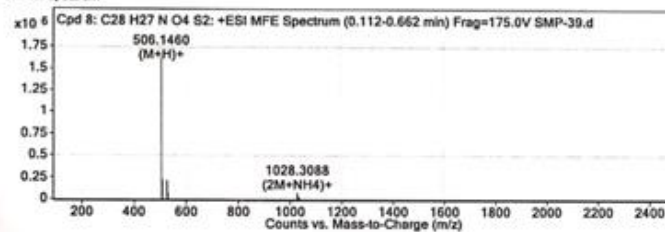

#### MFE MS Zoomed Spectrum

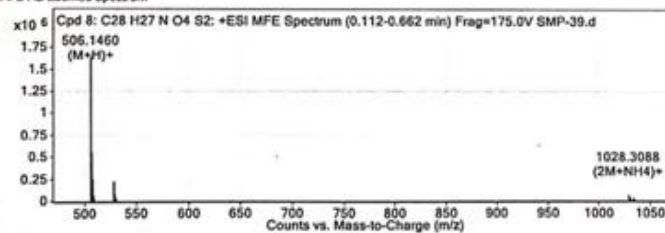

#### MS Spectrum Peak List

| m/z       | z | Abund      | Formula            | Ion       |
|-----------|---|------------|--------------------|-----------|
| 506.146   | 1 | 1647364.88 | C28 H28 N O4 S2    | (M+H)+    |
| 507.1489  | 1 | 552643.44  | C28 H28 N O4 S2    | (M+H)+    |
| 508.1456  | 1 | 229932.73  | C28 H28 N O4 S2    | (M+H)+    |
| 509.1464  | 1 | 54355.69   | C28 H28 N O4 S2    | (M+H)+    |
| 528.1275  | 1 | 219427.52  | C28 H27 N Na O4 S2 | (M+Na)+   |
| 529.1302  | 1 | 69987.47   | C28 H27 N Na O4 S2 | (M+Na)+   |
| 530.1267  | 1 | 31822.63   | C28 H27 N Na O4 S2 | (M+Na)+   |
| 1028.3088 | 1 | 67389.03   |                    | (2M+NH4)+ |
| 1029.3116 | 1 | 45486.52   |                    | (2M+NH4)+ |
| 1033.267  | 1 | 32111.34   |                    | (2M+Na)+  |

<sup>1</sup>H NMR spectrum of 3cj (400 MHz, CDCl<sub>3</sub>)

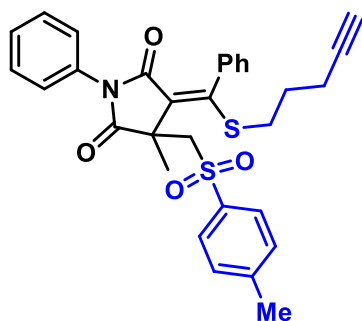

(3cj)

(*E*)-3-methyl-4-((pent-4-yn-1-ylthio)(phenyl)methylene)-1-phenyl-3-(tosylmethyl)pyrrolidine-2,5-dione

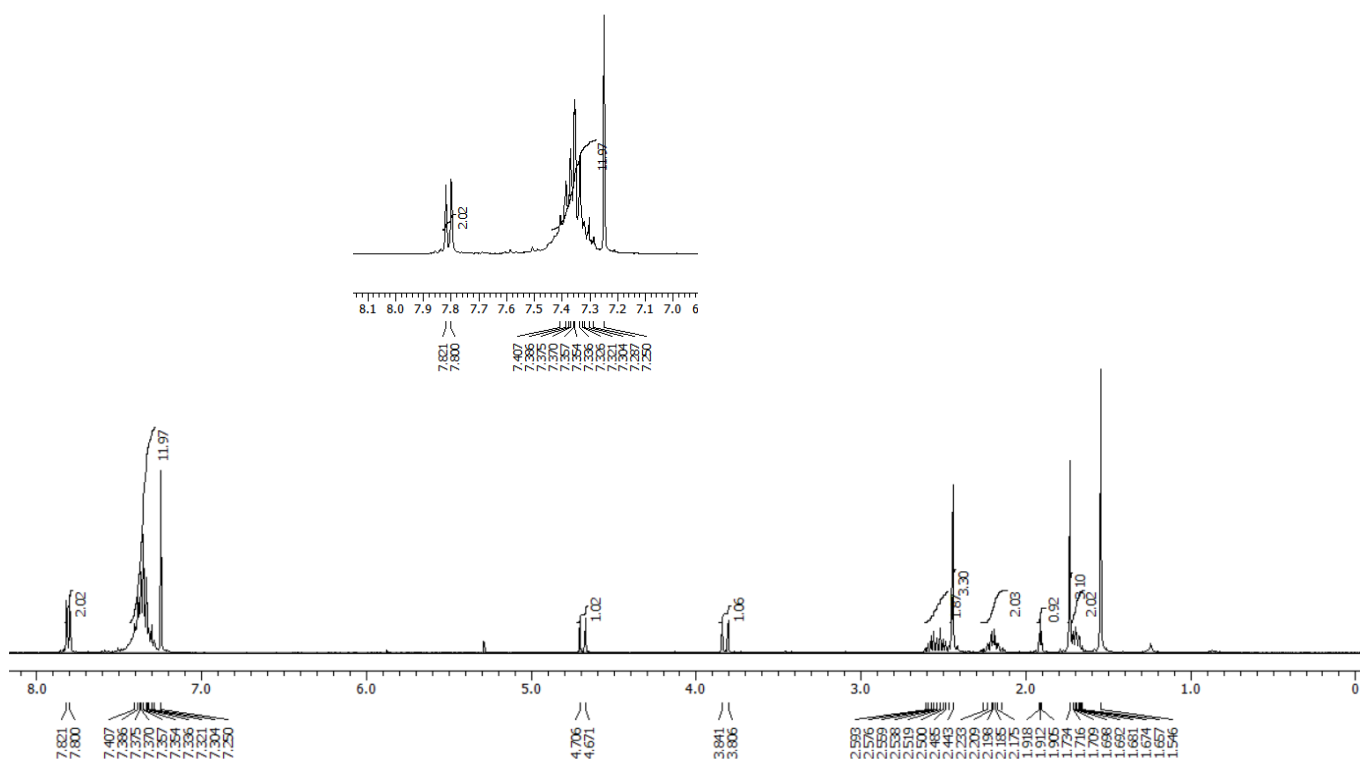



<sup>13</sup>C NMR spectrum of 3c (100 MHz, CDCl<sub>3</sub>)

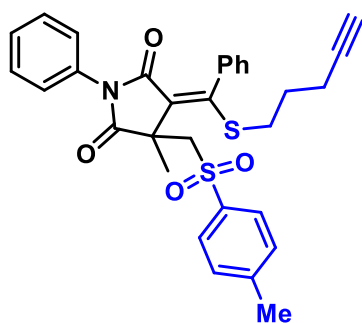

(3c)

(E)-3-methyl-4-((pent-4-yn-1-ylthio)(phenyl)methylene)-1-phenyl-3-(tosylmethyl)pyrrolidine-2,5-dione

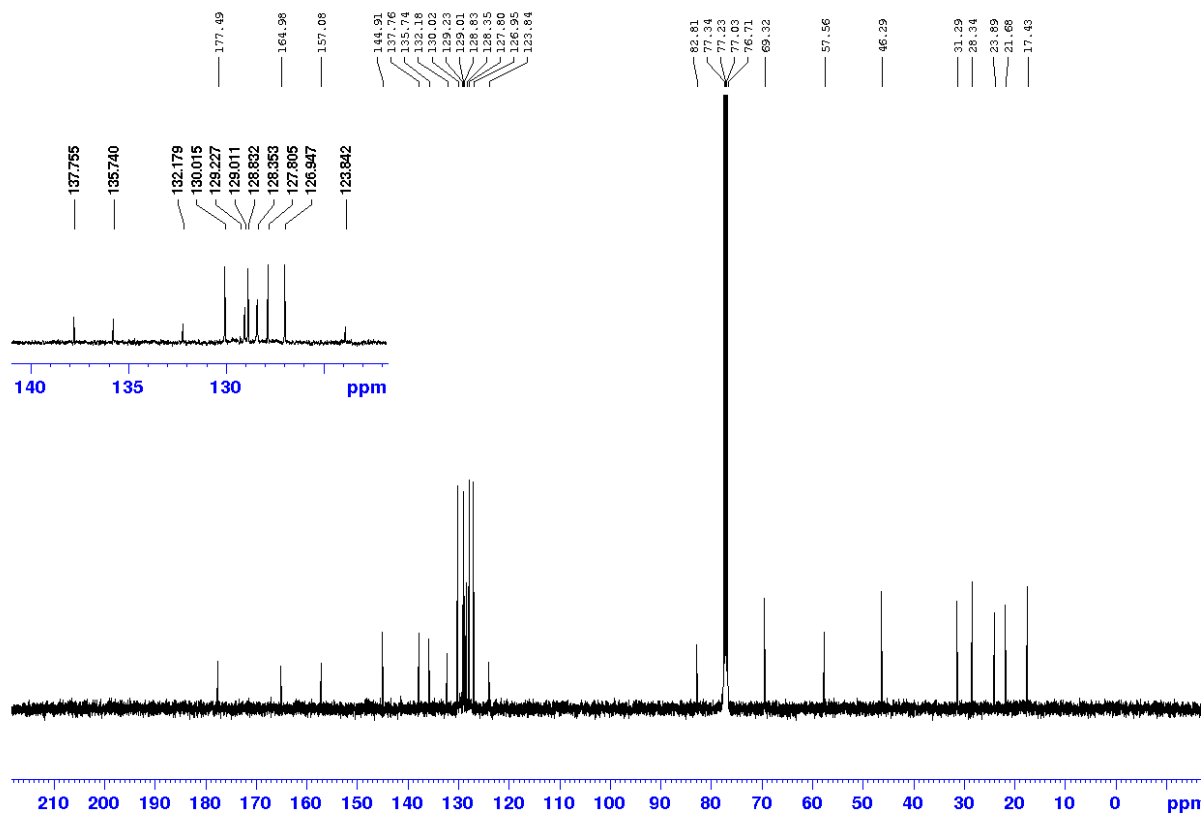

### HRMS spectrum of 3cj

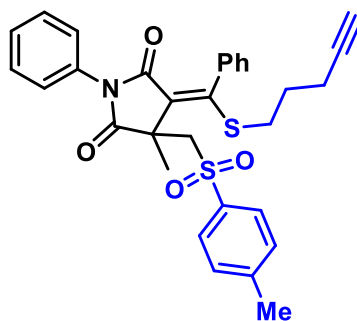

(3cj)

**(E)-3-methyl-4-((pent-4-yn-1-ylthio)(phenyl)methylene)-1-phenyl-3-(tosylmethyl)pyrrolidine-2,5-dione**

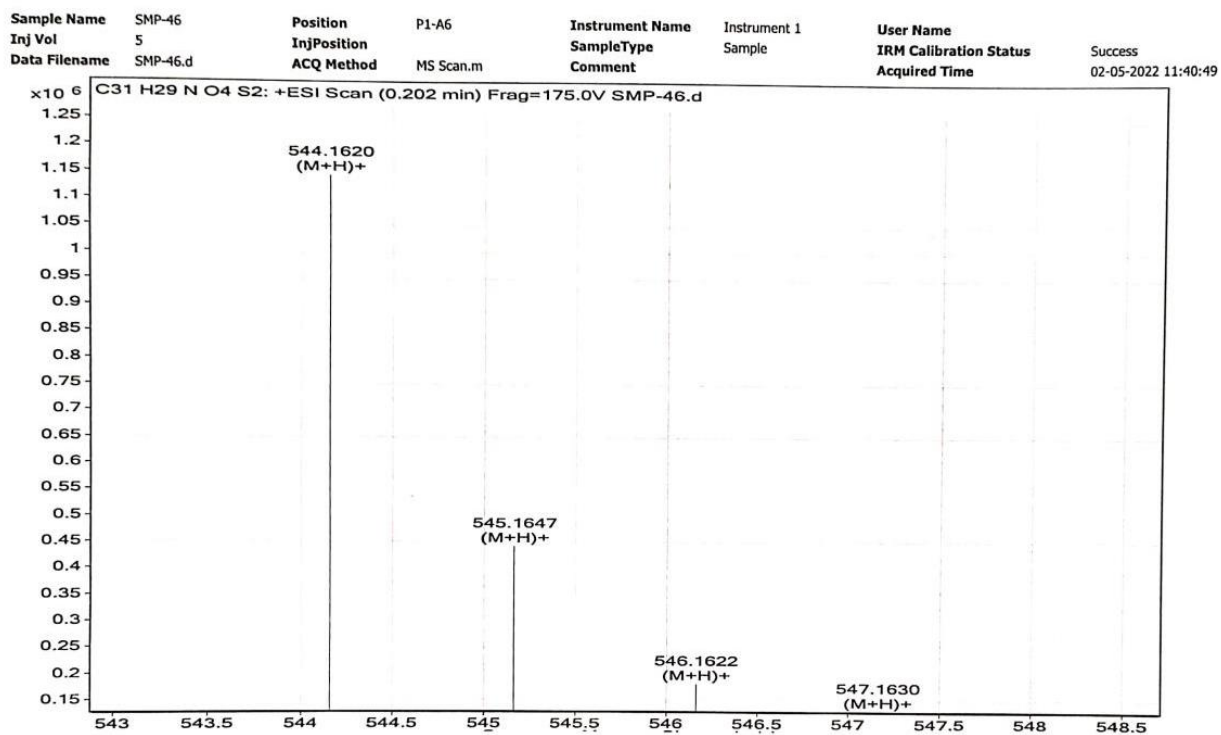

<sup>1</sup>H NMR spectrum of 3ck (400 MHz, CDCl<sub>3</sub>)

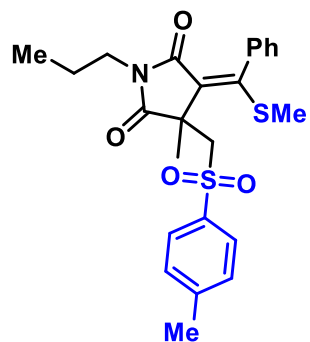

(3ck)

(*E*)-3-methyl-4-((methylthio)(phenyl)methylene)-1-propyl-3-(tosylmethyl)pyrrolidine-2,5-dione

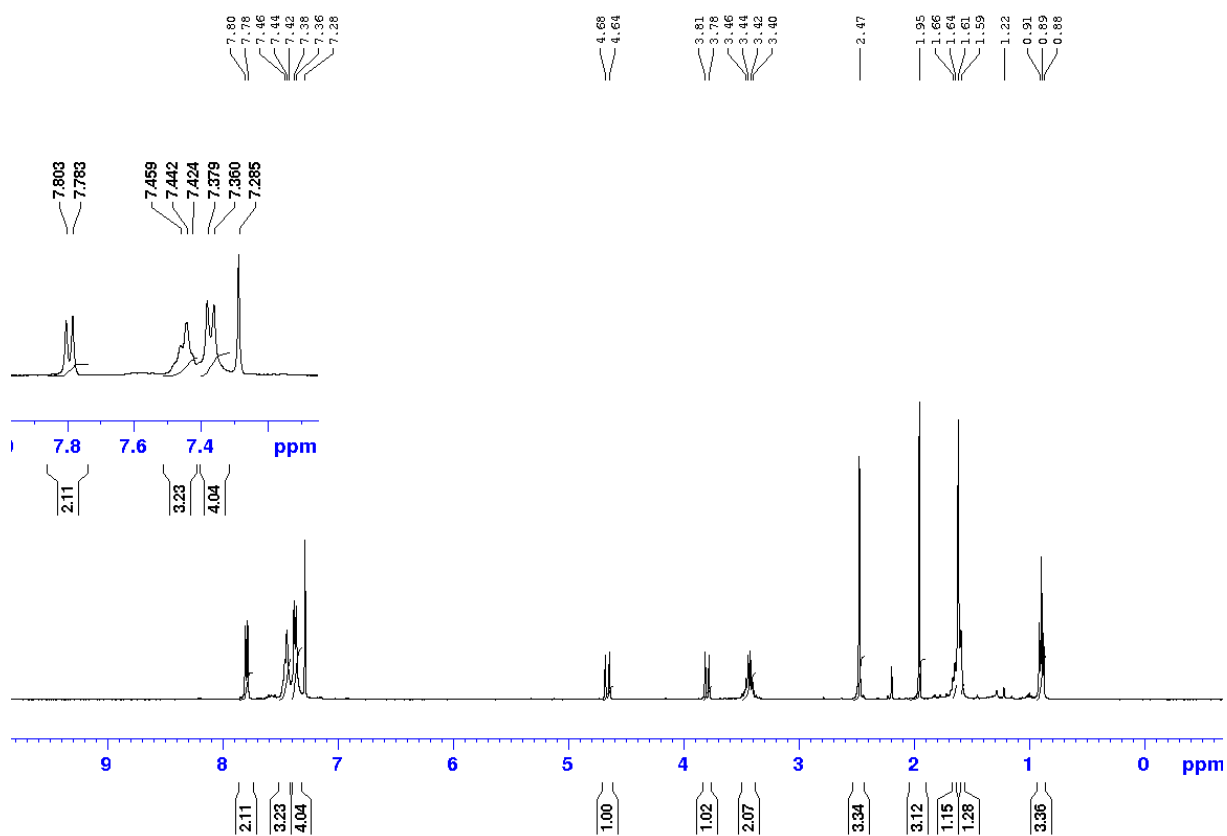

<sup>13</sup>C NMR spectrum of 3ck (100 MHz, CDCl<sub>3</sub>)

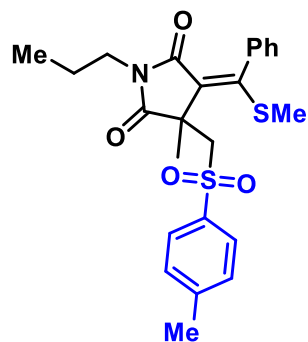

(3ck)

(*E*)-3-methyl-4-((methylthio)(phenyl)methylene)-1-propyl-3-(tosylmethyl)pyrrolidine-2,5-dione

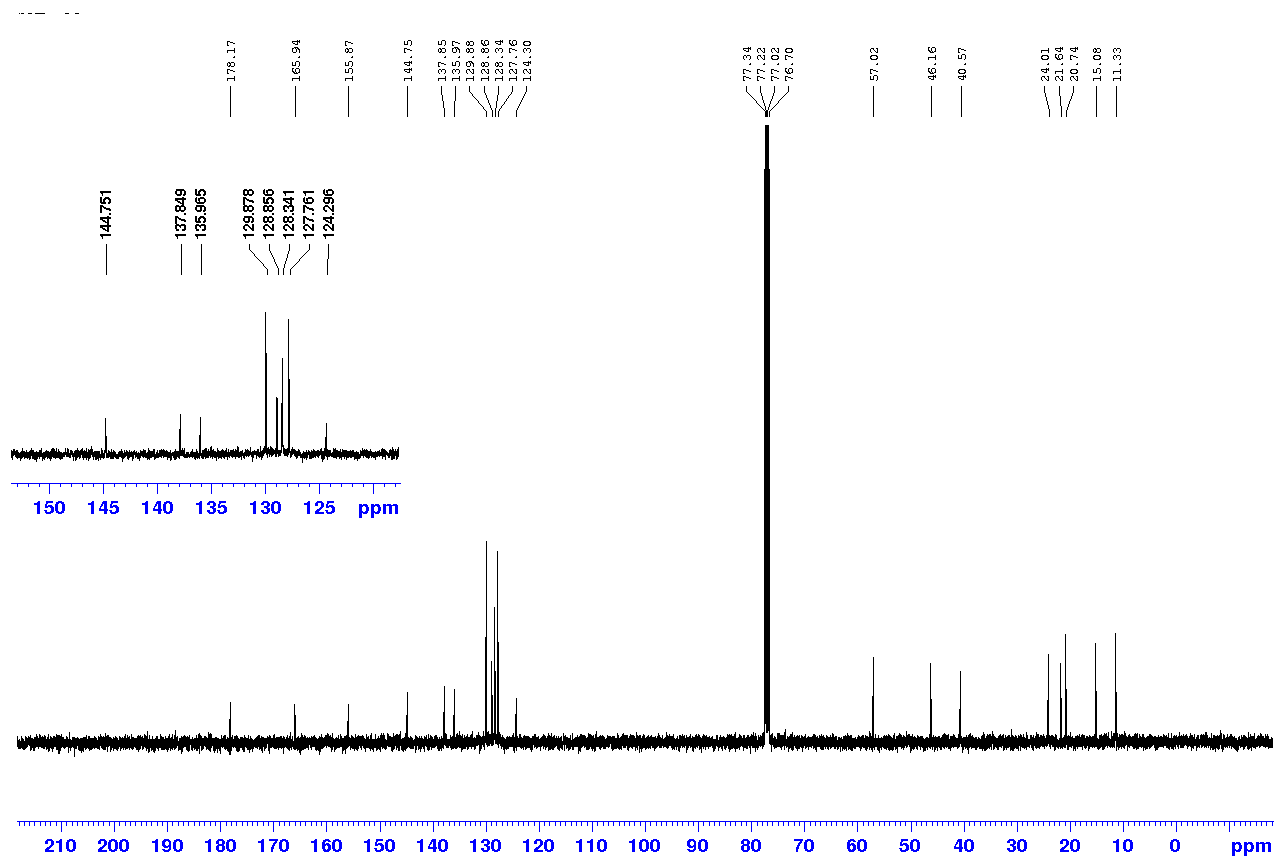

HRMS Spectrum of 3ck

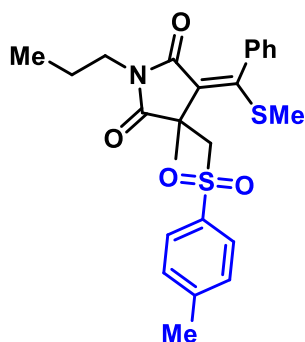

(3ck)

(E)-3-methyl-4-((methylthio)(phenyl)methylene)-1-propyl-3-(tosylmethyl)pyrrolidine-2,5-dione

### Qualitative Compound Report

|                        |              |               |                     |
|------------------------|--------------|---------------|---------------------|
| Data File              | SMP-53.d     | Sample Name   | SMP-53              |
| Sample Type            | Sample       | Position      | P1-B2               |
| Instrument Name        | Instrument 1 | User Name     |                     |
| Acq Method             | MS Scan.m    | Acquired Time | 21-05-2022 12:32:14 |
| IRM Calibration Status | Success      | DA Method     | Default.m           |
| Comment                |              |               |                     |

|                        |                                                   |   |
|------------------------|---------------------------------------------------|---|
| Sample Group           | Info.                                             | 3 |
| Acquisition SW Version | 6200 series TOF/6500 series Q-TOF B.05.01 (B5125) |   |

#### Compound Table

| Compound Label          | RT    | Mass     | Formula         | MFG Formula     | MFG Diff (ppm) | DB Formula      |
|-------------------------|-------|----------|-----------------|-----------------|----------------|-----------------|
| Cpd 11: C24 H27 N O4 S2 | 0.168 | 457.1398 | C24 H27 N O4 S2 | C24 H27 N O4 S2 | -3.54          | C24 H27 N O4 S2 |

| Compound Label          | m/z      | RT    | Algorithm                 | Mass     |
|-------------------------|----------|-------|---------------------------|----------|
| Cpd 11: C24 H27 N O4 S2 | 458.1471 | 0.168 | Find by Molecular Feature | 457.1398 |

#### MFE MS Spectrum

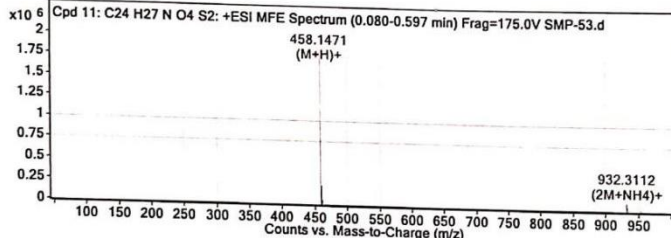

#### MFE MS Zoomed Spectrum

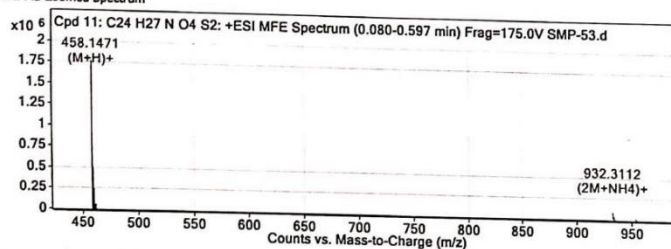

#### MS Spectrum Peak List

| m/z      | z | Abund      | Formula         | Ion       |
|----------|---|------------|-----------------|-----------|
| 458.1471 | 1 | 1776080.38 | C24 H28 N O4 S2 | (M+H)+    |
| 459.1499 | 1 | 510288.45  | C24 H28 N O4 S2 | (M+H)+    |
| 460.1463 | 1 | 224335.98  | C24 H28 N O4 S2 | (M+H)+    |
| 461.1485 | 1 | 49149.96   | C24 H28 N O4 S2 | (M+H)+    |
| 932.3112 | 1 | 98226.48   |                 | (2M+NH4)+ |
| 933.3138 | 1 | 54833.99   |                 | (2M+NH4)+ |
| 934.3118 | 1 | 32858.77   |                 | (2M+NH4)+ |
| 935.3122 | 1 | 12767.99   |                 | (2M+NH4)+ |
| 953.2485 | 1 | 24509.31   |                 | (2M+K)+   |
| 954.2518 | 1 | 13705.86   |                 | (2M+K)+   |

<sup>1</sup>H NMR spectrum of 5a (400 MHz, CDCl<sub>3</sub>)

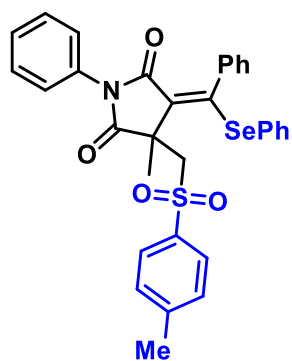

(5a)

(*E*)-3-methyl-1-phenyl-4-(phenyl(phenylselanyl)methylene)-3-(tosylmethyl)pyrrolidine-2,5-dione

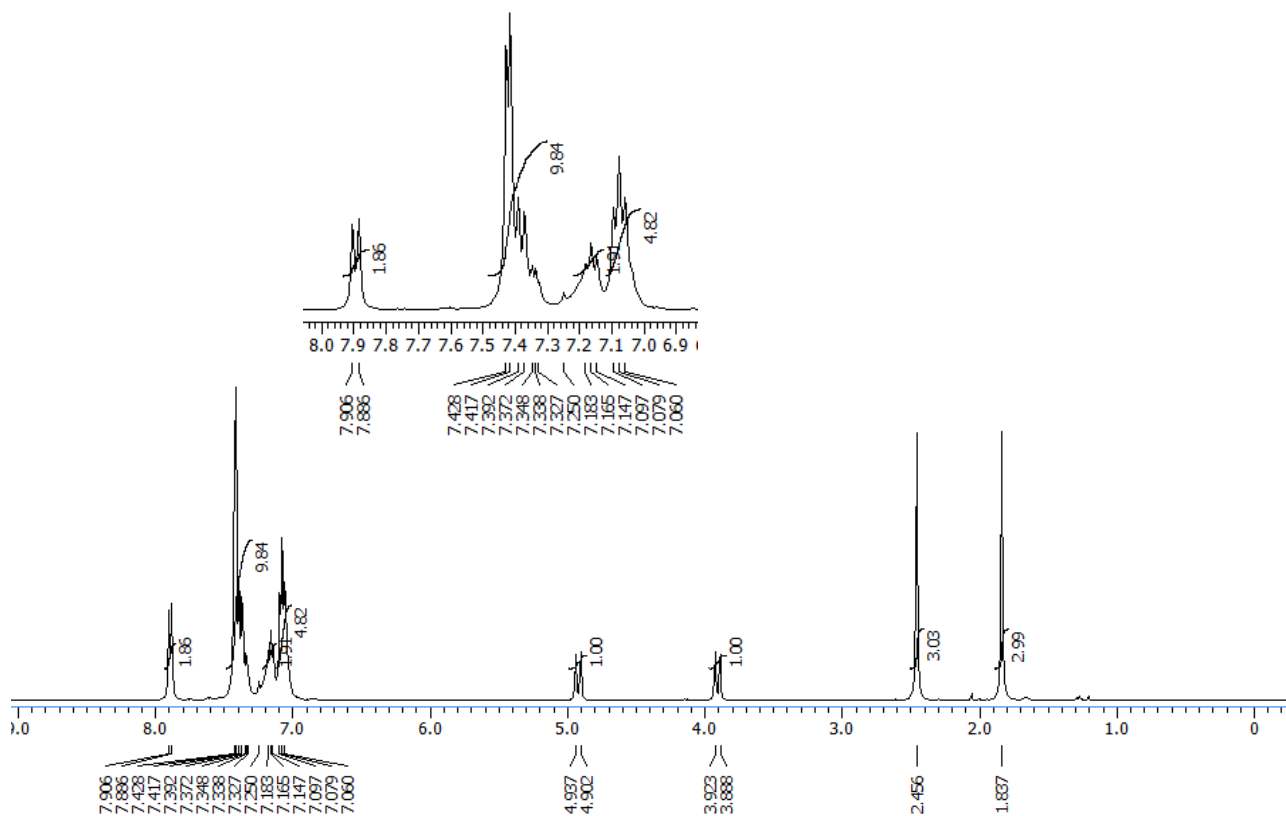

<sup>13</sup>C NMR spectrum of 5a (100 MHz, CDCl<sub>3</sub>)



(5a)

(*E*)-3-methyl-1-phenyl-4-(phenyl(phenylselanyl)methylene)-3-(tosylmethyl)pyrrolidine-2,5-dione

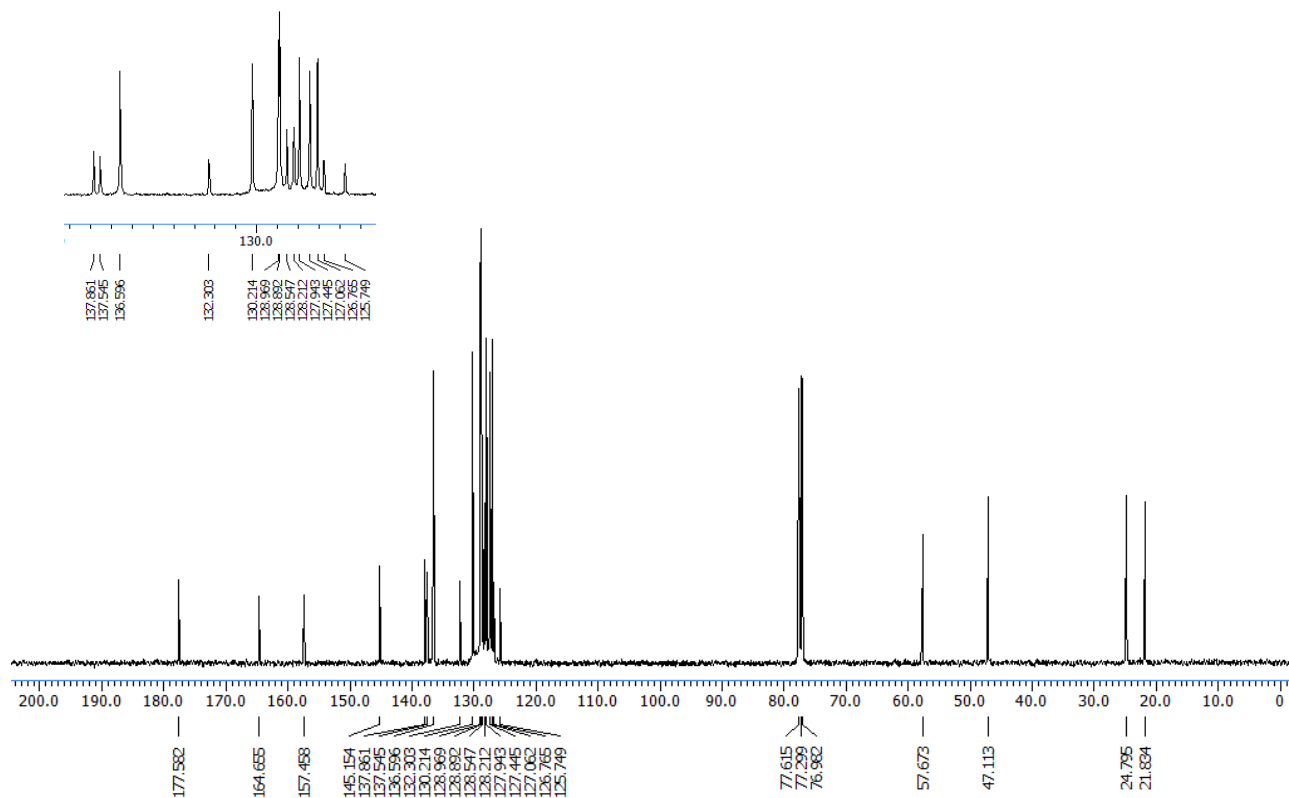

### HRMS Spectrum of 5a

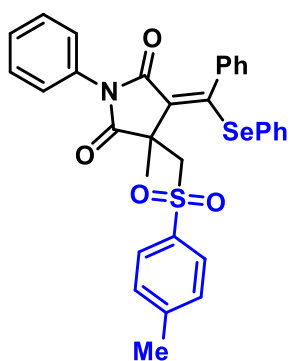

(5a)

**(E)-3-methyl-1-phenyl-4-(phenyl(phenylselanyl)methylene)-3-(tosylmethyl)pyrrolidine-2,5-dione**

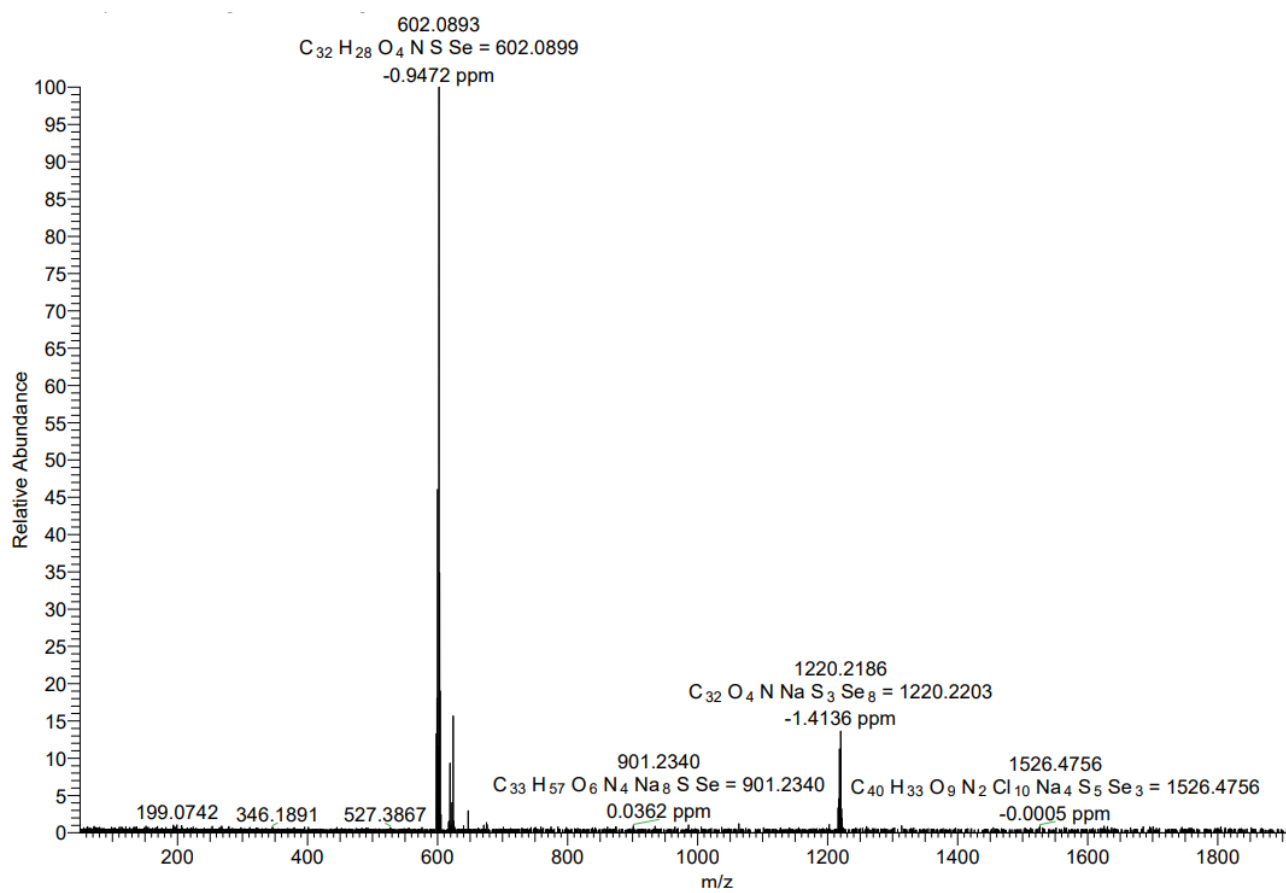



<sup>1</sup>H NMR spectrum of 5b (400 MHz, CDCl<sub>3</sub>)

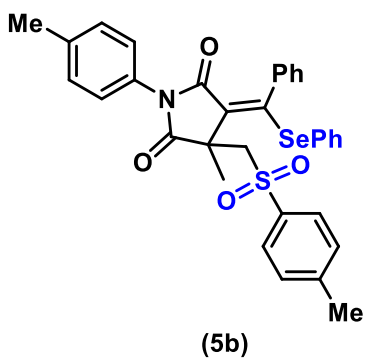

*(E)*-3-methyl-4-(phenyl(phenylselanyl)methylene)-1-(*p*-tolyl)-3-(tosylmethyl)pyrrolidine-2,5-dione

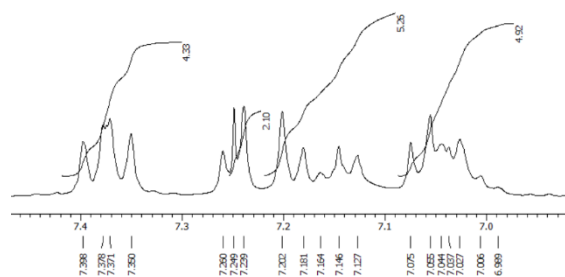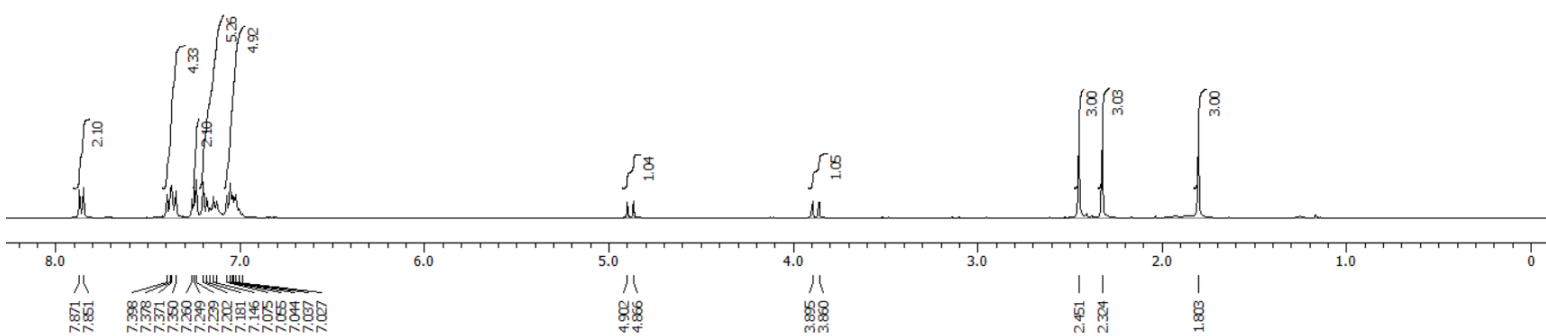

<sup>13</sup>C NMR spectrum of 5b (100 MHz, CDCl<sub>3</sub>)

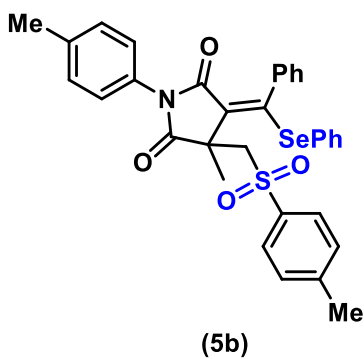

*(E)*-3-methyl-4-(phenyl(phenylselanyl)methylene)-1-(*p*-tolyl)-3-(tosylmethyl)pyrrolidine-2,5-dione

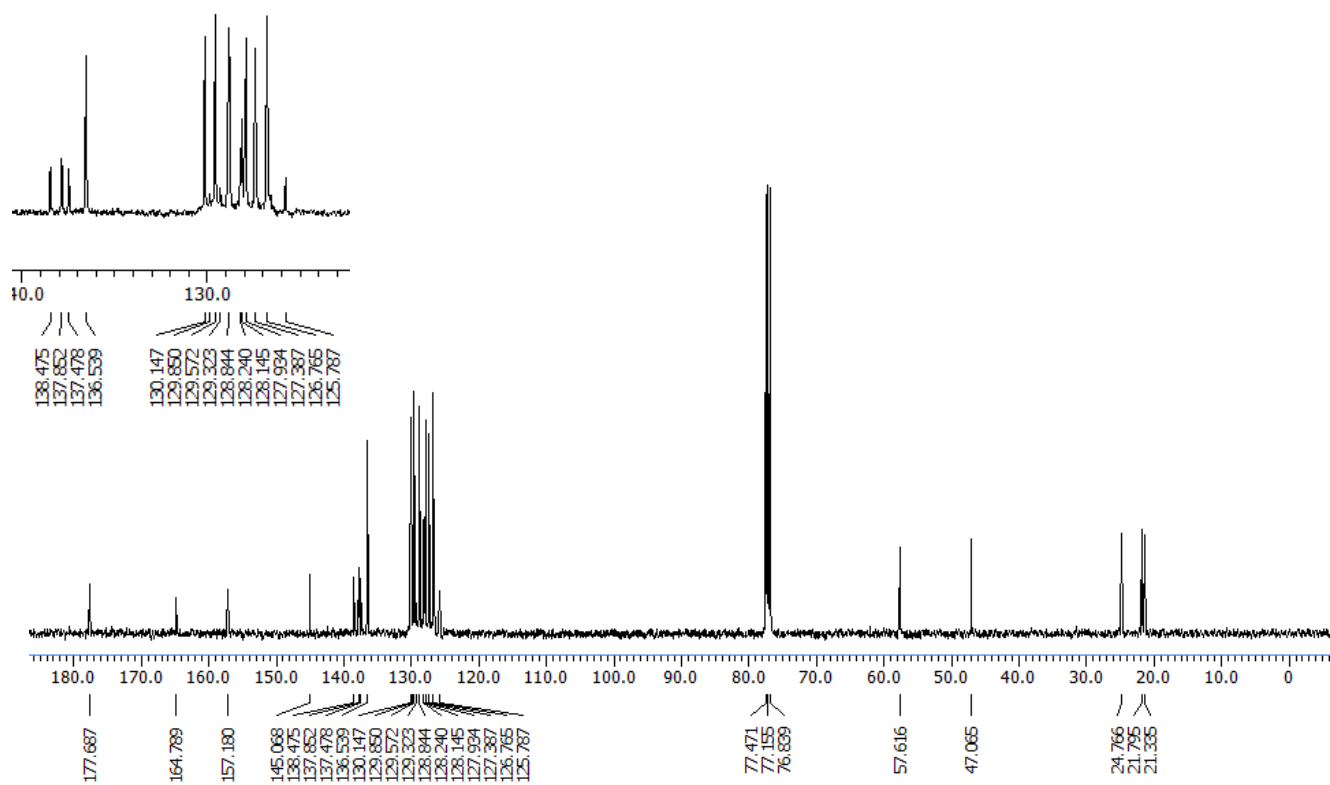

### HRMS spectrum of 5b

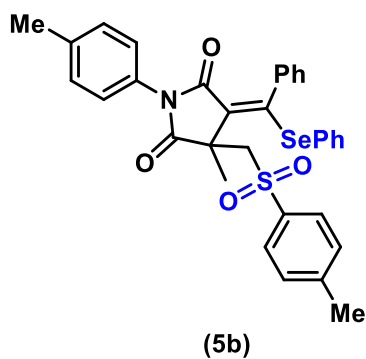

(E)-3-methyl-4-(phenyl(phenylselanyl)methylene)-1-(p-tolyl)-3-(tosylmethyl)pyrrolidine-2,5-dione

| Sample Name | Position           | Instrument Name | Instrument 1           | User Name           |
|-------------|--------------------|-----------------|------------------------|---------------------|
| SMP-30      | P1-A9              |                 | Sample                 |                     |
| File Name   | Injection Position | Sample Type     | IRM Calibration Status | Success             |
| SMP-30.d    | MS Scan.m          |                 |                        | 02-05-2022 11:47:01 |
| ACQ Method  | Comment            | Acquired Time   |                        |                     |

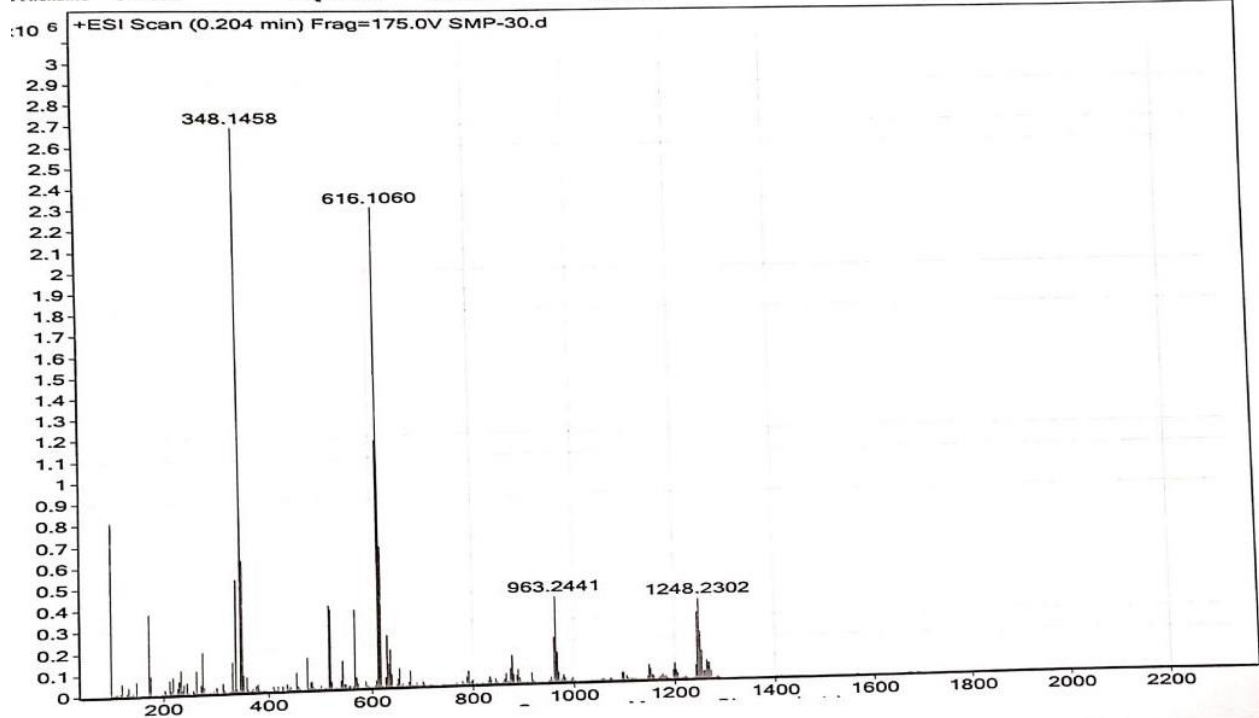

<sup>1</sup>H NMR spectrum of 5c (400 MHz, CDCl<sub>3</sub>)

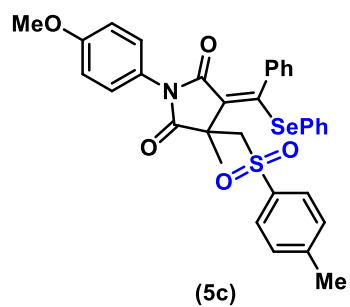

(E)-1-(4-methoxyphenyl)-3-methyl-4-(phenyl(phenylselanyl)methylene)-3-(tosylmethyl)pyrrolidine-2,5-dione

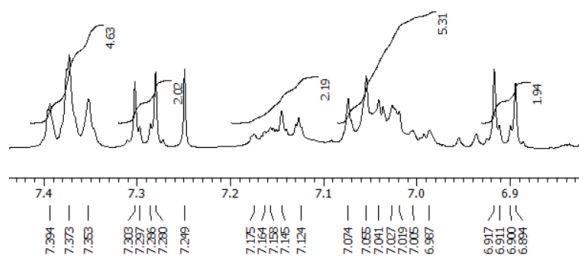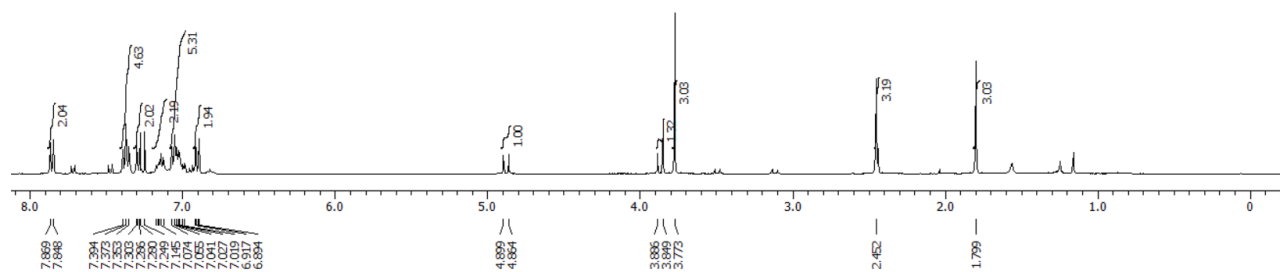

**<sup>13</sup>C NMR spectrum of 5c (100 MHz, CDCl<sub>3</sub>)**

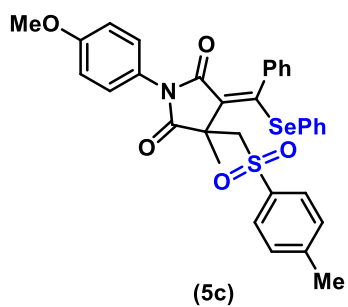

**(E)-1-(4-methoxyphenyl)-3-methyl-4-(phenyl(phenylselanyl)methylene)-3-(tosylmethyl)pyrrolidine-2,5-dione**

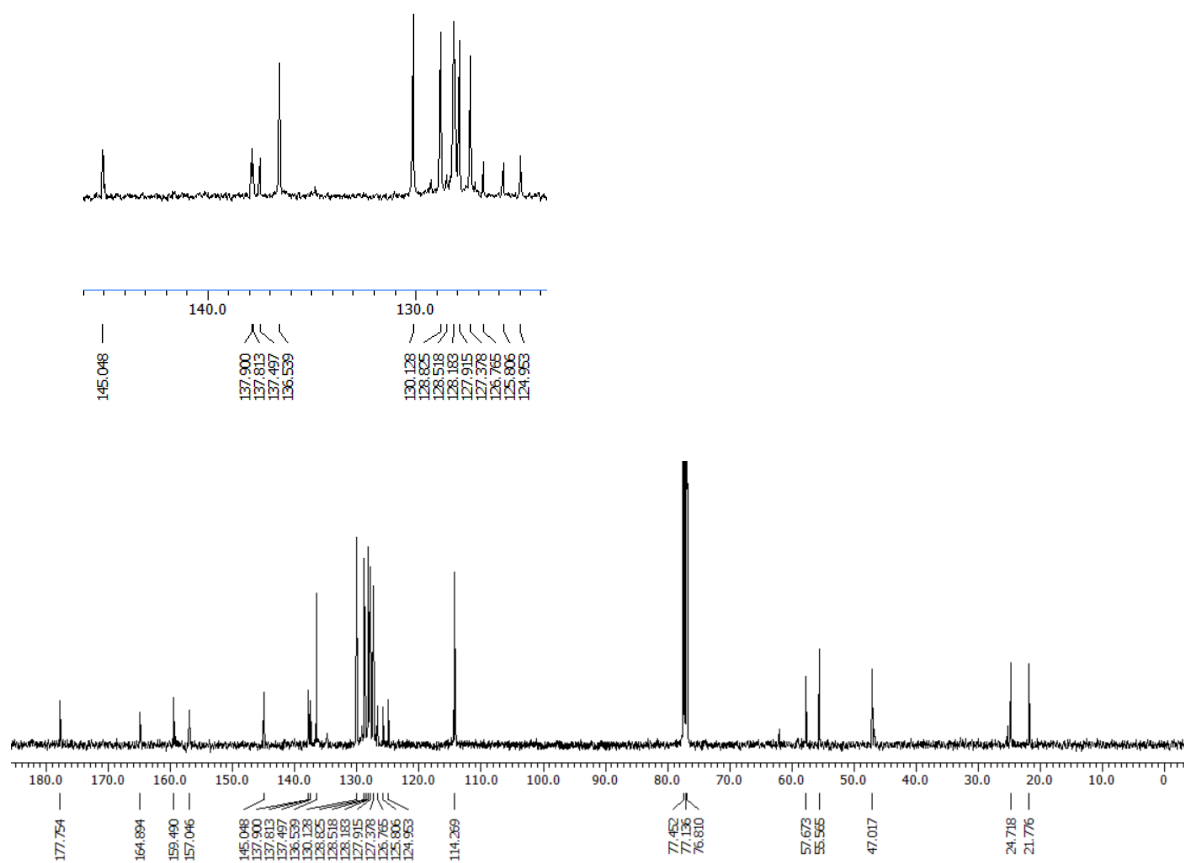

## HRMS Spectrum of 5c

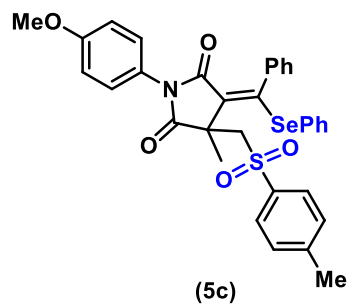

(E)-1-(4-methoxyphenyl)-3-methyl-4-(phenyl(phenylselanyl)methylene)-3-(tosylmethyl)pyrrolidine-2,5-dione

|               |          |             |           |                 |              |                        |                    |
|---------------|----------|-------------|-----------|-----------------|--------------|------------------------|--------------------|
| Sample Name   | SMP-31   | Position    | P1-A8     | Instrument Name | Instrument 1 | User Name              |                    |
| Inj Vol       | 5        | InjPosition |           | SampleType      | Sample       | IRM Calibration Status | Success            |
| Data Filename | SMP-31.d | ACQ Method  | MS Scan.m | Comment         |              | Acquired Time          | 02-05-2022 11:45:1 |

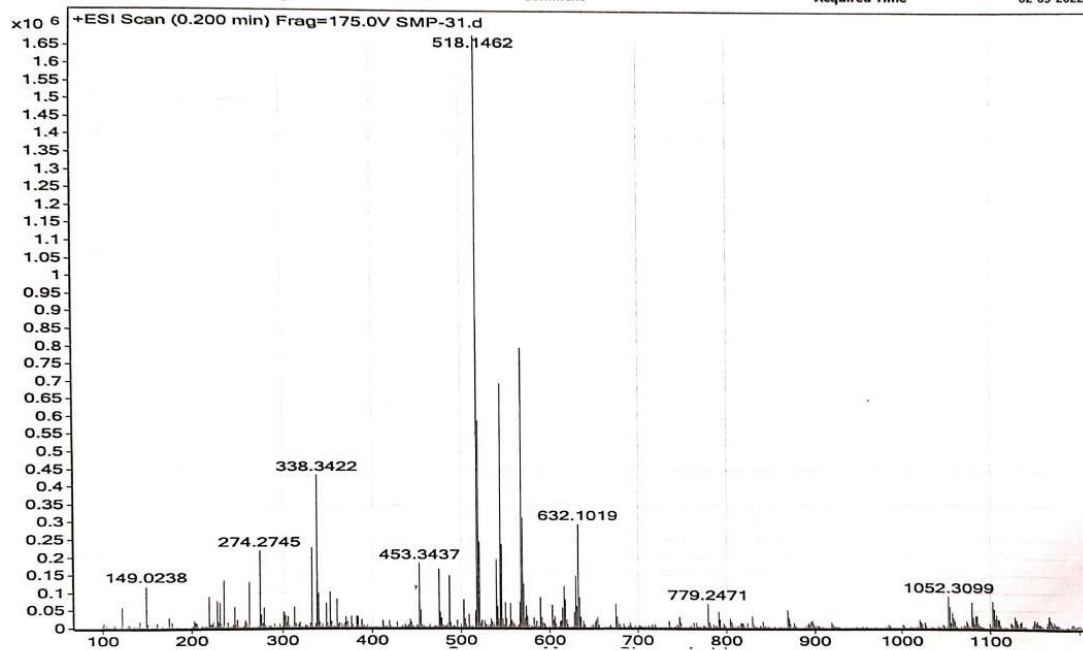

<sup>1</sup>H NMR spectrum of 5d (400 MHz, CDCl<sub>3</sub>)

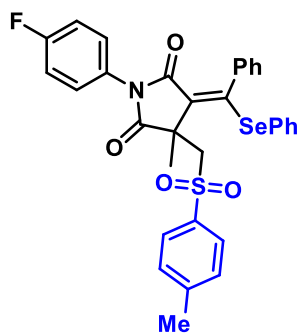

(5d)

(E)-1-(4-fluorophenyl)-3-methyl-4-(phenyl(phenylselanyl)methylene)-3-(tosylmethyl)pyrrolidine-2,5-dione

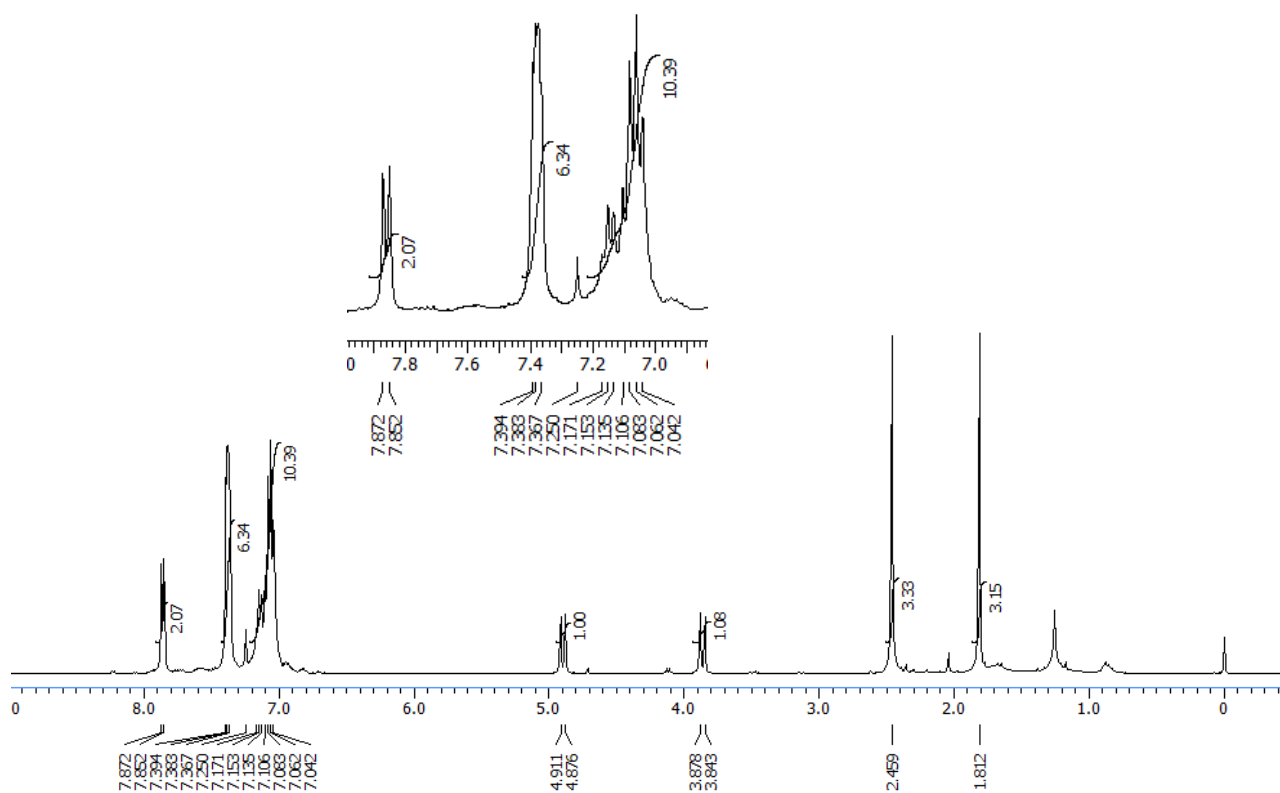

<sup>13</sup>C NMR spectrum of 5d (100 MHz, CDCl<sub>3</sub>)



(5d)

(E)-1-(4-fluorophenyl)-3-methyl-4-(phenyl(phenylselanyl)methylene)-3-(tosylmethyl)pyrrolidine-2,5-dione

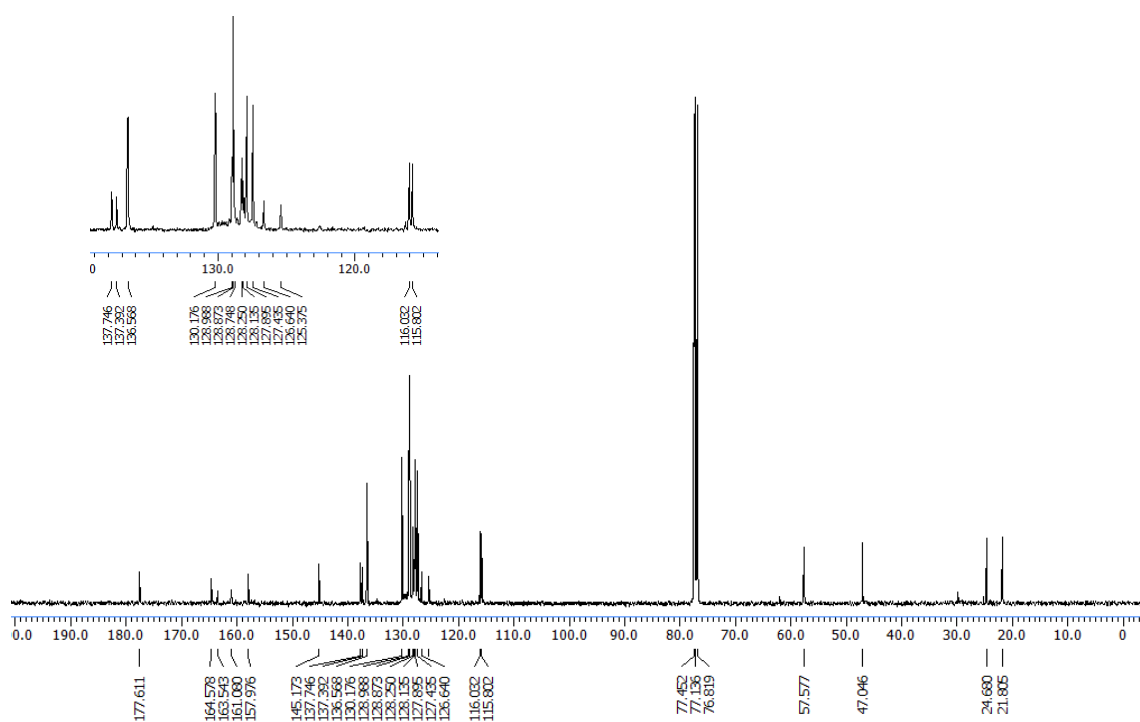



**$^{19}\text{F}$  Spectrum of 5d (376 MHz,  $\text{CDCl}_3$ )**



(5d)

**(E)-1-(4-fluorophenyl)-3-methyl-4-(phenyl(phenylselanyl)methylene)-3-(tosylmethyl)pyrrolidine-2,5-dione**

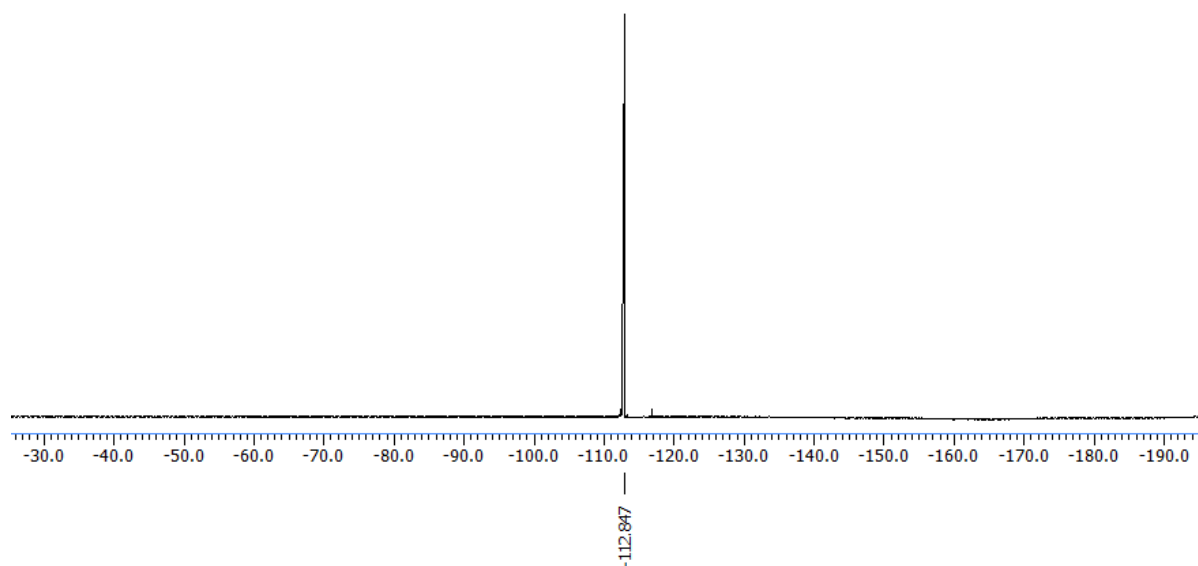

## HRMS Spectrum of 5d

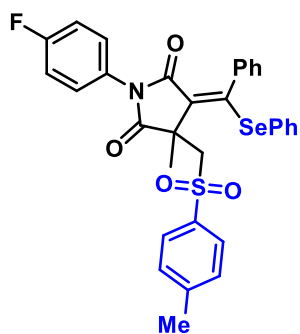

(5d)

(E)-1-(4-fluorophenyl)-3-methyl-4-(phenyl(phenylselanyl)methylene)-3-(tosylmethyl)pyrrolidine-2,5-dione

## Qualitative Compound Report

|                        |              |               |                     |
|------------------------|--------------|---------------|---------------------|
| Data File              | SMP-26.d     | Sample Name   | SMP-26              |
| Sample Type            | Sample       | Position      | P1-A7               |
| Instrument Name        | Instrument 1 | User Name     |                     |
| Acq Method             | MS Scan.m    | Acquired Time | 28-04-2022 10:57:44 |
| IRM Calibration Status | Success      | DA Method     | Default.m           |
| Comment                |              |               |                     |

|                |                             |   |
|----------------|-----------------------------|---|
| Sample Group   | Info.                       | 3 |
| Acquisition SW | 6200 series TOF/6500 series |   |
| Version        | Q-TOF B.05.01 (B5125)       |   |

### Compound Table

| Compound Label | RT    | Mass     | MFG Formula |
|----------------|-------|----------|-------------|
| Cpd 9: 0.194   | 0.194 | 619.0752 | <none>      |

| Compound Label | m/z      | RT    | Algorithm                 | Mass     |
|----------------|----------|-------|---------------------------|----------|
| Cpd 9: 0.194   | 620.0824 | 0.194 | Find by Molecular Feature | 619.0752 |

### MFE MS Spectrum

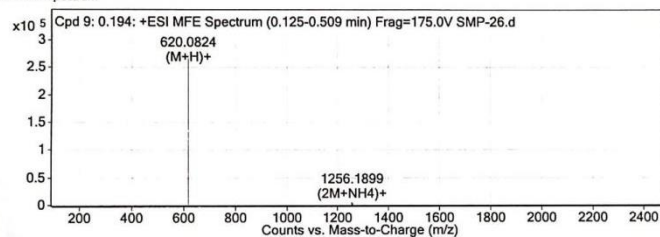

### MFE MS Zoomed Spectrum

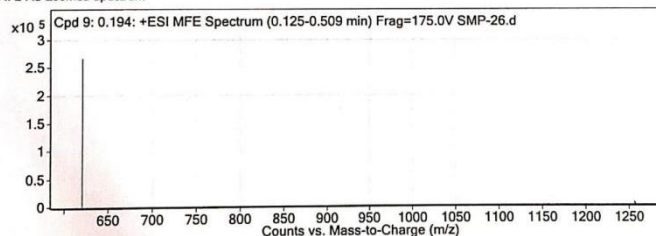

### MS Spectrum Peak List

| m/z       | z | Abund     | Ion       |
|-----------|---|-----------|-----------|
| 620.0824  | 1 | 267003.84 | (M+H)+    |
| 1256.1899 | 1 | 4949.82   | (2M+NH4)+ |
| 1257.1869 | 1 | 3838.71   | (2M+NH4)+ |
| 1258.1891 | 1 | 3399.41   | (2M+NH4)+ |

<sup>1</sup>H NMR spectrum of 5e (400 MHz, CDCl<sub>3</sub>)

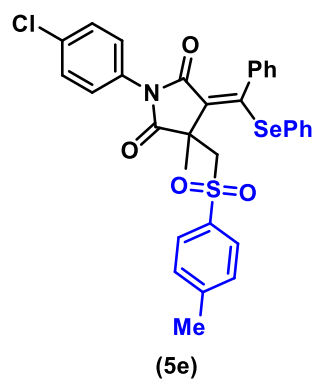

(E)-1-(4-chlorophenyl)-3-methyl-4-(phenyl(phenylselanyl)methylene)-3-(tosylmethyl)pyrrolidine-2,5-dione

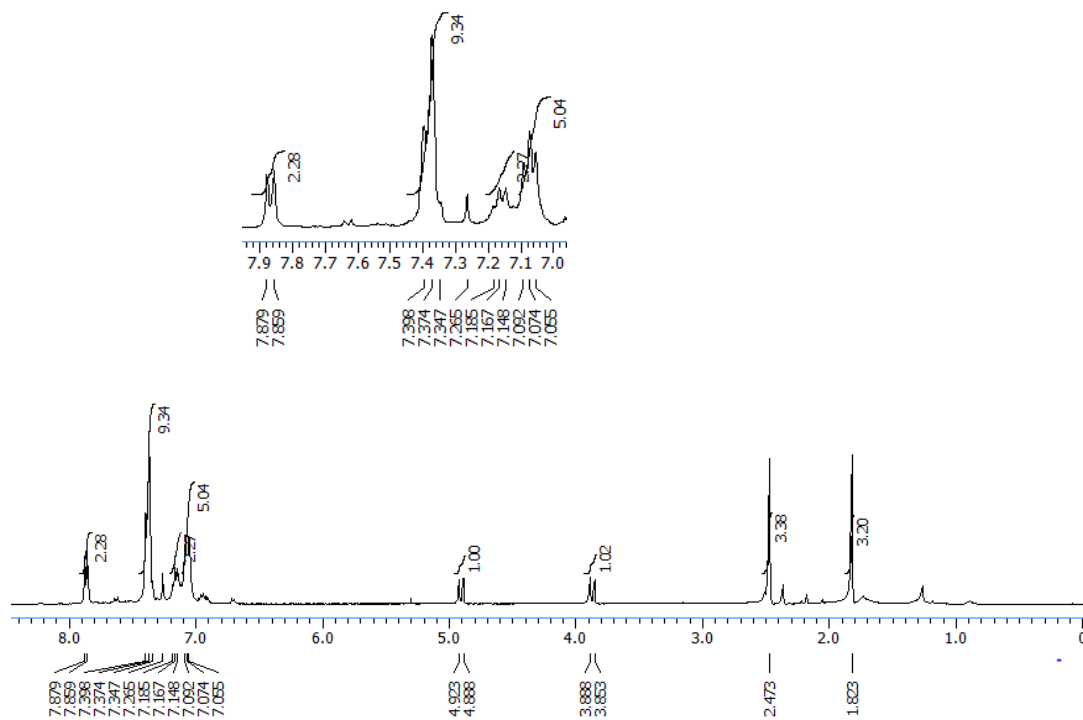



## HRMS Spectrum of 5e

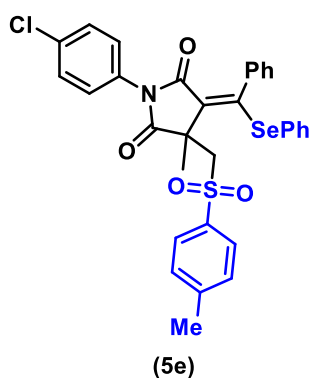

(E)-1-(4-chlorophenyl)-3-methyl-4-(phenyl(phenylselanyl)methylene)-3-(tosylmethyl)pyrrolidine-2,5-dione

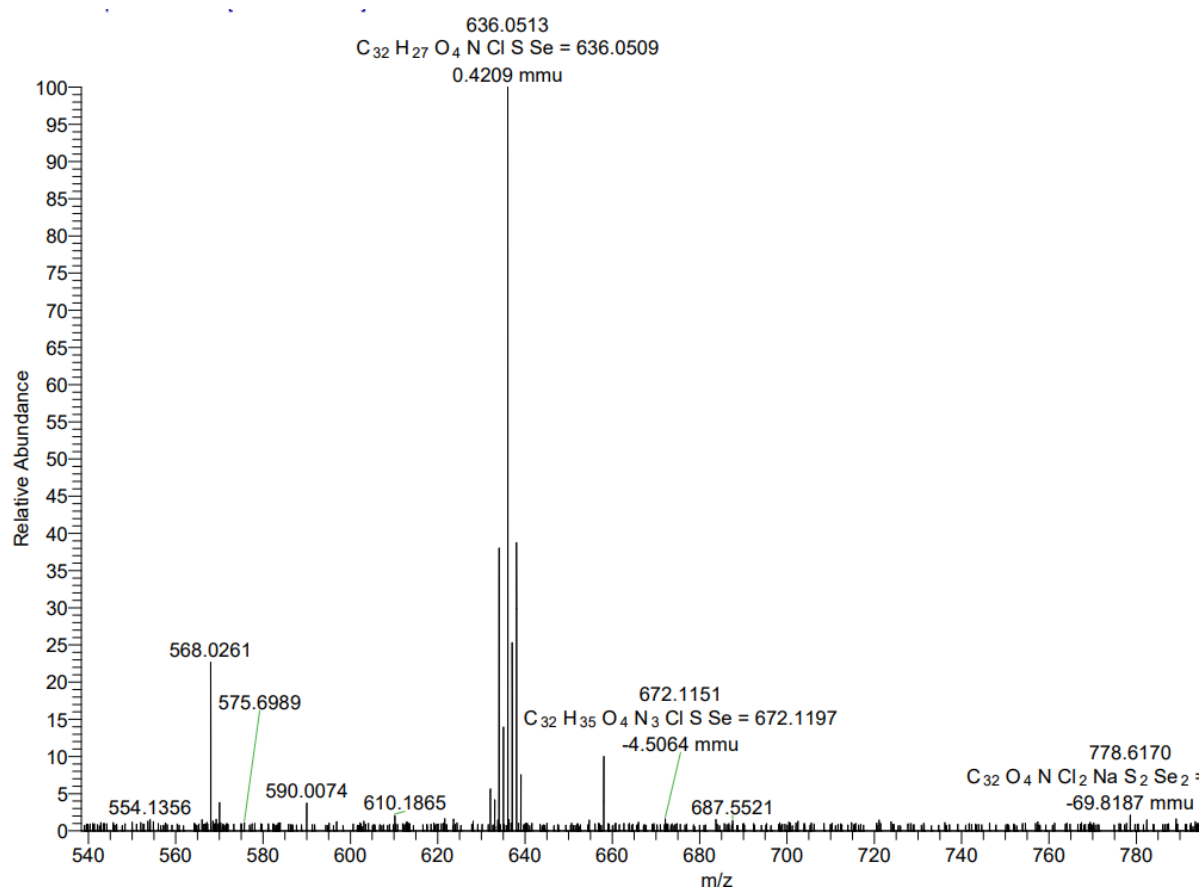

**<sup>1</sup>H NMR spectrum of 5f (400 MHz, CDCl<sub>3</sub>)**

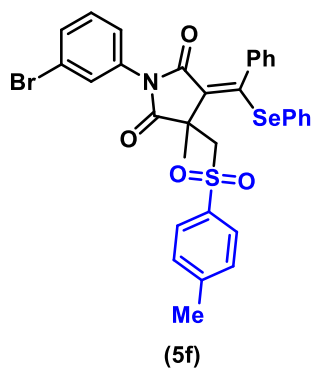

**(E)-1-(3-bromophenyl)-3-methyl-4-(phenyl(phenylselanyl)methylene)-3-(tosylmethyl)pyrrolidine-2,5-dione**

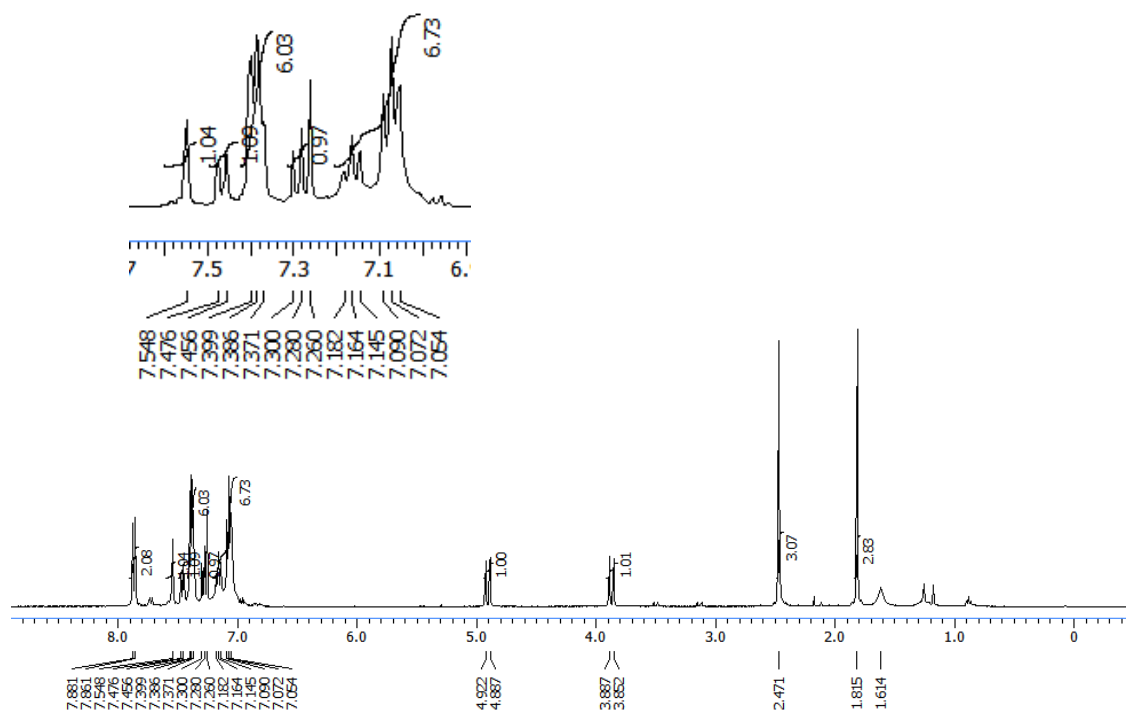

<sup>13</sup>C NMR spectrum of 5f (100 MHz, CDCl<sub>3</sub>)

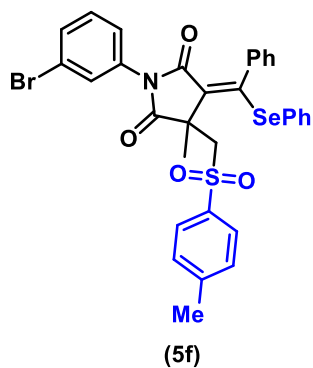

(E)-1-(3-bromophenyl)-3-methyl-4-(phenyl(phenylselenanyl)methylene)-3-(tosylmethyl)pyrrolidine-2,5-dione

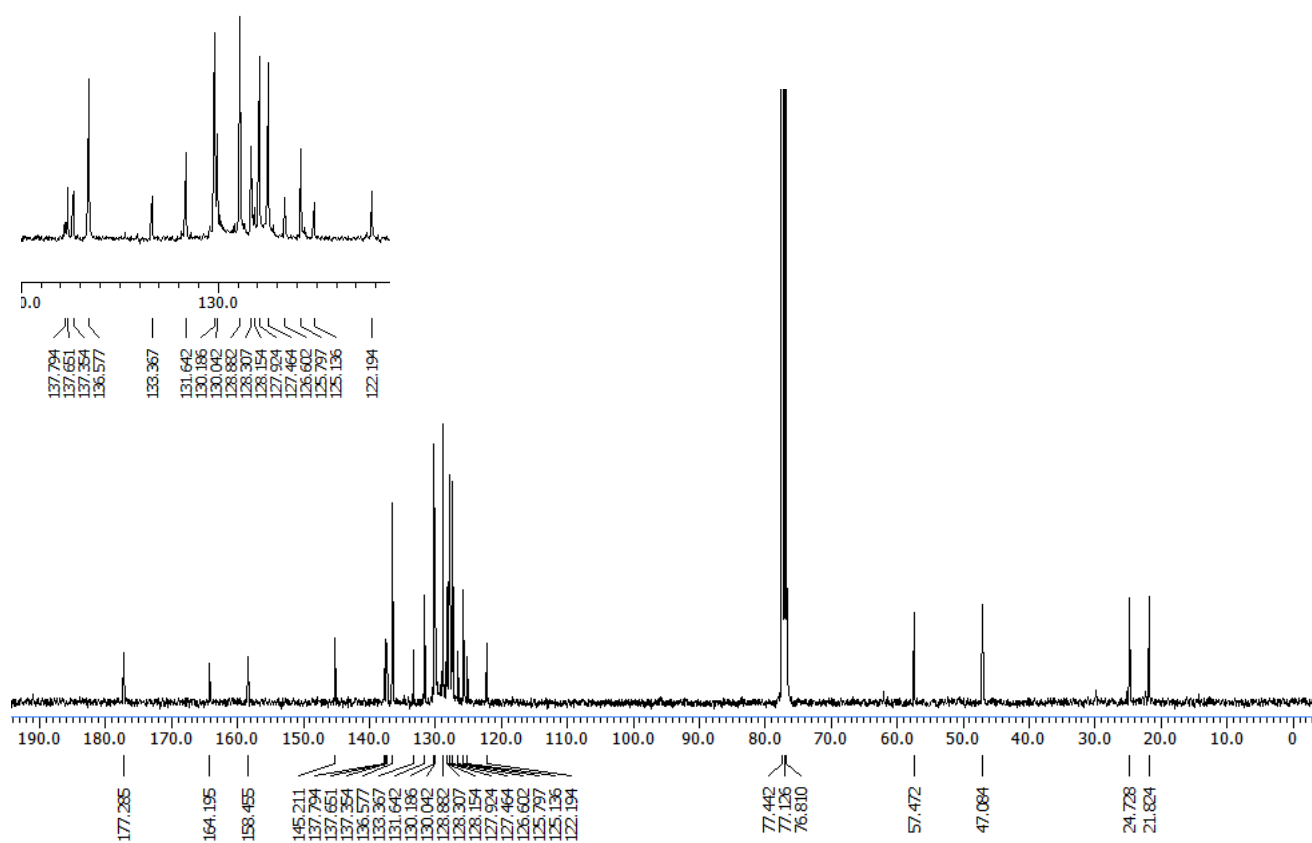

# HRMS Spectrum of 5f

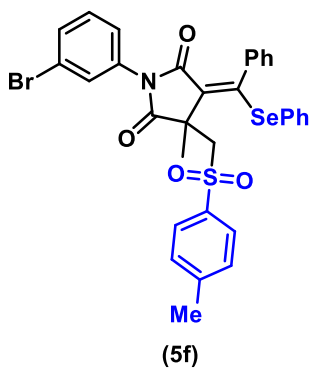

(E)-1-(3-bromophenyl)-3-methyl-4-(phenyl(phenylselenanyl)methylene)-3-(tosylmethyl)pyrrolidine-2,5-dione

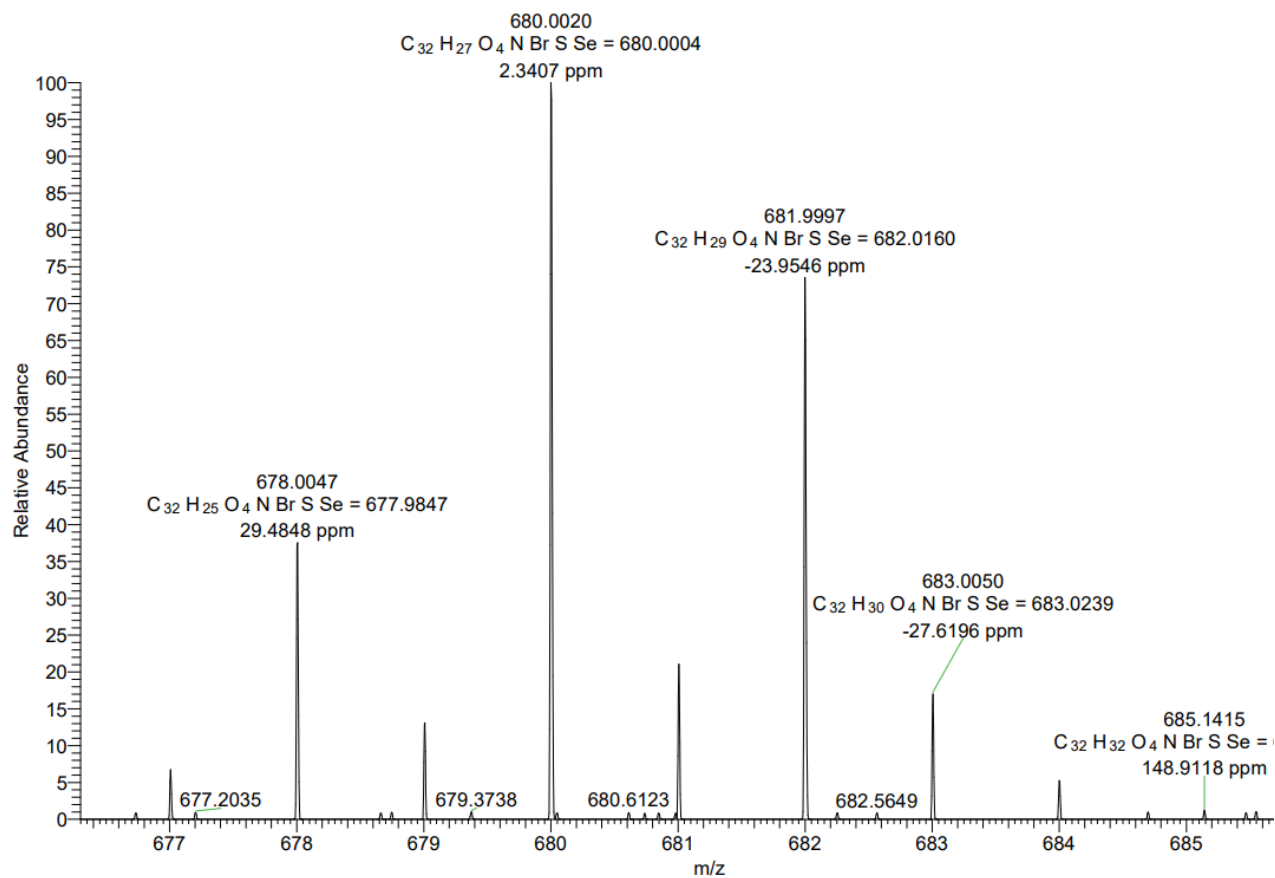



<sup>1</sup>H NMR spectrum of 5g (400 MHz, CDCl<sub>3</sub>)

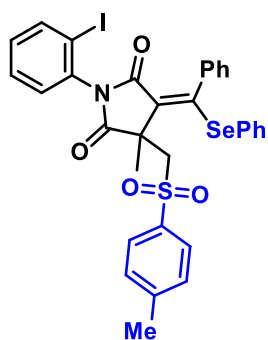

(5g)

(E)-1-(2-iodophenyl)-3-methyl-4-(phenyl(phenylselanyl)methylene)-3-(tosylmethyl)pyrrolidine-2,5-dione

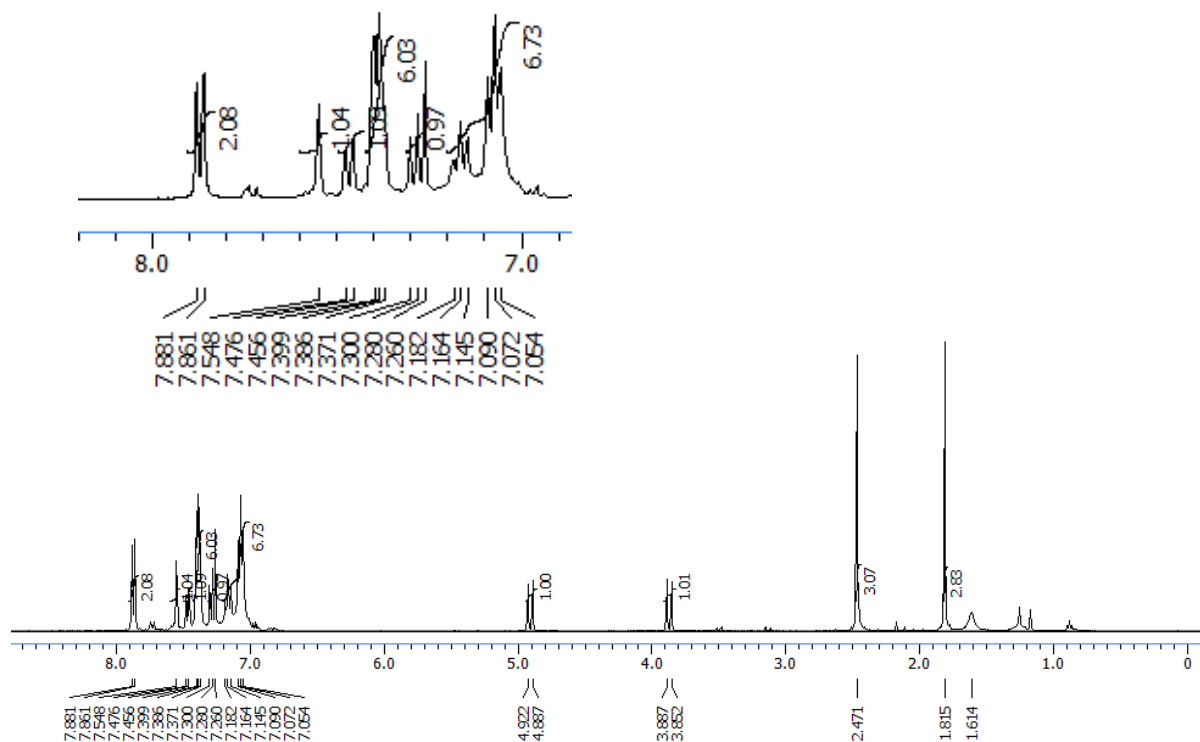

<sup>13</sup>CNMR spectrum of 5g (100 MHz, CDCl<sub>3</sub>)

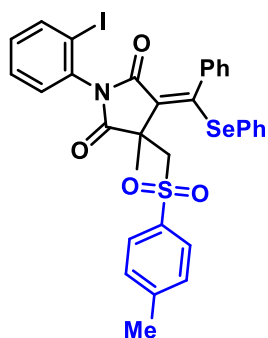

(5g)

(E)-1-(2-iodophenyl)-3-methyl-4-(phenyl(phenylselanyl)methylene)-3-(tosylmethyl)pyrrolidine-2,5-dione

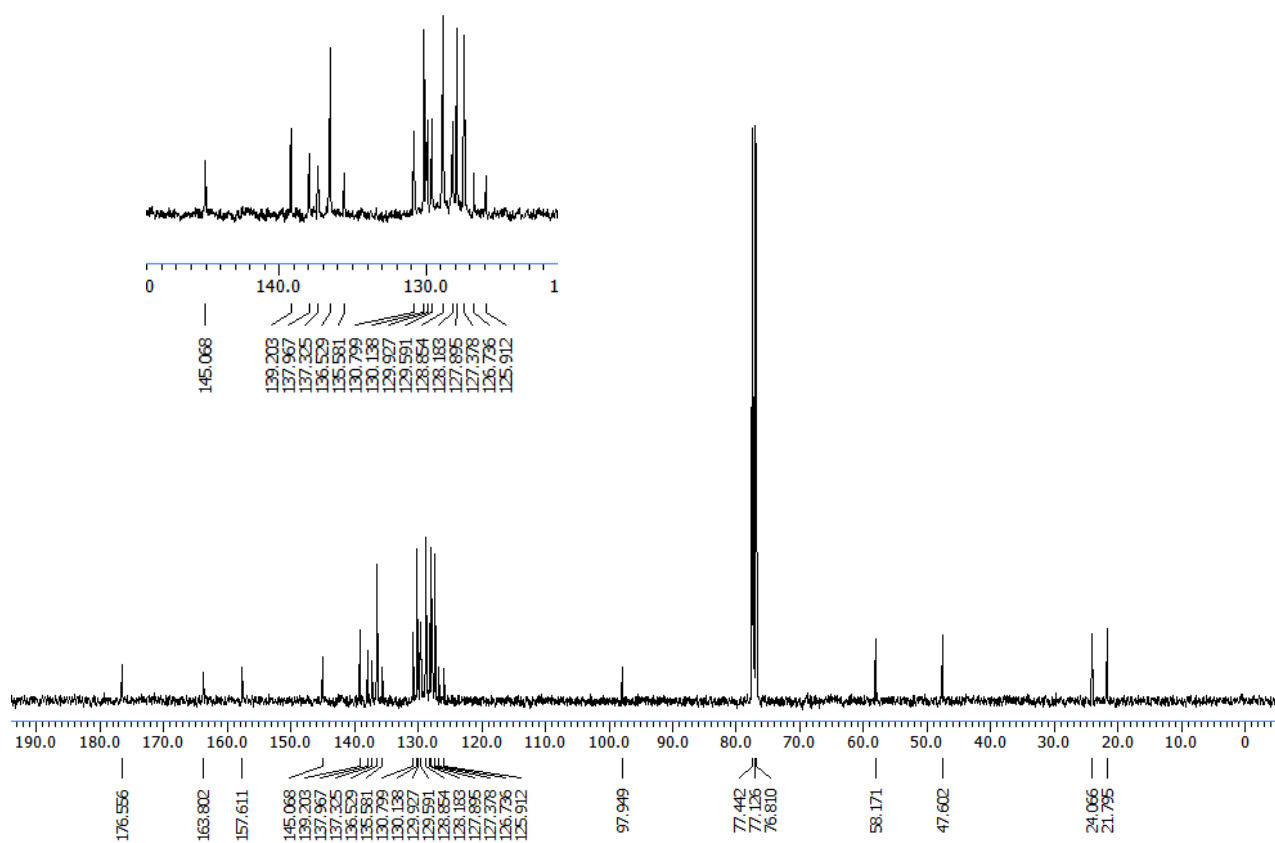

## HRMS Spectrum of 5g

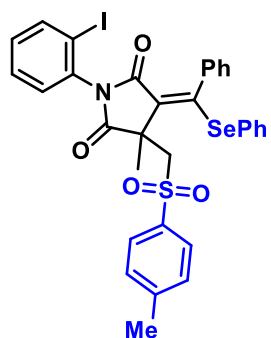

(5g)

(E)-1-(2-iodophenyl)-3-methyl-4-(phenyl(phenylselanyl)methylene)-3-(tosylmethyl)pyrrolidine-2,5-dione

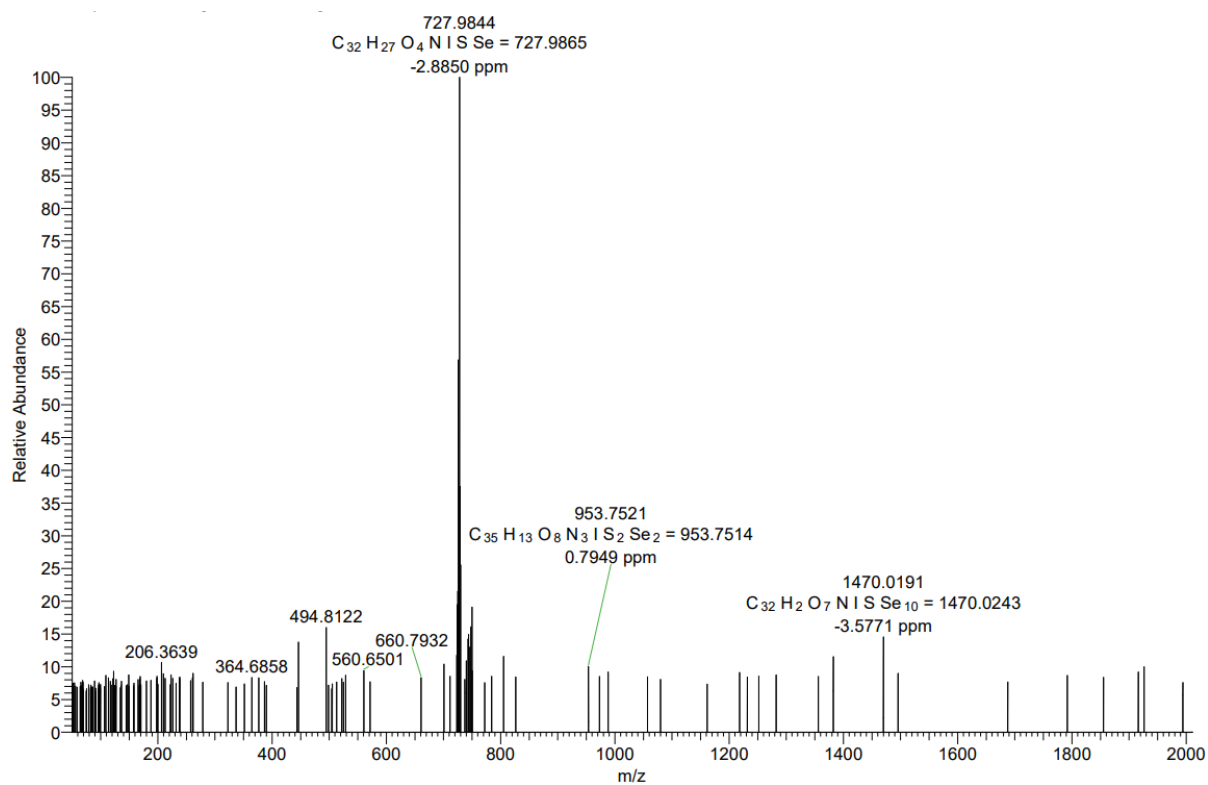

<sup>1</sup>H NMR spectrum of 5h (400 MHz, CDCl<sub>3</sub>)

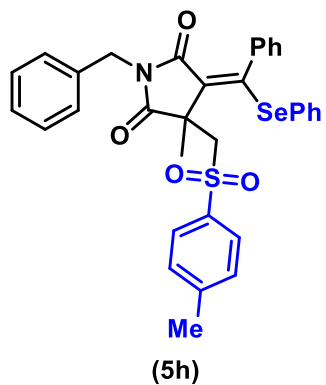

(*E*)-1-benzyl-3-methyl-4-(phenyl(phenylselanyl)methylene)-3-(tosylmethyl)pyrrolidine-2,5-dione

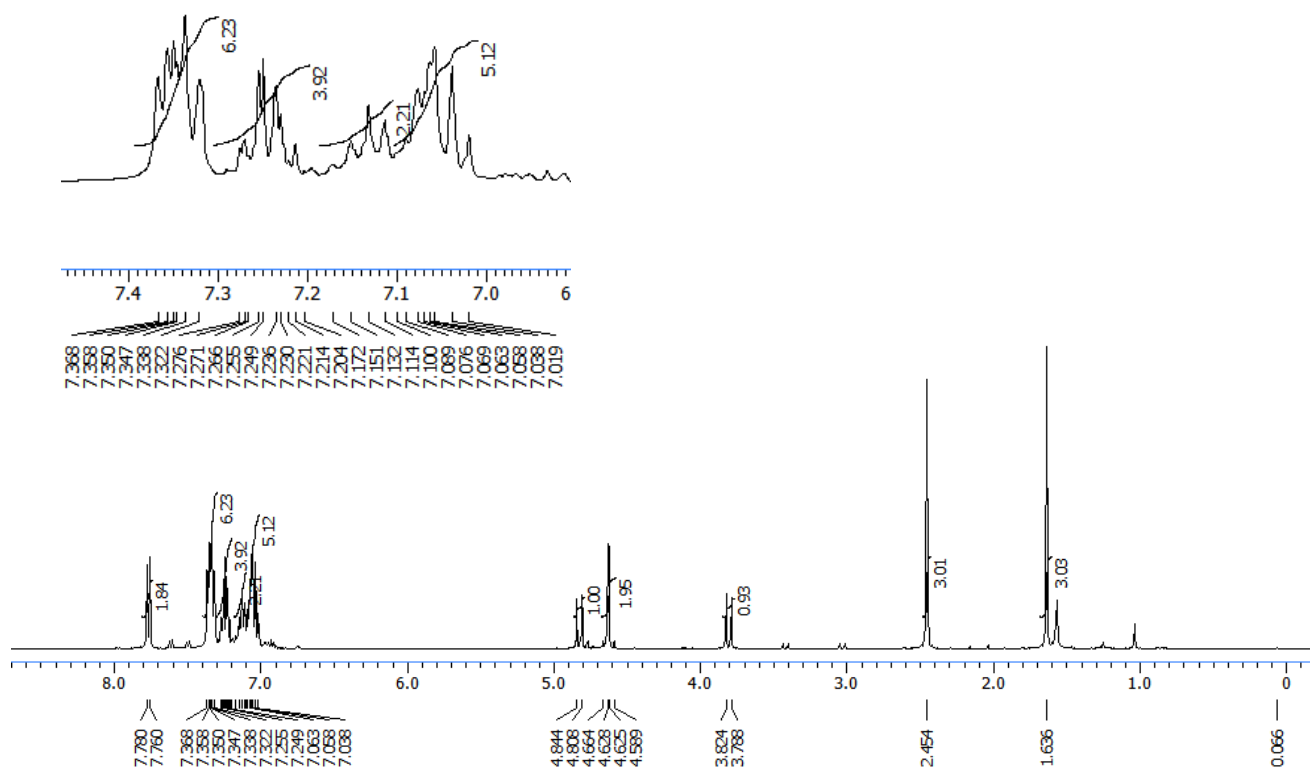

<sup>13</sup>C NMR spectrum of 5h (100 MHz, CDCl<sub>3</sub>)

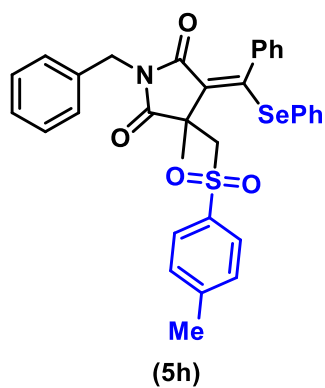

(*E*)-1-benzyl-3-methyl-4-(phenyl(phenylselanyl)methylene)-3-(tosylmethyl)pyrrolidine-2,5-dione

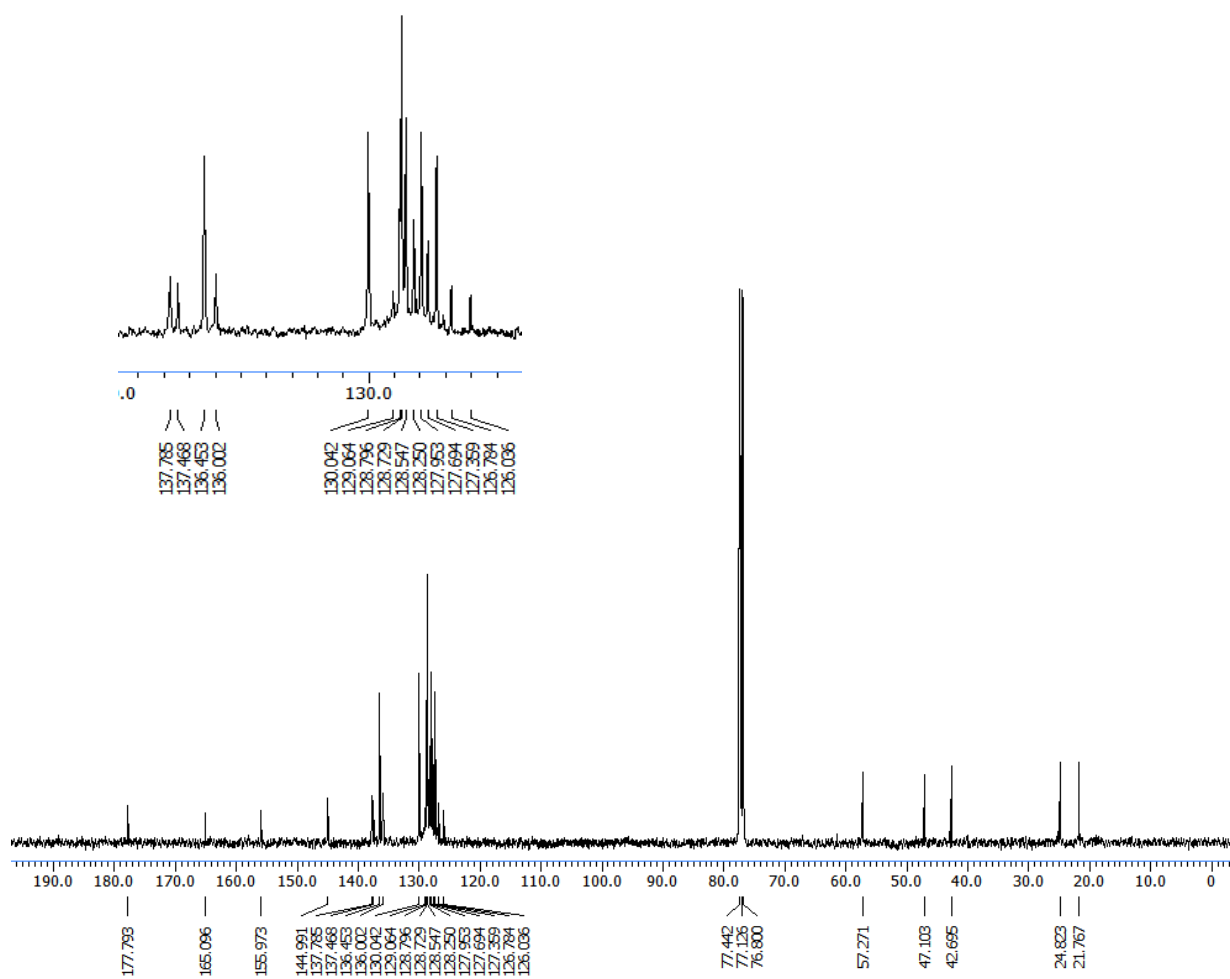

### HRMS Spectrum of 5h

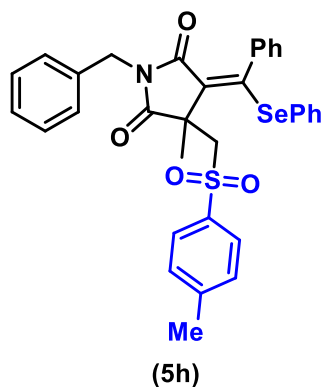

(E)-1-benzyl-3-methyl-4-(phenyl(phenylselanyl)methylene)-3-(tosylmethyl)pyrrolidine-2,5-dione

| Sample Name   | SMP-45   | Position    | P1-A3     | Instrument Name | Instrument 1 | User Name              |                     |
|---------------|----------|-------------|-----------|-----------------|--------------|------------------------|---------------------|
| Inj Vol       | 5        | InjPosition |           | SampleType      | Sample       | IRM Calibration Status | Success             |
| Data Filename | SMP-45.d | ACQ Method  | MS Scan.m | Comment         |              | Acquired Time          | 02-05-2022 11:35:38 |

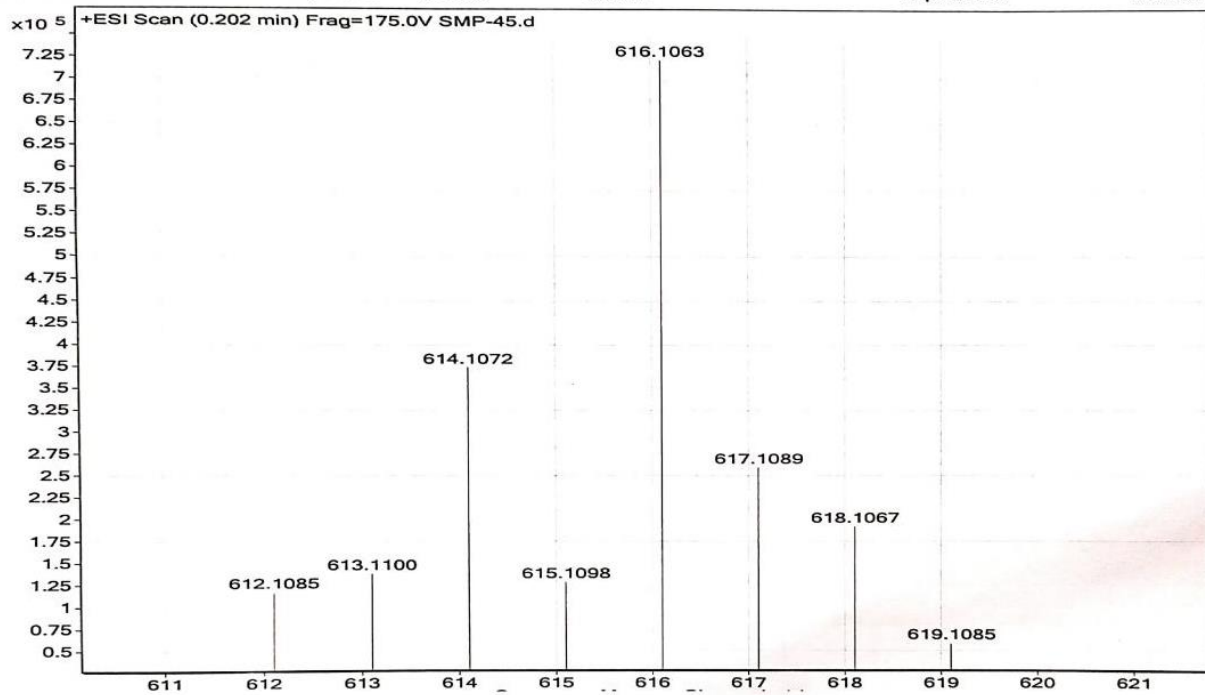

<sup>1</sup>H NMR spectrum of 5i (400 MHz, CDCl<sub>3</sub>)

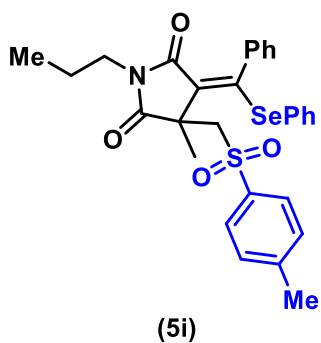

(E)-3-methyl-4-(phenyl(phenylselanyl)methylene)-1-propyl-3-(tosylmethyl)pyrrolidine-2,5-dione

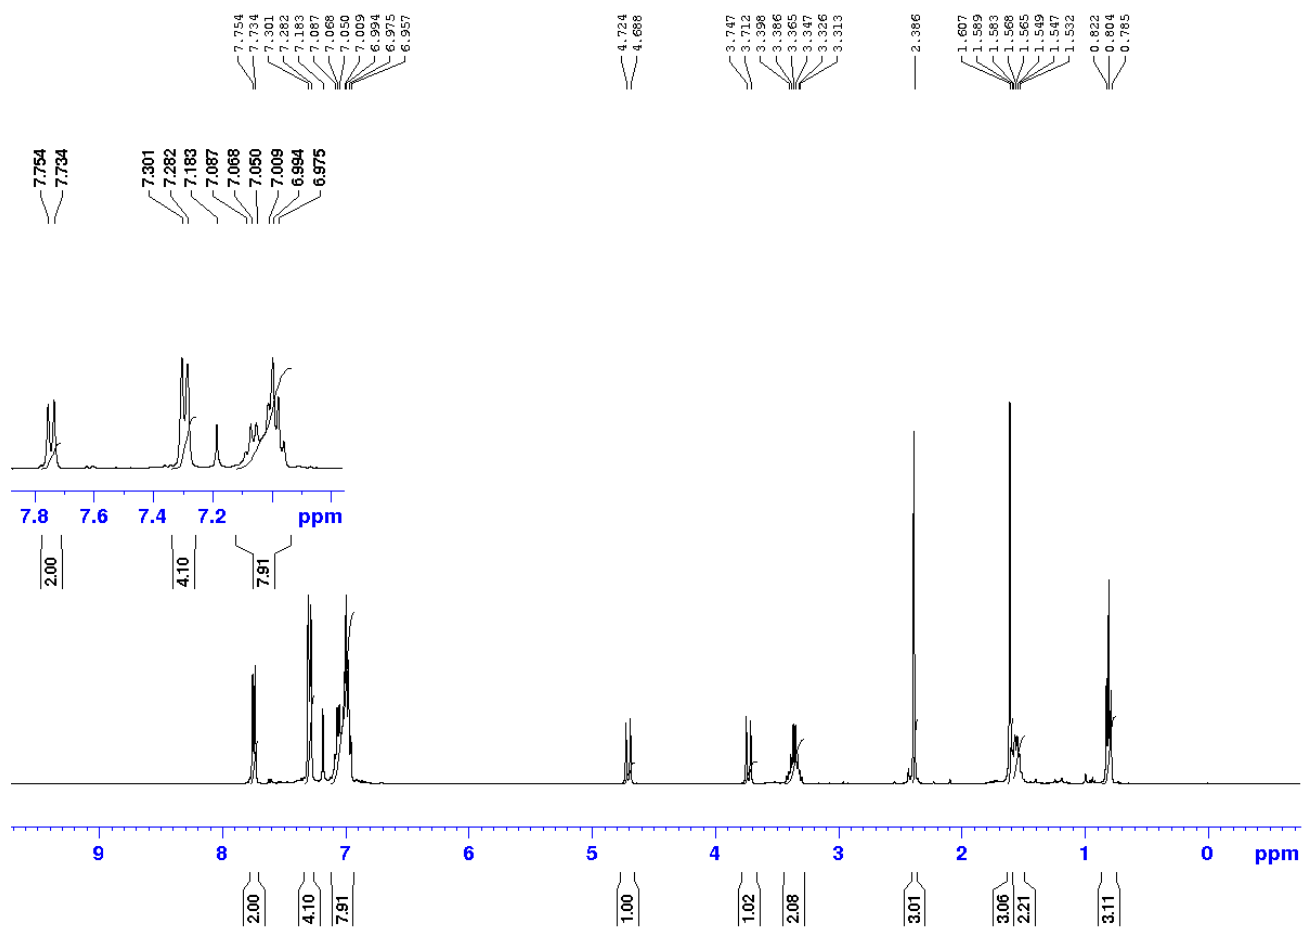

<sup>13</sup>C NMR spectrum of 5i (100 MHz, CDCl<sub>3</sub>)

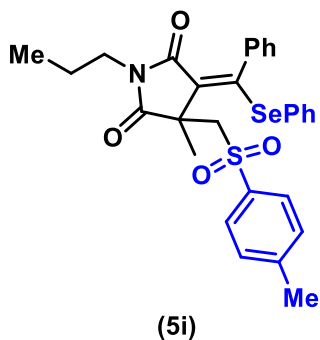

(E)-3-methyl-4-(phenyl(phenylselanyl)methylene)-1-propyl-3-(tosylmethyl)pyrrolidine-2,5-dione

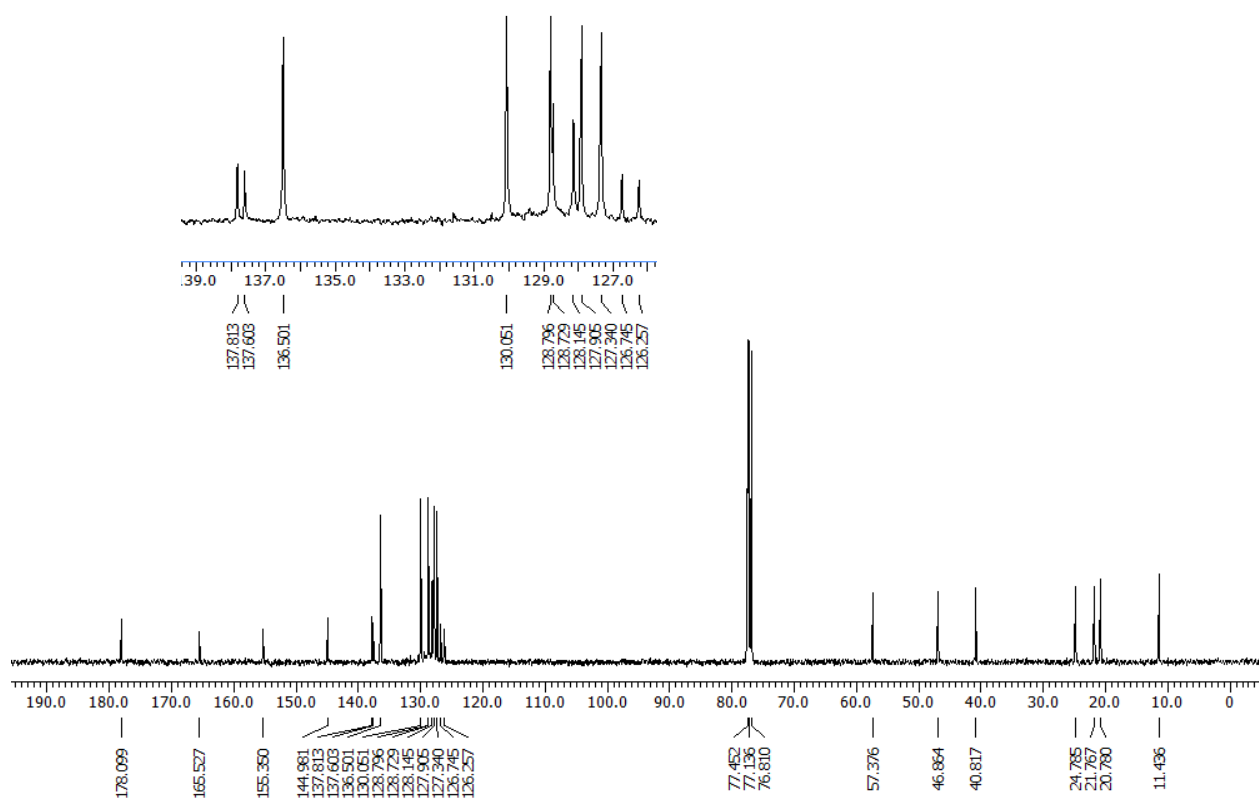



## HRMS Spectrum of 5i

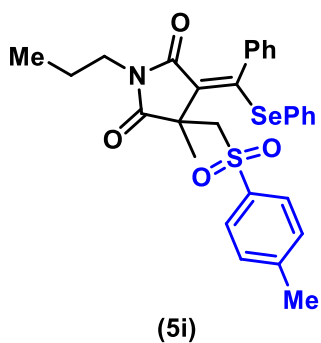

(*E*)-3-methyl-4-(phenyl(phenylselanyl)methylene)-1-propyl-3-(tosylmethyl)pyrrolidine-2,5-dione

| Sample Name   | SMP-54   | Position    | P1-B2     | Instrument Name | Instrument 1 | User Name              |                     |
|---------------|----------|-------------|-----------|-----------------|--------------|------------------------|---------------------|
| Inj Vol       | 5        | InjPosition |           | SampleType      | Sample       | IRM Calibration Status | Success             |
| Data Filename | SMP-54.d | ACQ Method  | MS Scan.m | Comment         |              | Acquired Time          | 02-05-2022 11:50:29 |

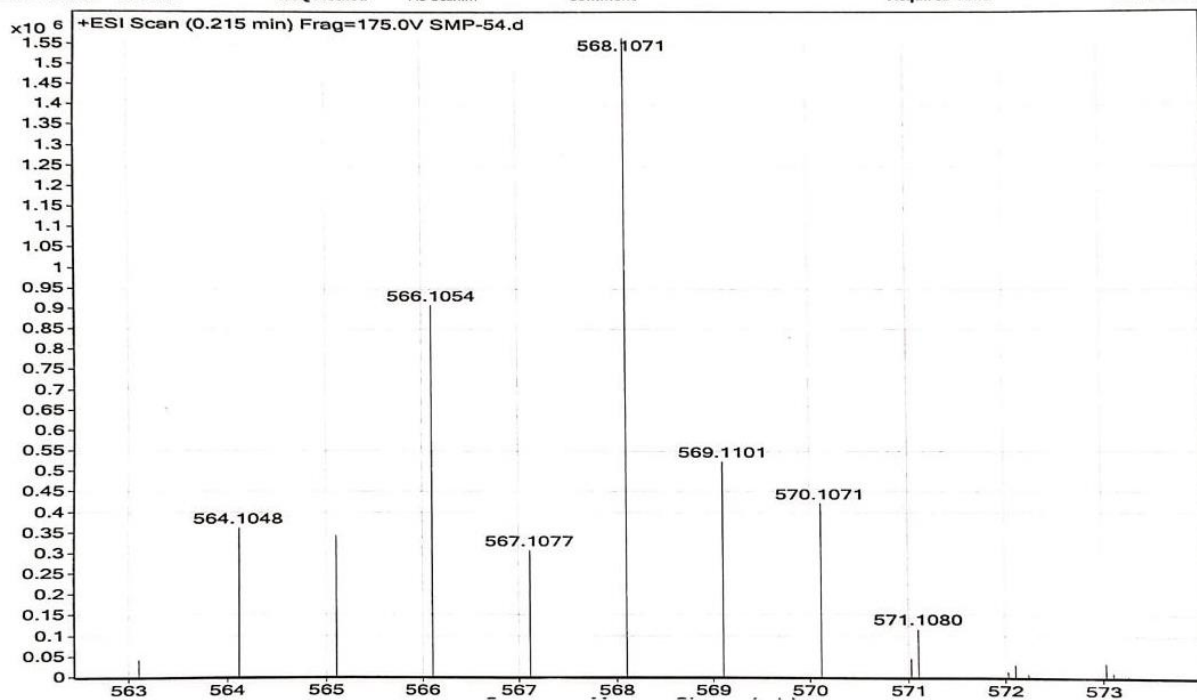

**(10) GCMS Data:**

1) GCMS Data of TEMPO adduct:

| Structure of TEMPO Adduct                                                         | Molecular Formula                   | Molecular weight | Molecular mass found |
|-----------------------------------------------------------------------------------|-------------------------------------|------------------|----------------------|
| 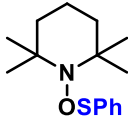 | C <sub>15</sub> H <sub>23</sub> NOS | 265.42           | 266.0                |

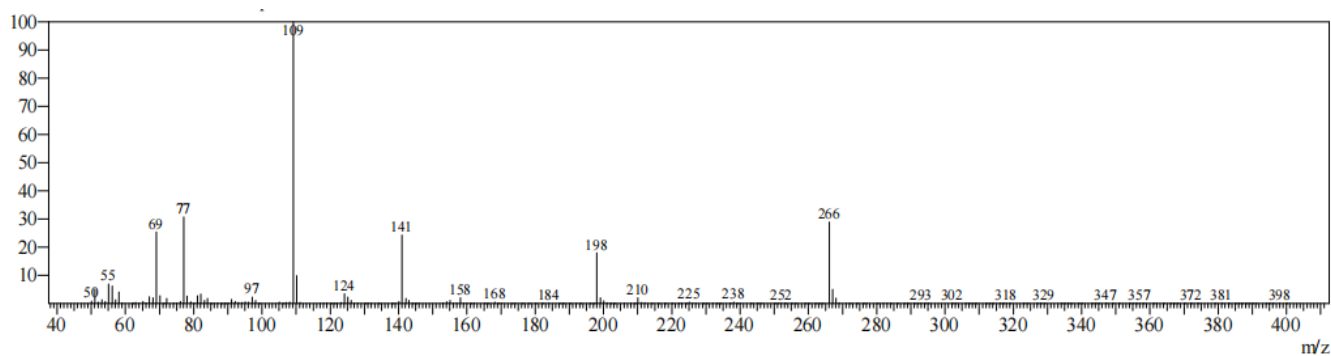

2) GCMS Data of PhSSPh Intermediate:

| Compound | Molecular Formula                              | Molecular weight | Molecular mass found |
|----------|------------------------------------------------|------------------|----------------------|
| PhSSPh   | C <sub>12</sub> H <sub>10</sub> S <sub>2</sub> | 218.02           | 218.0                |

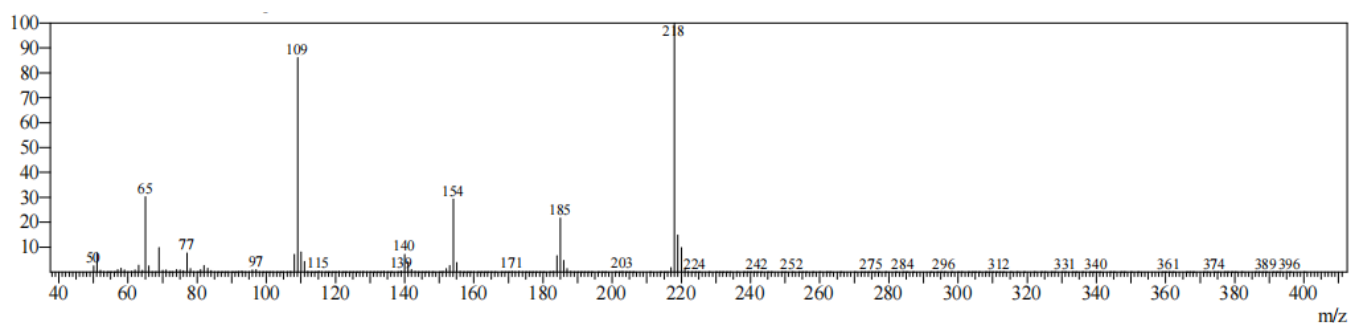

**Figure S2:** GC Mass Spectrum of PhSSPh

### (11) X-Ray Crystallographic Data of 3aa and 5e:

Data Collection and Refinement Single-crystal X-ray data of compounds was collected on Bruker SMART CCD Diffractometer using graphite monochromated MoK $\alpha$  radiation ( $\lambda = 0.71073 \text{ \AA}$ ). Frames were collected at T = 302 K by  $\omega$ ,  $\phi$ , and  $2\theta$ -rotations with full quadrant data collection strategy (four domains each with 600 frames) at 10s per frame with SMART. The measured intensities were reduced to  $F^2$  and corrected for absorption with SADABS. Structure solution, refinement, and data output were carried out with the SHELXTL package by direct methods. Non-hydrogen atoms were refined anisotropically using the WinGX (version 1.80.05) program package.<sup>13</sup> All non-hydrogen atoms were refined anisotropically and hydrogen atoms were treated as riding atoms using SHELX default parameters. Molecular structures have drawn using ORTEP software shown in figure S1 and S2. Further information on the crystal structure determination (excluding structure factors) has been given as table S1 and S2 and also deposited in the Cambridge Crystallographic Data Centre as supplementary publications number 1587648. Copies of the data can be obtained free of charge upon application to CCDC, 12 Union Road, Cambridge CB2 1EZ, UK (fax: (+44) 1223-336-033. e-mail: deposit@ccdc.cam.ac.uk) or via internet.

**Table S2: Crystallographic description of (*E*)-3-methyl-1-phenyl-4-(phenyl(phenylthio)methylene)-3-tosylmethylpyrrolidine-2,5-dione (3aa):**

|                      |                                                                 |                  |
|----------------------|-----------------------------------------------------------------|------------------|
| Identification code  | smt101_0ma_a                                                    |                  |
| Empirical formula    | C <sub>32</sub> H <sub>27</sub> N O <sub>4</sub> S <sub>2</sub> |                  |
| Formula weight       | 553.67                                                          |                  |
| Temperature          | 299 K                                                           |                  |
| Wavelength           | 0.71073                                                         |                  |
| Crystal system       | Monoclinic                                                      |                  |
| Space group          | P 21/n                                                          |                  |
| Unit cell dimensions | a = 15.0121(19) Å                                               | a = 90°.         |
|                      | b = 13.2954(19) Å                                               | b = 113.157(3)°. |

|                                   |                                             |                  |
|-----------------------------------|---------------------------------------------|------------------|
|                                   | $c = 15.133(2) \text{ \AA}$                 | $g = 90^\circ$ . |
| Volume                            | $2777.1(6) \text{ \AA}^3$                   |                  |
| Z                                 | 4                                           |                  |
| Density (calculated)              | $1.324 \text{ Mg/m}^3$                      |                  |
| Absorption coefficient            | $0.230 \text{ mm}^{-1}$                     |                  |
| F(000)                            | 1160.0                                      |                  |
| Crystal size                      | $0.20 \times 0.18 \times 0.16 \text{ mm}^3$ |                  |
| Theta range for data collection   | 2.228 to 28.272°.                           |                  |
| Index ranges                      | -16<=h<=20, -12<=k<=17,-<br>20<=l<=20       |                  |
| Reflections collected             | 4542                                        |                  |
| Independent reflections           | 6739 [R(int) = 0.0366]                      |                  |
| Completeness to theta = 25.242°   | 100 %                                       |                  |
| Absorption correction             | None                                        |                  |
| Refinement method                 | Full-matrix least-squares on F <sup>2</sup> |                  |
| Data / restraints / parameters    | 6739 / 0 / 354                              |                  |
| Goodness-of-fit on F <sup>2</sup> | 1.066                                       |                  |
| Final R indices [I>2sigma(I)]     | R1 = 0.0684, wR2 = 0.1389                   |                  |
| R indices (all data)              | R1 = 0.1057, wR2 = 0.1591                   |                  |
| Largest diff. peak and hole       | 0.9325 and -0.7958 e.Å <sup>-3</sup>        |                  |
| CCDC                              | 2145105                                     |                  |

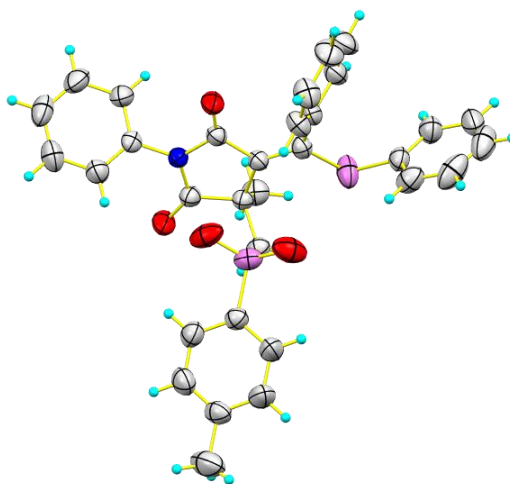

**Figure S3:** ORTEP diagram of **3aa**



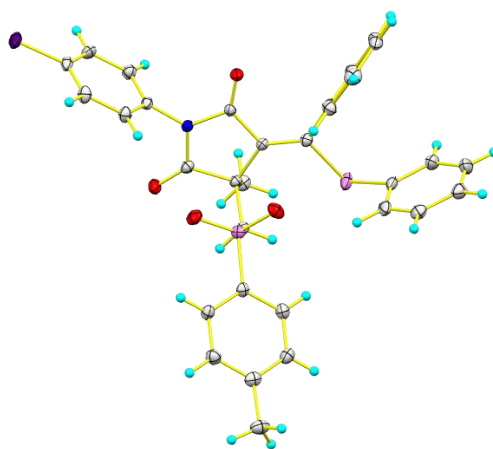

**Figure S4:** ORTEP diagram of **5e**

**(12) References:**

- 1) Gu, Y.; Dai, L.; Mao, K.; Zhang, J.; Wang, C.; Zhao, L.; Rong, L.; *Org. Lett.* **2020**, *22*, 2956.
- 2) Mampuys, P; Zhu, Y; Vlaar, T; Ruijter, E; Orru, R.V.; Maes, B.U. *Angew. Chem. Int. Ed.* **2014**, *53*,12849.
- 3) Wang, W; Peng, X; Wei, F; Tung, C.H.; Xu, Z. *Angew. Chem. Int. Ed.* **2016**, *55*, 649.
- 4) Zhang, R; Xu, P; Wang, S.Y; Ji, S.J. *J. Org. Chem.* **2019**, *84*,12324.
- 5) (a) Sheldrick, G. M. *Acta Crystallogr.*, Sect. A: *Found. Crystallogr.*, **1990**, *46*, 467; (b) Sheldrick, G. M. SHELXL-NT Version 6.12, University of Gottingen, Germany, **2000**.
- 6) Farrugia, L. J. *J. Appl. Cryst.* **1999**, *32*, 837.
